# Supplementary material for: Exosome component 1 cleaves single-stranded DNA and sensitizes human kidney renal clear cell carcinoma cells to poly(ADP-ribose) polymerase inhibitor
Source: eLife. 2021 Jun 23;10:e69454. doi: 10.7554/eLife.69454 (PMC8260222; doi:10.7554/eLife.69454)
Supplement: Figure 1—source data 1. [file elife-69454-fig1-data1.xlsx]

## Sheet: E
TCGA_Patient_ID	C>A/G>T mutation number	CRB3	GAPDH
TCGA-A3-3363-01	49	0.8992	-1.1031
TCGA-AS-3778-01	31	1.5765	-0.1284
TCGA-A3-3382-01	58	-0.3935	1.1986
TCGA-A3-3374-01	163	1.478	-0.4225
TCGA-A3-3313-01	62	0.1421	-1.4677
TCGA-A3-3346-01	31	-0.1205	3.9683
TCGA-AK-3427-01	29	1.063	-0.802
TCGA-A3-3316-01	36	-0.9077	-0.085
TCGA-A3-3319-01	30	-0.5253	5.3699
TCGA-AK-3440-01	14	3.6978	-0.7613
TCGA-AK-3465-01	14	1.0492	-0.6581
TCGA-A3-3365-01	33	-0.65	-1.1952
TCGA-A3-3378-01	13	-0.7446	-0.6479
TCGA-AS-3777-01	27	2.2737	-0.847
TCGA-A3-3308-01	21	-0.6109	-0.1724
TCGA-A3-3320-01	36	0.5243	-1.0786
TCGA-AK-3444-01	32	0.3386	-0.1739
TCGA-AK-3453-01	10	1.4871	-0.7215
TCGA-AK-3447-01	22	15.7561	1.6894
TCGA-A3-3383-01	11	1.5265	0.8158
TCGA-A3-3380-01	35	0.2149	-0.8128
TCGA-A3-3372-01	24	-0.3412	-1.4653
TCGA-AK-3443-01	4	1.591	-1.5235
TCGA-A3-3322-01	22	0.9464	-0.4337
TCGA-B0-5098-01	78	-1.0039	1.6221
TCGA-A3-3331-01	37	0.3429	-1.1115
TCGA-B2-3924-01	17	-0.447	-0.5124
TCGA-CZ-5465-01	15	0.1523	1.0343
TCGA-CW-5589-01	11	-0.0758	0.2604
TCGA-B2-4098-01	10	-0.4125	-0.0871
TCGA-CJ-5684-01	14	0.3139	0.9627
TCGA-BP-5176-01	25	0.8302	1.9777
TCGA-B2-4099-01	15	0.273	-0.5714
TCGA-CJ-4638-01	11	-0.0991	2.5811
TCGA-B8-5163-01	15	-1.0635	1.1768
TCGA-B0-5713-01	20	0.1064	-0.414
TCGA-BP-4807-01	5	0.6466	0.0603
TCGA-A3-3367-01	13	0.0956	0.2197
TCGA-CW-5588-01	7	-0.0284	2.0026
TCGA-B0-5119-01	18	0.474	-0.5704
TCGA-B0-5099-01	9	0.3804	-0.827
TCGA-B0-5096-01	17	-0.4369	0.9604
TCGA-BP-4993-01	15	-0.1125	-0.2475
TCGA-B0-4710-01	20	0.4653	-0.5321
TCGA-BP-4963-01	14	0.2459	0.5631
TCGA-CZ-5456-01	11	1.209	2.2663
TCGA-DV-5576-01	4	-0.2179	0.0206
TCGA-CJ-5681-01	7	-0.0253	-0.4488
TCGA-CJ-4643-01	12	-0.099	-0.8679
TCGA-B8-4622-01	4	0.3107	0.8132
TCGA-BP-4967-01	12	0.725	-0.3318
TCGA-B0-5703-01	10	1.5077	-0.697
TCGA-CZ-5460-01	8	0.7902	1.0478
TCGA-B0-5697-01	8	0.0011	0.2945
TCGA-CW-6090-01	18	-1.1549	0.5804
TCGA-B0-4823-01	23	0.4855	1.3062
TCGA-BP-5009-01	5	-0.2783	1.3815
TCGA-CJ-5679-01	15	-0.2221	5.0417
TCGA-B8-5164-01	19	-0.4266	-0.7562
TCGA-CJ-4634-01	13	0.2088	-1.139
TCGA-B0-5102-01	9	0.2082	-0.4318
TCGA-B0-5691-01	12	-0.1458	-1.0446
TCGA-CZ-4859-01	14	0.8716	-0.3068
TCGA-AK-3455-01	7	-0.3618	-0.4078
TCGA-EU-5905-01	16	-0.5878	-0.1399
TCGA-BP-5168-01	16	0.3751	-0.7663
TCGA-B0-4818-01	15	0.0113	-0.1684
TCGA-B8-4151-01	14	1.0474	0.584
TCGA-A3-3349-01	6	-0.2763	-0.83
TCGA-B4-5832-01	14	-1.4409	-1.8089
TCGA-BP-5181-01	16	0.805	0.1914
TCGA-CJ-5676-01	14	0.283	1.1376
TCGA-BP-4973-01	6	0.4964	-0.2903
TCGA-B0-4811-01	14	0.4857	1.6023
TCGA-B0-5110-01	18	-0.3091	-1.1528
TCGA-BP-4965-01	13	-0.1832	-0.8555
TCGA-B0-4852-01	24	-0.5599	-0.7206
TCGA-CJ-4869-01	17	-0.1284	0.9264
TCGA-BP-4164-01	8	-0.021	-0.4313
TCGA-A3-3357-01	19	0.1585	0.5332
TCGA-B0-5075-01	20	0.1256	0.784
TCGA-BP-4968-01	8	-0.2103	1.0692
TCGA-BP-4964-01	18	0.1888	0.6558
TCGA-BP-4161-01	15	-0.2125	-0.0238
TCGA-A3-3323-01	11	-0.1585	-0.3869
TCGA-BP-5196-01	9	-0.7421	0.7193
TCGA-B0-5108-01	9	-1.0402	-0.599
TCGA-B0-5115-01	10	0.0491	-0.0565
TCGA-CJ-5682-01	17	0.3022	-0.517
TCGA-B0-5402-01	14	-0.0305	-0.2831
TCGA-AK-3456-01	6	0.6855	-0.3485
TCGA-CJ-4916-01	11	-0.391	-0.2663
TCGA-BP-4162-01	8	0.0019	-0.4051
TCGA-B0-5712-01	18	0.9496	0.3901
TCGA-B2-5635-01	5	-0.0401	-0.4026
TCGA-CW-6093-01	20	-0.4174	-0.7614
TCGA-DV-5574-01	5	-1.0673	-0.7266
TCGA-CJ-4637-01	8	-1.0702	-0.4107
TCGA-B0-5092-01	13	-0.6668	0.3337
TCGA-CW-5591-01	12	0.3374	-1.5379
TCGA-B0-5085-01	14	0.663	1.7317
TCGA-BP-5200-01	8	-0.1739	-1.2765
TCGA-CJ-4875-01	22	-0.0046	-0.148
TCGA-CZ-5451-01	9	1.061	0.167
TCGA-CZ-5463-01	15	0.0434	-1.0993
TCGA-B8-4620-01	14	-0.5443	0.5241
TCGA-BP-4985-01	20	-0.8815	5.6888
TCGA-B0-5084-01	10	-0.7276	2.1705
TCGA-CJ-6030-01	23	-0.4067	-0.1026
TCGA-B0-5694-01	12	0.8594	1.8675
TCGA-DV-5569-01	4	-0.1931	0.6797
TCGA-B0-5117-01	12	1.2886	-0.1273
TCGA-B0-5701-01	19	-0.2741	0.6377
TCGA-BP-4983-01	13	-1.4463	1.8398
TCGA-BP-5201-01	9	0.6387	0.342
TCGA-DV-5575-01	7	-0.2185	-0.0265
TCGA-AK-3436-01	10	1.4055	5.6732
TCGA-B0-5106-01	25	-0.8162	-0.8052
TCGA-B0-5709-01	20	-0.5045	-1.0478
TCGA-CW-5581-01	13	0.2241	0.4398
TCGA-CJ-4639-01	13	0.5616	-0.7669
TCGA-B0-5094-01	15	-0.0506	1.0594
TCGA-B0-4842-01	12	0.0186	3.4542
TCGA-B8-4621-01	21	0.8752	0.4322
TCGA-B0-4827-01	14	-0.3385	1.2151
TCGA-A3-3311-01	13	0.1849	-0.0419
TCGA-BP-5169-01	21	-1.2875	2.6863
TCGA-B8-4153-01	13	0.3492	1.3196
TCGA-B0-5702-01	15	0.0821	-0.1897
TCGA-BP-4167-01	8	-0.3932	2.5464
TCGA-A3-3326-01	8	0.217	-0.148
TCGA-B0-5707-01	7	0.9516	-0.402
TCGA-BP-5187-01	9	-0.3538	0.0976
TCGA-B0-5692-01	13	0.5875	-0.1001
TCGA-BP-5192-01	5	0.6328	0.5445
TCGA-BP-4989-01	15	-1.219	-0.8389
TCGA-B0-5088-01	9	-0.4151	-0.0824
TCGA-BP-5184-01	4	0.4216	0.4149
TCGA-B0-5705-01	21	0.2664	-0.636
TCGA-AK-3458-01	7	2.6831	1.0143
TCGA-B8-4146-01	8	-1.1237	-1.7104
TCGA-BP-4787-01	8	-0.1897	2.3551
TCGA-B4-5836-01	15	0.1671	-0.1764
TCGA-B8-4148-01	5	-0.1104	-1.2626
TCGA-B8-4154-01	18	1.3267	1.5032
TCGA-CZ-5458-01	3	0.7577	0.8447
TCGA-CJ-4640-01	20	-0.5241	-0.7792
TCGA-B0-5121-01	13	-0.372	0.6213
TCGA-B0-5113-01	10	-0.1124	-0.7883
TCGA-CZ-5468-01	23	-1.1101	3.7434
TCGA-BP-5010-01	15	-0.3798	1.4454
TCGA-BP-5007-01	8	0.4052	0.0288
TCGA-B4-5834-01	5	-0.0568	-0.7727
TCGA-EU-5904-01	11	0.2428	-0.6874
TCGA-BP-4972-01	9	0.0034	-0.2991
TCGA-CJ-4644-01	20	0.287	-0.1001
TCGA-CZ-5984-01	14	0.5003	1.3911
TCGA-CZ-5453-01	11	0.8577	0.1022
TCGA-B0-5107-01	11	-0.0241	5.0041
TCGA-A3-3373-01	6	0.2889	-0.9576
TCGA-CW-5580-01	11	0.4473	0.2504
TCGA-B0-5120-01	16	0.2106	-0.1899
TCGA-B8-4143-01	20	-1.2177	0.3602
TCGA-B8-5159-01	8	0.564	-1.1092
TCGA-B0-5399-01	13	0.1458	1.862
TCGA-CZ-4853-01	24	1.773	1.0608
TCGA-CJ-4920-01	32	-0.2628	0.6013
TCGA-BP-4976-01	20	0.5751	0.3905
TCGA-CJ-6027-01	16	-0.671	1.5476
TCGA-B0-4712-01	16	-0.7346	4.42
TCGA-B0-5698-01	13	-0.2788	-0.538
TCGA-BP-4960-01	14	-0.1343	2.5936
TCGA-BP-5198-01	16	-0.6984	0.2636
TCGA-B0-4815-01	10	-0.8604	1.0293
TCGA-CJ-4899-01	9	-0.2631	-0.9104
TCGA-CJ-6028-01	15	-0.3737	0.2062
TCGA-B0-4816-01	12	-0.5895	0.0989
TCGA-CJ-4905-01	10	-0.3846	-0.554
TCGA-B0-5695-01	10	0.1887	0.4383
TCGA-B8-5549-01	16	0.0608	0.0691
TCGA-B0-4700-01	7	-1.1425	2.3553
TCGA-B0-5706-01	9	-0.6167	-0.2352
TCGA-CW-5583-01	4	0.9616	-0.4896
TCGA-BP-4961-01	10	-0.4735	-0.8396
TCGA-BP-5190-01	10	-0.1571	1.9265
TCGA-BP-5183-01	9	0.2697	0.8544
TCGA-BP-5182-01	20	-0.2935	0.1134
TCGA-BP-5174-01	11	0.2149	1.5509
TCGA-CJ-5675-01	11	0.4101	0.6602
TCGA-BP-4338-01	9	-1.1843	4.4932
TCGA-BP-4795-01	6	-0.4563	-0.8775
TCGA-B4-5838-01	9	-0.3777	1.056
TCGA-CZ-5455-01	4	-0.192	-0.8727
TCGA-BP-5199-01	18	-0.6281	1.369
TCGA-B0-4814-01	15	0.5006	-0.0219
TCGA-CJ-5678-01	14	0.2822	-0.7376
TCGA-BP-5008-01	8	-0.0659	-0.5437
TCGA-BP-4782-01	16	-0.25	1.5998
TCGA-CZ-5988-01	7	-0.7969	0.333
TCGA-BP-4352-01	16	-1.3922	2.5889
TCGA-AK-3451-01	21	2.6168	2.8533
TCGA-CJ-6032-01	10	0.3399	-0.6441
TCGA-B0-4810-01	16	-0.5248	0.7667
TCGA-B0-5077-01	11	-0.3501	0.3115
TCGA-DV-5565-01	10	-0.4296	0.0551
TCGA-B0-5095-01	13	-0.8392	0.9183
TCGA-BP-4999-01	9	-0.1399	-0.9656
TCGA-CZ-4861-01	27	-0.2288	1.3387
TCGA-BP-4347-01	11	-0.691	-0.9157
TCGA-BP-4986-01	3	-0.5432	0.1089
TCGA-CJ-4636-01	10	-0.5543	0.1003
TCGA-CW-6087-01	11	-1.1721	-0.9035
TCGA-BP-5000-01	8	-0.4228	1.171
TCGA-CZ-4856-01	8	0.5939	1.9914
TCGA-CJ-4871-01	8	-0.0513	0.2163
TCGA-B0-5710-01	8	-0.3595	-1.1418
TCGA-BP-4756-01	9	0.2397	-1.0273
TCGA-B0-5116-01	11	0.2343	5.5067
TCGA-B2-5633-01	5	-0.2731	-0.6592
TCGA-BP-4158-01	14	0.263	-0.3054
TCGA-CZ-4866-01	14	0.5751	-0.0566
TCGA-A3-3358-01	15	0.1506	0.1599
TCGA-CZ-5469-01	9	2.4439	6.9566
TCGA-B0-5100-01	5	-0.1131	0.3959
TCGA-B8-5550-01	18	-0.6596	-0.0299
TCGA-CZ-5989-01	6	-1.3829	-2.0737
TCGA-CJ-4904-01	6	-0.3259	-1.1315
TCGA-B0-5696-01	16	0.1613	2.8493
TCGA-CJ-5671-01	16	-0.0987	0.4694
TCGA-CZ-5466-01	14	1.0429	3.4038
TCGA-CJ-5686-01	19	-0.2789	0.4389
TCGA-B4-5835-01	34	1.1383	-0.2334
TCGA-BP-5180-01	6	1.6027	2.3691
TCGA-CJ-4918-01	26	-0.7851	-0.816
TCGA-CJ-6033-01	13	-0.6796	1.8353
TCGA-CJ-5683-01	14	0.6812	1.8917
TCGA-EU-5907-01	7	0.8776	0.8876
TCGA-BP-5185-01	8	2.2194	1.4485
TCGA-CZ-5467-01	13	-0.56	-0.6511
TCGA-BP-4781-01	8	0.3408	-0.3969
TCGA-CJ-4907-01	17	0.1038	-0.5537
TCGA-CW-6097-01	9	-1.0899	0.0424
TCGA-B8-5551-01	8	-1.1756	0.6474
TCGA-CZ-5462-01	16	-0.207	-0.0958
TCGA-B0-5109-01	16	-0.8904	2.4378
TCGA-B0-4945-01	10	-0.7011	-1.0398
TCGA-B8-5546-01	5	0.4678	-1.263
TCGA-B0-5104-01	16	-0.1729	-0.8751
TCGA-BP-4992-01	7	-0.8627	0.0865
TCGA-CJ-4889-01	2	-0.6093	-1.105
TCGA-B0-5080-01	14	-1.2441	-0.1909
TCGA-BP-4177-01	6	0.0257	-0.426
TCGA-CZ-5454-01	5	0.0612	0.0902
TCGA-A3-3376-01	14	-0.8121	-1.0052
TCGA-A3-3385-01	15	1.0476	0.0801
TCGA-CZ-5985-01	18	0.2217	-0.0934
TCGA-BP-5006-01	5	0.1008	0.0219
TCGA-BP-4173-01	2	-0.7971	-0.5107
TCGA-CZ-5452-01	10	-0.3297	1.3467
TCGA-CW-5585-01	7	1.988	-0.6238
TCGA-CJ-4923-01	6	-0.6986	2.4083
TCGA-AK-3425-01	10	-0.0648	1.9913
TCGA-BP-4766-01	7	0.9037	-1.0271
TCGA-BP-4774-01	9	-0.1945	0.0124
TCGA-AK-3460-01	10	0.1815	-0.2301
TCGA-BP-5001-01	7	0.0375	1.7917
TCGA-B0-5693-01	6	-0.0146	-0.406
TCGA-BP-5195-01	6	0.1403	-0.6405
TCGA-CJ-4870-01	9	0.5772	1.0414
TCGA-B8-5545-01	3	-0.43	-0.8805
TCGA-CJ-4878-01	2	-0.3274	-0.8256
TCGA-B8-5552-01	7	-0.2637	-0.8984
TCGA-BP-4770-01	15	-1.5117	0.8316
TCGA-BP-5170-01	9	-0.1157	1.3738
TCGA-CJ-4890-01	2	-1.3168	-0.6004
TCGA-B0-5699-01	7	1.3587	0.1327
TCGA-CZ-4854-01	22	0.6239	2.3406
TCGA-B2-5641-01	10	0.5357	-0.0256
TCGA-BP-4760-01	3	0.1027	0.0681
TCGA-A3-3387-01	20	0.048	-0.0839
TCGA-CJ-4894-01	7	-0.0669	-1.5736
TCGA-BP-4331-01	16	0.2112	-0.3877
TCGA-B0-5400-01	10	-0.6121	2.2903
TCGA-BP-4163-01	7	-0.335	1.085
TCGA-CZ-4862-01	4	-0.3774	-1.0812
TCGA-CJ-4900-01	9	-0.8663	-0.0692
TCGA-A3-3370-01	3	0.0624	-0.6725
TCGA-CJ-4882-01	15	-0.7868	-0.0721
TCGA-BP-4994-01	13	0.8989	-0.7762
TCGA-CZ-5987-01	12	1.0774	1.7234
TCGA-B0-4843-01	13	-1.0213	1.0985
TCGA-B8-5158-01	14	-0.3459	0.9842
TCGA-BP-4962-01	6	0.3539	0.9594
TCGA-BP-4988-01	6	-1.2248	-0.4949
TCGA-CZ-5461-01	21	0.5119	0.7505
TCGA-B8-5162-01	21	-1.0888	-0.4242
TCGA-B0-5711-01	7	0.6413	-0.5284
TCGA-BP-5173-01	19	-0.4142	0.8182
TCGA-B4-5844-01	14	-0.22	-0.8525
TCGA-BP-4160-01	13	0.0783	0.5593
TCGA-BP-5186-01	9	0.5753	-0.1914
TCGA-CJ-6031-01	15	-0.064	0.4527
TCGA-BP-4981-01	6	-0.202	0.326
TCGA-B0-4828-01	19	0.1676	0.4324
TCGA-B0-5081-01	12	-0.7095	-0.3396
TCGA-BP-4799-01	4	-0.8768	-0.6106
TCGA-DV-5568-01	2	-0.3082	2.9933
TCGA-B0-4849-01	8	-0.1887	-0.3843
TCGA-BP-5178-01	14	-0.4286	4.4264
TCGA-BP-5191-01	16	0.6181	6.6741
TCGA-AK-3428-01	10	0.0957	-0.0928
TCGA-BP-4176-01	21	0.0121	0.7159
TCGA-CJ-4897-01	10	0.8579	-0.6406
TCGA-CZ-5457-01	12	0.3881	-0.8242
TCGA-B0-4706-01	12	0.3483	0.2164
TCGA-CZ-5470-01	9	0.5824	2.461
TCGA-BP-5004-01	7	-0.2218	-0.5583
TCGA-BP-4771-01	9	-1.1955	-0.7702
TCGA-BP-4974-01	5	-0.9949	-0.885
TCGA-B4-5843-01	6	-0.4068	-0.3597
TCGA-B0-4846-01	10	-0.1218	-0.828
TCGA-CJ-5677-01	10	-0.6686	2.8813
TCGA-B0-4837-01	7	-0.5913	2.0107
TCGA-B0-4847-01	8	-0.1425	0.095
TCGA-BP-4329-01	9	0.466	1.1833
TCGA-CJ-4912-01	12	-0.3141	3.5842
TCGA-BP-4351-01	15	-0.6016	0.8464
TCGA-CZ-5459-01	20	0.2215	0.7589
TCGA-DV-5566-01	5	0.5094	0.6458
TCGA-CZ-5986-01	7	-0.4741	-0.1828
TCGA-BP-4768-01	14	1.6447	1.0144
TCGA-CZ-5982-01	11	-0.1512	-0.783
TCGA-CJ-5672-01	21	-0.456	-0.1335
TCGA-B0-4836-01	3	-0.5466	0.8289
TCGA-BP-5194-01	6	0.6082	-0.3589
TCGA-CJ-4641-01	12	-0.4523	-0.24
TCGA-CJ-4908-01	7	-0.608	-0.7464
TCGA-EU-5906-01	8	0.1523	-0.3172
TCGA-B2-4101-01	11	-0.4546	-0.7274
TCGA-BP-4971-01	15	-1.1299	-1.2221
TCGA-BP-4995-01	8	0.5113	-0.4919
TCGA-BP-4991-01	13	0.0415	-1.0908
TCGA-BP-4987-01	4	0.6114	-0.5707
TCGA-CJ-4868-01	9	-0.6089	0.7962
TCGA-BP-4174-01	9	-0.1592	0.5632
TCGA-CJ-4876-01	4	-0.3186	-0.9339
TCGA-B0-4817-01	13	0.1673	2.402
TCGA-B0-4841-01	15	0.9581	0.3575
TCGA-AK-3454-01	7	0.4698	-0.3877
TCGA-B0-4694-01	13	0.2486	1.0843
TCGA-CJ-4873-01	16	0.4704	4.6722
TCGA-CJ-4893-01	5	0.2086	-1.1253
TCGA-AK-3434-01	12	0.0689	0.0873
TCGA-BP-4326-01	13	-1.1817	0.3539
TCGA-BP-5202-01	7	-0.0093	0.2838
TCGA-CZ-4857-01	13	-0.8562	3.3675
TCGA-BP-5177-01	6	-0.6088	0.8606
TCGA-CZ-4863-01	9	0.1406	-0.2209
TCGA-B0-4718-01	13	-0.6649	0.2349
TCGA-B8-4619-01	4	-0.8002	-1.5509
TCGA-B8-5553-01	12	-0.0105	-0.3989
TCGA-BP-4977-01	7	0.3563	-0.1054
TCGA-BP-4970-01	8	-0.1606	-0.5536
TCGA-AK-3461-01	8	0.2593	-0.9485
TCGA-BP-4761-01	24	0.9394	6.9832
TCGA-AK-3431-01	15	-0.4731	-0.313
TCGA-B8-5165-01	4	-0.0079	-0.7322
TCGA-B4-5377-01	14	0.5927	-0.2594
TCGA-BP-4975-01	0	0.3597	0.7183
TCGA-BP-4982-01	14	-0.2162	-0.4564
TCGA-B0-4691-01	30	-0.3077	3.177
TCGA-B0-4693-01	19	1.0454	0.8519
TCGA-CJ-4895-01	7	-0.5884	0.4494
TCGA-CZ-4865-01	10	-0.3438	0.0926
TCGA-A3-3347-01	4	-0.862	0.2696
TCGA-CJ-4902-01	15	-0.4123	0.1371
TCGA-BP-4159-01	17	-0.2592	0.7459
TCGA-BP-4775-01	9	0.3655	-1.2513
TCGA-B2-3923-01	4	1.5618	-0.9866
TCGA-BP-4337-01	14	-0.6958	-0.2303
TCGA-BP-5175-01	10	-0.5351	11.6854
TCGA-B0-4813-01	15	-0.5352	0.3776
TCGA-AK-3429-01	7	0.4857	-0.6396
TCGA-BP-4998-01	7	-0.3173	-0.8751
TCGA-CJ-5680-01	14	0.2639	0.2796
TCGA-BP-5189-01	7	-0.8682	-0.1994
TCGA-B0-5812-01	9	-0.5251	-0.5644
TCGA-CJ-4874-01	9	0.0796	-0.411
TCGA-A3-3362-01	11	0.0781	0.211
TCGA-BP-4341-01	10	0.28	0.5812
TCGA-CJ-4901-01	16	-0.4215	0.8374
TCGA-A3-3317-01	12	-0.2486	-1.2183
TCGA-BP-4801-01	16	0.6386	0.0361
TCGA-B0-5083-01	5	0.3942	-0.6747
TCGA-B0-5097-01	16	-1.2161	0.321
TCGA-B0-4844-01	13	1.5734	1.9281
TCGA-CJ-4903-01	13	0.2464	-0.0137
TCGA-BP-4790-01	7	-0.3791	-1.236
TCGA-CJ-4891-01	3	-0.559	3.8899
TCGA-BP-4169-01	9	-1.077	-0.4738
TCGA-BP-4804-01	4	-0.0805	0.234
TCGA-BP-4170-01	8	0.228	-0.3554
TCGA-BP-4343-01	8	-0.7003	0.1247
TCGA-CJ-4888-01	3	-1.1046	0.0429
TCGA-B0-4697-01	11	-0.8973	0.0102
TCGA-BP-4330-01	11	0.3226	-0.7006
TCGA-CJ-4635-01	7	0.9314	-0.5175
TCGA-CJ-4887-01	11	0.5605	1.3659
TCGA-BP-4346-01	11	-0.304	-1.075
TCGA-B0-4839-01	12	0.3352	1.0302
TCGA-BP-4345-01	6	-1.2569	-0.3441
TCGA-B0-4838-01	8	-0.1812	-0.3075
TCGA-BP-4354-01	8	-1.4177	-0.9214
TCGA-BP-4797-01	5	0.3796	0.185
TCGA-B0-4819-01	8	-0.9454	-0.7688
TCGA-CJ-4886-01	5	-0.2214	-0.5531
TCGA-CJ-4881-01	11	-0.6826	1.8286
TCGA-AK-3445-01	0	-0.6716	2.2168
TCGA-AK-3450-01	0	0.3298	-0.0293
TCGA-B0-4703-01	0	-1.0414	0.3244
TCGA-B0-4845-01	0	0.0385	-0.2694
TCGA-BP-4355-01	0	-0.6339	-0.6859
TCGA-BP-4759-01	0	0.7032	2.1987
TCGA-BP-4777-01	0	0.1802	0.1337
TCGA-BP-4789-01	0	-0.1563	-0.9103
TCGA-CJ-4872-01	0	-0.6639	1.1519

## Sheet: F
R value	p value (-log 10)
0.237337	6.14086
0.220796	5.37572
0.217989	5.25104
0.214945	5.11862
0.211934	4.96658
0.210408	4.92445
0.209831	4.89963
0.209734	4.88606
0.20781	4.8041
0.20568	4.72584
0.204661	4.65365
0.204285	4.63827
0.201671	4.56067
0.201101	4.50031
0.200323	4.50585
0.199427	4.4698
0.199168	4.45967
0.196545	4.33724
0.196511	4.3536
0.196267	4.31695
0.194345	4.26841
0.193792	4.24642
0.193625	4.22257
0.193601	4.22185
0.193236	4.20761
0.19252	4.19723
0.190464	4.11748
0.189693	4.08831
0.189501	4.08092
0.189161	4.06753
0.188997	4.06148
0.188843	4.04721
0.188451	4.04048
0.188386	4.0381
0.187636	4.00966
0.18649	3.96647
0.186429	3.96418
0.185348	3.91554
0.185305	3.92198
0.185038	3.91199
0.184651	3.89753
0.184485	3.89137
0.184087	3.87652
0.183262	3.82226
0.183113	3.84041
0.182908	3.83283
0.182873	3.81582
0.182164	3.80538
0.181478	3.76468
0.181406	3.75435
0.180466	3.74311
0.179699	3.71521
0.179123	3.69428
0.178871	3.68516
0.178871	3.68516
0.178348	3.65133
0.178336	3.65835
0.178288	3.66411
0.177395	3.63198
0.1773	3.62855
0.176612	3.60391
0.176468	3.59878
0.176366	3.59512
0.175955	3.58046
0.175654	3.55524
0.175577	3.55977
0.175411	3.56111
0.175149	3.55181
0.17498	3.54583
0.174726	3.51526
0.174339	3.52316
0.173985	3.51066
0.173944	3.47359
0.173526	3.49451
0.173518	3.49424
0.173414	3.49059
0.173324	3.4591
0.173203	3.43367
0.173106	3.44445
0.173057	3.47804
0.17305	3.4778
0.172751	3.46734
0.172744	3.46708
0.172528	3.45252
0.172356	3.43252
0.172304	3.41669
0.1721	3.44459
0.171996	3.44096
0.171736	3.42496
0.171236	3.38683
0.171089	3.40941
0.170889	3.38182
0.17072	3.39664
0.170588	3.39207
0.170467	3.38787
0.170406	3.35834
0.170126	3.3761
0.170126	3.37609
0.169784	3.36429
0.169733	3.34216
0.169619	3.35183
0.169407	3.35134
0.16935	3.34938
0.168909	3.33426
0.168704	3.32721
0.168588	3.32325
0.168392	3.26965
0.16836	3.29538
0.167815	3.29687
0.167694	3.29274
0.167389	3.28236
0.167181	3.26868
0.166789	3.24227
0.166786	3.2619
0.166601	3.25563
0.16631	3.24579
0.166166	3.24095
0.166056	3.23725
0.165801	3.22865
0.165795	3.19592
0.16569	3.22489
0.165437	3.21638
0.165412	3.20907
0.165228	3.20935
0.16522	3.18325
0.165213	3.15716
0.164981	3.20108
0.164966	3.20057
0.164883	3.19779
0.164659	3.16462
0.164382	3.18104
0.164373	3.18072
0.164109	3.12725
0.164048	3.16986
0.163842	3.16299
0.163751	3.15362
0.16359	3.1356
0.163462	3.15036
0.163357	3.14689
0.163351	3.14665
0.163173	3.11551
0.162894	3.11266
0.162736	3.12628
0.162693	3.12485
0.162605	3.12193
0.162539	3.10098
0.162508	3.11872
0.162369	3.11414
0.162278	3.1049
0.162198	3.10849
0.161797	3.07664
0.161783	3.0948
0.161765	3.09423
0.161611	3.08917
0.16158	3.08814
0.161457	3.01603
0.161352	3.08063
0.161334	3.08005
0.161313	3.07936
0.161153	3.07411
0.16115	3.074
0.161103	3.07247
0.161071	3.05293
0.160782	3.06194
0.160554	3.0545
0.160526	3.05357
0.160518	3.05329
0.160262	3.04494
0.15991	3.03346
0.159804	3.03003
0.159649	3.02496
0.159638	3.02462
0.159371	2.99782
0.159283	3.01308
0.159276	3.01286
0.159245	3.01185
0.159211	3.00472
0.159149	3.00872
0.159094	3.00694
0.159032	3.00495
0.159028	3.0048
0.158972	3.00298
0.158836	2.99858
0.158715	2.99469
0.158643	2.98637
0.158638	2.99218
0.158624	2.99174
0.158594	2.99077
0.158396	2.9784
0.158317	2.9818
0.158271	2.98032
0.158195	2.97788
0.158081	2.95639
0.158046	2.97307
0.157764	2.91663
0.157548	2.95114
0.157477	2.93707
0.157302	2.93737
0.157298	2.93137
0.15723	2.94684
0.157014	2.93991
0.156978	2.93877
0.156792	2.93282
0.156781	2.93245
0.156652	2.92834
0.156558	2.92532
0.156469	2.92248
0.156459	2.88136
0.156057	2.82809
0.155863	2.90318
0.155769	2.90018
0.155737	2.89915
0.155666	2.89688
0.155663	2.89104
0.155615	2.87222
0.155502	2.8917
0.155469	2.89063
0.155441	2.87825
0.155239	2.86612
0.155147	2.88043
0.155041	2.85989
0.15478	2.86881
0.154656	2.86491
0.154642	2.86445
0.154635	2.86422
0.154511	2.86033
0.154477	2.85356
0.154383	2.85627
0.154357	2.85546
0.154352	2.85529
0.154341	2.85494
0.15426	2.8524
0.154121	2.84803
0.154102	2.84742
0.154083	2.84684
0.154067	2.84631
0.154043	2.83426
0.154003	2.84431
0.153986	2.84377
0.153969	2.84322
0.153903	2.82987
0.153706	2.83497
0.153695	2.82335
0.153644	2.83304
0.153613	2.83204
0.153525	2.82928
0.153501	2.8173
0.1535	2.82848
0.153403	2.80862
0.153321	2.82288
0.153245	2.8037
0.153221	2.81976
0.153189	2.81874
0.153038	2.81402
0.152937	2.81085
0.152885	2.80924
0.152814	2.80701
0.152568	2.79378
0.15235	2.79254
0.152258	2.78966
0.152246	2.78929
0.152193	2.78763
0.152191	2.78758
0.151977	2.76439
0.151868	2.77753
0.151762	2.75774
0.151739	2.77351
0.151572	2.76835
0.151519	2.76669
0.151389	2.76267
0.15133	2.76084
0.151323	2.76063
0.151105	2.75386
0.151022	2.75131
0.150642	2.73955
0.150555	2.73687
0.150497	2.7351
0.150484	2.70763
0.150472	2.73434
0.150331	2.71378
0.150298	2.72897
0.150255	2.71684
0.150151	2.72445
0.150123	2.70741
0.150004	2.71991
0.149694	2.71042
0.149684	2.70475
0.149635	2.70323
0.149621	2.70817
0.149546	2.70586
0.149544	2.6844
0.149506	2.70463
0.14945	2.70292
0.149399	2.70138
0.149391	2.67974
0.14938	2.70079
0.14933	2.69924
0.149263	2.69186
0.149213	2.69566
0.149211	2.69562
0.149127	2.69305
0.148968	2.68819
0.148939	2.682
0.148846	2.68446
0.148787	2.68266
0.148753	2.64982
0.148721	2.68065
0.14868	2.67941
0.14868	2.6794
0.148288	2.66746
0.148281	2.66723
0.148229	2.66565
0.148177	2.66407
0.148064	2.66064
0.147942	2.63597
0.147832	2.64837
0.147822	2.6376
0.147561	2.64017
0.147552	2.64513
0.147487	2.64317
0.147364	2.63944
0.147351	2.63905
0.147334	2.63851
0.147263	2.63637
0.147175	2.62333
0.14704	2.62964
0.146989	2.62811
0.146971	2.62757
0.146963	2.62733
0.146877	2.62473
0.146793	2.59636
0.146739	2.6154
0.146696	2.59346
0.146677	2.61869
0.146538	2.6145
0.146531	2.59884
0.146449	2.60669
0.146388	2.61001
0.146362	2.60921
0.146348	2.59851
0.146145	2.58732
0.146141	2.59232
0.146088	2.60098
0.146007	2.59855
0.145865	2.59431
0.14579	2.59205
0.145752	2.5909
0.145647	2.58777
0.145641	2.58759
0.145595	2.56584
0.145566	2.54973
0.145505	2.58351
0.145407	2.58061
0.14532	2.578
0.145271	2.57652
0.145242	2.56046
0.145134	2.57244
0.145009	2.56871
0.144991	2.54798
0.144948	2.56689
0.144825	2.56322
0.144786	2.56207
0.14478	2.56189
0.144779	2.56185
0.144696	2.54429
0.144656	2.55819
0.144554	2.55515
0.144504	2.53861
0.144485	2.55313
0.14442	2.55119
0.144404	2.55072
0.144362	2.54944
0.144146	2.54305
0.144066	2.54068
0.144047	2.52516
0.143982	2.53818
0.143969	2.53779
0.143942	2.537
0.1439	2.53078
0.14387	2.53486
0.143865	2.53471
0.143863	2.52968
0.143854	2.53441
0.143703	2.52991
0.143598	2.52682
0.143534	2.52492
0.143469	2.52301
0.143434	2.522
0.143354	2.51963
0.143289	2.51772
0.143213	2.51546
0.143213	2.49571
0.143167	2.51411
0.143163	2.51399
0.142996	2.49923
0.142993	2.50897
0.142973	2.50838
0.142925	2.49222
0.142865	2.49538
0.142815	2.50374
0.142769	2.50238
0.142693	2.50016
0.142667	2.4994
0.142573	2.49662
0.142571	2.47698
0.142519	2.49503
0.142473	2.49368
0.142453	2.48334
0.142425	2.49227
0.142408	2.49178
0.142291	2.47373
0.142242	2.4723
0.142219	2.47164
0.142074	2.46254
0.142053	2.48138
0.141962	2.47871
0.141928	2.47771
0.141871	2.47604
0.141837	2.47505
0.141833	2.47494
0.141812	2.47431
0.141582	2.46277
0.141389	2.43305
0.14137	2.46143
0.141364	2.45645
0.14136	2.46114
0.141332	2.46031
0.141099	2.45354
0.141042	2.45189
0.141022	2.45131
0.140999	2.45063
0.140942	2.44896
0.140803	2.44493
0.140714	2.44235
0.140621	2.43966
0.140584	2.43856
0.140463	2.43506
0.140417	2.43373
0.140251	2.42893
0.140233	2.42841
0.140146	2.42589
0.139971	2.42082
0.139934	2.41977
0.1399	2.41877
0.139898	2.41872
0.13986	2.41762
0.139825	2.41662
0.139793	2.41568
0.139742	2.4142
0.13966	2.41184
0.139555	2.39941
0.139465	2.40152
0.139439	2.40547
0.139357	2.40312
0.139325	2.38345
0.139286	2.40106
0.139273	2.40071
0.139126	2.37308
0.139074	2.39497
0.139061	2.38059
0.138938	2.37709
0.138914	2.39037
0.138898	2.38993
0.138897	2.38989
0.1386	2.38139
0.138545	2.37981
0.138531	2.37014
0.13849	2.37359
0.138444	2.37691
0.138426	2.3764
0.138268	2.36263
0.138239	2.37106
0.138158	2.35028
0.138153	2.35475
0.138094	2.3669
0.138092	2.35301
0.138061	2.35214
0.137923	2.36202
0.137859	2.36019
0.137849	2.33232
0.137814	2.35892
0.137765	2.35751
0.137725	2.35178
0.137619	2.35336
0.137601	2.35285
0.137589	2.34793
0.137483	2.34949
0.137479	2.34938
0.137479	2.34481
0.137467	2.34904
0.137459	2.34425
0.137341	2.34546
0.137297	2.34421
0.137277	2.34365
0.137187	2.34109
0.13693	2.32924
0.136907	2.33313
0.13686	2.32274
0.136858	2.32721
0.136849	2.33148
0.136789	2.3298
0.136632	2.32083
0.136556	2.3232
0.136471	2.32079
0.136429	2.31962
0.136376	2.31812
0.136098	2.31028
0.136061	2.30922
0.136035	2.30849
0.135964	2.3065
0.135954	2.30622
0.13592	2.30526
0.135868	2.30379
0.135867	2.30377
0.135848	2.29427
0.13581	2.30217
0.135794	2.30172
0.135762	2.28741
0.135679	2.29847
0.13566	2.29793
0.135655	2.29781
0.135568	2.29536
0.135441	2.29177
0.135342	2.28456
0.135197	2.23611
0.135124	2.27404
0.135027	2.28019
0.135008	2.27523
0.13488	2.27605
0.134821	2.2744
0.134771	2.27303
0.134732	2.25431
0.134687	2.27068
0.134601	2.26386
0.134569	2.26738
0.134488	2.25194
0.13447	2.26462
0.134468	2.26457
0.134408	2.26288
0.134401	2.26268
0.134346	2.248
0.134329	2.26069
0.13427	2.25903
0.134266	2.25891
0.134244	2.2583
0.134241	2.25823
0.134172	2.25632
0.134117	2.25478
0.133939	2.24983
0.133924	2.24941
0.13391	2.23596
0.133867	2.24783
0.133853	2.24743
0.133814	2.24635
0.133812	2.2463
0.133651	2.24183
0.133595	2.24026
0.133591	2.24015
0.133474	2.22391
0.133388	2.23454
0.133293	2.2319
0.133273	2.21838
0.133142	2.21479
0.13313	2.22737
0.133119	2.22708
0.133024	2.22445
0.132991	2.22354
0.132989	2.21058
0.132979	2.22321
0.132943	2.22222
0.132887	2.22066
0.132886	2.19486
0.132873	2.21598
0.13282	2.21883
0.132764	2.2087
0.132755	2.21704
0.132665	2.20171
0.132663	2.21449
0.132593	2.20828
0.132561	2.21168
0.132557	2.21157
0.132496	2.20562
0.132477	2.20508
0.132429	2.20803
0.132343	2.20567
0.132302	2.20029
0.132231	2.2026
0.132197	2.20166
0.132143	2.20018
0.132118	2.1527
0.131996	2.19189
0.131859	2.19238
0.131827	2.19149
0.131764	2.18978
0.131686	2.18763
0.131672	2.18724
0.13165	2.18664
0.131512	2.18287
0.131319	2.16918
0.1313	2.17707
0.131203	2.13244
0.131157	2.17315
0.131141	2.17272
0.131123	2.16804
0.131055	2.17038
0.131039	2.16994
0.131006	2.16904
0.130936	2.15041
0.130902	2.16621
0.130883	2.16569
0.130836	2.16442
0.13079	2.16314
0.130768	2.16254
0.130757	2.14974
0.130756	2.16222
0.130736	2.16167
0.130736	2.16167
0.130702	2.14826
0.130688	2.16038
0.130655	2.15947
0.130593	2.14531
0.130574	2.15726
0.130568	2.15711
0.130535	2.13958
0.13053	2.15608
0.130509	2.1555
0.130375	2.15185
0.13031	2.15011
0.130295	2.14554
0.130284	2.1494
0.130277	2.1285
0.130099	2.14437
0.130048	2.13474
0.130033	2.14259
0.129942	2.14012
0.129829	2.13706
0.129807	2.12413
0.129774	2.13556
0.129757	2.13512
0.129754	2.13503
0.129663	2.13258
0.129647	2.1116
0.129606	2.13103
0.129568	2.12999
0.129567	2.11766
0.129446	2.12669
0.129385	2.12506
0.129379	2.1249
0.129298	2.11863
0.129234	2.12098
0.129227	2.1208
0.129201	2.10785
0.129053	2.11204
0.128923	2.0923
0.128922	2.11259
0.128797	2.10921
0.128792	2.10908
0.128764	2.10832
0.128759	2.10819
0.128649	2.10524
0.128621	2.10449
0.128534	2.09004
0.128478	2.08045
0.128247	2.09444
0.128204	2.09331
0.128189	2.08085
0.128171	2.09243
0.128132	2.09138
0.128107	2.0907
0.128054	2.08928
0.128038	2.08887
0.128019	2.08835
0.128019	2.0723
0.127939	2.08621
0.127913	2.08553
0.127888	2.07285
0.127856	2.08399
0.127845	2.08371
0.12784	2.08356
0.12783	2.08331
0.127827	2.08321
0.127822	2.08309
0.12778	2.08197
0.127748	2.08111
0.127725	2.08049
0.127724	2.08048
0.127676	2.07918
0.12765	2.0785
0.127611	2.07747
0.127545	2.07569
0.127504	2.07062
0.127475	2.07382
0.127387	2.07148
0.127317	2.06962
0.127261	2.06812
0.127132	2.0647
0.127121	2.06442
0.127119	2.06436
0.127104	2.05207
0.127002	2.06125
0.126947	2.05979
0.126933	2.0594
0.126928	2.05138
0.126927	2.05927
0.126868	2.05769
0.126756	2.05473
0.126739	2.05427
0.126728	2.05397
0.126706	2.05338
0.126705	2.05337
0.126605	2.03893
0.126556	2.04943
0.126533	2.04881
0.126532	2.04878
0.126516	2.04837
0.126515	2.04832
0.126432	2.0383
0.126397	2.03345
0.126379	2.0369
0.126378	2.0447
0.126354	2.04016
0.126344	2.04382
0.12634	2.0437
0.12625	2.04131
0.126242	2.0411
0.126231	2.02909
0.126224	2.04064
0.126224	2.04062
0.126151	2.03871
0.126089	1.9197
0.126075	2.0367
0.12603	2.03551
0.126018	2.03518
0.125906	2.02447
0.125905	2.03221
0.125864	2.03112
0.125841	2.03054
0.125805	2.02958
0.125784	2.02902
0.125784	2.02513
0.125765	2.02853
0.125677	2.01458
0.125608	2.01276
0.125521	2.02211
0.125517	2.01039
0.125479	2.021
0.125451	2.02026
0.125448	2.01632
0.125433	2.0198
0.125341	2.01737
0.125332	2.01712
0.125287	2.01594
0.125226	2.01434
0.12516	2.01261
0.125152	1.99701
0.125102	2.01109
0.124999	2.00839
0.124954	2.00722
0.124953	2.00719
0.124901	2.00582
0.124886	1.96707
0.124828	2.00392
0.12482	2.00371
0.124787	2.00285
0.124737	1.99389
0.124685	2.00018
0.124592	1.99775
0.124572	1.99721
0.124549	1.99663
0.124522	1.99592
0.124511	1.99562
0.124443	1.99385
0.124408	1.99293
0.124315	1.99052
0.12429	1.98985
0.124284	1.96689
0.124249	1.98879
0.124237	1.9657
0.124125	1.98555
0.124056	1.98375
0.124034	1.98318
0.123994	1.98213
0.123985	1.98192
0.123973	1.97025
0.123934	1.98059
0.12393	1.98049
0.123867	1.97883
0.123859	1.97487
0.123822	1.96634
0.123816	1.9662
0.123751	1.96452
0.123652	1.97324
0.123627	1.97261
0.123601	1.97193
0.123526	1.95495
0.123455	1.96815
0.123325	1.96476
0.123312	1.96068
0.123249	1.94035
0.123245	1.96268
0.123185	1.96114
0.123179	1.96098
0.123164	1.9606
0.123148	1.96017
0.123101	1.94776
0.123092	1.95875
0.122973	1.95566
0.12292	1.95428
0.122919	1.95426
0.122875	1.94941
0.122871	1.93815
0.12286	1.94158
0.1228	1.95118
0.122769	1.95039
0.122688	1.94829
0.12264	1.94705
0.122596	1.9348
0.122521	1.944
0.122519	1.93655
0.122468	1.94262
0.122458	1.94237
0.122444	1.93092
0.122355	1.92863
0.122294	1.93815
0.122256	1.93718
0.122242	1.93314
0.122237	1.93667
0.122185	1.92429
0.122172	1.935
0.122159	1.92363
0.12213	1.93392
0.122032	1.92407
0.122025	1.93123
0.122001	1.93062
0.122001	1.93062
0.121979	1.93006
0.121943	1.92545
0.121935	1.92893
0.121835	1.92636
0.121835	1.92636
0.121752	1.92423
0.121743	1.92401
0.121725	1.92352
0.121719	1.92339
0.121651	1.92165
0.121598	1.90934
0.121574	1.90141
0.121573	1.91963
0.121566	1.91945
0.121535	1.91866
0.121488	1.91747
0.121462	1.91315
0.121448	1.91643
0.121425	1.79895
0.121419	1.91206
0.12139	1.91495
0.121374	1.90727
0.121368	1.91075
0.121335	1.90265
0.121328	1.91337
0.121303	1.91275
0.121245	1.91126
0.121201	1.91013
0.121196	1.89185
0.121184	1.90969
0.121146	1.90871
0.121138	1.90852
0.121088	1.90723
0.121062	1.90657
0.121044	1.90613
0.121041	1.90606
0.120957	1.9039
0.120956	1.90388
0.120918	1.90291
0.120903	1.90253
0.120903	1.90252
0.120676	1.89675
0.120668	1.89655
0.120633	1.89566
0.120602	1.89487
0.120599	1.88401
0.120576	1.89421
0.120571	1.89407
0.120555	1.89366
0.120551	1.89358
0.120547	1.89346
0.120538	1.89324
0.120515	1.89265
0.120427	1.89042
0.120405	1.88986
0.120348	1.88123
0.120333	1.88803
0.120268	1.88281
0.120267	1.88635
0.120239	1.88565
0.120232	1.88546
0.120231	1.8604
0.120228	1.88537
0.120228	1.88536
0.120189	1.85577
0.120182	1.88419
0.120153	1.88346
0.119971	1.87172
0.119941	1.87809
0.119933	1.8779
0.119933	1.86721
0.119924	1.87409
0.119911	1.87732
0.119901	1.87708
0.119889	1.85187
0.119785	1.87413
0.119704	1.85434
0.119664	1.86045
0.119634	1.87034
0.119628	1.87018
0.119617	1.8628
0.119567	1.85802
0.11953	1.86769
0.119478	1.85931
0.119415	1.86481
0.119396	1.86433
0.119346	1.86305
0.119291	1.86166
0.119199	1.85935
0.119167	1.85854
0.119148	1.85807
0.119117	1.85026
0.119099	1.85684
0.119054	1.85571
0.119007	1.85453
0.118968	1.84301
0.118964	1.85345
0.118876	1.83721
0.118852	1.85063
0.118848	1.85054
0.118778	1.84875
0.118767	1.8485
0.118694	1.83617
0.118599	1.84428
0.118581	1.84383
0.118556	1.8432
0.118519	1.84227
0.118438	1.84025
0.118431	1.84006
0.118424	1.83987
0.118415	1.83966
0.118387	1.83895
0.118284	1.83638
0.118215	1.83464
0.118171	1.83356
0.118154	1.83312
0.118108	1.83198
0.118052	1.83058
0.118045	1.83041
0.117988	1.82899
0.117983	1.82886
0.117978	1.81145
0.117913	1.8271
0.117903	1.81306
0.117884	1.82638
0.117862	1.82585
0.117839	1.82526
0.117786	1.82393
0.117732	1.8157
0.117722	1.82235
0.117716	1.81532
0.117712	1.82209
0.117703	1.82187
0.117689	1.81809
0.117644	1.8204
0.117532	1.81761
0.117498	1.81676
0.117496	1.81672
0.11743	1.81507
0.117406	1.81449
0.117332	1.80237
0.117305	1.81195
0.1173	1.81184
0.117295	1.79803
0.117293	1.80482
0.117274	1.80093
0.117269	1.81107
0.117252	1.81064
0.117245	1.81046
0.117239	1.81033
0.117231	1.80671
0.117188	1.80905
0.117132	1.80766
0.11711	1.80713
0.117099	1.80685
0.117074	1.80624
0.117022	1.80494
0.117017	1.78097
0.117009	1.79441
0.116971	1.80368
0.116969	1.79683
0.116958	1.80336
0.116942	1.79615
0.116888	1.80161
0.116878	1.80137
0.116854	1.79058
0.116843	1.79031
0.116837	1.80035
0.116832	1.80023
0.116764	1.79855
0.11676	1.79506
0.116748	1.78798
0.116734	1.79781
0.116733	1.79778
0.116679	1.79645
0.11667	1.78944
0.116636	1.79537
0.116625	1.79511
0.116567	1.77337
0.116514	1.79237
0.116478	1.78473
0.116467	1.78783
0.116464	1.79113
0.116436	1.78032
0.116406	1.7897
0.116317	1.78749
0.11631	1.78733
0.116295	1.78694
0.116272	1.77629
0.11623	1.78535
0.116229	1.77187
0.116188	1.77423
0.11611	1.78239
0.116098	1.7821
0.116076	1.78155
0.11607	1.78139
0.116011	1.77996
0.115999	1.77965
0.115975	1.77906
0.115944	1.76825
0.115921	1.77773
0.11592	1.7777
0.115912	1.77752
0.115901	1.77724
0.115892	1.77703
0.115883	1.7768
0.115872	1.76983
0.115835	1.77562
0.115825	1.77536
0.115817	1.77518
0.115815	1.77513
0.115812	1.77506
0.1158	1.76808
0.115772	1.77408
0.115771	1.77404
0.115719	1.77276
0.115687	1.77199
0.115683	1.77189
0.115665	1.77145
0.115664	1.76142
0.115636	1.77073
0.11563	1.77058
0.115612	1.77014
0.115577	1.76262
0.11555	1.76862
0.115533	1.76821
0.115527	1.76805
0.115519	1.74123
0.115457	1.76632
0.115446	1.76607
0.11542	1.76543
0.115345	1.7636
0.115345	1.75364
0.115329	1.75988
0.115286	1.76215
0.115256	1.76141
0.11523	1.76076
0.115171	1.75933
0.115163	1.75914
0.115161	1.75908
0.115107	1.74453
0.115072	1.7569
0.115037	1.75604
0.114996	1.75503
0.114974	1.75449
0.114895	1.74599
0.114881	1.74894
0.11487	1.75196
0.114774	1.74962
0.114766	1.74615
0.114742	1.73899
0.114633	1.74619
0.114627	1.74603
0.114556	1.7443
0.114515	1.73676
0.114454	1.72219
0.114454	1.7418
0.114422	1.72795
0.114387	1.71729
0.114353	1.73937
0.114322	1.71902
0.114292	1.73786
0.114257	1.73701
0.114246	1.73022
0.114199	1.73561
0.114144	1.73428
0.11411	1.73345
0.114087	1.72963
0.114042	1.73179
0.114018	1.73122
0.114012	1.73108
0.114009	1.72124
0.113967	1.72998
0.113927	1.72252
0.113913	1.72865
0.113846	1.72704
0.113806	1.72606
0.113801	1.72596
0.11376	1.71524
0.113737	1.7244
0.113662	1.72258
0.11356	1.72012
0.113549	1.71339
0.113511	1.71893
0.113497	1.71857
0.113455	1.71756
0.11341	1.70038
0.113393	1.71606
0.113358	1.7088
0.113351	1.71507
0.11334	1.71478
0.11332	1.69503
0.113318	1.71426
0.113312	1.71412
0.113312	1.71411
0.113276	1.69717
0.113238	1.71232
0.113226	1.70882
0.113203	1.71149
0.113145	1.70688
0.113139	1.70993
0.113114	1.69653
0.11301	1.70683
0.112997	1.70651
0.112984	1.70301
0.112974	1.70595
0.112971	1.6931
0.112953	1.69588
0.112953	1.70226
0.112921	1.70148
0.112901	1.70421
0.11289	1.70393
0.112802	1.68906
0.112772	1.7011
0.112772	1.7011
0.112768	1.701
0.112736	1.70022
0.112713	1.69967
0.112668	1.69858
0.11263	1.68815
0.112598	1.69692
0.11259	1.69672
0.112561	1.69601
0.112501	1.69457
0.112501	1.69456
0.112497	1.69449
0.11249	1.68798
0.112487	1.6879
0.112443	1.69319
0.11241	1.67972
0.11237	1.69144
0.112342	1.69076
0.112338	1.69066
0.112304	1.68986
0.112244	1.68842
0.112241	1.68833
0.112174	1.68674
0.112156	1.64524
0.112153	1.68623
0.112136	1.68582
0.112107	1.68197
0.112062	1.67775
0.112057	1.68394
0.112044	1.67417
0.111965	1.68173
0.111838	1.6787
0.111832	1.67541
0.111797	1.67772
0.111793	1.67762
0.111783	1.66169
0.111779	1.67728
0.111758	1.67678
0.111747	1.67024
0.111723	1.67595
0.111681	1.66556
0.111667	1.66834
0.111633	1.6738
0.111626	1.67363
0.11161	1.67325
0.111599	1.67297
0.111542	1.66538
0.111448	1.66937
0.111439	1.66917
0.111425	1.66884
0.111419	1.66868
0.111415	1.65924
0.111402	1.66206
0.111384	1.65852
0.111364	1.65804
0.111335	1.66668
0.1113	1.66586
0.111273	1.64655
0.111256	1.66481
0.111232	1.65802
0.111227	1.64547
0.111216	1.66385
0.111211	1.66373
0.111106	1.65504
0.111079	1.64201
0.111022	1.63446
0.110999	1.65869
0.110942	1.65734
0.110914	1.65668
0.110912	1.65663
0.110897	1.65627
0.110895	1.61599
0.110849	1.65513
0.110845	1.65503
0.11084	1.64566
0.110765	1.65313
0.110759	1.65301
0.110739	1.65253
0.110739	1.65253
0.110676	1.63563
0.110662	1.6507
0.110652	1.65047
0.110629	1.64993
0.110619	1.64969
0.110617	1.64963
0.110607	1.60935
0.110557	1.6482
0.110552	1.6481
0.110512	1.64715
0.110501	1.64688
0.110441	1.64548
0.11042	1.64497
0.110413	1.6356
0.110361	1.63745
0.110343	1.64315
0.110333	1.64291
0.110309	1.64235
0.110236	1.64062
0.11021	1.64001
0.110139	1.63222
0.110117	1.63782
0.110106	1.63756
0.110099	1.63433
0.110097	1.63734
0.110049	1.63621
0.110015	1.62321
0.110003	1.63512
0.109999	1.63502
0.109938	1.62752
0.109927	1.63334
0.109898	1.63264
0.10988	1.63223
0.109868	1.62282
0.109803	1.63041
0.109795	1.63023
0.109791	1.61495
0.109771	1.62965
0.109642	1.62662
0.10964	1.62657
0.109617	1.62602
0.109592	1.62543
0.109548	1.61533
0.109547	1.61229
0.109538	1.61512
0.109473	1.62265
0.109456	1.62226
0.10943	1.62163
0.109356	1.61989
0.109335	1.6194
0.109319	1.61602
0.109318	1.61899
0.1093	1.61858
0.109297	1.61851
0.109254	1.60847
0.109229	1.60489
0.109223	1.61377
0.10919	1.60998
0.109183	1.61583
0.109151	1.61208
0.109134	1.61468
0.10913	1.61459
0.109113	1.6142
0.109108	1.61408
0.109103	1.61397
0.109099	1.61386
0.109074	1.61328
0.109073	1.61326
0.109049	1.61271
0.109033	1.61231
0.109013	1.60287
0.108995	1.61143
0.10896	1.60162
0.108948	1.61033
0.108948	1.61033
0.10894	1.60716
0.10891	1.60944
0.108873	1.60858
0.108858	1.5843
0.108844	1.6079
0.108831	1.60759
0.108827	1.59853
0.108821	1.60735
0.108774	1.60626
0.10875	1.60571
0.108727	1.60516
0.108712	1.60482
0.108689	1.60429
0.108681	1.60409
0.108647	1.59436
0.108624	1.60275
0.108623	1.60273
0.108576	1.60163
0.108465	1.59904
0.108434	1.59832
0.108404	1.59764
0.108327	1.59583
0.108323	1.59574
0.108317	1.59561
0.108312	1.59548
0.108287	1.5949
0.108274	1.59461
0.108264	1.59437
0.108193	1.59271
0.108183	1.58953
0.108164	1.59203
0.108163	1.58611
0.108125	1.59113
0.108106	1.59069
0.10803	1.58892
0.108022	1.57989
0.107997	1.58815
0.107971	1.58755
0.107961	1.58731
0.10793	1.58661
0.107923	1.58644
0.107912	1.58618
0.107869	1.58225
0.107866	1.56451
0.107828	1.58423
0.107824	1.57532
0.107804	1.58368
0.107796	1.58349
0.107779	1.5831
0.107715	1.5816
0.107658	1.58028
0.107646	1.58
0.107642	1.57991
0.107637	1.56807
0.107631	1.57966
0.107577	1.57548
0.107556	1.57791
0.107555	1.57497
0.107529	1.5773
0.107483	1.57038
0.107461	1.54941
0.107451	1.57549
0.107396	1.57421
0.107394	1.57417
0.107393	1.56832
0.107386	1.57399
0.107374	1.57372
0.10736	1.56463
0.107337	1.57285
0.107325	1.57257
0.107318	1.57242
0.10728	1.57154
0.107273	1.57137
0.107253	1.57092
0.107242	1.57065
0.107236	1.57052
0.107171	1.5603
0.107171	1.56611
0.107156	1.56868
0.107123	1.56791
0.107065	1.56366
0.107063	1.55202
0.107053	1.53725
0.107037	1.55721
0.107027	1.56568
0.106994	1.56494
0.106946	1.56383
0.106912	1.56014
0.106899	1.56274
0.106876	1.5622
0.106869	1.55916
0.106814	1.56078
0.106752	1.54204
0.106746	1.55922
0.106652	1.55706
0.10665	1.557
0.106618	1.55626
0.106603	1.55592
0.106589	1.55561
0.106512	1.53945
0.106454	1.5525
0.106423	1.55179
0.106385	1.55092
0.106352	1.55015
0.106351	1.55012
0.106327	1.54958
0.106316	1.54934
0.106311	1.54063
0.106253	1.502
0.106206	1.54682
0.10619	1.54643
0.106154	1.54561
0.106149	1.54549
0.106091	1.54416
0.106087	1.54407
0.106061	1.54348
0.106057	1.54339
0.106038	1.5401
0.105922	1.5403
0.105866	1.51055
0.10584	1.53842
0.105837	1.53834
0.105818	1.53791
0.105791	1.52878
0.105766	1.51969
0.105761	1.49965
0.105716	1.53558
0.105704	1.52963
0.105686	1.53491
0.10562	1.5334
0.105604	1.53302
0.105593	1.52995
0.105587	1.53264
0.10558	1.53247
0.10555	1.53179
0.105528	1.5313
0.105508	1.53083
0.105497	1.53058
0.105341	1.52702
0.105218	1.52423
0.105188	1.52354
0.105176	1.52047
0.105156	1.52282
0.105126	1.51372
0.105117	1.52194
0.105112	1.51341
0.105068	1.51241
0.105043	1.52025
0.104997	1.47429
0.104994	1.51354
0.10499	1.51624
0.104989	1.51903
0.104981	1.51604
0.104981	1.51324
0.104977	1.51875
0.104943	1.51797
0.104942	1.51795
0.104869	1.5163
0.104862	1.51614
0.104862	1.51614
0.104738	1.51332
0.104705	1.51257
0.104671	1.51181
0.104635	1.51098
0.104624	1.50795
0.104624	1.51074
0.104612	1.51046
0.104571	1.50953
0.104551	1.47845
0.104518	1.50557
0.104499	1.50236
0.104404	1.50576
0.104369	1.49942
0.10432	1.50387
0.104312	1.50368
0.104297	1.50335
0.104272	1.50001
0.104235	1.50194
0.10423	1.50182
0.104206	1.50129
0.104185	1.50081
0.104164	1.50034
0.10415	1.50002
0.104118	1.49929
0.104111	1.49914
0.104096	1.4988
0.104083	1.49851
0.104021	1.4971
0.103987	1.49635
0.103986	1.4908
0.103923	1.4949
0.10391	1.49461
0.103899	1.48885
0.10389	1.49415
0.103885	1.49128
0.10388	1.49392
0.103843	1.47934
0.103805	1.48124
0.103787	1.49182
0.103774	1.49154
0.103749	1.49097
0.103742	1.49082
0.103738	1.48525
0.10373	1.49054
0.103713	1.49017
0.103695	1.48976
0.103644	1.48862
0.103639	1.48029
0.103625	1.47723
0.103614	1.47426
0.103554	1.48659
0.103511	1.48562
0.103457	1.48441
0.103448	1.48421
0.103437	1.48397
0.103405	1.48325
0.103375	1.48257
0.103361	1.48226
0.103323	1.4814
0.103307	1.48105
0.103257	1.47992
0.103243	1.4796
0.103237	1.47948
0.103235	1.47943
0.103227	1.47381
0.103201	1.47867
0.103186	1.47832
0.103156	1.47767
0.103087	1.46798
0.103086	1.47609
0.102976	1.47364
0.10294	1.47282
0.102848	1.44642
0.102842	1.47062
0.102803	1.46976
0.102761	1.46881
0.102676	1.45884
0.102629	1.45779
0.102622	1.46572
0.102618	1.46294
0.102613	1.46551
0.102612	1.46012
0.102566	1.46445
0.102535	1.46376
0.10247	1.46233
0.10245	1.46189
0.102437	1.45622
0.102412	1.46104
0.102402	1.46082
0.102382	1.46035
0.102346	1.45956
0.10234	1.45943
0.102312	1.4588
0.10224	1.44652
0.102236	1.44642
0.102207	1.45646
0.102181	1.45589
0.102177	1.4558
0.102158	1.4527
0.102143	1.45503
0.102124	1.45461
0.102111	1.45433
0.102106	1.43554
0.102096	1.45399
0.102073	1.4455
0.102061	1.45322
0.102028	1.4525
0.101911	1.44988
0.10186	1.43546
0.101852	1.44859
0.101844	1.44841
0.10184	1.44565
0.101827	1.44803
0.101823	1.44794
0.101807	1.44759
0.101782	1.43376
0.101722	1.44569
0.101711	1.44546
0.101687	1.44491
0.101668	1.4445
0.10159	1.44277
0.101569	1.44232
0.101543	1.44173
0.101523	1.42807
0.10152	1.44122
0.101507	1.44094
0.10149	1.43793
0.101466	1.44003
0.101453	1.4107
0.101447	1.40793
0.101423	1.43908
0.101361	1.43771
0.101353	1.43754
0.101351	1.42958
0.101308	1.43652
0.101305	1.42067
0.101304	1.43644
0.101297	1.43629
0.101283	1.43599
0.101282	1.43596
0.101261	1.42762
0.101234	1.43489
0.10122	1.43196
0.101155	1.42267
0.101137	1.43274
0.101121	1.4324
0.101108	1.42424
0.101105	1.41894
0.101099	1.43192
0.101098	1.4319
0.101072	1.42871
0.101069	1.43126
0.101042	1.43066
0.101031	1.43041
0.101009	1.42993
0.101002	1.42978
0.100973	1.42129
0.100937	1.42835
0.100928	1.42814
0.100906	1.42765
0.100877	1.4192
0.100856	1.42657
0.100825	1.42589
0.100813	1.42562
0.100752	1.42426
0.100738	1.42396
0.100731	1.42382
0.100721	1.42358
0.100714	1.42344
0.100695	1.42302
0.100693	1.42298
0.100667	1.4146
0.100661	1.42228
0.100653	1.42209
0.100623	1.42144
0.100613	1.42121
0.100594	1.36609
0.10052	1.41918
0.100509	1.41893
0.100504	1.41364
0.100493	1.40041
0.100479	1.41828
0.100444	1.40454
0.100439	1.4148
0.100393	1.41638
0.100374	1.41597
0.100323	1.41486
0.100281	1.41392
0.100277	1.41126
0.100252	1.4133
0.100216	1.4125
0.100194	1.41201
0.100184	1.40406
0.100146	1.41098
0.100111	1.41019
0.100052	1.4089
0.0999965	1.4077
0.0999741	1.40207
0.0999418	1.4065
0.0999281	1.4062
0.0999174	1.40597
0.0998882	1.40533
0.0998777	1.40254
0.0998589	1.40469
0.0998012	1.40343
0.0997838	1.40305
0.0997578	1.40248
0.0997439	1.40218
0.0997208	1.40167
0.0996896	1.40099
0.0996887	1.40097
0.0996599	1.39012
0.099591	1.39884
0.0995239	1.39738
0.0995076	1.39702
0.099495	1.39165
0.0994712	1.38349
0.0994585	1.39341
0.0994275	1.39528
0.0994207	1.39513
0.0994048	1.39478
0.0993683	1.39399
0.0993682	1.39399
0.0993509	1.39361
0.0993214	1.38789
0.099299	1.39248
0.0992912	1.37707
0.0992378	1.38354
0.099237	1.39113
0.0992138	1.38302
0.0991487	1.38162
0.0991483	1.38921
0.099102	1.3882
0.0990728	1.38756
0.0990346	1.38673
0.0990257	1.38654
0.0989943	1.38586
0.0989442	1.38477
0.0988647	1.38305
0.0988251	1.38219
0.0987948	1.38153
0.0987942	1.38152
0.0987742	1.37857
0.0987704	1.37346
0.0987666	1.37086
0.0987197	1.37991
0.0987102	1.3797
0.0987	1.37446
0.0986865	1.37919
0.0986731	1.3789
0.0986224	1.3778
0.0985859	1.37701
0.0985664	1.37659
0.0985595	1.37143
0.0985206	1.3756
0.0985195	1.37557
0.0984923	1.37498
0.0984849	1.37482
0.0984721	1.36704
0.0984568	1.37172
0.0983633	1.3722
0.0982886	1.36809
0.0982845	1.3705
0.0982764	1.37032
0.0982708	1.36522
0.0982562	1.36989
0.0982129	1.36895
0.0982013	1.3687
0.098189	1.36844
0.0981854	1.3584
0.0981385	1.36735
0.0981353	1.36728
0.0981318	1.3672
0.0981238	1.36703
0.0980961	1.354
0.0980787	1.36606
0.0980719	1.36591
0.0980675	1.36582
0.098037	1.3602
0.0979997	1.35443
0.0979947	1.36177
0.0979769	1.36387
0.0979423	1.3532
0.0979409	1.35813
0.0979282	1.35786
0.0978789	1.36176
0.097846	1.36105
0.0978347	1.3608
0.0978272	1.36064
0.0978126	1.35291
0.0977986	1.36003
0.0977549	1.35909
0.0977495	1.3565
0.0977359	1.35374
0.0977157	1.35825
0.0977092	1.3581
0.0976886	1.35766
0.0976659	1.35718
0.0976566	1.35698
0.0975967	1.35569
0.0975704	1.34774
0.0975374	1.35442
0.0974947	1.3535
0.0974742	1.35306
0.0974562	1.34776
0.0974452	1.35244
0.0974247	1.352
0.0974226	1.34459
0.0974216	1.34702
0.0974145	1.35178
0.0973823	1.35109
0.0973685	1.35079
0.0973463	1.35032
0.0973373	1.35013
0.0973317	1.34756
0.0972964	1.34925
0.0972921	1.34916
0.0972848	1.349
0.0972685	1.34865
0.0972532	1.34832
0.0972165	1.34754
0.0971868	1.3469
0.0971537	1.3462
0.0971526	1.34617
0.0971451	1.33868
0.0971102	1.34527
0.0970721	1.34445
0.0970617	1.34423
0.097053	1.3416
0.097043	1.34383
0.097042	1.34381
0.0970284	1.33376
0.0970182	1.3433
0.0969746	1.3375
0.0969717	1.34231
0.096953	1.3419
0.0969349	1.30739
0.0969179	1.33386
0.096886	1.33804
0.0968607	1.33994
0.0968484	1.33967
0.096842	1.33953
0.096829	1.33683
0.0967811	1.33824
0.0967654	1.3379
0.0967606	1.3378
0.0967555	1.33769
0.0967374	1.3373
0.0967172	1.30288
0.0966451	1.33534
0.0966402	1.33039
0.0965634	1.3336
0.0965464	1.33323
0.0965144	1.33255
0.0965053	1.32511
0.0964772	1.32693
0.0964391	1.33095
0.0964331	1.33082
0.0964278	1.3283
0.09641	1.32551
0.0963993	1.3301
0.0963824	1.32974
0.096341	1.32646
0.0963375	1.31916
0.0963279	1.32859
0.0963246	1.32852
0.0962783	1.32753
0.096258	1.31989
0.0962453	1.32202
0.096211	1.3213
0.0962038	1.32595
0.096171	1.32525
0.0961618	1.28899
0.0961483	1.32477
0.096142	1.32464
0.0961361	1.32451
0.0961091	1.32394
0.0961062	1.32388
0.0961058	1.32387
0.0960945	1.31164
0.0960898	1.32353
0.0960785	1.32329
0.0960461	1.3226
0.0960349	1.32236
0.0960303	1.32227
0.0960209	1.3053
0.0960173	1.32199
0.0960163	1.31479
0.0959453	1.32047
0.095905	1.31961
0.0959036	1.31958
0.0958997	1.3195
0.0958816	1.31912
0.0958779	1.31904
0.0958682	1.31167
0.0958674	1.31882
0.0958318	1.31806
0.0958033	1.31031
0.0957964	1.31731
0.0957831	1.31703
0.0957497	1.31632
0.0957263	1.31583
0.0957252	1.31581
0.0957234	1.31577
0.0956991	1.31525
0.0956677	1.30983
0.0956566	1.31435
0.0956557	1.31434
0.095641	1.31402
0.0956387	1.31398
0.0955872	1.31289
0.0955491	1.31208
0.0955411	1.30954
0.0955306	1.30695
0.0954822	1.31067
0.0954815	1.31066
0.0954675	1.29376
0.0954489	1.30997
0.0954382	1.30974
0.0954215	1.30939
0.0954196	1.30935
0.0954194	1.30934
0.0954125	1.3092
0.0954091	1.30913
0.0954079	1.3091
0.0953997	1.30893
0.0953832	1.29438
0.0953608	1.30811
0.0953473	1.30546
0.0953161	1.30716
0.0953117	1.30707
0.0953058	1.30695
0.0952506	1.30578
0.0952096	1.30492
0.0952037	1.29536
0.0951916	1.30454
0.0951661	1.30401
0.0951579	1.30383
0.0951483	1.30363
0.0951468	1.3036
0.0951339	1.28447
0.0951206	1.30305
0.0950824	1.30224
0.0950724	1.30203
0.0950522	1.30161
0.0950487	1.30153
0.0949884	1.30027
0.0949431	1.29931
0.0948712	1.2978
0.0948594	1.29755
0.0948462	1.29493
0.0947771	1.29582
0.0947629	1.29553
0.0947216	1.28765
0.0947171	1.29456
0.0947144	1.29451
0.0947095	1.29441
0.0947013	1.29423
0.0946884	1.2776
0.0946368	1.28354
0.0945953	1.29201
0.094521	1.29045
0.0945003	1.29002
0.0944562	1.26114
0.0944336	1.28862
0.0944326	1.26999
0.0944203	1.27904
0.0943879	1.28767
0.0943687	1.28726
0.0943526	1.28693
0.0943451	1.28677
0.0943423	1.28671
0.0943353	1.28656
0.0943141	1.28612
0.0942986	1.2858
0.0942893	1.27401
0.0942879	1.28557
0.0942354	1.28448
0.0942243	1.2773
0.0942227	1.2819
0.094175	1.28321
0.0941614	1.28293
0.094151	1.28271
0.0941267	1.26138
0.0941228	1.28212
0.0941195	1.28205
0.0940906	1.27452
0.0940259	1.2801
0.0940176	1.27993
0.0940144	1.27986
0.0939518	1.27395
0.0939372	1.27825
0.0939344	1.27589
0.0939091	1.27766
0.0939079	1.27764
0.0939079	1.27303
0.0938979	1.27743
0.093891	1.27038
0.0938545	1.27652
0.093847	1.27177
0.0938335	1.27609
0.0938089	1.27328
0.093807	1.26864
0.0938043	1.27548
0.0937997	1.25238
0.0937886	1.27515
0.0937741	1.27026
0.093742	1.27418
0.0937294	1.27392
0.0937286	1.27161
0.0937185	1.26681
0.0937107	1.27353
0.0936894	1.27309
0.093687	1.27304
0.0936669	1.27262
0.0936659	1.2726
0.0936563	1.26552
0.093636	1.27198
0.0936359	1.26968
0.093629	1.27183
0.09362	1.26477
0.0935905	1.27103
0.0935586	1.26579
0.0935316	1.26523
0.0934904	1.26895
0.093477	1.26639
0.09347	1.25482
0.0934525	1.26816
0.09343	1.26769
0.0934297	1.26769
0.0934243	1.26758
0.0934144	1.26737
0.0933972	1.26701
0.0933879	1.26682
0.0933776	1.26661
0.0933722	1.26649
[truncated: 16,999 more rows]

## Sheet: G
ASNS
Low	High
4.93427	2.45266
2.08902	1.53201
2.66491	2.42691
0.903226	0.588298
1.45116	3.08122
1.86382	10.8571
1.63743	7.64969
1.07495	6.05517
1.29893	1.25294
8.79321	2.2006
2.57143	1.73247
3.51462	1.04012
3.71557	1.60271
2.18941	2.18933
1.55154	1.34054
2.84422	1.00611
1.15946	2.19574
1.12218	1.54685
1.19615	2.31605
2.1789	1.4173
2.29569	1.42489
2.21583	1.01471
1.64	1.55025
3.03594	1.57119
1.08783	1.99197
1.56071	1.02679
2.35305	1.76433
0.976898	1.32518
2.50342	3.81973
6.70201	1.7191
1.2928	1.22951
5.15584	2.28515
1.18395	1.65086
1.34795	1.64668
1.28326	7.55381
2.0906	1.76781
1.47899	4.32222
1.82272	3.38914
1.61622	1.48214
1.99761	1.1468
0.862115	2.16043
1.35891	1.225
1.48896	0.733871
1.30382	1.50489
1.58665	4.21019
1.45914	2.07243
2.62664	1.91511
1.29158	7.80303
1.28625	6.08333
3.34375	4.872
7.03804	3.31298
2.28212	1.5182
1.05405	0.621622
1.76471	2.65112
1.47128	7.76257
1.50679	1.62461
1.54932	1.14894
3.14628	3.5124
2.61591	1.57721
1.02142	3.92593
1.28147	6.92922
3.96243	1.53058
2.27749	3.90959
1.26023	1.2459
3.38176	1.56931
2.30175	1.35499
0.73619	3.24145
1.11131	3.84507
3.37283	1.22644
1.14687	1.52849
2.40234	1.93488
1.54197	6.90289
1.7856	1.74933
0.902475	1.2057
1.32187	1.71941
2.2233	5.33399
3.79026	3.1421
1.90927	3.28765
1.14858	3.84354
0.543353	4.03902
2.80263	2.58787
1.05473	1.68409
0.764298	4.15196
1.36217	3.58371
4.61938	2.7351
0.73163	2.74419
1.46843	3.65789
2.897	0.830428
2.14475	2.91264
0.979858	2.05776
0.119195	1.22062
2.20401	1.35783
1.04242	1.13221
3.41042	1.39446
1.29225	14.0155
2.53061	1.97025
1.47357	1.40874
2.68362	3.82105
2.07358	3.5587
1.1768	2.44133
0.819129	1.59823
1.64509	1.51339
2.30754	1.31
1.18663	3.625
2.02769	6.17537
1.60356	1.05256
2.27316	1.7425
1.23935	1.60127
1.63653	1.7265
1.46753	1.1907
1.30884	2.51712
1.15524	1.6973
1.58567	1.43182
2.33954	1.38247
1.57413	1.35886
1.26782	2.62432
0.883721	2.58234
0.792804	4.01786
1.49696	3.65581
2.82249	1.51885
0.637339	3.78554
2.9186	3.00914
3.3359	5.42675
2.39594	3.84127
1.1159	3.01788
0.875168	1.21739
0.738873	6.83314
3.36715	1.23619
1.56593	1.70415
1.46212	1.78799
0.847764	1.26611
5.68052	7.26306
3.29216	6.76506
2.3841	1.63563
0.737202	1.46897
3.18386	1.728
2.12261	1.55632
2.10081	2.82519
0.822248	1.43702
0.98482	3.89946
1.5518	10.4523
2.41246	11.7462
1.62656	3.00525
4.08059	4.16865
1.25083	5.43897
3.39306	7.00249
1.43355	2.2722
1.26655	1.85392

## Sheet: H
FC (log 2)	p value (-log 10)
5.76727	2.18208
4.59462	2.19642
4.35776	2.45915
4.27685	2.23589
3.46003	2.03961
3.11617	2.10699
2.88095	2.0878
2.62144	2.19347
2.58119	2.17754
2.5477	2.41755
2.47079	2.01513
2.32992	2.2376
2.29937	2.49076
2.20132	2.21154
2.18022	2.29316
2.03965	2.15344
1.99804	3.04787
1.98168	2.42615
1.969	2.00057
1.94735	2.64574
1.9433	2.22959
1.90811	2.33351
1.82464	2.16253
1.77876	2.10817
1.72548	2.18248
1.67707	2.10229
1.67579	2.59249
1.65803	2.32913
1.65512	2.009
1.6527	2.79575
1.61294	2.35413
1.61291	2.16217
1.58174	2.65257
1.56065	2.7514
1.54891	2.19771
1.54722	2.06484
1.54	3.33456
1.53988	2.24139
1.53445	2.15695
1.52308	2.01577
1.51778	2.05006
1.51527	2.17978
1.51026	2.2241
1.49886	2.64693
1.49434	2.13844
1.48731	3.05586
1.47751	2.05805
1.4644	2.25666
1.46273	2.25956
1.4616	2.0476
1.45818	2.59111
1.44667	2.21642
1.44143	2.05532
1.43933	2.14783
1.43856	2.3993
1.42717	2.33552
1.41698	2.38279
1.41293	2.30039
1.40928	2.13486
1.40915	2.31406
1.40478	2.00451
1.40341	2.12012
1.40291	2.79719
1.40228	2.32527
1.4014	3.46277
1.39621	2.4083
1.39579	2.77989
1.39254	2.8564
1.39201	2.29776
1.38998	2.31038
1.38987	2.60742
1.38807	3.04169
1.38724	2.90678
1.38518	2.54277
1.38434	2.08759
1.37844	2.13429
1.37695	2.28984
1.37566	2.30073
1.37456	3.35663
1.37353	3.0892
1.37241	2.65863
1.37203	2.85265
1.3684	2.02117
1.36576	2.03805
1.36176	2.08249
1.35902	2.08748
1.35639	2.1872
1.35385	2.29905
1.35198	2.03492
1.34645	2.05513
1.34614	2.95542
1.34347	2.44962
1.3416	2.21833
1.34144	3.41358
1.34067	2.0061
1.33745	2.27183
1.33654	2.0014
1.3355	2.34255
1.33408	2.26415
1.33191	2.53786
1.32959	2.42459
1.32894	2.1381
1.32389	2.1656
1.32278	2.80203
1.32062	2.93481
1.32017	2.62135
1.31575	2.47473
1.31496	2.16941
1.3148	2.046
1.31425	2.79218
1.31378	3.02885
1.31316	2.40767
1.31201	2.0481
1.31197	2.23062
1.31069	2.03633
1.30976	3.09802
1.30954	2.64885
1.30912	2.26521
1.30857	2.02461
1.30741	2.10864
1.30682	2.88765
1.30675	2.74861
1.3065	2.78532
1.30393	2.41443
1.30109	2.06689
1.30096	2.72636
1.29996	3.28222
1.29994	2.14708
1.29959	2.0163
1.2992	2.20237
1.29856	2.58829
1.29803	2.0239
1.29544	2.01258
1.29484	2.99525
1.29049	2.03204
1.28897	2.44222
1.28865	2.66634
1.28647	2.2886
1.28583	2.11259
1.2851	2.19572
1.28487	2.12581
1.28368	2.97069
1.28352	2.08853
1.28259	2.1384
1.28116	2.14801
1.28104	2.55705
1.28051	3.0572
1.27918	2.07778
1.27854	2.56868
1.27709	2.26756
1.27571	2.54266
1.27565	2.70921
1.27557	2.18173
1.27444	2.11996
1.27429	2.65961
1.27407	2.15723
1.2733	2.23153
1.27234	2.36157
1.26783	2.30122
1.26677	2.53038
1.26573	2.28214
1.26563	3.05352
1.2647	2.27725
1.26344	3.41095
1.26208	2.20112
1.26133	2.34205
1.26132	2.19412
1.26062	2.09765
1.26061	2.09579
1.26026	2.40289
1.25894	2.09626
1.25854	2.3015
1.25755	2.13858
1.25634	2.34632
1.25557	2.65498
1.25511	2.2392
1.25456	2.6891
1.25436	2.00386
1.25382	2.48482
1.253	2.26803
1.25166	4.39584
1.25122	3.38929
1.24976	2.60193
1.2493	2.17334
1.2491	2.43913
1.24906	2.20394
1.24788	2.17325
1.24782	2.28095
1.24725	3.12191
1.24676	2.01591
1.2459	2.57392
1.24532	2.39782
1.2451	2.22849
1.24414	2.42775
1.24395	2.17795
1.24328	2.54989
1.24276	2.76273
1.24254	2.9922
1.24121	2.27031
1.24121	2.03885
1.24115	2.48008
1.23973	2.10385
1.2362	2.22942
1.23611	2.13009
1.23546	2.06243
1.23328	2.24252
1.23321	2.46399
1.23238	2.24429
1.23183	2.21395
1.23116	2.32589
1.22614	2.31581
1.22603	2.84068
1.22524	2.34624
1.22489	2.03904
1.22314	2.14381
1.22302	2.68706
1.22249	2.20188
1.22213	2.64484
1.22116	2.09799
1.21856	2.00159
1.21674	2.05746
1.21639	2.26134
1.21622	2.74837
1.21612	2.32841
1.21608	2.49415
1.21605	2.54303
1.21566	2.25638
1.21563	2.46802
1.21491	2.03739
1.21389	2.36958
1.21387	2.16103
1.21311	2.83353
1.21306	2.21512
1.21303	2.16979
1.21293	2.21331
1.21283	2.09429
1.21205	2.29745
1.21184	2.43894
1.2116	2.4816
1.2111	2.07708
1.21077	2.33498
1.21031	2.30777
1.20935	2.36178
1.20865	2.08136
1.2086	2.64932
1.20838	2.04514
1.20749	2.80145
1.20684	2.00532
1.2067	2.51209
1.2063	2.00703
1.20363	2.20255
1.20359	2.00269
1.203	2.07143
1.20275	2.98022
1.20253	2.43268
1.20253	2.16122
1.20236	3.02451
1.20192	2.23676
1.20128	2.06333
1.20057	2.72647
1.19945	2.19922
1.19939	2.09255
1.19916	2.04742
1.19809	2.75363
1.19784	2.22515
1.19756	2.58478
1.19727	2.34186
1.19687	2.85963
1.19605	2.01348
1.19598	2.8337
1.19556	2.16778
1.19538	2.91667
1.19535	2.22345
1.19534	2.25705
1.19526	2.41874
1.19484	2.88801
1.19317	2.0066
1.19289	2.07597
1.19276	2.21523
1.19159	2.29333
1.19138	2.15882
1.19129	2.08989
1.19088	2.04306
1.18899	2.54127
1.18881	2.015
1.18721	3.54568
1.18709	2.26254
1.18687	2.17936
1.18543	2.24719
1.18538	2.159
1.18454	2.50991
1.18359	2.47929
1.18322	2.12036
1.18298	2.64772
1.18271	2.4391
1.18232	2.01809
1.18163	2.47522
1.18123	2.13515
1.18104	2.19572
1.18078	2.61976
1.18059	2.3115
1.17923	3.31387
1.17911	2.11204
1.17803	2.65379
1.17786	2.17856
1.17761	2.16166
1.17756	2.0669
1.17731	2.18643
1.17707	2.35832
1.17695	2.10169
1.17655	2.14256
1.17622	2.40958
1.17536	2.39058
1.17525	2.13976
1.17413	2.30256
1.17334	2.32566
1.17239	2.38615
1.1723	2.09668
1.17152	2.23085
1.1701	3.04203
1.16999	2.31691
1.16911	2.05834
1.16792	2.0045
1.16704	2.15087
1.16615	2.26828
1.16586	2.06104
1.16537	2.38016
1.16486	2.36721
1.16451	2.02136
1.16365	2.12639
1.16349	2.34463
1.16168	3.15846
1.16091	2.59598
1.16073	2.38073
1.16031	2.18746
1.16006	2.28737
1.15914	2.93306
1.15906	2.22057
1.15807	2.2706
1.15798	2.03891
1.15778	2.61149
1.15621	2.0579
1.15477	2.03811
1.15474	2.2495
1.15354	2.19024
1.15263	2.1176
1.15243	2.02535
1.15215	2.02165
1.15167	2.25828
1.15096	2.36249
1.14709	2.62068
1.14699	2.22391
1.14596	2.00367
1.14563	2.42661
1.14477	2.65917
1.14472	2.059
1.1446	2.61707
1.14408	2.15086
1.14216	2.24357
1.13706	2.10805
1.13694	2.10933
1.13616	2.82719
1.13615	2.19142
1.1359	2.36943
1.13437	2.06327
1.13309	2.27408
1.13128	2.38116
1.13112	2.00736
1.12982	2.10058
1.1248	2.1467
1.12222	2.14544
1.12013	2.26476
1.11813	2.20029
1.11592	2.27861
1.11457	2.337
1.11227	2.03634
1.11188	2.22296
1.11056	2.64414
0.921313	2.12718
0.915116	2.09748
0.912677	2.20235
0.911952	2.29855
0.910976	2.09291
0.91019	2.74574
0.909722	2.17674
0.909375	2.03264
0.907785	2.07375
0.906942	2.30255
0.904274	2.23605
0.903924	2.89294
0.903093	2.13406
0.902321	2.03198
0.898652	2.39323
0.896769	2.29322
0.895632	2.33597
0.895118	2.15519
0.890491	2.02299
0.889061	2.95737
0.888897	2.05069
0.887893	2.25125
0.887691	2.45783
0.887217	2.42067
0.886708	2.34216
0.885704	2.40644
0.885629	2.3393
0.883014	2.61773
0.883005	2.16043
0.881918	2.70313
0.881595	2.12188
0.881342	2.52382
0.880271	2.4286
0.880164	2.4303
0.879676	3.60367
0.879142	2.50948
0.878948	2.32575
0.878056	3.08642
0.876304	2.32391
0.876116	3.18934
0.876074	2.35855
0.875886	2.52168
0.875193	2.00583
0.874999	2.80308
0.874737	2.91768
0.87462	2.33799
0.874365	2.02982
0.874009	2.89842
0.873853	2.73255
0.873782	2.23793
0.873092	2.13117
0.872877	2.93543
0.871999	2.03713
0.871319	2.28995
0.870907	2.00686
0.870621	2.0341
0.870548	2.70635
0.870104	2.37817
0.869936	2.40937
0.869845	2.26326
0.869707	2.39345
0.869305	3.34006
0.86889	2.98381
0.868816	2.64165
0.868347	2.45372
0.86814	2.26034
0.867976	2.1761
0.867796	2.22374
0.867692	2.26427
0.867506	2.11808
0.866953	2.14498
0.86641	3.06752
0.866208	2.17612
0.863798	2.03309
0.863534	2.05152
0.863269	2.88899
0.863107	2.5649
0.862662	2.37204
0.861613	3.76767
0.861593	2.19835
0.86123	2.75948
0.861187	2.64559
0.860557	2.27595
0.860405	2.12013
0.859265	2.85088
0.859258	2.12334
0.858712	2.12546
0.858689	2.01235
0.858591	2.69414
0.858298	2.83804
0.858097	3.79493
0.85793	2.59416
0.856734	2.56861
0.856569	2.16628
0.856383	3.4047
0.856218	2.56942
0.855641	2.37746
0.855489	2.80147
0.85518	3.82687
0.854863	3.53684
0.85439	2.44475
0.853589	3.50462
0.852898	2.06081
0.852203	4.26103
0.85217	2.51083
0.851935	2.54737
0.851406	3.28438
0.849905	2.65188
0.849451	2.15267
0.848916	2.48715
0.848308	2.59369
0.847783	2.05634
0.847117	2.56498
0.846649	2.36035
0.846311	2.00621
0.845789	2.04027
0.844992	2.20231
0.844606	2.03167
0.843861	2.38897
0.843258	2.77205
0.842838	2.14052
0.842612	2.05063
0.841929	2.66236
0.841333	2.33842
0.841247	2.3994
0.840658	3.83104
0.839674	3.40733
0.839352	2.30879
0.838811	2.96725
0.837825	2.76746
0.837622	2.05003
0.837567	3.0983
0.836963	2.12105
0.836403	4.14594
0.835899	2.07395
0.835051	2.17697
0.834854	2.38539
0.833964	2.02456
0.832601	2.24546
0.830623	3.25986
0.830429	2.12888
0.830195	2.24681
0.829722	2.17576
0.829698	3.0012
0.829689	2.25648
0.829513	2.86671
0.827255	2.30176
0.827141	2.48612
0.82575	3.17648
0.824863	3.41788
0.823953	2.30459
0.823501	3.1825
0.822088	3.95432
0.822033	2.64754
0.821323	2.4376
0.820752	2.33467
0.817823	2.49395
0.817678	2.51013
0.817336	2.41335
0.816068	2.58684
0.816027	2.80064
0.814125	2.89425
0.813763	2.16457
0.813589	2.38936
0.81345	3.38823
0.813158	2.44066
0.812598	2.99234
0.812305	2.22109
0.811706	2.6265
0.810983	2.74878
0.81072	2.11794
0.810411	2.12012
0.8102	2.85575
0.808284	2.80423
0.807962	2.29565
0.807699	3.05095
0.807614	2.16992
0.807119	3.13193
0.806849	2.0354
0.805559	2.00674
0.805233	2.8307
0.805225	2.77685
0.803414	3.51857
0.802989	2.00141
0.802807	2.01572
0.802145	3.06655
0.801955	3.70341
0.801731	4.06973
0.801378	2.14506
0.8008	2.18116
0.800313	3.03621
0.800033	3.46635
0.799643	2.29957
0.799557	3.37269
0.799451	2.04423
0.797255	2.32479
0.796265	2.84565
0.794879	2.11502
0.794242	2.14146
0.792955	2.13778
0.792262	2.48081
0.792011	2.13193
0.791707	2.90122
0.791256	3.19214
0.79079	2.25028
0.788834	2.51315
0.78855	2.19719
0.788128	2.5442
0.786789	3.38587
0.7848	3.32427
0.783667	3.12507
0.781925	5.62277
0.781404	2.7987
0.780781	2.23981
0.779063	2.78611
0.778624	2.89964
0.778143	3.19802
0.777831	2.12519
0.777047	2.61693
0.776913	2.57724
0.775913	3.78502
0.775855	2.2254
0.772156	2.23643
0.768236	4.17106
0.766677	2.36165
0.765097	3.31593
0.7624	2.12665
0.761606	2.41944
0.760502	2.55941
0.759165	2.57389
0.758988	2.43554
0.75797	2.71333
0.75646	6.5627
0.756431	3.12245
0.75402	4.01839
0.753213	2.33909
0.752908	2.58929
0.748615	2.21008
0.74578	2.36107
0.743139	2.95621
0.742334	3.34609
0.739025	2.0859
0.738013	3.42418
0.737949	2.30543
0.733658	3.90435
0.729989	2.30915
0.725557	3.29822
0.722688	3.82201
0.714624	3.56723
0.707071	3.39187
0.703954	3.52055
0.70222	3.0646
0.699713	2.75719
0.696703	2.91063
0.695865	3.49765
0.692725	2.7914
0.692439	2.14393
0.68544	2.29234
0.682285	2.56832
0.681804	2.07227
0.676449	2.01877
0.676389	2.28525
0.673557	3.23607
0.669928	2.43774
0.653618	2.16688
0.637924	2.02201
0.634701	4.6181
0.630786	3.47999
0.614398	3.8955
0.599226	2.3953
0.599105	2.55194
0.59433	2.23117
0.568558	2.26767
0.557424	2.12528
0.505509	2.27957
0.492887	2.04685
0.432904	2.3654
0.426083	2.80635
0.398152	2.46331
0.275269	2.27742
0.0917904	2.03295
0	2.03782
0.650369	1.99788
1.4767	1.99776
1.43764	1.99674
1.18832	1.99632
1.43755	1.99598
0.898072	1.99564
1.41305	1.99523
0.881646	1.99512
1.25659	1.99325
0.841698	1.99273
1.33326	1.9927
0.808447	1.9918
1.26329	1.99136
3.9886	1.99126
1.29553	1.9907
1.65663	1.99004
1.13274	1.98978
1.09872	1.98888
1.20574	1.9878
0.864592	1.98461
1.23211	1.98435
0.889128	1.98426
1.1263	1.98246
1.20231	1.98095
2.01224	1.98091
1.16113	1.98022
0.768765	1.97899
1.22872	1.97688
2.33372	1.97678
1.22045	1.97653
0.859604	1.97558
1.12536	1.97504
1.28518	1.9745
0.866739	1.97348
1.31517	1.97158
1.19532	1.96928
1.16335	1.96916
1.38193	1.96843
1.12012	1.96838
1.42819	1.96676
1.45114	1.96569
1.3063	1.96549
1.29222	1.965
1.26265	1.96486
1.15893	1.96477
2.36272	1.96473
0.892208	1.96423
1.33909	1.96393
1.18155	1.96333
0.910395	1.96099
1.613	1.96004
1.17468	1.9593
1.13184	1.95925
1.1598	1.95859
1.42455	1.95857
0.856525	1.95792
2.16481	1.95611
1.53511	1.95587
1.38672	1.95542
1.15883	1.95539
1.16613	1.95507
0.821957	1.95443
1.15815	1.95323
0.749118	1.95202
0.877706	1.95108
0.886227	1.95052
1.16292	1.95016
1.16583	1.94922
1.14878	1.94921
1.18316	1.94918
1.16956	1.94877
0.875658	1.94871
0.763059	1.94782
0.874677	1.94681
0.792223	1.94446
5.97792	1.94425
1.12701	1.94344
1.32446	1.94289
1.2178	1.94259
1.21392	1.94124
1.24902	1.94113
1.19651	1.93992
1.17895	1.93986
0.8373	1.93966
1.23227	1.93959
0.79397	1.93835
0.8879	1.93771
1.26815	1.9358
1.63749	1.93572
0.669432	1.93481
1.25157	1.93478
1.11926	1.9345
1.17727	1.93379
1.29353	1.93366
0.888843	1.93303
1.15316	1.93282
1.12783	1.93144
1.1179	1.93123
1.17819	1.92962
1.14739	1.92898
1.62657	1.92866
0.810284	1.92853
1.14183	1.92835
1.1761	1.92813
1.27489	1.92785
1.31563	1.92774
1.22682	1.92766
1.29088	1.92752
0.935599	1.92721
1.20721	1.9267
1.14565	1.92442
0.813137	1.92418
1.14947	1.92401
1.24214	1.92366
0.850476	1.92251
1.31534	1.92221
0.888881	1.92179
1.2693	1.92124
0.237255	1.92122
0.77511	1.92057
1.19358	1.92047
0.91154	1.91856
1.72732	1.91748
1.3094	1.91666
1.32524	1.91623
0.875345	1.91575
0.888367	1.91464
1.27572	1.91458
1.3048	1.9141
0.795274	1.91294
1.2501	1.91253
1.40718	1.90831
1.58611	1.9081
0.823423	1.90792
1.40867	1.90738
1.34353	1.90717
1.16765	1.90665
1.25386	1.90586
0.704714	1.9056
1.3894	1.90525
1.74037	1.90422
1.27826	1.90378
0.820896	1.90365
0.73285	1.90358
1.17212	1.90276
2.09568	1.90272
1.11651	1.90249
0.885245	1.90228
1.22715	1.90211
1.45976	1.90189
1.13755	1.90122
0.896065	1.89974
1.49714	1.89966
0.850046	1.89898
1.16837	1.89883
1.25984	1.89868
1.17931	1.89771
1.34426	1.89681
0.762933	1.89572
1.57795	1.89565
0.811577	1.89389
1.22447	1.89372
1.14484	1.89282
1.53264	1.89217
1.25859	1.8921
2.34077	1.89155
1.16796	1.89084
1.18734	1.89024
1.28568	1.88952
2.24699	1.88947
1.10534	1.88938
0.863747	1.8893
1.21575	1.88908
1.33128	1.88837
1.31682	1.88762
1.09109	1.88754
0.810662	1.88632
1.16987	1.88618
0.78282	1.88543
1.18029	1.88466
1.12516	1.88415
1.23293	1.88374
0.853934	1.88362
1.28092	1.88339
1.23472	1.88339
0.90906	1.88322
1.30444	1.8828
0.837993	1.88215
0.778374	1.88098
1.1932	1.88098
0.864605	1.88065
1.35923	1.87912
0.823079	1.87896
1.14624	1.87788
0.844177	1.87787
1.32645	1.8774
1.19125	1.87739
1.26594	1.87732
1.15627	1.8772
1.78251	1.87606
0.877526	1.87559
1.37031	1.87517
0.815484	1.87431
1.32889	1.8739
0.72734	1.87257
1.21578	1.87255
1.69948	1.87209
0.669189	1.87197
1.1459	1.87005
1.29534	1.86958
1.13878	1.86877
1.20572	1.86661
0.843596	1.86615
1.17785	1.86466
1.73522	1.86457
0.604376	1.86359
1.23166	1.8634
1.16773	1.86299
2.13225	1.86276
0.828607	1.86007
0.775677	1.85969
1.19382	1.85931
0.882634	1.85918
1.14517	1.85753
0.8483	1.85748
0.81234	1.85685
1.11156	1.85614
1.1424	1.85568
1.11702	1.85502
1.59514	1.85494
1.29098	1.85423
1.17763	1.85388
1.18948	1.85371
1.41235	1.85366
1.24428	1.85338
0.877442	1.85336
1.17415	1.85252
1.26642	1.85243
0.830793	1.85236
1.43868	1.85193
1.39434	1.85146
1.22976	1.85131
0.892373	1.85038
0.382611	1.85027
1.21576	1.84972
0.883845	1.84823
1.19259	1.84374
1.39402	1.84266
1.21451	1.84112
1.80214	1.84103
0.785531	1.84099
0.836638	1.8397
1.12063	1.83907
1.16183	1.83899
1.38534	1.83838
0.896429	1.83825
0.899232	1.83727
1.45701	1.83658
0.831593	1.83655
1.22302	1.83646
1.2626	1.83533
0.87264	1.83511
0.878613	1.8343
1.1371	1.83423
1.48226	1.83383
0.90249	1.83358
1.99165	1.83338
0.782523	1.83295
0.862533	1.8327
0.871717	1.83201
1.23117	1.83115
1.89402	1.83101
1.21306	1.83072
1.14824	1.82913
1.40226	1.82844
0.912775	1.82781
0.768015	1.82753
0.838887	1.82556
1.47562	1.82536
6.17412	1.82527
1.56124	1.824
1.20095	1.82394
0.916726	1.82371
1.22491	1.82242
4.27891	1.82191
1.8717	1.82179
1.28494	1.82152
1.12244	1.82072
0.895705	1.82065
1.20944	1.81945
0.903662	1.8192
1.286	1.81892
0.905091	1.81814
0.794271	1.81813
1.58264	1.81665
1.61188	1.81438
1.26366	1.81386
1.1654	1.81376
1.43115	1.81315
1.19207	1.81232
0.906332	1.81179
1.28775	1.81177
1.37696	1.81168
0.615089	1.81096
1.30628	1.81066
1.25115	1.81049
1.20937	1.81034
1.32784	1.80925
1.1906	1.80895
1.15646	1.80883
1.20013	1.80872
1.26375	1.8085
1.54362	1.80829
0.859032	1.80663
0.90113	1.80643
1.24655	1.80577
0.769381	1.80533
0.906857	1.80522
1.10805	1.80428
1.3306	1.80384
0.810033	1.80373
1.28729	1.80362
4.67422	1.80271
1.58548	1.80269
0.906963	1.80266
1.28219	1.80237
1.27689	1.80211
1.36551	1.80102
1.10041	1.80075
0.827903	1.79837
1.29885	1.79834
1.35756	1.79738
1.33896	1.79725
0.696522	1.79675
1.32465	1.79671
1.2855	1.79622
1.30536	1.79579
0.742485	1.79524
0.821069	1.79425
0.871972	1.79413
1.41257	1.79409
1.14855	1.79356
1.1601	1.79342
1.16698	1.79263
0.912698	1.79172
1.15474	1.79162
1.42893	1.7914
1.21144	1.79123
1.1729	1.79062
0.882258	1.78992
1.29327	1.7896
1.71253	1.78919
1.20125	1.78889
0.895233	1.78864
0.834971	1.78813
1.22659	1.78777
1.22785	1.78726
0.822661	1.78616
1.47577	1.78607
1.22283	1.78529
0.758109	1.78523
1.84491	1.78395
2.21881	1.78382
1.13986	1.7834
2.79585	1.7831
0.855071	1.78284
1.29439	1.78202
0.881817	1.7819
0.849096	1.78056
0.507823	1.78051
1.1899	1.78035
0.90652	1.77877
1.271	1.77801
2.50259	1.77798
0.87776	1.77742
0.915379	1.77711
2.12542	1.77655
1.14026	1.77652
1.12362	1.77594
1.55672	1.7759
1.24349	1.77569
1.16203	1.77555
0.889054	1.77478
1.42557	1.77428
1.18069	1.77422
0.835746	1.77207
1.13069	1.77127
1.18378	1.77104
1.41152	1.771
1.2726	1.77072
0.88265	1.77071
0.759217	1.77039
0.446394	1.76974
1.28215	1.76931
0.877111	1.76799
1.38053	1.76746
1.10037	1.76724
1.3956	1.76707
1.57489	1.76648
1.2257	1.76613
1.20356	1.76597
0.924334	1.76566
0.930607	1.76542
1.22017	1.7651
0.908609	1.76504
0.846673	1.7647
1.58328	1.76429
1.19805	1.7638
1.24379	1.76174
1.37661	1.76124
1.24915	1.75974
1.6612	1.75901
3.16334	1.75852
0.742154	1.75849
0.702718	1.75816
1.14955	1.7579
1.13368	1.75705
1.26273	1.75643
1.09054	1.75607
1.23625	1.75594
1.12845	1.75587
1.27232	1.75562
1.24651	1.75539
1.12519	1.75533
1.56417	1.7548
1.11268	1.75463
1.11743	1.75455
1.27354	1.75404
1.12586	1.75309
0.917757	1.75215
1.8725	1.75183
0.74888	1.75173
0.853404	1.75124
0.851987	1.75084
1.22606	1.74978
0.504496	1.74886
1.45558	1.74503
1.2776	1.74497
0.827441	1.74471
1.16464	1.74376
1.39371	1.74342
0.890085	1.74297
1.18977	1.74189
1.14502	1.74167
0.867989	1.74079
1.11773	1.7406
1.17942	1.73975
1.09568	1.73958
1.23041	1.73852
0.86472	1.73821
2.02209	1.73674
0.899921	1.73595
0.90438	1.73569
1.4478	1.73568
1.78327	1.73417
1.25142	1.73365
5.043	1.73302
0.840227	1.73186
0.905207	1.73176
1.3113	1.7313
12.6456	1.73074
1.13843	1.73052
1.19136	1.73033
0.885448	1.72952
1.26523	1.72946
1.21692	1.72939
1.41694	1.72701
1.12306	1.72686
1.40807	1.72675
0.870254	1.72657
1.25728	1.7255
0.826562	1.72547
0.894472	1.72527
1.16351	1.72512
1.14813	1.72437
0.658826	1.72411
1.22128	1.72389
1.35647	1.72375
1.18469	1.72323
1.15103	1.72311
0.841999	1.72187
1.22888	1.72101
1.37232	1.72048
1.1807	1.72039
1.14225	1.71875
0.932671	1.71807
1.33902	1.71711
1.27961	1.71625
1.38255	1.71622
1.15652	1.71479
0.73283	1.71444
0.806525	1.7135
1.27499	1.71337
0.903528	1.71315
1.1882	1.71183
1.57702	1.71159
1.54079	1.71151
1.19342	1.71059
7.1559	1.71049
1.20211	1.7104
0.725134	1.70992
0.820694	1.70959
1.54227	1.70951
3.69408	1.70827
1.19593	1.70827
1.41743	1.70722
1.16383	1.70701
0.522279	1.70699
1.26928	1.70684
0.796844	1.70682
0.831969	1.70582
1.34165	1.70568
0.885342	1.70559
1.16843	1.70523
1.22696	1.70502
1.10687	1.70474
1.41757	1.70456
1.13403	1.70438
1.24334	1.70407
1.28862	1.70329
0.90478	1.70285
0.82561	1.7025
0.910408	1.70153
0.816078	1.69975
0.866495	1.69973
1.1115	1.69817
1.14974	1.69816
1.16222	1.69791
1.27219	1.69753
1.22416	1.69739
1.15089	1.69698
1.54905	1.69654
1.77358	1.69642
1.6335	1.69623
0.870364	1.69587
2.65404	1.69565
1.2147	1.69544
1.28396	1.69525
0.813723	1.69504
1.27968	1.69409
1.33051	1.69395
0.912678	1.69357
1.14329	1.69336
1.11728	1.69304
2.09609	1.69234
1.63764	1.692
1.22083	1.69187
0.902957	1.69139
1.11534	1.69132
1.51034	1.69106
1.1504	1.69057
1.4701	1.69049
0.886538	1.69038
1.39133	1.6903
1.3604	1.69017
1.34461	1.69017
1.09271	1.69006
0.886674	1.68936
1.18453	1.68932
0.860208	1.68902
1.20146	1.68824
1.18693	1.68759
1.29742	1.6873
0.882135	1.68696
0.833619	1.68683
0.873256	1.68602
1.16231	1.68582
1.15531	1.68557
1.47204	1.68557
1.77926	1.68532
1.14644	1.68527
0.895175	1.68514
1.12337	1.68503
1.18589	1.6848
1.15609	1.68472
0.896091	1.68414
0.883731	1.68381
0.894023	1.6833
0.888093	1.68329
1.15589	1.68152
0.86756	1.68089
1.14517	1.68067
0.892633	1.67959
1.27941	1.67958
0.885548	1.67946
1.28193	1.6793
0.804729	1.6789
1.26772	1.67874
1.15298	1.67864
0.893962	1.67862
0.855712	1.67842
1.15025	1.67785
1.3476	1.67782
1.18278	1.67782
1.19585	1.67762
0.914976	1.67755
0.568737	1.6772
0.904829	1.67709
1.19402	1.67706
1.50271	1.67537
1.16338	1.6753
0.856623	1.67496
0.839226	1.67487
1.12787	1.6747
1.21913	1.67373
1.29763	1.67306
0.804361	1.67274
1.30887	1.6722
1.53768	1.67162
1.19189	1.67142
0.921048	1.67109
1.19158	1.67106
0.883465	1.67033
2.18015	1.66987
1.14536	1.66971
1.26664	1.66799
1.14121	1.66749
1.19306	1.66732
1.31452	1.66694
1.4643	1.66685
1.15644	1.66669
1.28589	1.66625
1.72523	1.66586
1.40592	1.66568
1.27323	1.66541
1.18066	1.66389
0.357003	1.66375
1.15002	1.66338
1.23869	1.66302
0.888194	1.66292
0.874892	1.66248
1.32339	1.66213
1.44748	1.6618
0.890341	1.66122
1.20658	1.66061
1.24735	1.65977
1.1949	1.65942
1.29151	1.65907
1.14668	1.65907
0.918831	1.65875
1.42083	1.65846
1.15285	1.65715
1.1379	1.65681
1.19681	1.65674
0.907613	1.65664
1.23731	1.65635
1.33566	1.65539
1.458	1.65488
0.922227	1.65472
1.29922	1.65158
1.37141	1.64814
1.96794	1.64762
0.848719	1.6469
1.1791	1.64579
1.10034	1.64419
0.908487	1.64374
1.1175	1.64298
1.20001	1.64288
1.13309	1.6428
1.24988	1.64244
0.906973	1.6416
0.899957	1.64148
1.20418	1.64138
0.919125	1.64026
1.18176	1.63999
1.34638	1.63976
1.11058	1.63962
1.08668	1.63868
0.840894	1.63803
0.813789	1.63767
0.657718	1.63742
1.15315	1.63732
1.10574	1.63727
1.17524	1.63671
1.26303	1.63458
1.42588	1.6341
1.24106	1.634
1.1398	1.63392
1.22872	1.63326
1.22818	1.633
3.13688	1.63234
1.18906	1.63233
1.23855	1.63219
0.895009	1.63167
1.17694	1.63121
1.39131	1.63116
1.26882	1.63104
1.1846	1.63096
1.22209	1.63078
1.7649	1.63034
1.85293	1.63019
1.24567	1.62997
1.32486	1.62986
0.863735	1.62917
1.11583	1.62899
1.61064	1.62858
1.38341	1.62842
1.16852	1.6281
1.16714	1.62801
1.33862	1.62782
1.23037	1.62782
0.896969	1.62778
1.42482	1.6271
1.48811	1.62601
1.15324	1.62583
1.15373	1.6251
1.2215	1.62508
1.18323	1.62464
0.914991	1.62453
1.41793	1.62405
0.520027	1.624
0.917095	1.62394
1.27431	1.62337
1.26974	1.62328
0.909558	1.62309
1.31651	1.62295
1.09168	1.62238
1.13698	1.62227
0.807604	1.62217
1.09937	1.62196
1.24694	1.6218
1.79918	1.62145
1.15927	1.62053
1.23701	1.62042
1.1742	1.61975
1.41063	1.61974
1.2551	1.61885
1.45749	1.61881
1.26805	1.61843
1.65968	1.61818
1.21085	1.61816
0.902728	1.6176
1.23176	1.61753
0.833402	1.61736
1.14931	1.61705
1.41406	1.61705
1.41413	1.61701
1.16512	1.61664
1.58045	1.61626
1.55044	1.61614
0.89852	1.61585
1.25247	1.61572
0.860054	1.61532
1.22068	1.6152
1.41017	1.61353
1.10832	1.61336
0.80932	1.6133
1.20878	1.61248
0.911902	1.6121
0.899252	1.6119
1.21701	1.61175
0.903611	1.61174
0.883293	1.61153
1.16206	1.61135
1.1603	1.61108
1.27864	1.61103
1.13639	1.61031
1.53474	1.60974
1.17513	1.60955
1.1775	1.6093
1.62319	1.60925
0.780967	1.60834
1.19831	1.60787
1.17085	1.60767
0.902761	1.60703
1.23541	1.60686
1.29072	1.60665
1.18327	1.60643
3.42651	1.60541
1.33269	1.6049
0.890751	1.6035
0.871916	1.60349
0.85438	1.60285
0.851773	1.60271
1.20021	1.60236
1.15022	1.60224
0.906024	1.60197
1.25292	1.60188
1.18377	1.60186
0.711752	1.60178
2.09853	1.60125
1.78587	1.60125
1.44138	1.60056
1.17136	1.60052
1.213	1.60027
1.24448	1.60014
1.22167	1.59975
1.27157	1.59961
1.20624	1.59945
1.19279	1.59924
1.58058	1.5989
1.16563	1.59874
1.26707	1.59871
1.20005	1.5984
0.87119	1.59753
0.793345	1.59731
0.897364	1.59723
0.529704	1.59705
1.10418	1.59589
1.15072	1.59482
0.894075	1.59358
1.14393	1.59338
1.27638	1.59327
1.13579	1.59325
1.23213	1.59296
1.14672	1.59263
1.18684	1.59218
1.56788	1.5918
1.12244	1.59173
1.18948	1.59106
0.905199	1.59091
1.22138	1.59067
1.21698	1.59045
1.28364	1.59045
1.42194	1.59041
1.28402	1.58958
1.15371	1.58941
0.679118	1.58932
1.15332	1.589
0.828517	1.58762
0.764741	1.5876
0.855741	1.58739
1.20682	1.58721
1.16768	1.5871
1.77835	1.58701
0.833318	1.58689
1.18139	1.58683
0.66415	1.58681
1.13329	1.58665
0.807183	1.58647
0.887031	1.58513
1.15995	1.58478
1.10026	1.58468
1.18816	1.58468
1.31052	1.58459
0.71467	1.58457
1.11539	1.58383
1.16976	1.58376
0.901214	1.58361
1.30361	1.58352
1.38273	1.58312
2.13222	1.58263
0.899525	1.58261
1.22373	1.58248
1.27854	1.5816
0.907613	1.57997
1.21458	1.57995
0.786228	1.57988
0.895238	1.57985
1.16065	1.57971
0.88627	1.57954
1.13619	1.5782
1.18579	1.57793
1.15845	1.5777
1.60357	1.57713
0.912663	1.57686
1.13857	1.57662
1.36068	1.57652
1.5073	1.57638
1.14331	1.57636
1.1724	1.5752
0.903246	1.57516
0.865837	1.57483
1.32338	1.57473
1.59959	1.57464
1.28351	1.57459
5.08569	1.57456
0.866586	1.57439
0.89682	1.57437
1.29831	1.57433
1.26489	1.57419
0.868906	1.57418
1.211	1.57328
0.91532	1.57249
1.31219	1.5724
1.66306	1.57107
0.896647	1.57099
1.4212	1.57007
0.897979	1.56949
1.55114	1.56939
0.789138	1.56919
1.1331	1.56914
1.32064	1.56859
1.12313	1.5683
1.21384	1.56661
0.913115	1.56652
0.911759	1.56635
1.1444	1.56597
1.24905	1.5658
0.858742	1.56475
1.18805	1.56405
0.681852	1.5638
1.87746	1.56335
1.18805	1.56332
1.42296	1.56326
2.39882	1.5627
1.29282	1.56214
1.13336	1.56211
1.58086	1.56195
1.26573	1.56168
1.13769	1.56109
1.17955	1.56088
1.19324	1.56083
1.43711	1.55981
1.15509	1.55976
1.19548	1.55964
1.3048	1.55944
1.1525	1.55922
1.53587	1.55874
0.905714	1.55854
1.16418	1.55824
1.10702	1.5581
1.17781	1.55768
1.37651	1.55763
1.32258	1.5576
1.4145	1.55756
4.15884	1.55737
1.19894	1.55732
0.918356	1.5573
1.92869	1.55677
1.15385	1.55675
0.902547	1.55656
1.37266	1.55645
1.30565	1.55644
1.63905	1.55638
1.52755	1.55621
1.31612	1.55592
1.10329	1.55573
1.13537	1.55536
1.12077	1.55527
2.49984	1.55408
0.85215	1.55339
0.923559	1.55318
0.89988	1.55285
0.93028	1.5527
0.915757	1.55215
1.52253	1.55158
1.11699	1.55107
2.01015	1.55095
0.91072	1.55064
0.828496	1.5506
1.21145	1.55035
0.92587	1.55032
0.9132	1.54997
0.915475	1.54926
1.21886	1.54896
1.36292	1.54893
1.24687	1.54862
0.892337	1.54855
1.18392	1.54828
1.25095	1.54788
1.11371	1.54735
1.11013	1.54731
1.36266	1.54722
0.826727	1.54583
0.580961	1.54574
0.912466	1.54538
1.18718	1.54495
1.26598	1.54463
1.1019	1.54457
1.25849	1.54452
2.01813	1.54395
0.45298	1.54392
0.840743	1.54379
0.897635	1.54376
0.877685	1.54317
2.07434	1.543
1.87578	1.543
1.14954	1.54245
0.869104	1.54245
1.70661	1.54239
2.23496	1.54229
1.90023	1.54184
1.12613	1.54079
0.789473	1.54046
1.28047	1.54018
1.14813	1.54014
0.914571	1.53988
1.20094	1.53985
0.89134	1.53966
2.18894	1.53903
1.11296	1.53884
0.864269	1.53884
1.12196	1.5384
0.855164	1.53818
0.88702	1.53812
1.30854	1.53761
1.27503	1.53757
1.97415	1.53657
1.13945	1.53618
0.887367	1.536
1.31937	1.53594
1.94262	1.53565
4.57029	1.5355
1.18007	1.53537
1.25359	1.53508
1.28499	1.53436
0.830676	1.53411
1.61593	1.53408
1.21587	1.53316
1.12171	1.53306
1.78179	1.5327
0.575533	1.53243
1.39463	1.53175
0.90173	1.53151
1.30691	1.53143
1.12228	1.53109
1.18272	1.53108
1.24052	1.53085
0.880438	1.5304
1.27526	1.52991
0.772718	1.52967
1.21538	1.52937
1.14628	1.52933
1.17726	1.52914
0.882152	1.52898
1.25878	1.52829
0.904917	1.52818
0.844263	1.52772
1.37641	1.52763
1.15512	1.52742
1.79364	1.52741
0.865212	1.52713
1.20751	1.52646
1.31457	1.52604
1.12463	1.52573
1.15793	1.52562
0.881541	1.52561
1.31824	1.52525
1.77506	1.52469
1.74113	1.52425
1.17927	1.5242
1.42638	1.52413
1.49357	1.52408
1.1864	1.5236
1.20393	1.52311
1.33463	1.52278
1.26198	1.52129
0.520699	1.52032
1.38243	1.51958
1.17436	1.51947
1.15825	1.51946
1.18151	1.51936
1.15298	1.51902
0.704546	1.519
1.15024	1.5187
2.42253	1.51845
1.10456	1.51799
1.18138	1.51725
0.889945	1.51711
0.898609	1.51709
2.01611	1.51697
0.908361	1.5157
1.19752	1.51509
1.36081	1.5147
1.18883	1.51446
0.027869	1.51442
1.89114	1.51415
1.27926	1.51406
1.1056	1.51392
0.77716	1.51349
1.12554	1.51294
1.25841	1.51279
1.24621	1.5125
0.898296	1.51201
1.4655	1.51198
1.24158	1.51185
1.13503	1.51172
1.71993	1.51157
1.53419	1.51042
1.75724	1.51041
1.16582	1.51002
1.29223	1.50984
1.1424	1.50969
1.20762	1.50902
1.12322	1.50872
0.877068	1.50848
1.09571	1.50826
1.37044	1.50772
1.31125	1.50714
1.35504	1.507
1.11828	1.50666
1.25606	1.50624
1.19805	1.50612
0.870289	1.50593
1.13757	1.50558
1.31321	1.5055
1.43888	1.50548
1.2225	1.50536
1.17021	1.50495
0.929762	1.50474
1.17232	1.50474
1.47982	1.50465
1.12154	1.50446
0.861496	1.50385
1.39158	1.50382
1.28393	1.50327
0.805184	1.50295
1.28398	1.50254
0.880065	1.50249
0.765953	1.50214
1.8838	1.50183
1.24201	1.50178
1.3817	1.50156
1.23022	1.50092
1.27751	1.50091
1.25121	1.50058
0.914723	1.49955
0.9144	1.49944
1.19127	1.49939
1.14751	1.49924
1.38466	1.49873
1.50287	1.49859
1.30065	1.49827
1.32659	1.49815
0.81324	1.49724
1.20959	1.49711
1.51466	1.497
1.42163	1.49684
1.8264	1.49647
1.18803	1.49633
1.12387	1.49572
1.328	1.49517
0.237808	1.49489
0.791072	1.49419
1.35316	1.49376
0.874477	1.49365
0.911293	1.49352
0.813373	1.49328
1.11563	1.49322
1.41721	1.49311
0.874981	1.4931
1.2369	1.49239
0.867612	1.49238
1.18635	1.49227
2.89986	1.49195
1.13403	1.49166
0.882336	1.49127
0.922126	1.49082
1.09566	1.49081
1.09213	1.49036
0.838443	1.49011
1.322	1.49006
1.37737	1.48976
1.14196	1.48821
1.26233	1.4879
1.10896	1.48762
1.26569	1.48723
1.41058	1.48649
0.784673	1.48623
0.922251	1.48621
0.911757	1.48601
0.913002	1.48573
1.21262	1.48491
0.853803	1.48424
0.915285	1.4837
1.10759	1.48368
1.17427	1.48359
1.78454	1.48338
0.886927	1.48322
1.49344	1.48237
1.26146	1.48189
0.248943	1.48142
0.841194	1.48134
1.33602	1.48053
5.38179	1.48043
0.91116	1.48015
0.900667	1.48001
0.913475	1.47986
1.12803	1.47949
0.802901	1.47946
0.922477	1.4792
1.14551	1.47892
1.47257	1.47877
1.15789	1.47877
1.13322	1.47852
1.1531	1.47843
1.7507	1.47798
1.29053	1.47709
1.24628	1.47693
0.509401	1.47667
7.39899	1.47655
1.17553	1.47611
0.583696	1.47589
1.69203	1.47549
1.16365	1.47538
1.61678	1.4752
1.17407	1.47493
0.826908	1.47488
1.10532	1.47394
1.12731	1.47393
2.72725	1.47313
1.31907	1.47298
1.18994	1.47283
0.905604	1.47256
1.38399	1.4723
0.874246	1.4721
1.27072	1.47198
1.37258	1.47176
0.868494	1.47122
1.08922	1.47115
1.24876	1.47099
0.721209	1.47097
1.29339	1.47063
2.44366	1.47049
1.34832	1.47017
1.09783	1.46964
1.1486	1.4696
1.17562	1.46866
1.20363	1.46845
1.33244	1.46828
1.17008	1.46783
0.85142	1.46775
1.30085	1.46748
1.36336	1.46732
1.17609	1.4666
1.09489	1.46656
1.10676	1.46654
0.914002	1.46632
0.791212	1.46614
1.2742	1.46577
1.11921	1.46548
1.10213	1.46528
1.22488	1.46524
1.14452	1.46518
1.3331	1.46455
1.18796	1.46455
1.24047	1.46454
0.90782	1.46447
1.32122	1.46447
1.12291	1.46377
1.32195	1.46353
2.38686	1.46293
1.15192	1.46277
1.63535	1.46275
1.184	1.46075
1.27154	1.46069
1.10853	1.46049
1.19028	1.46048
1.68119	1.46012
1.25115	1.46009
1.12377	1.45996
1.11385	1.45975
1.15598	1.45962
0.905281	1.4595
1.20372	1.45941
1.25842	1.45902
1.11315	1.45886
0.853683	1.45866
1.12852	1.45846
1.17516	1.45839
1.17404	1.45828
1.34374	1.45827
1.1166	1.45795
0.687513	1.45788
1.1101	1.45766
0.871212	1.4575
1.28932	1.45719
0.908143	1.45692
1.35463	1.45692
1.17742	1.45646
1.19339	1.45636
1.20973	1.45628
1.25854	1.4562
0.906222	1.45575
1.3291	1.45563
2.42114	1.45555
1.16173	1.45516
0.848936	1.45504
1.10441	1.4549
0.919876	1.45471
1.43729	1.45462
0.871527	1.45461
1.59628	1.45458
1.24311	1.45435
1.48313	1.45383
1.18392	1.4533
0.373076	1.45328
1.56792	1.4531
0.88692	1.45292
1.17993	1.45278
1.22684	1.45137
1.27621	1.45113
1.74972	1.45001
1.54283	1.44978
0.865382	1.44973
1.21897	1.44933
1.1522	1.44918
1.16849	1.44901
0.929923	1.44882
0.879245	1.44865
1.41137	1.44864
1.68852	1.44847
1.16244	1.44835
1.24191	1.44833
1.49607	1.44826
1.33092	1.4472
0.749454	1.44715
1.30616	1.44666
1.18298	1.44644
1.19938	1.44543
1.21174	1.44517
1.15078	1.44516
0.688046	1.44488
1.13631	1.44487
1.2132	1.44479
1.68071	1.44399
1.17423	1.44337
0.87471	1.44329
1.17395	1.44315
0.731404	1.44314
1.13817	1.44224
0.909372	1.4408
0.916415	1.44073
0.914006	1.44027
1.25245	1.44012
1.23887	1.44005
4.3221	1.43971
2.22472	1.43948
1.31049	1.43924
1.27022	1.43904
0.909476	1.43884
1.22513	1.4385
1.15664	1.43803
3.44156	1.43794
0.860826	1.43764
0.914455	1.43758
0.872118	1.4374
1.37292	1.43736
1.72289	1.43712
1.14922	1.43708
2.88835	1.43706
1.26628	1.43701
0.833958	1.43656
1.2078	1.43606
1.12534	1.43602
1.48294	1.43601
1.42252	1.43486
0.890764	1.43427
[truncated: 18,195 more rows]

## Sheet: I
		Mutation Number									Mutation Frequency (%)
GBM	BLCA	AML	BRCA	KIRC					A>C/T>G	A>G/T>C	A>T/T>A	C>A/G>T	C>G/G>C	C>T/G>A
45	174	11	40	285				GBM	3.54214	13.0522	4.22438	9.5307	7.84233	61.8083
32	115	15	23	59				BLCA	1.90873	6.44855	2.61264	9.65174	27.5184	51.86
52	136	8	107	341				AML	3.32883	12.0108	4.31849	11.8309	7.01754	61.4935
47	240	15	44	270				BRCA	4.75868	11.4711	4.92955	13.5248	17.9676	47.3482
57	55	16	65	79				KIRC	7.34448	16.5135	14.0808	18.0505	10.316	33.6947
46	756	32	35	255
51	566	9	219	259
54	318	4	46	119
61	212	14	123	47
69	114	8	17	51
42	115	9	86	153
60	343	18	54	427
42	318	11	35	35
56	106	8	113	36
34	126	10	40	95
26	701	13	42	73
27	119	18	25	53
78	533	17	47	511
5	579	14	35	207
32	447	21	50	65
23	75	4	42	43
35	388	1	80	121
80	98	5	43	59
21	200	14	32	570
64	246	13	60	54
56	92	10	215	173
69	377	15	13	176
44	361	3	87	369
46	183	12	51	85
7	40	10	80	60
34	169	1	32	81
5	57	2	24	75
41	83	2	33	190
54	171	1	31	77
49	126	23	38	40
75	161	18	100	67
76	239	5	36	78
2	118	2	10	78
47	257	11	37	55
53	731	15	43	142
41	322	3	57	114
23	363	15	17	332
57	249	10	21	1
58	91	27	209	193
65	234	4	12	1
71	1757	6	22	85
54	272	9	50	127
62	134	12	61	69
52	151	4	30	59
59	135	16	142	56
50	137	13	228	32
34	273	12	13	74
38	139	13	32	57
37	1113	21	52	165
32	330	14	32	186
11	242	17	66	136
49	205	17	24	1
51	109	20	26	107
45	458	1	53	103
34	229	13	43	82
63	420	18	77	52
87	464	12	60	29
30	516	10	12	1
55	123	14	90	55
84	1415	13	202	1
71	44	1	19	76
40	26	15	75	113
64	1030	10	27	1
50	260	11	99	1
35	134	21	30	78
60	161	15	23	61
57	209	2	53	105
61	169	1	24	66
37	308	9	138	70
51	85	17	38	74
27	76	1	102	58
38	356	4	36	65
80	200	12	43	64
75	264	13	59	45
26	238	16	25	1
48	217	7	210	108
69	446	6	75	1
64	427	8	37	95
29	142	16	59	104
60	91	2	189	26
68	154	5	28	46
55	573	15	60	53
46	369	1	75	73
52	460	6	63	109
27	302	17	45	53
35	140	16	64	80
47	206	19	143	51
28	304	9	62	1
34	365	1	30	45
43	83	25	48	48
46	1012	21	46	1
35	521	14	28	25
54	114	16	91	74
58	451	19	47	37
43	845	14	53	95
48	145	2	199	55
164	230	23	25	65
34	167	16	93	48
47	197	17	25	64
37	423	25	86	56
38	104	13	26	70
58	175	17	30	65
39	275	1	65	73
76	332	12	72	82
46	477	11	22	78
50	130	9	1	101
37	108	13	25	65
55	191	22	36	714
43	133	10	19	71
30	109	14	118	38
11	348	13	37	46
52	548	25	32	62
40	155	10	37	84
44	110	16	27	58
50	210	6	1	49
48	553	10	206	54
60	166	5	40	63
68	181	1	44	37
70	176	10	172	50
66	107	12	47	59
45	545	10	23	47
52	177	9	31	80
33	323	21	37	60
58	149	16	27	54
39	79	2	72	45
59		8	119	41
39		18	185	52
25		11	129	59
34		3	36	68
29		4	87	40
58		1	33	57
48		14	1	66
72		11	107	67
59		14	39	63
35		1	32	70
40		18	36	50
65		4	248	107
21		3	140	68
44		29	98	75
53		17	78	79
25		20	127	59
46		8	47	47
44		22	25	75
43		8	27	35
58		18	1	31
69		9	85	109
43		10	52	99
52		11	39	50
11		25	34	25
62		6	21	86
51		8	86	76
78		20	55	77
74		11	24	34
110		17	33	48
132		8	36	58
41		6	41	73
58		6	1	52
79		2	28	91
41		15	1	39
46		10	31	84
70		6	35	98
80		13	64	82
56		6	96	59
21		17	88	76
50		10	70	91
65		8	57	40
34		12	116	41
44		8	35	65
58		14	133	64
71		12	37	59
31		7	29	26
72		19	86	64
36		13	46	89
46		9	163	28
38		12	16	63
42		4	49	54
48		13	99	111
49		32	93	71
55		20	101	81
46		19	1	20
40		8	92	27
29		4	54	19
74		40	48	66
47		6	46	90
49		7	57	49
32			129	35
48			98	44
44			30	60
53			32	72
39			27	66
33			23	71
76			95	44
45			40	58
40			236	78
60			20	1
46			128	1
55			63	75
37			47	51
54			39	57
40			1	18
37			85	42
50			38	107
21			56	23
47			64	60
45			77	49
47			88	53
25			103	49
66			24	39
35			31	63
34			105	1
52			27	53
51			71	1
81			21	36
29			107	21
47			44	47
41			25	40
28			21	1
51			18	70
22			23	96
45			67	32
37			41	1
43			149	47
70			38	1
83			28	44
67			95	87
17			25	1
69			44	1
45			42	1
59			33	47
92			49	61
69			42	77
74			56	29
56			75	55
35			45	48
77			51	14
46			60	47
50			48	84
63			33	48
34			51	1
92			55	28
76			83	42
57			76	22
31			62	24
69			299	63
44			49	26
59			64	47
39			35	70
53			77	38
58			55	36
66			40	79
48			142	88
67			94	63
82			57	67
41			28	49
38			70	37
89			29	49
33			28	41
61			15	31
34			47	29
56			43	21
46			57	93
55			43	45
69			26	56
50			22	42
39			42	76
54			29	96
54			19	40
49			68	22
47			54	45
51			30	78
43			93	46
47			115	42
43			75	73
71			27	35
46			60	51
58			37	41
71			33	49
43			41	42
76			34	39
44			140	43
28			137	39
46			37	29
45			35	37
42			62	44
27			35	66
47			53	116
			99	61
			53	42
			49	96
			16	37
			68	52
			29	111
			35	43
			56	63
			34	42
			23	73
			128	63
			15	44
			48	30
			51	77
			46	33
			51	67
			32	44
			38	42
			38	63
			48	48
			68	26
			25	60
			90	49
			32	71
			94	78
			18	45
			32	39
			67	41
			146	91
			41	62
			61	61
			58	38
			48	71
			35	63
			64	60
			75	55
			25	124
			33	117
			42	24
			32	87
			50	47
			23	45
			27	1
			81	76
			20	67
			54	112
			27	44
			25	34
			138	52
			26	69
			57	1
			28	1
			41	25
			30	45
			86	17
			211	21
			78	21
			39	15
			22	35
			49	73
			42	46
			31	67
			36	38
			53	93
			34	53
			90	70
			48	53
			24	40
			27	59
			38	64
			51	30
			10	85
			6	55
			62	50
			278	85
			39	137
			35	53
			32	67
			48	91
			45	67
			12	67
			26	76
			45	49
			83	100
			25	57
			33	37
			31	76
			32	73
			14	53
			12	69
			28	79
			54	57
			45	113
			247	67
			36	52
			26	86
			112	95
			35	61
			37	33
			30	45
			226	79
			47	83
			58	50
			42	62
			60	107
			57	116
			23	32
			22	106
			58	93
			25	54
			201	101
			85	1
			56	99
			35	98
			30	84
			69	43
			48	69
			41	85
			23	78
			38	32
			333	80
			87	24
			29	32
			30	61
			73	81
			91	34
			188	95
			37	56
			19	73
			26	68
			20	53
			95	115
			24	68
			22	62
			109	141
			83	50
			56	42
			28	45
			42	44
			162	64
			118	58
			161	53
			55	47
			23	39
			61	48
			61	38
			32	12
			47	23
			45	36
			54	39
			52	29
			23	49
			99	59
			51	64
			55	45
			52
			34
			50
			44
			31
			311
			47
			68
			76
			90
			24
			81
			43
			39
			131
			68
			38
			59
			73
			25
			45
			400
			34
			44
			61
			45
			85
			32
			158
			171
			32
			84
			79
			29
			37
			72
			48
			141
			26
			46
			60
			23
			84
			159
			45
			35
			34
			32
			33
			37
			23
			62
			30
			21
			27
			44
			58
			31
			74
			37
			25
			47
			45
			37
			58
			50
			21
			43
			13
			15
			36
			27

## Sheet: J
	C>A/G>T	C>T/G>A	A>G/T>C	A>T/T>A	C>G/G>C	A>C/T>G
Mutations per patient	0.0121	0.0339	0.0085	0.0255	0.0182	0.0897

## Sheet: K
	C>A/G>T	C>T/G>A	A>G/T>C	A>T/T>A	C>G/G>C	A>C/T>G
Mutations per patient	0.092	0.077	0.056	0.052	0.048	0.021
