# Supplementary material for: Exosome component 1 cleaves single-stranded DNA and sensitizes human kidney renal clear cell carcinoma cells to poly(ADP-ribose) polymerase inhibitor
Source: eLife. 2021 Jun 23;10:e69454. doi: 10.7554/eLife.69454 (PMC8260222; doi:10.7554/eLife.69454)
Supplement: Figure 4—figure supplement 1—source data 1. [file elife-69454-fig4-figsupp1-data1.xlsx]

## Sheet: F
	Mutation Frequency (%)
	Vector	EXOSC1
A>T	6.25	5.56
A>G	12.5	0.1
A>C	6.25	2.78
T>A	6.25	2.78
T>G	6.25	0.1
T>C	12.5	0.1
G>A	3.13	0.1
G>T	6.25	16.67
G>C	0.1	2.78
C>A	0.1	52.78
C>T	37.5	11.11
C>G	3.13	5.56

## Sheet: G
	Normalized Mutation Frequency (%)
	Vector	EXOSC1
A>T	6.25	5.56
A>G	12.5	0.1
A>C	6.25	2.78
T>A	6.25	2.78
T>G	6.25	0.1
T>C	12.5	0.1
G>A	2.75	0.1
G>T	5.5	14.67
G>C	0.1	2.44
C>A	0.1	46.44
C>T	33	9.78
C>G	2.75	4.89

## Sheet: H
C>G/G>C Rank	EXOSC1 Rank		C>A/G>T Rank	EXOSC1 Rank		C>A Rank	EXOSC1 Rank		G>T Rank	EXOSC1 Rank		Total Rank	EXOSC1 Rank
54	1		106	1		72	1		194	1		153	1
109	2		241	2		247	2		267	2		142	2
384	3		298	3		266	3		320	3		377	3
298	4		138	4		161	4		157	4		342	4
289	5		159	5		152	5		187	5		305	5
385	6		164	6		312	6		54	6		359	6
430	7		441	7		440	7		434	7		428	7
295	8		134	8		158	8		155	8		103	8
27	9		44	9		61	9		53	9		46	9
42	10		94	10		194	10		83	10		99	10
170	11		172	11		167	11		196	11		161	11
226	12		215	12		185	12		259	12		190	12
25	13		43	13		95	13		29	13		415	13
316	14		291	14		337	14		226	14		429	14
378	15		125	15		137	15		181	15		143	15
98	16		280	16		282	16		296	16		146	16
291	17		296	17		60	17		409	17		186	17
304	18		283	18		179	18		359	18		262	18
238	19		127	19		98	19		184	19		217	19
418	20		440	20		441	20		426	20		437	20
290	21		375	21		407	21		234	21		253	21
391	22		290	22		142	22		374	22		427	22
260	23		66	23		22	23		199	23		155	23
128	24		281	24		224	24		326	24		77	24
137	25		30	25		44	25		40	25		72	25
251	26		204	26		309	26		96	26		324	26
227	27		53	27		50	27		125	27		70	27
303	28		115	28		233	28		76	28		250	28
183	29		72	29		49	29		172	29		78	29
313	30		413	30		419	30		337	30		420	30
425	31		439	31		439	31		431	31		438	31
194	32		126	32		138	32		134	32		181	32
315	33		192	33		93	33		273	33		334	33
402	34		157	34		251	34		132	34		269	34
443	35		434	35		421	35		440	35		440	35
208	36		353	36		314	36		352	36		278	36
63	37		50	37		78	37		70	37		39	37
284	38		320	38		252	38		338	38		237	38
157	39		250	39		341	39		147	39		149	39
149	40		34	40		30	40		50	40		121	40
408	41		329	41		372	41		240	41		392	41
250	42		101	42		263	42		31	42		176	42
19	43		19	43		8	43		22	43		22	43
116	44		35	44		21	44		90	44		48	44
90	45		227	45		163	45		292	45		194	45
263	46		147	46		116	46		204	46		184	46
219	47		152	47		231	47		116	47		138	47
14	48		12	48		14	48		14	48		15	48
139	49		184	49		239	49		173	49		92	49
325	50		302	50		270	50		322	50		255	50
338	51		242	51		250	51		268	51		174	51
233	52		420	52		363	52		428	52		421	52
187	53		236	53		358	53		124	53		387	53
211	54		254	54		281	54		245	54		283	54
59	55		85	55		76	55		164	55		63	55
96	56		308	56		380	56		203	56		114	56
93	57		107	57		73	57		198	57		54	57
229	58		122	58		298	58		47	58		226	58
350	59		174	59		117	59		248	59		171	59
347	60		299	60		213	60		350	60		329	60
105	61		120	61		186	61		126	61		141	61
414	62		135	62		271	62		56	62		205	62
234	63		77	63		55	63		136	63		228	63
86	64		251	64		209	64		287	64		231	64
417	65		282	65		232	65		331	65		379	65
383	66		274	66		308	66		237	66		301	66
361	67		433	67		422	67		439	67		424	67
273	68		92	68		240	68		44	68		106	68
256	69		253	69		107	69		354	69		125	69
148	70		219	70		90	70		308	70		148	70
436	71		256	71		180	71		332	71		422	71
274	72		373	72		327	72		385	72		267	72
257	73		137	73		69	73		242	73		126	73
80	74		197	74		100	74		281	74		134	74
111	75		76	75		54	75		135	75		79	75
423	76		404	76		361	76		404	76		439	76
164	77		140	77		274	77		59	77		219	77
133	78		177	78		323	78		73	78		69	78
206	79		63	79		35	79		156	79		108	79
400	80		315	80		386	80		218	80		395	80
231	81		220	81		139	81		270	81		191	81
246	82		349	82		206	82		391	82		249	82
110	83		74	83		88	83		130	83		93	83
396	84		397	84		347	84		412	84		381	84
342	85		78	85		97	85		88	85		213	85
89	86		47	86		68	86		57	86		33	86
351	87		112	87		118	87		167	87		122	87
209	88		331	88		215	88		379	88		307	88
301	89		307	89		379	89		201	89		348	89
421	90		402	90		429	90		262	90		418	90
22	91		28	91		25	91		41	91		25	91
357	92		416	92		417	92		387	92		383	92
46	93		297	93		311	93		288	93		187	93
376	94		390	94		290	94		420	94		297	94
393	95		376	95		261	95		408	95		352	95
103	96		31	96		46	96		42	96		36	96
172	97		278	97		170	97		357	97		258	97
30	98		104	98		160	98		105	98		76	98
354	99		212	99		182	99		254	99		286	99
122	100		169	100		165	100		193	100		152	100
223	101		213	101		183	101		256	101		235	101
348	102		379	102		373	102		353	102		376	102
75	103		57	103		136	103		48	103		59	103
166	104		167	104		315	104		60	104		167	104
95	105		208	105		221	105		200	105		90	105
248	106		351	106		208	106		393	106		238	106
58	107		173	107		114	107		246	107		109	107
404	108		384	108		362	108		372	108		384	108
283	109		261	109		89	109		371	109		227	109
37	110		146	110		222	110		109	110		85	110
237	111		96	111		96	111		139	111		295	111
358	112		54	112		131	112		45	112		364	112
324	113		301	113		269	113		321	113		266	113
356	114		286	114		359	114		215	114		247	114
403	115		243	115		333	115		133	115		346	115
13	116		10	116		12	116		12	116		13	116
26	117		103	117		106	117		151	117		62	117
405	118		263	118		91	118		373	118		430	118
230	119		123	119		135	119		180	119		157	119
186	120		312	120		355	120		257	120		220	120
235	121		289	121		389	121		137	121		202	121
317	122		385	122		391	122		341	122		399	122
35	123		37	123		39	123		62	123		127	123
330	124		361	124		382	124		299	124		308	124
66	125		89	125		176	125		38	125		51	125
266	126		90	126		228	126		75	126		118	126
368	127		395	127		401	127		348	127		394	127
88	128		62	128		65	128		100	128		94	128
207	129		46	129		67	129		55	129		53	129
202	130		60	130		63	130		95	130		102	130
254	131		79	131		104	131		98	131		160	131
124	132		65	132		111	132		65	132		38	132
163	133		165	133		70	133		291	133		183	133
18	134		26	134		40	134		20	134		21	134
318	135		265	135		254	135		278	135		340	135
252	136		162	136		156	136		190	136		232	136
135	137		255	137		124	137		360	137		211	137
71	138		118	138		127	138		174	138		61	138
156	139		58	139		58	139		93	139		264	139
253	140		163	140		211	140		152	140		177	140
64	141		110	141		80	141		205	141		110	141
29	142		64	142		159	142		32	142		32	142
193	143		124	143		249	143		85	143		100	143
182	144		154	144		125	144		213	144		139	144
176	145		150	145		283	145		72	145		86	145
120	146		200	146		59	146		317	146		84	146
38	147		51	147		42	147		114	147		60	147
1	148		1	148		1	148		1	148		1	148
169	149		171	149		166	149		195	149		210	149
61	150		20	150		23	150		24	150		35	150
369	151		61	151		64	151		99	151		224	151
215	152		359	152		381	152		298	152		316	152
387	153		401	153		383	153		399	153		419	153
288	154		348	154		368	154		284	154		274	154
60	155		67	155		115	155		67	155		57	155
293	156		406	156		408	156		347	156		347	156
121	157		226	157		62	157		349	157		71	157
416	158		388	158		345	158		397	158		355	158
221	159		71	159		85	159		119	159		47	159
363	160		293	160		338	160		227	160		385	160
180	161		70	161		43	161		169	161		163	161
429	162		345	162		296	162		370	162		416	162
178	163		113	163		81	163		208	163		130	163
424	164		444	164		443	164		444	164		441	164
441	165		435	165		431	165		436	165		425	165
62	166		108	166		223	166		68	166		136	166
118	167		198	167		258	167		143	167		83	167
220	168		114	168		84	168		210	168		111	168
401	169		188	169		295	169		127	169		345	169
426	170		356	170		402	170		197	170		363	170
406	171		392	171		423	171		276	171		327	171
15	172		14	172		16	172		16	172		17	172
255	173		300	173		344	173		241	173		275	173
279	174		258	174		129	174		368	174		179	174
9	175		25	175		32	175		8	175		9	175
445	176		446	176		446	176		446	176		445	176
92	177		228	177		276	177		192	177		151	177
386	178		357	178		169	178		410	178		257	178
259	179		305	179		318	179		295	179		244	179
407	180		203	180		210	180		189	180		277	180
147	181		383	181		398	181		336	181		268	181
192	182		260	182		388	182		129	182		201	182
399	183		423	183		416	183		415	183		402	183
151	184		195	184		195	184		183	184		320	184
367	185		394	185		370	185		395	185		325	185
43	186		56	186		52	186		131	186		41	186
432	187		443	187		444	187		443	187		442	187
309	188		342	188		292	188		366	188		221	188
33	189		13	189		15	189		15	189		16	189
232	190		262	190		300	190		225	190		270	190
311	191		41	191		134	191		28	191		73	191
258	192		277	192		109	192		380	192		240	192
379	193		438	193		434	193		438	193		431	193
271	194		183	194		285	194		118	194		285	194
129	195		149	195		226	195		112	195		58	195
240	196		129	196		201	196		92	196		192	196
53	197		229	197		317	197		162	197		104	197
162	198		276	198		272	198		290	198		279	198
281	199		412	199		396	199		402	199		319	199
32	200		11	200		13	200		13	200		14	200
302	201		380	201		280	201		411	201		374	201
419	202		270	202		304	202		233	202		341	202
294	203		80	203		66	203		154	203		233	203
336	204		240	204		87	204		369	204		248	204
349	205		105	205		273	205		33	205		225	205
4	206		4	206		4	206		4	206		4	206
217	207		91	207		83	207		170	207		241	207
28	208		36	208		37	208		58	208		52	208
10	209		7	209		9	209		9	209		10	209
366	210		225	210		306	210		146	210		230	210
45	211		133	211		157	211		150	211		75	211
322	212		201	212		153	212		235	212		175	212
242	213		223	213		102	213		315	213		209	213
190	214		55	214		133	214		46	214		68	214
314	215		42	215		53	215		49	215		74	215
337	216		259	216		331	216		221	216		356	216
39	217		181	217		284	217		117	217		43	217
413	218		369	218		305	218		377	218		397	218
282	219		288	219		246	219		335	219		252	219
41	220		186	220		130	220		263	220		66	220
362	221		264	221		196	221		310	221		357	221
310	222		239	222		190	222		305	222		353	222
381	223		100	223		147	223		91	223		144	223
222	224		116	224		237	224		78	224		317	224
55	225		170	225		219	225		163	225		56	225
332	226		426	226		414	226		425	226		368	226
94	227		83	227		168	227		64	227		113	227
2	228		2	228		2	228		2	228		2	228
189	229		155	229		187	229		177	229		206	229
70	230		117	230		238	230		79	230		147	230
326	231		136	231		214	231		104	231		166	231
334	232		428	232		430	232		421	232		393	232
146	233		344	233		387	233		266	233		200	233
264	234		68	234		119	234		71	234		97	234
427	235		237	235		244	235		261	235		360	235
165	236		166	236		216	236		159	236		112	236
268	237		178	237		324	237		74	237		284	237
312	238		218	238		248	238		223	238		164	238
320	239		393	239		424	239		282	239		386	239
91	240		354	240		376	240		293	240		168	240
370	241		206	241		265	241		153	241		314	241
247	242		424	242		437	242		285	242		361	242
339	243		436	243		436	243		427	243		435	243
327	244		303	244		374	244		191	244		239	244
438	245		417	245		399	245		406	245		407	245
225	246		314	246		329	246		304	246		199	246
167	247		168	247		316	247		61	247		256	247
442	248		287	248		360	248		217	248		398	248
145	249		187	249		188	249		219	249		124	249
394	250		370	250		371	250		319	250		370	250
300	251		143	251		220	251		108	251		154	251
11	252		8	252		10	252		10	252		11	252
104	253		246	253		145	253		255	253		197	253
198	254		284	254		326	254		313	254		222	254
36	255		16	255		18	255		18	255		19	255
143	256		119	256		128	256		176	256		88	256
48	257		45	257		36	257		101	257		49	257
267	258		399	258		413	258		328	258		260	258
340	259		321	259		253	259		339	259		338	259
431	260		358	260		350	260		327	260		417	260
24	261		75	261		29	261		224	261		82	261
345	262		377	262		409	262		239	262		409	262
76	263		391	263		364	263		390	263		354	263
261	264		38	264		77	264		36	264		105	264
306	265		52	265		126	265		39	265		131	265
154	266		268	266		148	266		343	266		182	266
87	267		327	267		264	267		346	267		292	267
412	268		386	268		400	268		314	268		400	268
161	269		378	269		313	269		396	269		234	269
34	270		142	270		218	270		107	270		65	270
201	271		421	271		406	271		407	271		322	271
382	272		161	272		260	272		94	272		165	272
107	273		156	273		191	273		179	273		216	273
285	274		244	274		335	274		138	274		339	274
21	275		27	275		45	275		26	275		24	275
142	276		364	276		385	276		302	276		287	276
297	277		330	277		411	277		103	277		306	277
276	278		310	278		328	278		303	278		289	278
278	279		121	279		243	279		82	279		350	279
82	280		131	280		101	280		186	280		45	280
411	281		216	281		245	281		220	281		298	281
134	282		153	282		123	282		212	282		91	282
375	283		374	283		356	283		365	283		333	283
292	284		252	284		154	284		318	284		218	284
140	285		339	285		287	285		361	285		304	285
359	286		367	286		299	286		389	286		236	286
153	287		322	287		302	287		312	287		276	287
374	288		425	288		426	288		414	288		411	288
437	289		430	289		433	289		416	289		436	289
307	290		338	290		236	290		383	290		296	290
272	291		363	291		286	291		384	291		196	291
31	292		29	292		38	292		34	292		31	292
191	293		190	293		297	293		128	293		120	293
123	294		18	294		20	294		21	294		28	294
73	295		318	295		193	295		388	295		132	295
52	296		82	296		71	296		161	296		34	296
335	297		316	297		132	297		401	297		369	297
210	298		207	298		110	298		294	298		195	298
420	299		387	299		343	299		394	299		404	299
57	300		49	300		112	300		35	300		50	300
20	301		21	301		24	301		25	301		23	301
97	302		87	302		79	302		165	302		137	302
395	303		407	303		438	303		102	303		375	303
428	304		382	304		395	304		334	304		406	304
174	305		336	305		320	305		325	305		315	305
171	306		144	306		278	306		63	306		162	306
72	307		73	307		51	307		178	307		44	307
69	308		32	308		47	308		43	308		37	308
377	309		317	309		332	309		307	309		294	309
415	310		408	310		410	310		351	310		410	310
371	311		332	311		277	311		356	311		302	311
245	312		160	312		205	312		145	312		145	312
184	313		411	313		241	313		433	313		380	313
214	314		389	314		392	314		358	314		391	314
17	315		17	315		19	315		19	315		20	315
6	316		24	316		31	316		5	316		6	316
131	317		230	317		322	317		168	317		87	317
287	318		294	318		340	318		230	318		272	318
389	319		418	319		415	319		400	319		414	319
249	320		272	320		307	320		236	320		135	320
344	321		158	321		103	321		232	321		273	321
51	322		304	322		275	322		324	322		95	322
50	323		81	323		108	323		106	323		40	323
277	324		313	324		357	324		258	324		318	324
270	325		182	325		235	325		171	325		156	325
203	326		132	326		155	326		149	326		254	326
152	327		245	327		197	327		275	327		208	327
138	328		233	328		353	328		120	328		140	328
108	329		366	329		397	329		265	329		293	329
195	330		319	330		334	330		269	330		311	330
3	331		3	331		3	331		3	331		3	331
5	332		23	332		5	332		30	332		5	332
352	333		231	333		178	333		300	333		309	333
265	334		69	334		173	334		37	334		128	334
296	335		275	335		268	335		289	335		265	335
16	336		15	336		17	336		17	336		18	336
127	337		279	337		319	337		247	337		330	337
216	338		176	338		121	338		250	338		129	338
102	339		39	339		26	339		121	339		30	339
239	340		323	340		198	340		375	340		299	340
199	341		324	341		199	341		376	341		263	341
77	342		95	342		141	342		86	342		101	342
323	343		352	343		105	343		417	343		282	343
144	344		343	344		293	344		367	344		290	344
126	345		334	345		75	345		418	345		170	345
112	346		221	346		140	346		271	346		365	346
99	347		111	347		41	347		249	347		96	347
7	348		5	348		6	348		6	348		7	348
433	349		409	349		412	349		355	349		405	349
23	350		22	350		27	350		27	350		26	350
188	351		238	351		294	351		216	351		251	351
422	352		419	352		418	352		403	352		426	352
280	353		403	353		427	353		306	353		388	353
68	354		211	354		234	354		211	354		246	354
243	355		295	355		204	355		344	355		300	355
343	356		267	356		339	356		185	356		351	356
141	357		234	357		86	357		363	357		178	357
397	358		235	358		354	358		123	358		288	358
372	359		306	359		346	359		244	359		303	359
79	360		266	360		146	360		342	360		271	360
218	361		381	361		230	361		419	361		344	361
181	362		179	362		122	362		251	362		172	362
130	363		337	363		349	363		297	363		280	363
444	364		432	364		420	364		437	364		443	364
204	365		102	365		34	365		238	365		150	365
49	366		139	366		162	366		158	366		326	366
275	367		93	367		184	367		81	367		198	367
12	368		9	368		11	368		11	368		12	368
365	369		326	369		303	369		316	369		358	369
132	370		88	370		120	370		113	370		123	370
390	371		191	371		92	371		272	371		323	371
67	372		180	372		177	372		209	372		98	372
159	373		273	373		369	373		148	373		291	373
333	374		341	374		289	374		364	374		396	374
125	375		84	375		279	375		23	375		81	375
200	376		128	376		200	376		89	376		133	376
160	377		205	377		310	377		97	377		328	377
205	378		396	378		267	378		423	378		378	378
74	379		33	379		28	379		84	379		27	379
353	380		400	380		393	380		382	380		242	380
155	381		249	381		203	381		283	381		159	381
360	382		97	382		143	382		87	382		229	382
373	383		398	383		348	383		413	383		390	383
115	384		347	384		366	384		279	384		243	384
262	385		109	385		172	385		110	385		115	385
213	386		335	386		403	386		166	386		343	386
85	387		271	387		262	387		286	387		204	387
197	388		427	388		390	388		435	388		432	388
244	389		269	389		151	389		345	389		313	389
65	390		175	390		174	390		206	390		117	390
106	391		217	391		189	391		264	391		67	391
173	392		145	392		113	392		202	392		169	392
305	393		415	393		432	393		253	393		412	393
355	394		285	394		330	394		260	394		371	394
331	395		232	395		181	395		301	395		189	395
392	396		292	396		255	396		311	396		401	396
398	397		214	397		242	397		214	397		332	397
179	398		210	398		82	398		329	398		119	398
117	399		248	399		202	399		280	399		193	399
168	400		141	400		164	400		160	400		80	400
346	401		328	401		212	401		378	401		335	401
78	402		99	402		99	402		140	402		55	402
308	403		365	403		291	403		386	403		349	403
84	404		224	404		259	404		188	404		223	404
56	405		48	405		74	405		66	405		42	405
319	406		196	406		256	406		141	406		321	406
410	407		257	407		384	407		122	407		367	407
47	408		437	408		425	408		441	408		362	408
196	409		194	409		56	409		309	409		423	409
158	410		202	410		342	410		52	410		107	410
434	411		151	411		229	411		115	411		337	411
114	412		98	412		57	412		182	412		64	412
446	413		442	413		442	413		442	413		444	413
409	414		185	414		325	414		80	414		382	414
364	415		325	415		367	415		229	415		408	415
341	416		405	416		405	416		340	416		366	416
101	417		309	417		175	417		381	417		259	417
136	418		362	418		352	418		333	418		331	418
388	419		372	419		404	419		252	419		373	419
228	420		189	420		192	420		222	420		180	420
241	421		247	421		257	421		228	421		312	421
8	422		6	422		7	422		7	422		8	422
40	423		40	423		48	423		77	423		29	423
81	424		130	424		149	424		142	424		158	424
185	425		311	425		394	425		175	425		173	425
83	426		59	426		33	426		144	426		89	426
175	427		148	427		225	427		111	427		116	427
286	428		193	428		336	428		51	428		207	428
299	429		422	429		377	429		430	429		372	429
328	430		371	430		375	430		323	430		310	430
212	431		86	431		171	431		69	431		215	431
380	432		431	432		428	432		432	432		403	432
440	433		355	433		217	433		398	433		389	433
44	434		222	434		144	434		274	434		185	434
435	435		346	435		365	435		277	435		413	435
321	436		350	436		207	436		392	436		203	436
177	437		410	437		321	437		424	437		245	437
329	438		333	438		378	438		243	438		336	438
439	439		445	439		445	439		445	439		446	439
269	440		360	440		351	440		330	440		261	440
150	441		414	441		301	441		429	441		434	441
236	442		429	442		435	442		405	442		433	442
100	443		209	443		227	443		207	443		188	443
119	444		199	444		150	444		231	444		214	444
113	445		340	445		94	445		362	445		212	445
224	446		368	446		288	446		422	446		281	446
