# Supplementary material for: Exosome component 1 cleaves single-stranded DNA and sensitizes human kidney renal clear cell carcinoma cells to poly(ADP-ribose) polymerase inhibitor
Source: eLife. 2021 Jun 23;10:e69454. doi: 10.7554/eLife.69454 (PMC8260222; doi:10.7554/eLife.69454)
Supplement: Figure 5—figure supplement 1—source data 1. [file elife-69454-fig5-figsupp1-data1.xlsx]

## Sheet: B
Vector	shEXOSC1-1	shEXOSC1-2
112.4	16.1	22.8
99.8	14.8	26.4
91.2	19.3	31.3

## Sheet: E
	Vector	shXRCC1-1	shXRCC1-2
	95.9	26.8	21.6
	105	11.5	21.1
EXOSC1	104.9	16	12.2
	98.7	14.3	17.2
	95.5	17.4	23.9
	94.4	18.2	24.6
	101.5	10.7	22.8
XRCC1	101	21.7	20.3
	104	11.7	27.7
	99	14.2	28.7
