# Supplementary material for: Exosome component 1 cleaves single-stranded DNA and sensitizes human kidney renal clear cell carcinoma cells to poly(ADP-ribose) polymerase inhibitor
Source: eLife. 2021 Jun 23;10:e69454. doi: 10.7554/eLife.69454 (PMC8260222; doi:10.7554/eLife.69454)
Supplement: Figure 6—figure supplement 1—source data 1. [file elife-69454-fig6-figsupp1-data1.xlsx]

## Sheet: A
		Expression level(FPKM)
EXOSC1	TBP	APOBEC3A	APOBEC3B	BRAF	BRCA1	POLQ
333.093	274.127	23.2099	57.711	87.8211	85.9392	10.664
240.691	247.167	9.1743	21.5866	93.3621	45.8716	3.238
308.489	193.064	20.1863	165.114	200.828	182.195	13.9752
199.083	294.954	64.6789	71.1009	144.495	117.89	18.3486
187.636	266.086	20.1858	45.8768	213.327	151.852	42.6654
202.435	237.786	23.345	81.7075	215.441	171.752	45.6895
228.043	169.492	9.245	81.2789	356.703	335.901	38.5208
157.143	259.184	19.7279	60.5442	125.85	120.408	20.4082
204.646	194.69	10.3245	56.4159	250.738	163.717	33.1858
290.206	132.996	13.0105	214.311	145.645	239.248	125.407
147.925	176.944	28.665	14.5094	344.687	131.647	14.1555
156.387	253.357	16.1616	47.0588	312.775	183.482	17.5876
184.096	269.398	17.8313	36.1446	281.928	206.747	18.3133
231.038	231.737	17.1269	33.5547	296.4	171.618	17.8259
207.588	305.637	7.7478	35.533	102.591	137.59	24.8464
158.28	308.326	66.7887	93.3211	161.025	139.982	31.107
104.879	287.642	26.6853	212.551	150.493	162.284	37.2353
270.443	289.589	17.3434	38.1013	145.194	76.1867	15.1576
112.599	231.022	35.5917	75.7131	305.441	258.525	23.2964
323.554	173.931	24.7276	49.8743	308.047	107.712	9.2205
215.934	299.207	95.5299	32.0836	197.909	78.9474	10.4542
357.897	176.528	186.212	436.697	90.2448	161.56	56.7882
249.459	220.875	14.2919	97.0117	196.189	264.617	112.603
187.298	277.913	32.8762	43.5801	123.786	118.123	21.8447
183.952	266.325	32.0102	67.8617	270.166	169.868	37.5587
224.848	253.21	40.626	78.9524	177.323	141.297	21.2073
201.869	234.568	18.018	55.7224	226.226	156.823	23.3567
319.338	286.896	12.7226	55.0254	228.053	144.084	30.8524
166.742	278.206	32.3879	44.1867	201.178	111.01	19.4835
191.712	277.322	36.4299	50.5464	167.122	114.299	15.4827
443.396	373.652	6.0647	51.5499	178.908	146.9	10.1078
264.656	387.851	20.3908	22.0901	115.548	115.123	4.6729
237.675	249.329	12.8805	53.362	256.996	184.62	29.4411
169.667	256.683	21.2766	52.9187	223.95	259.138	34.0971
175.322	254.797	46.0476	46.7298	313.806	139.507	28.6518
181.883	226.356	13.9691	60.7227	286.508	177.607	19.9558
232.99	211.179	20.6568	199.445	600.818	23.299	4.9572
208.553	260.94	92.3593	63.0625	278.071	186.208	28.0554
206.935	232.289	52.9456	113.721	238.255	285.235	68.9784
238.117	333.003	24.894	33.5528	84.784	142.87	14.4313
236.343	201.211	7.9846	32.7368	340.143	138.532	15.5699
334.409	250.538	41.9355	185.484	60.2151	123.118	27.957
168.081	233.336	10.6649	114.572	470.957	226.745	55.3679
272.135	258.138	11.3932	86.9141	259.115	213.867	115.234
295.2	269.578	17.3223	47.2754	83.0025	143.27	23.4572
242.897	284.514	65.6263	21.6086	131.653	108.844	18.0072
236.989	275.093	48.6896	2.8903	135.688	127.788	24.1636
217.841	281.776	12.2511	40.5819	187.596	125.574	9.1884
204.409	198.72	18.2871	45.1082	174.744	138.982	21.1318
265.746	292.564	13.8155	55.6684	78.8297	106.729	23.974
299.252	289.277	117.966	30.7926	116.665	123.17	5.6381
233.346	301.13	9.739	23.3736	133.619	98.5586	22.5945
259.35	216.79	9.31	32.9175	128.345	145.303	28.9275
362.451	261.687	14.0368	103.271	156.411	89.7356	15.0395
591.597	172.869	36.4946	215.126	46.0984	146.459	98.4394
851.052	491.014	11.5397	39.8119	167.325	33.4651	4.6159
158.964	237.395	250	65.8263	317.227	86.1345	17.507
328.155	247.529	19.0012	88.3297	119.142	94.4922	10.2709
271.196	195.957	45.4801	82.5379	129.702	77.4846	7.8608
135.755	182.919	3.8241	131.931	264.5	17.2084	5.0988
279.772	160.756	13.7178	62.9937	82.3521	113.375	16.9217
509.489	167.952	6.6566	101.898	88.5845	54.7893	9.7289
148.444	216.569	13.1876	217.679	447.435	24.8108	103.869
117.473	309.312	1.6025	65.8539	302.402	124.383	8.5554
165.564	244.499	16.0025	73.3959	177.412	100.015	12.7712
220.39	217.891	4.4978	69.4653	97.4513	114.942	27.986
830.561	159.946	8.6718	234.137	131.04	5.7812	0
256.067	208.857	28.3259	33.9911	62.3171	65.7162	6.4205
460.753	177.409	6.4582	72.6739	45.3095	33.1844	3.829
427.591	179.334	2.7603	5.2696	274.02	91.0053	8.0299
203.107	143.268	25.7998	15.9148	203.97	113.349	14.0967
369.081	307.335	19.0344	41.3185	82.637	93.3148	15.3203
193.772	221.453	12.8522	16.8067	289.175	71.6757	4.9432
442.969	251.66	18.105	138.202	79.0585	76.041	18.7085
235.872	242.015	6.1425	70.6388	129.607	121.007	11.0565
147.771	209.787	74.1279	54.2636	266.473	116.764	20.8333
127.768	165.673	7.2402	123.509	273.85	84.3271	27.2572
384.352	127.139	26.8949	567.237	199.511	145.232	67.4817
183.681	262.098	26.1392	44.8605	152.243	139.173	38.8555
258.909	246.056	43.2324	1000.12	162.691	810.515	318.771
319.445	241.259	59.1978	210.729	225.994	420.341	204.4
532	314	12.965	34.535	65.5	124.5	34.5
209.486	240.589	43.9098	24.2419	189.361	93.7657	13.7218
251.945	161.912	44.4609	55.9466	128.566	77.4361	12.5973
481.804	194.259	2.5628	58.9441	129.677	504.357	78.9339
556.143	237.781	13.21	104.359	38.3091	113.606	95.1123
506.166	221.524	58.2152	617.082	125.929	720.95	350.823
302.587	201.799	28.8284	312.867	246.271	285.156	198.67
410.969	205.963	33.0499	80.4694	84.3013	148.485	39.7557
263.496	281.063	18.8518	95.1157	156.384	224.079	71.9794
244.758	256.576	6.4811	176.134	165.841	253.526	78.1548
317.287	233.044	18.1082	50.3879	84.636	103.138	56.2928
319.447	165.553	9.3269	261.153	29.5352	181.875	57.5159
230.657	333.091	31.9978	98.4054	259.353	322.557	76.6437
589.168	189.344	15.4117	278.732	94.672	130.339	65.6099
309.166	222.626	16.5153	76.6309	35.673	79.2733	56.8126
335.219	284.319	21.0797	34.9614	141.902	98.2005	47.3008
214.081	307.309	8.287	36.6009	111.184	91.1569	15.1928
376.802	185.655	27.7968	192.176	69.6637	135.209	48.3871
403.95	372.35	25.2798	133.772	107.439	172.745	65.3061
289.806	193.658	23.8663	157.518	45.687	112.513	33.4129
326.078	292.787	13.2309	98.1647	196.756	148.101	25.1814
417.611	279.142	14.3244	141.04	134.796	203.48	76.764
270.216	295.004	45.9031	46.2092	118.124	100.069	19.8914
352.122	229.443	447.613	102.785	51.061	49.7347	22.5464
327.048	258.828	60.336	48.6802	113.13	75.42	15.084
364.955	221.423	82.2987	45.0683	102.383	77.3999	30.862
535.635	278.442	4.8694	74.8119	36.2992	113.325	81.0093
481.009	210.364	11.6869	67.046	51.0534	95.3406	37.5211
267.862	192.771	16.4378	49.6871	123.657	109.088	5.2302
232.871	191.035	22.6823	64.0144	94.2574	116.94	44.3564
225.11	203.923	27.1456	110.237	192.998	229.082	25.8214
274.504	249.602	38.2221	75.2859	77.0233	93.8179	43.4342
330.134	264.875	22.3928	45.4255	67.8183	74.2163	21.1132
261.479	285.645	6.1721	63.4268	404.06	98.115	16.4331
170.624	154.527	37.5587	247.887	130.382	194.769	29.5104
252.94	145.908	28.3177	147.348	130.55	152.148	18.7185
238.92	245.389	10.5109	43.2563	280.155	155.238	42.852
478.366	189.052	31.4255	37.9102	82.3049	57.8629	5.487
455.076	165.694	23.3372	51.3419	45.5076	64.9942	4.6674
408.558	127.44	9.9953	31.2354	33.1095	53.7248	11.8694
348.701	219.481	27.9221	100	70.7792	87.6623	32.4675
273.749	150.084	23.0467	47.7797	56.2114	71.3884	18.5497
246.069	321.462	38.8529	112.396	140.611	154.024	31.4524
186.469	281.449	17.4596	25.8402	201.135	131.646	33.1733
499.041	215.974	45.3674	97.1246	43.4505	133.546	78.5942
269.285	158.069	10.885	79.5078	132.513	97.0185	12.3048
282.109	191.812	72.9108	17.9473	120.022	66.7414	9.5345
277.444	274.774	21.6033	89.8113	253.171	315.796	71.6063
229.204	264.778	3.1521	11.7079	97.2654	81.5048	10.357
262.354	220.091	13.0039	35.1105	159.623	125.162	35.4356
248.425	246.82	7.224	66.6212	208.292	202.272	47.7586
309.67	242.901	7.6746	57.5595	141.596	128.933	21.8726
368.689	223.393	22.5209	183.073	102.07	177.624	104.25
215.933	139.169	17.12	120.944	167.886	38.1058	4.4181
1019.73	191.03	17.5078	277.402	148.622	424.856	106.214
347.998	245.347	15.2284	45.1213	69.3739	58.0936	15.7924
313.621	282.335	26.7074	50.3625	85.4636	84.7005	21.3659
389.94	304.283	18.4263	139.442	61.753	144.92	79.1833
361.258	241.446	8.4342	44.7348	200.294	140.934	29.8621
240.57	253.982	10.4778	87.1752	152.557	184.409	35.6245
250.577	254.269	29.9954	136.133	186.433	121.827	36.9174
223.111	198.033	47.13	117.609	175.549	264.62	52.7511
700.136	352.621	5.7862	84.7515	166.78	503.404	182.437
107.519	292.949	14.8033	112.193	164.784	201.184	12.4659
505.573	214.445	5.7958	10.7	52.6081	68.658	9.8083
307.242	119.381	16.479	43.944	87.5217	110.959	12.0846
192.358	256.695	87.8511	34.9445	310.908	101.894	16.3292
264.494	247.99	11.8493	4.6551	121.033	79.5599	10.5798
415.983	261.85	2.6273	66.1193	75.7526	191.79	125.233
277.673	211.632	45.4034	38.6492	169.231	129.456	18.7617
625.716	203.435	84.5443	137.825	134.302	276.971	231.616
147.984	259.341	8.5091	20.7177	241.214	116.537	16.6482
219.266	301.785	8.0835	18.8616	355.339	139.104	19.5352
246.663	264.104	20.6442	46.9834	202.527	125.289	23.8477
246.436	208.147	7.2994	198.403	144.196	156.823	59.8778
168.439	172.114	12.2501	373.629	208.252	32.4628	15.9252
199.182	138.591	12.1877	96.8051	182.119	149.038	21.9378
201.715	263.236	11.5585	44.7427	123.415	287.845	18.2699
382.277	211.044	49.6575	66.3527	148.973	115.582	18.8356
313.333	252.168	10.7306	80.837	113.029	110.167	30.761
432.647	193.5	13.8923	42.6693	53.5847	85.3386	9.4269
144.287	141.048	19.7291	37.3969	259.128	131.92	15.0177
225.715	205.159	71.7453	82.628	176.139	182.588	16.9287
182.068	218.922	16.6832	6.9692	251.375	136.964	20.9021
363.524	191.025	16.056	122.272	116.921	188.967	20.5846
212.626	288.536	20.914	91.7893	207.978	223.857	22.0759
283.227	230.993	23.7957	47.5914	132.908	112.594	13.9292
234.397	237.143	14.3446	30.5204	191.973	85.7622	12.8186
328.465	179.551	22.4439	81.938	92.9818	81.2255	13.1813
316.195	197.063	26.1899	61.642	126.159	127.436	27.4674
182.724	205.98	71.4286	39.8671	174.419	98.0066	9.9668
170.266	223.363	27.9646	132.743	219.115	123.894	40.708
328.925	184.014	20.7016	75.9057	78.7809	126.51	4.0253
295.924	253.987	24.808	40.7561	205.552	136.444	70.2894
274.032	40.1722	7.1736	30.1291	28.6944	131.994	0
154.474	229.416	29.0594	92.7861	223.298	148.356	15.8042
223.588	211.882	17.2666	74.9195	269.242	167.106	19.9005
214.64	162.531	12.4069	65.7568	203.474	218.362	31.0174
359.75	238.232	13.4486	46.5898	94.1402	82.757	12.0077
236.033	210.897	32.4929	96.559	223.465	180.55	37.704
246.485	205.128	19.8511	52.1092	223.325	145.988	18.6104
205.581	214.059	26.1392	58.9898	246.203	165.313	25.4327
271.906	215.458	9.5923	76.3697	142.409	215.458	19.5536
211.626	213.912	74.7877	61.3978	195.297	146.963	21.5545
216.314	236.276	22.1222	58.0545	170.171	144.318	14.7263
115.035	177.688	9.7574	240.855	399.541	34.9214	13.8658
269.112	252.51	18.5328	108.88	277.606	185.328	22.3938
365.636	269.416	28.1787	26.8041	166.323	162.199	16.4948
409.577	383.07	30.2822	49.239	120.564	79.9487	9.4057
223.602	253.002	23.6025	45.5487	244.306	152.381	20.7039
189.526	238.333	20.6626	21.7314	232.633	175.989	35.6252
212.621	180.097	4.3689	14.5631	157.282	259.223	12.1359
222.662	219.493	22.5832	27.7338	137.876	156.894	20.9984
205.623	235.423	11.1752	14.9002	195.193	120.692	8.9401
258.226	216.738	25.0358	114.449	208.87	128.04	43.6338
263.676	136.397	12.3997	77.6805	203.501	203.866	24.4347
180.118	325.909	9.2566	38.1834	167.775	165.461	26.6127
197.615	152.968	20.2943	74.0741	262.557	162.101	28.9193
210.429	277.286	17.5614	34.8148	226.142	176.539	17.8695
100.624	199.822	11.0972	21.0169	106.334	156.289	52.81
211.734	213.284	20.1504	29.1405	197.784	113.462	13.6402
426.036	178.298	22.4389	250.467	152.221	569.16	140.092
169.731	233.63	37.2743	94.8498	194.026	188.701	28.9542
108.33	195.511	8.6319	163.142	157.963	242.987	44.0224
243.21	237.449	11.1111	139.095	180.658	265.844	40.7407
179.479	195.315	75.4112	35.0662	162.888	121.412	15.4593
365.757	292.308	85.8561	127.047	91.8114	278.908	104.715
112.688	271.903	11.9475	74.276	266.354	502.401	115.676
190.953	193.178	36.7075	101.594	230.627	171.301	57.1005
231.474	324.713	37.5739	47.3153	177.664	40.3572	13.4524
323.221	222.555	6.5297	20.6775	65.2972	60.9441	12.5153
275.957	310.304	58.034	126.727	142.913	97.118	13.028
270.814	264.41	3.2022	27.9048	475.297	155.535	16.011
203.688	183.152	340.318	122.8	266.555	168.483	17.1836
300.025	193.131	27.5432	56.726	238.708	168.866	20.0016
212.37	214.965	28.1142	51.0381	278.547	122.405	35.0346
174.782	141.475	54.2427	268.993	208.089	425.694	111.657
181.868	172.282	8.4908	88.7428	560.12	256.138	20.8162
306.081	219.959	19.3968	114.053	134.613	192.416	27.5434
281.207	174.094	20.7584	118.461	184.611	287.849	57.8467
224.735	223.33	10.6749	76.4099	260.411	182.316	47.1943
194.157	184.419	20.3895	31.9537	274.193	157.638	16.7377
245.963	214.019	31.9432	52.8838	175.688	175.333	20.9406
217.283	207.792	4.5504	20.9241	231.269	59.4406	11.988
166.478	185.845	19.7795	87.7717	268.26	221.284	17.7192
200.925	187.564	14.3885	157.246	334.019	212.744	19.5272
257.887	181.07	37.9515	200.732	136.717	203.475	100.137
200.332	215.84	17.09	46.2062	189.572	170.9	19.3053
183.904	158.165	12.0228	31.6217	227.548	128.695	19.7706
207.233	248.269	7.1813	15.3886	109.772	242.113	96.435
278.017	176.724	32.3276	14.0086	182.651	136.853	35.0216
179.775	335.35	0	0	191.875	125.324	13.8289
363.419	199.14	22.4451	122.254	96.4661	149.952	88.3477
229.408	258.404	10.2338	32.1228	139.294	115.415	7.9596
468.244	219.801	9.34	67.8705	68.4932	94.0224	41.7186
263.238	275.34	46.8986	59.3797	141.831	113.464	17.7761
203.337	301.422	12.0927	32.2472	176.464	218.117	16.1236
231.939	320.478	76.5888	74.4161	96.6866	131.45	22.2705
211.713	268.106	50.1803	25.807	160.099	118.043	14.8151
266.091	285.529	12.095	34.5572	167.603	161.555	14.2549
518.595	181.685	101.72	76.4369	87.6084	72.909	5.2918
239.411	158.299	16.3532	75.879	168.765	105.969	21.5863
194.373	227.973	28.1805	72.619	214.605	124.283	37.2127
186.41	211.444	31.7389	45.5968	273.134	155.119	33.527
244.327	253.298	13.1926	44.8549	259.631	129.288	29.5515
103.853	206.589	17.8671	53.6013	235.623	128.42	17.8671
360.529	253.873	33.5492	47.0691	72.1058	65.0955	13.0191
205.414	228.186	20.4485	72.0344	146.857	82.7234	7.9005
360.045	183.409	12.4153	111.738	46.8397	83.5214	29.9097
213.448	306.724	220.029	101.574	216.309	148.784	36.3376
190.15	250.411	18.1095	60.2609	287.879	116.151	12.4893
292.127	204.132	27.0752	151.763	237.264	242.251	86.9255
260.941	198.183	14.8637	83.815	242.362	115.194	18.9926
335.301	170.748	73.565	73.9522	206.756	95.6345	20.9079
315.214	238.291	4.1026	23.9316	118.632	147.35	4.1026
189.734	181.369	14.0684	94.2966	311.787	185.932	63.1179
238.055	234.25	43.129	86.6808	209.302	134.884	26.2156
193.187	173.351	2.5873	53.0401	112.549	94.8685	13.7991
201.344	212.754	26.8703	37.9129	161.59	88.3408	4.049
171.058	231.45	25.6112	70.5099	290.893	182.124	30.0379
262.642	210.849	15.0169	27.582	132.393	159.056	30.9531
208.013	330.897	12.5844	42.1949	136.948	101.786	15.1753
246.575	131.849	23.1164	287.671	190.069	22.2603	10.274
332.052	329.746	40.7379	43.0438	123.751	90.6995	33.0515
314.171	204.1	13.369	69.5187	114.973	143.494	29.8574
267.946	194.03	9.9502	254.797	186.567	182.303	47.619
240.153	237.801	16.7549	25.8671	279.835	139.918	28.2187
295.571	286.754	20.9922	15.1144	136.869	80.6102	10.0763
173.249	211.946	21.4219	131.591	186.74	151.593	39.0521
408.919	275.605	14.3638	44.4379	273.361	92.4668	19.3013
228.809	228.413	24.5861	24.5861	152.672	99.1375	10.3103
293.267	245.766	13.2177	137.547	110.698	145.808	37.1747
233.461	191.827	10.8948	140.466	178.598	205.835	48.2486
239.355	299.656	16.6623	49.7223	171.119	138.588	21.4229
237.653	279.614	6.3127	11.14	129.967	101.374	10.3973
306.27	266.577	21.6509	116.374	113.216	135.318	32.9274
545.255	253.515	7.3155	115.707	72.935	130.053	56.6784
288.387	241.232	13.2502	39.7506	225.253	183.944	31.5666
276.928	276.928	73.0182	171.998	146.577	336.424	204.992
230.773	294.7	25.3896	9.0677	110.626	126.495	9.5211
200.638	224.034	2.4814	27.2953	190.713	90.748	14.5339
464.05	237.855	5.8298	51.302	78.1189	137.194	17.4893
323.397	208.118	15.3998	205.918	226.598	112.199	18.4798
210.181	213.824	8.3781	13.8421	141.699	207.267	11.2922
509.755	108.054	5.5028	155.578	28.014	58.029	33.0165
270.513	194.829	17.9843	86.1746	182.84	139.378	13.1135
309.02	274.506	14.0464	69.4291	153.306	164.944	14.849
213.887	316.68	38.3081	53.9505	156.425	165.044	15.9617
81.9587	248.243	27.8127	97.0486	366.003	189.659	46.1573
233.8	233.149	14.6532	25.3989	300.554	160.86	29.9577
210.023	310.252	6.5034	8.0337	138.102	65.7995	4.2081
695.451	252.504	14.8949	219.523	139.728	141.502	30.4991
253.753	280.483	42.8415	122.666	157.452	149.396	65.9099
221.871	317.737	17.4301	67.9049	127.095	84.2456	14.162
116.087	198.76	45.8147	219.773	382.363	613.848	108.508
435.952	278.839	11.3234	47.4168	64.402	73.6023	12.0311
292.52	164.567	25.1969	124.803	98.8189	150.394	46.063
269.195	146.799	26.2812	32.2883	289.469	140.041	15.0178
230.571	180.111	7.7348	43.0939	111.971	95.7643	16.2063
283.041	228.105	6.3694	43.7898	111.465	99.9204	5.5732
302.49	181.587	41.2276	44.9334	161.668	135.263	51.8819
170.619	229.734	8.1416	37.8761	227.965	140.885	13.0973
177.879	220.987	3.6302	40.8395	199.206	173.341	14.0669
255.446	200	14.1914	11.8812	150.825	137.294	7.5908
212.839	182.3	12.1533	97.5382	194.453	111.873	26.488
335.23	250.305	11.3775	72.3283	177.164	132.466	54.8557
417.213	256.599	11.8061	6.111	182.371	42.8731	1.2798
233.668	205.312	18.3058	31.2276	205.671	114.86	6.8198
188.679	249.811	4.1509	40.7547	293.207	110.189	12.4528
296.53	212.217	24.0895	119.874	94.0637	103.241	30.9722
150.151	203.874	22.4996	43.1626	173.569	136.375	17.9079
255.939	122.268	5.7016	31.0421	199.556	117.833	16.7881
350.786	189.444	81.3979	50.8737	127.911	80.9134	29.0707
201.372	231.55	5.2126	14.8148	249.108	139.095	12.62
364.451	128.454	6.7214	44.4361	112.397	87.3786	22.0314
194.684	188.486	31.3536	88.5921	237.339	148.747	43.3846
240.37	269.889	8.1096	64.8771	170.951	125.862	17.5168
200.327	219.216	16.0914	80.9235	225.28	180.037	34.9813
177.534	241.769	3.8735	10.652	337.637	250.484	84.5707
394.995	207.748	22.8933	118.225	61.5043	105.924	24.9434
260.634	233.528	2.5021	27.9399	219.767	65.4712	47.5396
202.975	209.213	10.3167	42.4664	260.077	177.063	23.2726
333.479	294.108	12.599	44.0964	155.912	139.77	58.2703
201.8	249.645	32.2122	32.9228	271.199	174.562	27.4751
177.759	276.639	30.1571	15.1983	482.288	138.883	34.0869
223.575	324.352	17.6166	32.3834	182.902	208.031	30.0518
222.102	243.752	15.2823	92.9671	284.76	120.475	18.084
193.614	192.106	3.5203	58.8386	238.623	184.562	21.8759
228.429	252.948	7.7592	34.761	232.464	176.288	54.0037
522.822	277.49	22.3029	26.971	92.8423	82.4689	17.1162
177.861	238.313	11.8216	56.1526	279.688	149.651	37.0768
323.868	161.934	18.2556	117.647	150.101	565.923	286.342
376.699	310.68	40.7767	82.3301	171.65	136.311	19.4175
272.229	251.526	1.854	8.961	230.514	130.707	22.866
166.991	183.161	19.902	45.4015	327.451	130.607	27.0543
299.078	280.184	12.4424	85.7143	128.571	231.336	130.876
379.234	264.014	60.2807	110.642	172.449	176.264	83.9352
138.625	270.371	41.0054	49.4711	245.504	218.784	23.5451
378.976	242.218	34.0194	29.2567	81.6465	64.6368	56.4722
302.349	146.821	8.7064	37.9915	155.923	72.4213	8.3106
152.682	195.433	16.4631	198.885	357.674	62.9315	13.2767
171.268	199.551	21.474	151.365	344.631	86.1579	10.9989
217.065	257.423	10.3776	21.6201	326.031	162.006	30.8446
178.822	270.394	19.9892	31.8747	263.371	133.712	12.1556
506.335	177.376	12.6697	101.358	63.8009	114.48	19.0045
334.821	294.643	15.377	49.1071	46.627	98.2143	30.754
194.292	258.183	4.1896	294.58	250.327	154.491	36.9207
259.931	260.571	24.2986	78.9705	130.445	91.7593	11.5099
238.378	261.457	18.1339	40.5539	142.763	122.981	21.7606
218.037	254.026	68.98	66.5807	216.837	177.548	22.7934
321.697	277.778	1.8769	41.6667	115.991	102.853	34.5345
357.444	236.89	12.0555	53.044	65.0995	77.7577	29.5359
271.365	207.463	20.1335	59.0874	113.36	99.7921	7.4406
683.354	181.477	5.0063	72.5907	71.3392	131.414	60.7009
391.969	261.95	1.434	17.2084	128.107	72.1797	9.0822
308.307	235.721	23.0956	210.426	121.343	289.978	27.8613
309.262	230.926	10.0938	93.1293	70.5834	84.0473	31.4157
939.239	122.455	8.7024	49.1064	31.7016	94.4833	44.7552
290.081	195.122	7.8049	41.3008	99.5122	90.0813	4.878
361.877	205.694	10.8023	60.7629	136.829	99.021	17.1036
461.669	188.48	12.7065	168.996	91.9102	94.028	19.0597
211.262	145.286	22.1088	96.8575	129.143	144.935	15.792
223.003	122.707	36.0037	138.504	191.775	170.467	18.3693
270.92	215.454	30.1379	69.8942	151.651	136.903	14.7483
324.929	247.859	13.7964	61.8459	166.032	249.762	27.5928
220.179	258.744	14.7982	95.9641	134.529	150.673	22.4215
440.922	120.077	6.7243	190.202	40.3458	76.8492	14.4092
190.812	247.459	6.9567	42.0714	151.391	142.446	13.9134
261.091	261.091	5.0909	66.9091	255.273	182.546	21.8182
227.148	192.111	17.6379	48.6235	282.445	190.919	24.3118
407.373	220.276	3.682	31.8018	98.1567	121.659	14.7465
737.21	144.835	33.312	112.247	44.8988	62.279	67.3482
225.246	231.803	1.9672	43.9344	134.754	129.18	10.1639
211.26	223.802	5.5741	33.4448	278.428	132.665	18.6734
245.468	202.894	16.6306	43.9049	159.321	146.35	14.3023
354.813	320.983	3.6246	70.4793	124.043	102.698	26.178
210.234	222.269	10.1544	175.634	220.389	220.765	64.3115
354.655	244.139	13.3958	61.286	129.27	123.577	22.1031
172.158	210.386	44.3761	78.8612	277.485	221.881	15.7722
363.107	207.379	15.1456	147.185	133.981	178.252	45.0485
229.864	250.707	8.0393	59.8481	253.685	154.533	17.5674
182.403	158.777	12.5076	50.3778	237.644	136.194	20.4986
155.438	185.926	1.4994	48.4808	240.905	278.39	39.9842
341.943	240.724	18.3558	66.081	138.98	170.971	34.0894
282.535	217.734	23.7606	154.66	125.283	217.302	101.091
320.558	247.387	7.6655	108.014	48.0836	161.673	47.3868
145.738	249.2	5.0063	17.8	231.957	158.531	25.5875
368.654	227.719	13.5381	97.1969	115.248	149.614	36.4488
214.749	276.742	5.1256	50.3849	149.919	151.135	51.4587
357.664	240.876	36.4964	124.088	423.358	321.168	51.0949
184.478	220.758	26.2035	6.6535	296.398	121.16	21.2202
223.033	209.981	74.4722	66.0269	210.365	161.612	12.2841
250.005	226.293	25.7737	155.157	125.26	165.982	58.2485
464.799	215.061	18.5639	83.3625	76.7075	86.8651	19.965
316.031	232.983	30.9746	51.6244	131.081	65.9894	5.3869
217.875	168.776	19.9463	87.4568	186.805	100.115	21.4806
297.916	228.852	39.2317	67.8382	141.806	162.648	33.9191
462.358	190.54	9.9933	49.3005	53.964	70.6196	37.3085
238.183	218.029	27.1162	91.6086	163.796	142.767	16.856
400.582	233.893	23.7492	92.1392	80.4339	141.818	24.3418
272.356	141.282	2.4581	31.4332	67.7828	73.9077	13.0666
152.935	180.587	33.2957	90.2935	133.747	85.2144	22.5734
403.104	251.49	63.4349	61.1855	81.4307	128.22	64.3347
290.621	206.077	31.0436	66.0502	95.7728	164.465	68.6922
280.143	225.584	32.1763	86.736	128.006	178.718	44.0675
196.037	257.254	8.4926	24.4161	211.253	65.4636	3.1847
224.736	228.884	3.0166	32.8054	173.077	134.993	13.9517
317.355	158.899	72.7918	138.926	95.8722	115.846	50.5992
325.134	246.143	38.4378	63.8279	138.94	218.284	45.4906
199.391	236.628	28.436	33.8524	178.741	145.399	32.8368
304.211	221.765	23.2834	170.618	188.558	185.886	59.9262
492.781	251.048	86.1854	23.7354	190.033	83.3721	23.2883
263.945	172.804	18.9573	55.7783	76.1939	82.027	21.5093
155.569	126.419	10.7395	20.2516	172.446	105.861	11.0463
253.523	265.906	16.6191	92.8717	172.057	270.794	42.0367
256.556	181.99	21.9063	93.1016	104.897	135.65	28.6467
200.597	201.128	16.1857	48.2919	317.347	152.836	16.7164
174.56	290.749	9.1685	25.7985	205.947	167.126	28.0837
448.711	265.124	49.9737	120.989	100.999	107.312	43.1352
291.667	259.45	33.5052	135.309	175.258	161.512	75.6014
285.433	219.306	27.6226	61.1045	150.111	133.091	53.8501
270.212	268.06	23.9779	36.889	251.46	93.4522	18.4445
183.881	188.809	17.3196	2.1319	343.383	167.023	8.818
200.657	217.976	24.7835	43.5951	328.456	167.513	17.9158
186.229	170.213	28.5782	56.2142	268.509	174.295	23.8675
215.855	248.356	15.3306	36.1802	253.875	153.919	26.6753
424.519	211.671	14.9934	7.3497	89.3723	89.3723	9.9956
349.468	272.228	20.254	72.4339	140.062	111.912	35.3587
255.302	215.165	14.0685	63.3082	205.234	149.374	34.3436
228.412	260.243	12.4745	58.9311	232.283	178.944	36.5631
360.306	268.519	46.2963	192.029	112.319	134.058	49.9195
280.329	198.44	9.9653	95.7539	140.815	107.452	27.2964
307.595	175.678	10.1475	45.6635	103.377	101.475	19.6607
350.736	149.965	27.3301	58.5144	132.796	80.939	16.8185
281.322	187.935	8.1206	67.2854	78.3063	60.9049	18.5615
405.284	241.709	30.3541	92.7487	80.9444	173.693	79.258
500.525	264.181	68.8025	140.756	59.3487	86.6597	23.1092
364.432	183.09	5.1254	70.6764	94.4606	122.449	22.7405
207.829	130.067	24.4094	27.1991	168.774	135.298	18.1327
270.546	217.109	11.7629	158.631	224.503	245.34	37.9773
282.626	192.652	15.3486	95.2673	100.56	95.2673	16.9364
315.64	237.166	17.4387	80.218	174.387	168.283	42.7248
267.929	186.946	12.087	65.2699	116.841	160.355	13.6986
198.895	214.549	20.5648	31.0006	216.39	130.755	26.3966
290.932	184.076	38.6142	21.9096	122.717	118.543	14.6092
414.365	186.372	33.1492	205.156	95.3959	244.567	45.6722
236.549	218.46	27.8293	84.8794	199.907	222.644	70.9647
310.334	243.926	9.2128	37.1105	150.308	147.716	30.4503
328.559	190.496	15.0888	98.8317	118.07	130.141	19.9927
117.394	134.124	17.0136	55.5776	205.864	115.409	20.6998
401.533	241.21	52.232	116.071	85.2397	119.335	31.5568
177.039	243.8	27.8397	100.818	210.014	286.776	32.4346
204.109	198.047	4.3786	26.9451	282.25	172.112	8.7572
155.286	206.537	19.6409	39.2819	311.186	148.841	14.1169
244.375	138.198	14.831	64.3802	194.826	139.547	20.2242
179.509	131.527	21.1685	44.8772	145.075	158.905	10.4431
213.997	192.463	49.1252	68.9771	211.642	139.3	24.8991
281.44	168.69	9.6878	72.706	157.849	149.61	22.5499
259.955	228.775	11.2697	43.9519	167.167	158.527	10.5184
253.333	219.63	13.3333	68.5185	173.704	122.593	12.2222
232.123	193.619	15.8893	104.389	225.889	104.51	8.8009
337.527	240.632	13.1745	418.303	275.428	544.433	352.784
169.571	227.386	20.7469	51.1757	307.884	183.956	28.2158
302.032	265.942	21.3735	23.1254	87.5964	100.561	9.11
195.498	225.724	35.6913	44.373	299.678	216.72	28.6174
251.723	245.73	7.1921	83.9077	326.041	288.083	151.034
235.623	137.912	4.4668	39.6427	279.732	141.541	14.7962
197.444	225.019	3.3091	42.2831	215.46	110.304	41.9154
256.268	191.837	13.9942	51.312	165.015	100.583	8.4548
268.735	305.967	6.6826	100.716	310.262	242.959	91.6468
336.495	172.95	26.6479	296.785	237.219	334.405	230.949
191.026	161.795	8.5359	44.541	195.897	122.051	10.2564
379.017	348.045	3.5927	151.653	387.534	382.888	99.1096
259.174	231.269	36.6972	122.706	306.957	171.254	77.2171
203.267	221.416	13.7114	62.0599	185.572	266.788	83.0309
268.89	244.941	33.0428	101.251	170.974	180.068	61.8416
282.323	293.214	37.1405	67.0204	225.077	132.644	34.9065
282.289	202.373	25.0544	49.4523	113.604	107.703	29.2617
294.111	168.554	13.4934	32.7044	208.119	129.217	22.1841
230.497	231.785	17.1692	80.2661	160.962	126.623	10.3015
393.18	166.417	14.6177	83.2087	92.5791	69.3406	25.4874
252.758	285.529	29.8507	67.8131	162.557	124.594	10.3829
302.817	189.847	14.9648	39.3192	287.852	123.826	14.9648
249.01	219.66	39.3664	104.589	241.789	254.368	74.0741
244.232	149.165	7.5577	72.3946	252.983	154.336	66.428
249.515	229.164	16.2214	37.1618	237.423	134.49	8.848
237.741	183.025	9.2793	76.4739	159.027	123.51	29.7576
339.974	238.127	14.147	162.387	122.216	322.03	41.7086
278.98	160.614	16.683	50.007	193.785	101.606	23.0447
239.994	215.915	9.5257	17.7283	183.105	141.827	6.8796
318.168	147.786	241.527	22.5954	127.328	112.366	16.7939
259.481	194.936	8.9101	45.8546	291.427	163.86	24.9919
310.453	197.733	27.0781	160.894	133.501	197.418	65.1763
226.511	211.478	13.7588	73.1257	209.95	108.032	25.2245
304.786	248.363	23.7834	97.1234	162.72	120.403	34.7607
250.603	211.998	2.9953	8.653	229.969	98.5107	2.6625
338.182	272.873	7.428	118.311	91.5832	166.651	56.6765
468.715	236.716	5.5748	106.779	62.1809	171.962	64.325
292.49	227.671	18.3814	122.22	186.716	143.181	56.1117
99.6221	159.052	7.9011	33.6654	331.501	97.561	10.9928
292.53	161.123	18.4895	167.396	220.223	321.585	75.9389
234.575	138.432	18.8321	54.5139	238.209	244.487	52.862
178.419	272.436	8.6432	21.2714	364.316	217.415	27.2436
234.729	126.287	54.9073	127.66	140.014	163.349	41.1805
207.049	201.986	25.8812	122.654	279.629	336.455	79.8941
116.004	253.491	15.0376	20.4082	205.156	292.159	43.5016
261.25	181.883	33.542	20.7866	101.098	47.2422	5.1966
193.466	247.575	8.6779	202.144	120.47	149.056	31.1383
158.822	211.655	3.5223	26.8972	185.078	236.311	13.4486
365.767	231.756	9.7302	56.1698	79.6108	98.6289	18.1336
236.09	229.699	76.6917	120.677	186.842	164.662	30.0752
358.418	201.507	9.4973	129.658	135.439	262.207	48.7251
271.768	203.166	30.5315	77.6479	185.45	148.134	27.893
217.715	165.977	5.7947	38.4934	149.007	242.964	24.4205
201.204	268.272	1.1116	24.0852	154.887	118.944	7.4108
502.667	218.387	85.9743	170.693	69.658	119.862	94.1324
387.766	324.002	16.0705	71.0213	93.3126	37.8434	3.1104
185.175	309.826	9.7271	22.6966	188.778	244.258	29.5416
164.034	290.892	14.4052	31.1338	117.565	153.346	32.5279
174.991	210.564	43.8376	20.1222	232.483	104.923	8.6238
287.451	186.438	0.6235	12.4708	106.625	147.779	13.0943
163.971	243.588	36.2538	79.1422	246.668	212.784	31.7517
133.333	156.923	10.7692	67.1795	224.615	145.128	8.7179
654.786	144.038	13.9629	49.9724	51.4422	55.8516	10.2884
520.219	233.036	100.754	22.6182	43.8657	65.1131	15.7642
794.297	172.098	18.6864	249.134	27.4949	330.957	163.951
298.606	198.145	28.7032	33.3328	62.9619	93.9798	12.0368
235.822	255.687	44.8574	60.2371	189.362	182.634	16.3409
387.94	198.995	105.025	89.9497	78.392	177.387	41.206
506.6	271.527	22.6273	15.0849	44.626	67.2533	6.2854
391.549	242.817	5.7859	16.1859	38.8732	75.493	24.7887
344.849	212.404	8.2009	61.917	73.8083	64.3772	9.8411
189.052	251.271	4.5378	26.5719	247.682	323.362	8.3757

## Sheet: B
Patient Identifier	Overall Survival Status	Overall Survival (Months)	z-score-EXOSC1	state（s）	time（s）
TCGA-BP-4766	LIVING	48.03	-1.7918	censored	48.03
TCGA-CZ-5982	LIVING	80.12	-1.6337	censored	80.12
TCGA-B4-5832	LIVING	5.09	-1.6247	censored	5.09
TCGA-BP-4164	DECEASED	32.59	-1.5958	deceased	32.59
TCGA-A3-3328	LIVING	45.5	-1.5866	censored	45.5
TCGA-B0-5099	DECEASED	15.93	-1.563	deceased	15.93
TCGA-B4-5838	LIVING	5.45	-1.5557	censored	5.45
TCGA-A3-3331	LIVING	48.78	-1.5175	censored	48.78
TCGA-B8-4146	LIVING	16.79	-1.5167	censored	16.79
TCGA-B2-3923	LIVING	32.59	-1.4957	censored	32.59
TCGA-CZ-5989	LIVING	62.58	-1.487	censored	62.58
TCGA-BP-4775	LIVING	60.55	-1.4863	censored	60.55
TCGA-CJ-6032	LIVING	119.55	-1.4746	censored	119.55
TCGA-AK-3443	LIVING	46.75	-1.4739	censored	46.75
TCGA-AK-3465	LIVING	12.12	-1.3817	censored	12.12
TCGA-EU-5907	LIVING	4.17	-1.3319	censored	4.17
TCGA-AK-3433	LIVING	111.99	-1.3102	censored	111.99
TCGA-BP-4991	LIVING	46.42	-1.2845	censored	46.42
TCGA-B0-5402	LIVING	42.38	-1.2338	censored	42.38
TCGA-CJ-4639	LIVING	106.08	-1.2208	censored	106.08
TCGA-AK-3461	LIVING	72.83	-1.2026	censored	72.83
TCGA-A3-3320	LIVING	49.54	-1.2012	censored	49.54
TCGA-B0-5110	LIVING	66	-1.2007	censored	66
TCGA-AK-3440	LIVING	94.12	-1.1966	censored	94.12
TCGA-BP-4807	LIVING	6.93	-1.1813	censored	6.93
TCGA-BP-4994	LIVING	42.97	-1.1586	censored	42.97
TCGA-CJ-4878	LIVING	71.81	-1.1564	censored	71.81
TCGA-B0-5703	LIVING	73.78	-1.1426	censored	73.78
TCGA-CW-5583	LIVING	81.77	-1.1353	censored	81.77
TCGA-CJ-4635	LIVING	46.52	-1.134	censored	46.52
TCGA-CJ-4893	LIVING	24.64	-1.1328	censored	24.64
TCGA-A3-3322	LIVING	48.55	-1.1255	censored	48.55
TCGA-A3-3316	LIVING	49.05	-1.1187	censored	49.05
TCGA-A3-3326	LIVING	37.35	-1.1085	censored	37.35
TCGA-DV-5567	LIVING	65.83	-1.1037	censored	65.83
TCGA-AK-3428	LIVING	122.47	-1.1024	censored	122.47
TCGA-EU-5906	LIVING	6.77	-1.0576	censored	6.77
TCGA-DV-A4W0	LIVING	81.14	-1.057	censored	81.14
TCGA-AK-3444	LIVING	48.32	-1.0433	censored	48.32
TCGA-B8-5549	LIVING	6.37	-1.0351	censored	6.37
TCGA-A3-3359	LIVING	82.26	-1.0328	censored	82.26
TCGA-BP-4987	LIVING	36.93	-1.0305	censored	36.93
TCGA-A3-3385	LIVING	65.47	-1.0208	censored	65.47
TCGA-B0-5117	LIVING	52.83	-1.0176	censored	52.83
TCGA-CW-6088	LIVING	105.85	-1.0074	censored	105.85
TCGA-A3-3370	LIVING	74.7	-1.0066	censored	74.7
TCGA-B4-5836	LIVING	4.63	-1.006	censored	4.63
TCGA-B0-5699	LIVING	126.18	-1.0012	censored	126.18
TCGA-B0-4836	DECEASED	40.67	-0.998	deceased	40.67
TCGA-BP-4789	LIVING	48.92	-0.998	censored	48.92
TCGA-BP-4330	LIVING	62.02	-0.9941	censored	62.02
TCGA-BP-4995	LIVING	45.04	-0.9922	censored	45.04
TCGA-BP-5200	LIVING	34.92	-0.9843	censored	34.92
TCGA-BP-4342	DECEASED	74.11	-0.9745	deceased	74.11
TCGA-CJ-4899	LIVING	50.2	-0.9628	censored	50.2
TCGA-B8-5158	LIVING	40.01	-0.9608	censored	40.01
TCGA-EU-5904	LIVING	18.1	-0.9589	censored	18.1
TCGA-A3-3372	LIVING	24.15	-0.9559	censored	24.15
TCGA-CW-5580	DECEASED	64.52	-0.9406	deceased	64.52
TCGA-BP-4967	LIVING	6.73	-0.9361	censored	6.73
TCGA-BP-4973	LIVING	45.47	-0.9341	censored	45.47
TCGA-BP-4982	LIVING	33.31	-0.9332	censored	33.31
TCGA-BP-4790	DECEASED	36.5	-0.933	deceased	36.5
TCGA-CZ-5986	LIVING	12.25	-0.9282	censored	12.25
TCGA-BP-4999	LIVING	41.59	-0.9246	censored	41.59
TCGA-B4-5844	LIVING	0.23	-0.9187	censored	0.23
TCGA-CW-5585	LIVING	85.71	-0.9185	censored	85.71
TCGA-B8-A54F	LIVING	17.05	-0.9161	censored	17.05
TCGA-B2-A4SR	LIVING	16.66	-0.913	censored	16.66
TCGA-B8-5159	LIVING	23.72	-0.8973	censored	23.72
TCGA-A3-3373	LIVING	53.25	-0.8972	censored	53.25
TCGA-B0-5691	LIVING	112.71	-0.8955	censored	112.71
TCGA-CJ-4634	LIVING	114.91	-0.8925	censored	114.91
TCGA-B0-5698	LIVING	119.28	-0.8897	censored	119.28
TCGA-AS-3778	LIVING	1.41	-0.8811	censored	1.41
TCGA-CJ-4904	LIVING	108.48	-0.8793	censored	108.48
TCGA-B8-5553	LIVING	14.29	-0.8791	censored	14.29
TCGA-A3-3351	LIVING	29.89	-0.8787	censored	29.89
TCGA-A3-3323	LIVING	36.33	-0.8774	censored	36.33
TCGA-CJ-4643	LIVING	58.9	-0.874	censored	58.9
TCGA-CJ-4907	LIVING	49.24	-0.8583	censored	49.24
TCGA-BP-4162	LIVING	100.99	-0.8567	censored	100.99
TCGA-B0-4846	DECEASED	39.42	-0.8561	deceased	39.42
TCGA-A3-3349	LIVING	45.5	-0.8487	censored	45.5
TCGA-A3-3308	LIVING	0.53	-0.8457	censored	0.53
TCGA-BP-4803	LIVING	6.7	-0.8364	censored	6.7
TCGA-T7-A92I	LIVING	11.7	-0.833	censored	11.7
TCGA-B2-4102	LIVING	31.27	-0.8288	censored	31.27
TCGA-BP-4325	LIVING	97.37	-0.8269	censored	97.37
TCGA-BP-4170	DECEASED	76.97	-0.8232	deceased	76.97
TCGA-BP-5186	LIVING	22.77	-0.8173	censored	22.77
TCGA-B8-4148	LIVING	49.93	-0.816	censored	49.93
TCGA-CZ-4859	LIVING	58.71	-0.8153	censored	58.71
TCGA-A3-3362	LIVING	51.22	-0.8092	censored	51.22
TCGA-B0-5104	DECEASED	90.41	-0.8034	deceased	90.41
TCGA-BP-4327	DECEASED	3.58	-0.796	deceased	3.58
TCGA-DV-5566	LIVING	45.93	-0.7935	censored	45.93
TCGA-BP-4976	LIVING	53.61	-0.7922	censored	53.61
TCGA-AK-3456	LIVING	37.55	-0.7908	censored	37.55
TCGA-B8-5165	LIVING	24.21	-0.7873	censored	24.21
TCGA-BP-5004	LIVING	36.99	-0.7861	censored	36.99
TCGA-BP-4161	LIVING	90.21	-0.7854	censored	90.21
TCGA-BP-4963	LIVING	60.25	-0.7826	censored	60.25
TCGA-CW-6093	LIVING	103.35	-0.7753	censored	103.35
TCGA-CJ-4885	LIVING	113.37	-0.7705	censored	113.37
TCGA-CZ-4854	DECEASED	46.12	-0.7579	deceased	46.12
TCGA-B4-5377	LIVING	11.99	-0.7563	censored	11.99
TCGA-CJ-5686	LIVING	66.95	-0.7449	censored	66.95
TCGA-A3-3307	LIVING	47.17	-0.7432	censored	47.17
TCGA-B0-5119	LIVING	50.99	-0.7423	censored	50.99
TCGA-CJ-4889	LIVING	63.93	-0.7405	censored	63.93
TCGA-BP-4965	LIVING	61.47	-0.7321	censored	61.47
TCGA-B8-5552	LIVING	34.36	-0.732	censored	34.36
TCGA-CJ-4897	LIVING	109.76	-0.7297	censored	109.76
TCGA-BP-4756	LIVING	12.29	-0.7293	censored	12.29
TCGA-CJ-4905	LIVING	49.15	-0.7291	censored	49.15
TCGA-B8-5550	LIVING	48.49	-0.7267	censored	48.49
TCGA-DV-5576	DECEASED	23.88	-0.7242	deceased	23.88
TCGA-BP-4329	DECEASED	27.76	-0.723	deceased	27.76
TCGA-BP-4961	LIVING	63.57	-0.7227	censored	63.57
TCGA-B0-5120	LIVING	38.4	-0.7196	censored	38.4
TCGA-BP-4972	LIVING	49.34	-0.7189	censored	49.34
TCGA-A3-3357	LIVING	88.3	-0.7183	censored	88.3
TCGA-A3-3311	DECEASED	39.13	-0.7132	deceased	39.13
TCGA-BP-4970	LIVING	14.22	-0.7084	censored	14.22
TCGA-AK-3454	LIVING	28.71	-0.7072	censored	28.71
TCGA-CZ-4862	LIVING	107.46	-0.7058	censored	107.46
TCGA-B8-A54K	LIVING	15.41	-0.7051	censored	15.41
TCGA-B8-4620	LIVING	25.53	-0.702	censored	25.53
TCGA-CW-5581	LIVING	91.95	-0.6982	censored	91.95
TCGA-A3-A8CQ	LIVING	0.1	-0.6955	censored	0.1
TCGA-A3-3317	LIVING	48.98	-0.6934	censored	48.98
TCGA-BP-4166	LIVING	0.43	-0.6865	censored	0.43
TCGA-B0-5711	LIVING	131.04	-0.685	censored	131.04
TCGA-B2-5636	LIVING	30.19	-0.6847	censored	30.19
TCGA-A3-3378	LIVING	20.7	-0.6729	censored	20.7
TCGA-CZ-5988	LIVING	22.77	-0.6719	censored	22.77
TCGA-B8-A54D	LIVING	27.27	-0.6702	censored	27.27
TCGA-A3-3325	DECEASED	38.44	-0.6671	deceased	38.44
TCGA-CJ-5680	DECEASED	25.23	-0.6649	deceased	25.23
TCGA-BP-4332	LIVING	37.22	-0.6633	censored	37.22
TCGA-A3-3376	DECEASED	55.72	-0.6584	deceased	55.72
TCGA-B0-4693	DECEASED	2.53	-0.6501	deceased	2.53
TCGA-BP-4769	LIVING	61.63	-0.6453	censored	61.63
TCGA-BP-4760	LIVING	77.56	-0.6438	censored	77.56
TCGA-BP-5198	LIVING	19.81	-0.6434	censored	19.81
TCGA-B4-5378	LIVING	5.75	-0.6416	censored	5.75
TCGA-BP-5180	LIVING	74.34	-0.6342	censored	74.34
TCGA-BP-5194	LIVING	13.4	-0.6342	censored	13.4
TCGA-B0-5713	LIVING	91.39	-0.6309	censored	91.39
TCGA-B8-A8YJ	LIVING	14.16	-0.6301	censored	14.16
TCGA-B4-5834	LIVING	1.25	-0.6299	censored	1.25
TCGA-B8-4622	LIVING	50.1	-0.6243	censored	50.1
TCGA-B0-5693	LIVING	133.84	-0.622	censored	133.84
TCGA-B2-5633	LIVING	31.64	-0.622	censored	31.64
TCGA-BP-4797	LIVING	36.37	-0.6201	censored	36.37
TCGA-BP-4169	DECEASED	23.03	-0.6146	deceased	23.03
TCGA-BP-4765	LIVING	71.75	-0.6107	censored	71.75
TCGA-CW-5587	LIVING	73.13	-0.6097	censored	73.13
TCGA-B0-4718	LIVING	58.41	-0.6089	censored	58.41
TCGA-B0-5706	LIVING	105.29	-0.6039	censored	105.29
TCGA-CJ-4641	DECEASED	54.57	-0.603	deceased	54.57
TCGA-CJ-4908	LIVING	50.3	-0.5931	censored	50.3
TCGA-B0-5083	DECEASED	34.33	-0.5924	deceased	34.33
TCGA-A3-3343	LIVING	31.04	-0.5923	censored	31.04
TCGA-B0-5812	LIVING	125.95	-0.5889	censored	125.95
TCGA-BP-4998	LIVING	30.62	-0.5822	censored	30.62
TCGA-B8-5546	LIVING	16.59	-0.5803	censored	16.59
TCGA-DV-5575	LIVING	56.8	-0.5764	censored	56.8
TCGA-A3-A6NN	LIVING	0.1	-0.5753	censored	0.1
TCGA-CJ-4871	LIVING	79.6	-0.575	censored	79.6
TCGA-BP-5008	LIVING	35.18	-0.5735	censored	35.18
TCGA-B0-5113	LIVING	38.6	-0.5625	censored	38.6
TCGA-BP-5184	LIVING	37.22	-0.5543	censored	37.22
TCGA-AK-3445	LIVING	78.58	-0.5525	censored	78.58
TCGA-BP-4774	LIVING	61.93	-0.5392	censored	61.93
TCGA-BP-4975	LIVING	47.08	-0.5371	censored	47.08
TCGA-B2-5635	LIVING	24.8	-0.5321	censored	24.8
TCGA-BP-5181	LIVING	49.11	-0.5291	censored	49.11
TCGA-CJ-4644	DECEASED	11.04	-0.5288	deceased	11.04
TCGA-B0-5097	LIVING	21.85	-0.5281	censored	21.85
TCGA-BP-4974	DECEASED	6.93	-0.5239	deceased	6.93
TCGA-B0-5705	LIVING	149.05	-0.5238	censored	149.05
TCGA-B2-4101	LIVING	21.29	-0.5237	censored	21.29
TCGA-B8-5164	LIVING	0.85	-0.5136	censored	0.85
TCGA-CJ-4886	LIVING	64.13	-0.5135	censored	64.13
TCGA-A3-3352	DECEASED	18.43	-0.5125	deceased	18.43
TCGA-B0-4827	DECEASED	29.07	-0.5102	deceased	29.07
TCGA-BP-5192	LIVING	23.46	-0.509	censored	23.46
TCGA-B0-5690	LIVING	111.43	-0.5048	censored	111.43
TCGA-CZ-5465	DECEASED	84.23	-0.4976	deceased	84.23
TCGA-BP-5189	DECEASED	27	-0.4919	deceased	27
TCGA-A3-3313	DECEASED	24.15	-0.4839	deceased	24.15
TCGA-CJ-4920	DECEASED	4.57	-0.4806	deceased	4.57
TCGA-BP-4977	LIVING	14.91	-0.4805	censored	14.91
TCGA-BP-4344	LIVING	54.73	-0.4771	censored	54.73
TCGA-B0-4945	DECEASED	70.47	-0.4735	deceased	70.47
TCGA-B8-A54H	LIVING	8.41	-0.4717	censored	8.41
TCGA-BP-5202	LIVING	0.95	-0.4676	censored	0.95
TCGA-CZ-5451	LIVING	63.37	-0.462	censored	63.37
TCGA-BP-4782	LIVING	11.63	-0.4613	censored	11.63
TCGA-B0-4710	LIVING	57.65	-0.4605	censored	57.65
TCGA-BP-4355	DECEASED	31.31	-0.4595	deceased	31.31
TCGA-A3-3324	LIVING	38.96	-0.4571	censored	38.96
TCGA-B8-4151	LIVING	42.67	-0.4532	censored	42.67
TCGA-B8-A7U6	LIVING	16.26	-0.4491	censored	16.26
TCGA-CW-5591	LIVING	74.61	-0.4474	censored	74.61
TCGA-B0-4824	DECEASED	54.43	-0.4407	deceased	54.43
TCGA-A3-3374	LIVING	43.17	-0.4396	censored	43.17
TCGA-A3-A8OW	LIVING	10.61	-0.4365	censored	10.61
TCGA-BP-4346	DECEASED	49.05	-0.4354	deceased	49.05
TCGA-BP-4801	LIVING	36.93	-0.4336	censored	36.93
TCGA-BP-4768	LIVING	13.14	-0.4324	censored	13.14
TCGA-B0-5695	LIVING	70.63	-0.4271	censored	70.63
TCGA-CZ-5985	LIVING	65.6	-0.4255	censored	65.6
TCGA-CZ-5987	DECEASED	14.62	-0.4241	deceased	14.62
TCGA-CZ-4853	LIVING	25.43	-0.4161	censored	25.43
TCGA-GK-A6C7	LIVING	2	-0.4143	censored	2
TCGA-AK-3460	LIVING	82.39	-0.4138	censored	82.39
TCGA-B0-5709	LIVING	130.55	-0.4124	censored	130.55
TCGA-DV-5569	LIVING	11.66	-0.4119	censored	11.66
TCGA-A3-3382	LIVING	18.86	-0.4096	censored	18.86
TCGA-CJ-6028	DECEASED	53.38	-0.4078	deceased	53.38
TCGA-A3-A6NL	LIVING	22.63	-0.4038	censored	22.63
TCGA-BP-4349	LIVING	12.22	-0.3979	censored	12.22
TCGA-A3-3367	LIVING	74.57	-0.3977	censored	74.57
TCGA-CZ-5458	LIVING	91.62	-0.3971	censored	91.62
TCGA-BP-4326	DECEASED	53.38	-0.3943	deceased	53.38
TCGA-A3-3380	LIVING	18.63	-0.3937	censored	18.63
TCGA-CJ-4874	LIVING	75	-0.3932	censored	75
TCGA-BP-5007	LIVING	37.45	-0.3914	censored	37.45
TCGA-B0-4838	DECEASED	27.4	-0.3866	deceased	27.4
TCGA-BP-4347	LIVING	44.91	-0.3827	censored	44.91
TCGA-BP-4160	LIVING	94.65	-0.3822	censored	94.65
TCGA-CZ-5461	DECEASED	10.84	-0.3769	deceased	10.84
TCGA-BP-4340	DECEASED	18.46	-0.3755	deceased	18.46
TCGA-BP-4964	LIVING	61.17	-0.3736	censored	61.17
TCGA-B0-5095	DECEASED	8.05	-0.3718	deceased	8.05
TCGA-6D-AA2E	LIVING	11.89	-0.3707	censored	11.89
TCGA-A3-A6NJ	LIVING	15.37	-0.3509	censored	15.37
TCGA-B4-5843	LIVING	0.36	-0.3481	censored	0.36
TCGA-CZ-5456	LIVING	79.57	-0.339	censored	79.57
TCGA-BP-4163	LIVING	93.27	-0.3381	censored	93.27
TCGA-CW-5584	DECEASED	5.39	-0.3377	deceased	5.39
TCGA-B0-4703	DECEASED	5.98	-0.3343	deceased	5.98
TCGA-BP-5195	LIVING	24.61	-0.3279	censored	24.61
TCGA-B8-5545	LIVING	50.1	-0.3235	censored	50.1
TCGA-B0-4845	DECEASED	65.24	-0.3226	deceased	65.24
TCGA-B0-5116	LIVING	41.85	-0.3193	censored	41.85
TCGA-B0-5710	LIVING	79.83	-0.3188	censored	79.83
TCGA-BP-4334	DECEASED	21.19	-0.318	deceased	21.19
TCGA-B0-5115	LIVING	52.69	-0.3172	censored	52.69
TCGA-B0-5077	DECEASED	43.27	-0.3015	deceased	43.27
TCGA-CZ-5455	DECEASED	18.43	-0.2962	deceased	18.43
TCGA-A3-3347	DECEASED	52.89	-0.2922	deceased	52.89
TCGA-CZ-5457	LIVING	90.47	-0.2917	censored	90.47
TCGA-CJ-4868	DECEASED	21.22	-0.2873	deceased	21.22
TCGA-B0-5096	DECEASED	2.23	-0.2822	deceased	2.23
TCGA-CZ-5467	DECEASED	2.4	-0.282	deceased	2.4
TCGA-CW-6097	DECEASED	18.76	-0.2719	deceased	18.76
TCGA-B0-4694	DECEASED	3.48	-0.2699	deceased	3.48
TCGA-CZ-5453	DECEASED	79.47	-0.2627	deceased	79.47
TCGA-B0-4837	DECEASED	45.27	-0.261	deceased	45.27
TCGA-CW-5590	DECEASED	35.32	-0.2575	deceased	35.32
TCGA-CJ-4894	DECEASED	27.63	-0.2558	deceased	27.63
TCGA-BP-4771	DECEASED	5.32	-0.2538	deceased	5.32
TCGA-CJ-4918	DECEASED	3.06	-0.2399	deceased	3.06
TCGA-BP-4795	LIVING	20.37	-0.2386	censored	20.37
TCGA-BP-4959	LIVING	87.39	-0.2342	censored	87.39
TCGA-AK-3450	LIVING	58.44	-0.233	censored	58.44
TCGA-CZ-4856	LIVING	0.59	-0.2312	censored	0.59
TCGA-CJ-4895	DECEASED	39.42	-0.2287	deceased	39.42
TCGA-B8-5551	LIVING	0.53	-0.2167	censored	0.53
TCGA-B2-5639	DECEASED	32.95	-0.2137	deceased	32.95
TCGA-B0-4688	DECEASED	3.32	-0.2076	deceased	3.32
TCGA-CZ-4861	DECEASED	14.65	-0.2052	deceased	14.65
TCGA-A3-A8OX	LIVING	0	-0.2036	censored	0
TCGA-CZ-5463	LIVING	21.75	-0.2025	censored	21.75
TCGA-BP-5006	LIVING	27.6	-0.1984	censored	27.6
TCGA-CW-5589	LIVING	78.12	-0.1982	censored	78.12
TCGA-BP-4969	LIVING	58.94	-0.1922	censored	58.94
TCGA-BP-4174	LIVING	61.73	-0.1894	censored	61.73
TCGA-BP-5187	LIVING	13.34	-0.1881	censored	13.34
TCGA-DV-5565	LIVING	43.66	-0.1866	censored	43.66
TCGA-B0-4834	DECEASED	68.66	-0.1846	deceased	68.66
TCGA-B0-5075	DECEASED	20.93	-0.1768	deceased	20.93
TCGA-BP-4331	DECEASED	80.62	-0.1742	deceased	80.62
TCGA-B8-A54J	LIVING	17.35	-0.1688	censored	17.35
TCGA-B0-4701	DECEASED	7.82	-0.1665	deceased	7.82
TCGA-B2-5641	LIVING	21.55	-0.1649	censored	21.55
TCGA-CJ-4892	LIVING	49.97	-0.1625	censored	49.97
TCGA-B0-5106	DECEASED	52.5	-0.1576	deceased	52.5
TCGA-A3-3365	LIVING	28.68	-0.1561	censored	28.68
TCGA-A3-A8OU	LIVING	0	-0.1464	censored	0
TCGA-BP-4158	LIVING	110.94	-0.1433	censored	110.94
TCGA-B0-4823	DECEASED	14.91	-0.1274	deceased	14.91
TCGA-CJ-5684	LIVING	73.29	-0.1268	censored	73.29
TCGA-BP-4338	LIVING	93.92	-0.1267	censored	93.92
TCGA-CZ-4857	DECEASED	47.04	-0.1196	deceased	47.04
TCGA-CZ-4863	LIVING	63.34	-0.1182	censored	63.34
TCGA-B2-3924	LIVING	35.87	-0.1162	censored	35.87
TCGA-BP-4781	LIVING	68.33	-0.1155	censored	68.33
TCGA-B0-4848	DECEASED	29.01	-0.1147	deceased	29.01
TCGA-B0-4816	DECEASED	45.04	-0.1064	deceased	45.04
TCGA-CJ-4903	LIVING	51.25	-0.1064	censored	51.25
TCGA-A3-3329	LIVING	53.35	-0.1043	censored	53.35
TCGA-BP-4762	DECEASED	44.12	-0.1037	deceased	44.12
TCGA-CJ-5681	DECEASED	18.13	-0.1034	deceased	18.13
TCGA-B8-4619	LIVING	17.18	-0.101	censored	17.18
TCGA-BP-5182	LIVING	38.27	-0.1001	censored	38.27
TCGA-AK-3431	DECEASED	73.62	-0.0976	deceased	73.62
TCGA-BP-5168	DECEASED	48.06	-0.0961	deceased	48.06
TCGA-DV-5574	LIVING	66.23	-0.0925	censored	66.23
TCGA-B0-5712	LIVING	89.42	-0.0912	censored	89.42
TCGA-A3-3387	LIVING	20.27	-0.0892	censored	20.27
TCGA-BP-4986	LIVING	25.79	-0.0883	censored	25.79
TCGA-CJ-4876	LIVING	64.22	-0.0872	censored	64.22
TCGA-B0-4844	DECEASED	10.28	-0.0747	deceased	10.28
TCGA-B0-5702	LIVING	71.35	-0.0722	censored	71.35
TCGA-B0-4828	DECEASED	10.09	-0.068	deceased	10.09
TCGA-B8-4154	LIVING	45.34	-0.055	censored	45.34
TCGA-BP-4354	DECEASED	33.97	-0.0463	deceased	33.97
TCGA-B0-4852	DECEASED	36.83	-0.0417	deceased	36.83
TCGA-B0-5108	LIVING	58.54	-0.0396	censored	58.54
TCGA-B8-A54E	LIVING	29.86	-0.0365	censored	29.86
TCGA-CZ-5460	LIVING	94.38	-0.0279	censored	94.38
TCGA-AK-3434	LIVING	68.56	-0.0208	censored	68.56
TCGA-CJ-4884	LIVING	57.79	-0.0175	censored	57.79
TCGA-CJ-5671	LIVING	130.98	-0.0158	censored	130.98
TCGA-B8-5163	LIVING	27	-0.008	censored	27
TCGA-CJ-5676	LIVING	133.61	-0.0069	censored	133.61
TCGA-CW-5588	LIVING	66.26	-0.0059	censored	66.26
TCGA-B0-4849	DECEASED	2.27	0.0001	deceased	2.27
TCGA-CZ-4865	DECEASED	5.45	0.0017	deceased	5.45
TCGA-CZ-4864	DECEASED	92.97	0.002	deceased	92.97
TCGA-CJ-4637	DECEASED	73.16	0.0039	deceased	73.16
TCGA-CJ-5682	LIVING	122.73	0.0047	censored	122.73
TCGA-BP-4784	LIVING	60.91	0.0085	censored	60.91
TCGA-B0-5694	DECEASED	15.77	0.0101	deceased	15.77
TCGA-CJ-4902	LIVING	49.93	0.0299	censored	49.93
TCGA-EU-5905	LIVING	3.91	0.0479	censored	3.91
TCGA-BP-4353	DECEASED	12.32	0.0563	deceased	12.32
TCGA-B0-4813	DECEASED	0.59	0.069	deceased	0.59
TCGA-BP-5176	DECEASED	52.23	0.0715	deceased	52.23
TCGA-A3-3319	LIVING	37.12	0.0726	censored	37.12
TCGA-CJ-4882	LIVING	61.86	0.0763	censored	61.86
TCGA-CJ-5689	DECEASED	53.22	0.0791	deceased	53.22
TCGA-CJ-4901	LIVING	47.63	0.0857	censored	47.63
TCGA-BP-4173	LIVING	62.19	0.0898	censored	62.19
TCGA-CZ-5470	LIVING	12.68	0.0931	censored	12.68
TCGA-BP-4777	LIVING	56.87	0.0933	censored	56.87
TCGA-CZ-5984	LIVING	67.9	0.0934	censored	67.9
TCGA-BP-4345	LIVING	49.8	0.1	censored	49.8
TCGA-CZ-4866	LIVING	107.33	0.1076	censored	107.33
TCGA-A3-A6NI	LIVING	33.44	0.1173	censored	33.44
TCGA-BP-4341	DECEASED	52.2	0.1206	deceased	52.2
TCGA-B0-5701	LIVING	80.85	0.1238	censored	80.85
TCGA-BP-4804	LIVING	47.93	0.1292	censored	47.93
TCGA-CJ-4872	LIVING	47.14	0.1416	censored	47.14
TCGA-G6-A8L8	DECEASED	35.84	0.1478	deceased	35.84
TCGA-BP-4988	DECEASED	27.2	0.152	deceased	27.2
TCGA-A3-A8OV	LIVING	11.17	0.1536	censored	11.17
TCGA-B8-4621	LIVING	25.89	0.1605	censored	25.89
TCGA-CW-6090	LIVING	83.84	0.1785	censored	83.84
TCGA-BP-4993	LIVING	5.81	0.1813	censored	5.81
TCGA-BP-4787	DECEASED	15.77	0.1826	deceased	15.77
TCGA-B0-4699	DECEASED	3.61	0.1834	deceased	3.61
TCGA-CZ-5454	DECEASED	23.72	0.1855	deceased	23.72
TCGA-CJ-4890	LIVING	115.6	0.198	censored	115.6
TCGA-CZ-5466	LIVING	22.5	0.2031	censored	22.5
TCGA-B8-5162	LIVING	1.18	0.2147	censored	1.18
TCGA-BP-4351	LIVING	31.87	0.2164	censored	31.87
TCGA-B0-5102	DECEASED	90.8	0.2251	deceased	90.8
TCGA-CJ-5672	DECEASED	71.94	0.2283	deceased	71.94
TCGA-BP-5173	DECEASED	2.04	0.2347	deceased	2.04
TCGA-A3-3306	LIVING	36.79	0.2363	censored	36.79
TCGA-BP-4763	DECEASED	41.72	0.241	deceased	41.72
TCGA-B0-4713	DECEASED	6.64	0.2423	deceased	6.64
TCGA-BP-5174	LIVING	74.15	0.2432	censored	74.15
TCGA-B0-5080	DECEASED	11.24	0.2469	deceased	11.24
TCGA-CJ-6030	DECEASED	75.53	0.2528	deceased	75.53
TCGA-CZ-5464	LIVING	69.91	0.2539	censored	69.91
TCGA-B0-5399	LIVING	46.35	0.2797	censored	46.35
TCGA-B0-5088	DECEASED	18.5	0.2822	deceased	18.5
TCGA-BP-4337	DECEASED	0.07	0.2872	deceased	0.07
TCGA-BP-4177	LIVING	54.86	0.2965	censored	54.86
TCGA-CJ-5683	LIVING	62.06	0.3003	censored	62.06
TCGA-CJ-4870	LIVING	49.21	0.3038	censored	49.21
TCGA-B0-5697	LIVING	86.4	0.3053	censored	86.4
TCGA-B0-4706	DECEASED	2.14	0.3151	deceased	2.14
TCGA-CJ-4887	DECEASED	30.62	0.3157	deceased	30.62
TCGA-CZ-5462	DECEASED	10.22	0.3229	deceased	10.22
TCGA-A3-3358	LIVING	42.94	0.3334	censored	42.94
TCGA-B0-4690	DECEASED	1.41	0.3344	deceased	1.41
TCGA-B0-4707	DECEASED	19.71	0.3344	deceased	19.71
TCGA-CJ-4638	DECEASED	14.16	0.3443	deceased	14.16
TCGA-BP-5009	DECEASED	35.87	0.3545	deceased	35.87
TCGA-B8-4153	LIVING	25.03	0.3682	censored	25.03
TCGA-BP-4759	LIVING	77.92	0.3698	censored	77.92
TCGA-A3-3335	LIVING	61.96	0.3712	censored	61.96
TCGA-BP-4983	LIVING	46.42	0.374	censored	46.42
TCGA-BP-5183	LIVING	42.41	0.3835	censored	42.41
TCGA-CJ-4888	DECEASED	51.48	0.3853	deceased	51.48
TCGA-B0-4814	DECEASED	5.52	0.3938	deceased	5.52
TCGA-B0-4818	DECEASED	16.75	0.4024	deceased	16.75
TCGA-AK-3429	LIVING	109.33	0.4124	censored	109.33
TCGA-B0-5696	LIVING	85.71	0.4151	censored	85.71
TCGA-CJ-6031	LIVING	62.61	0.416	censored	62.61
TCGA-B0-5700	LIVING	58.8	0.4192	censored	58.8
TCGA-B0-4833	DECEASED	78.38	0.4301	deceased	78.38
TCGA-BP-4335	DECEASED	15.6	0.4472	deceased	15.6
TCGA-BP-4971	LIVING	48.85	0.46	censored	48.85
TCGA-A3-3383	LIVING	28.29	0.4683	censored	28.29
TCGA-BP-5001	LIVING	38.67	0.472	censored	38.67
TCGA-B0-4714	DECEASED	3.25	0.4756	deceased	3.25
TCGA-BP-4798	DECEASED	10.97	0.4757	deceased	10.97
TCGA-BP-4176	LIVING	64.22	0.4763	censored	64.22
TCGA-CZ-4858	DECEASED	69.15	0.487	deceased	69.15
TCGA-CW-6087	DECEASED	1.35	0.4963	deceased	1.35
TCGA-CZ-5468	DECEASED	1.94	0.5021	deceased	1.94
TCGA-CZ-5459	LIVING	55.29	0.5182	censored	55.29
TCGA-CJ-4636	LIVING	63.21	0.5358	censored	63.21
TCGA-MW-A4EC	LIVING	16.36	0.5618	censored	16.36
TCGA-B0-5085	DECEASED	25.3	0.59	deceased	25.3
TCGA-B0-4843	DECEASED	10.51	0.5963	deceased	10.51
TCGA-CJ-4916	LIVING	45.11	0.6032	censored	45.11
TCGA-CJ-5675	LIVING	129.3	0.6145	censored	129.3
TCGA-BP-4960	LIVING	71.35	0.615	censored	71.35
TCGA-B0-4817	DECEASED	33.48	0.6269	deceased	33.48
TCGA-BP-5199	LIVING	44.51	0.6496	censored	44.51
TCGA-BP-5196	LIVING	33.44	0.651	censored	33.44
TCGA-BP-5010	DECEASED	28.84	0.6746	deceased	28.84
TCGA-CJ-4642	LIVING	105.29	0.6765	censored	105.29
TCGA-A3-3346	DECEASED	4.5	0.6786	deceased	4.5
TCGA-DV-5573	LIVING	37.12	0.6833	censored	37.12
TCGA-B0-5707	LIVING	123	0.6952	censored	123
TCGA-BP-4167	LIVING	89.29	0.6979	censored	89.29
TCGA-CJ-4923	DECEASED	18.79	0.7002	deceased	18.79
TCGA-BP-4165	LIVING	99.77	0.7022	censored	99.77
TCGA-B0-5094	DECEASED	10.94	0.7087	deceased	10.94
TCGA-BP-5177	LIVING	9.63	0.7143	censored	9.63
TCGA-AK-3425	LIVING	109.82	0.7194	censored	109.82
TCGA-BP-5201	LIVING	31.24	0.7253	censored	31.24
TCGA-B8-A54G	LIVING	1.74	0.7281	censored	1.74
TCGA-B0-5692	LIVING	129.57	0.729	censored	129.57
TCGA-CJ-5679	DECEASED	22.31	0.7371	deceased	22.31
TCGA-BP-4962	LIVING	58.64	0.7373	censored	58.64
TCGA-B0-4819	DECEASED	6.01	0.7418	deceased	6.01
TCGA-B2-4098	DECEASED	1.68	0.7479	deceased	1.68
TCGA-B8-4143	DECEASED	23.29	0.749	deceased	23.29
TCGA-DV-5568	LIVING	12.16	0.7491	censored	12.16
TCGA-CJ-4640	LIVING	114.32	0.7749	censored	114.32
TCGA-B0-5081	DECEASED	11.89	0.7752	deceased	11.89
TCGA-AK-3455	DECEASED	22.44	0.7788	deceased	22.44
TCGA-BP-4985	DECEASED	31.27	0.847	deceased	31.27
TCGA-B0-4810	DECEASED	15.7	0.8479	deceased	15.7
TCGA-BP-4992	LIVING	16.46	0.8673	censored	16.46
TCGA-CZ-4860	DECEASED	6.77	0.8677	deceased	6.77
TCGA-BP-4989	LIVING	3.88	0.8697	censored	3.88
TCGA-B0-5121	LIVING	48.78	0.8969	censored	48.78
TCGA-AS-3777	LIVING	40.67	0.9155	censored	40.67
TCGA-DV-A4VZ	LIVING	11.99	0.946	censored	11.99
TCGA-MM-A563	LIVING	19.42	0.9476	censored	19.42
TCGA-B0-5092	DECEASED	15.08	0.9655	deceased	15.08
TCGA-MM-A84U	LIVING	23	0.9799	censored	23
TCGA-BP-5170	LIVING	79.24	0.9837	censored	79.24
TCGA-CZ-5452	LIVING	58.77	0.9945	censored	58.77
TCGA-BP-4968	LIVING	57.36	1.0108	censored	57.36
TCGA-CJ-4875	DECEASED	116.75	1.0608	deceased	116.75
TCGA-CJ-6033	DECEASED	7.36	1.0693	deceased	7.36
TCGA-CJ-4881	LIVING	66.16	1.0834	censored	66.16
TCGA-B0-4811	DECEASED	46.55	1.0909	deceased	46.55
TCGA-CJ-5677	DECEASED	25.69	1.1029	deceased	25.69
TCGA-BP-5190	LIVING	33.21	1.1216	censored	33.21
TCGA-B0-4842	DECEASED	56.64	1.1322	deceased	56.64
TCGA-BP-4343	DECEASED	62.81	1.1354	deceased	62.81
TCGA-B2-4099	LIVING	31.93	1.1413	censored	31.93
TCGA-B0-4700	DECEASED	65.05	1.1538	deceased	65.05
TCGA-CJ-6027	DECEASED	118.76	1.1842	deceased	118.76
TCGA-B0-5107	DECEASED	30.45	1.1987	deceased	30.45
TCGA-BP-4799	DECEASED	37.22	1.2097	deceased	37.22
TCGA-B0-4815	DECEASED	52.17	1.2132	deceased	52.17
TCGA-CJ-4912	LIVING	54.43	1.2751	censored	54.43
TCGA-B4-5835	LIVING	0.53	1.2887	censored	0.53
TCGA-AK-3453	LIVING	83.15	1.3026	censored	83.15
TCGA-B0-5400	LIVING	56.93	1.3479	censored	56.93
TCGA-BP-4776	LIVING	13.5	1.3774	censored	13.5
TCGA-BP-5185	LIVING	37.19	1.4219	censored	37.19
TCGA-AK-3458	LIVING	38.37	1.4403	censored	38.37
TCGA-A3-3363	LIVING	10.48	1.4441	censored	10.48
TCGA-CJ-4900	DECEASED	56.31	1.4917	deceased	56.31
TCGA-B0-4841	DECEASED	6.7	1.5487	deceased	6.7
TCGA-AK-3451	LIVING	94.22	1.5995	censored	94.22
TCGA-BP-5178	DECEASED	62.81	1.6077	deceased	62.81
TCGA-CJ-4873	LIVING	74.21	1.6139	censored	74.21
TCGA-BP-4758	LIVING	72.54	1.629	censored	72.54
TCGA-CJ-4869	LIVING	83.9	1.6357	censored	83.9
TCGA-B8-A54I	LIVING	4.93	1.6666	censored	4.93
TCGA-CZ-5469	DECEASED	31.08	1.6708	deceased	31.08
TCGA-B0-4839	DECEASED	53.84	1.7572	deceased	53.84
TCGA-B0-4822	DECEASED	36.5	1.7808	deceased	36.5
TCGA-B0-4696	DECEASED	28.45	1.788	deceased	28.45
TCGA-CJ-4891	DECEASED	26.91	1.8862	deceased	26.91
TCGA-B0-4847	DECEASED	26.05	1.9423	deceased	26.05
TCGA-CJ-5678	DECEASED	18.86	1.9556	deceased	18.86
TCGA-DV-A4VX	DECEASED	53.42	1.9747	deceased	53.42
TCGA-B0-5100	DECEASED	62.84	2.0008	deceased	62.84
TCGA-B0-4698	DECEASED	1.38	2.0061	deceased	1.38
TCGA-BP-5000	LIVING	18.5	2.0076	censored	18.5
TCGA-MM-A564	LIVING	19.94	2.0099	censored	19.94
TCGA-AK-3436	LIVING	109.43	2.0358	censored	109.43
TCGA-BP-4761	LIVING	5.98	2.0382	censored	5.98
TCGA-BP-4159	DECEASED	85.45	2.1173	deceased	85.45
TCGA-G6-A8L6	DECEASED	10.28	2.1319	deceased	10.28
TCGA-BP-4981	DECEASED	36.04	2.1552	deceased	36.04
TCGA-B0-4691	DECEASED	4.57	2.2373	deceased	4.57
TCGA-B0-4821	DECEASED	40.41	2.2699	deceased	40.41
TCGA-BP-4352	DECEASED	11.3	2.356	deceased	11.3
TCGA-B0-4697	DECEASED	18.99	2.4535	deceased	18.99
TCGA-B0-4712	DECEASED	43.92	2.7492	deceased	43.92
TCGA-AK-3426	DECEASED	29.07	2.7709	deceased	29.07
TCGA-B0-5109	DECEASED	19.28	3.0764	deceased	19.28
TCGA-G6-A5PC	DECEASED	7.95	3.3366	deceased	7.95
TCGA-BP-5169	LIVING	6.34	3.5924	censored	6.34
TCGA-BP-4770	DECEASED	10.81	3.7007	deceased	10.81
TCGA-B0-5098	DECEASED	52.04	3.7426	deceased	52.04
TCGA-BP-5191	LIVING	31.77	4.0746	censored	31.77
TCGA-G6-A8L7	LIVING	70.07	4.5857	censored	70.07
TCGA-AK-3447	LIVING	39.98	4.9103	censored	39.98
TCGA-AK-3427	LIVING	117.71	5.0938	censored	117.71
TCGA-BP-5175	LIVING	30.62	5.8833	censored	30.62
TCGA-B0-5084	DECEASED	7.29	6.604	deceased	7.29

## Sheet: D
	BRCA						BLCA						GBM						AML
Patient Identifier	Overall Survival Status	Overall Survival (Months)	FPKM			Patient Identifier	Overall Survival Status	Overall Survival (Months)	FPKM			Patient Identifier	Overall Survival Status	Overall Survival (Months)	FPKM			Patient Identifier	Overall Survival Status	Overall Survival (Months)	Z-Score
TCGA-C8-A1HJ-01A	alive	0.17	21.4			TCGA-XF-AAMH-01A	dead	11.47	20			TCGA-06-5416-01A	alive	6.8	11.2			TCGA-AB-2977-03	dead	0.8	5.2542
TCGA-AQ-A54N-01A	alive	2.6	19.9			TCGA-CU-A5W6-01A	dead	1.87	18.6			TCGA-06-2569-01A	alive	0.43	10.9			TCGA-AB-2803-03	dead	25.7	3.2332
TCGA-AR-A0TU-01A	alive	23.63	19.7			TCGA-S5-A6DX-01A	dead	1.87	16.2			TCGA-06-0178-01A	dead	89.37	10.4			TCGA-AB-2986-03	dead	6.6	2.7934
TCGA-BH-A0E6-01A	alive	9.77	18.9			TCGA-G2-A2EF-01A	alive	62.8	15.9			TCGA-26-5133-01A	alive	15.07	8.1			TCGA-AB-2969-03	alive	62.3	2.494
TCGA-GM-A3NY-01A	alive	38.73	17.3			TCGA-GU-A763-01A	alive	33.23	15.9			TCGA-14-0871-01A	dead	29.33	7			TCGA-AB-2811-03	dead	8.2	2.3721
TCGA-AN-A0AR-01A	alive	0.33	16.8			TCGA-ZF-AA54-01A	dead	19.67	15			TCGA-27-2521-01A	dead	17	6.9			TCGA-AB-2834-03	dead	7.7	2.3429
TCGA-C8-A1HL-01A	alive	10.57	16.4			TCGA-CF-A5U8-01A	alive	13.3	14.9			TCGA-06-0139-01A	dead	12.07	6.7			TCGA-AB-2999-03	alive	83.3	2.2243
TCGA-E9-A5FL-01A	alive	0.8	16.2			TCGA-FT-A3EE-01A	dead	3.3	14.9			TCGA-02-2486-01A	dead	20.6	6.5			TCGA-AB-2982-03	alive	37.1	2.1605
TCGA-5T-A9QA-01A	alive	10.1	16			TCGA-G2-A2EO-01A	dead	60.13	14.8			TCGA-02-2483-01A	alive	15.53	6.3			TCGA-AB-2990-03	alive	42.1	1.9574
TCGA-A2-A25E-01A	alive	106.8	15.5			TCGA-DK-AA75-01A	dead	11.33	14.7			TCGA-19-1787-01B	dead	12.83	6.2			TCGA-AB-2925-03	dead	7.9	1.8992
TCGA-E9-A22B-01A	alive	38.9	15.4			TCGA-DK-AA6T-01A	alive	19.07	14.6			TCGA-06-0130-01A	dead	13.13	6			TCGA-AB-2856-03	dead	5.3	1.7025
TCGA-EW-A423-01A	alive	17.77	15.3			TCGA-4Z-AA86-01A	dead	10.37	14.4			TCGA-06-2563-01A	alive	31.07	6			TCGA-AB-2862-03	alive	69	1.45
TCGA-BH-A8FY-01A	dead	9.83	14.9			TCGA-BT-A20P-01A	dead	18.13	14.3			TCGA-14-0817-01A	dead	5.47	6			TCGA-AB-2833-03	dead	15.8	1.4475
TCGA-BH-A0E0-01A	alive	4.47	14.8			TCGA-XF-A9ST-01A	dead	4.27	14.3			TCGA-06-0138-01A	dead	24.57	6			TCGA-AB-2896-03	dead	7.5	1.4379
TCGA-OL-A5S0-01A	alive	20.67	14.6			TCGA-2F-A9KW-01A	dead	8.47	14.3			TCGA-27-2524-01A	dead	7.7	5.9			TCGA-AB-2897-03	alive	30.5	1.3316
TCGA-C8-A138-01A	alive	12.67	14.6			TCGA-CF-A47T-01A	dead	12.83	14			TCGA-06-0219-01A	dead	0.73	5.9			TCGA-AB-2858-03	dead	19.2	1.3147
TCGA-B6-A0RO-01A	alive	164.3	14.6			TCGA-CF-A5UA-01A	alive	12.17	13.9			TCGA-06-2570-01A	alive	31.93	5.8			TCGA-AB-2810-03	dead	1.3	1.2568
TCGA-AO-A1KR-01A	alive	83.77	14.2			TCGA-5N-A9KM-01A	dead	17.67	13.7			TCGA-06-0238-01A	dead	13.5	5.8			TCGA-AB-2921-03	dead	8.1	1.2455
TCGA-C8-A12Y-01A	alive	49.2	14.1			TCGA-ZF-A9R7-01A	alive	22.17	13.5			TCGA-06-5417-01A	alive	5.17	5.8			TCGA-AB-2819-03	alive	95.6	1.1733
TCGA-E2-A1B4-01A	dead	33.47	14			TCGA-XF-A9T6-01A	alive	2.13	13.5			TCGA-26-1442-01A	alive	31.77	5.7			TCGA-AB-2845-03	dead	9.3	1.161
TCGA-E2-A107-01A	alive	34.9	13.9			TCGA-E7-A8O8-01A	alive	0.43	13.4			TCGA-12-5295-01A	dead	15.13	5.7			TCGA-AB-2978-03	alive	44.8	1.1492
TCGA-AO-A125-01A	alive	115.2	13.7			TCGA-XF-A9SK-01A	dead	16.2	13.4			TCGA-19-4065-01A	alive	7.13	5.6			TCGA-AB-2835-03	alive	77.3	1.1376
TCGA-E2-A14O-01A	alive	45.3	13.7			TCGA-4Z-AA80-01A	dead	0.63	13.2			TCGA-28-5213-01A	alive	31.7	5.5			TCGA-AB-3005-03	alive	100.5	1.1172
TCGA-A2-A3XU-01A	dead	30.4	13.6			TCGA-GC-A6I1-01A	dead	9.07	13.2			TCGA-16-0846-01A	dead	3.97	5.5			TCGA-AB-2910-03	dead	0	1.0847
TCGA-WT-AB41-01A	alive	53.7	13.6			TCGA-E7-A6MD-01A	alive	4.3	13.2			TCGA-32-2616-01A	dead	7.47	5.4			TCGA-AB-2946-03	alive	24.4	0.9723
TCGA-EW-A6SB-01A	alive	25.33	13.2			TCGA-BT-A20V-01A	dead	5.13	13.2			TCGA-06-0686-01A	dead	14.4	5.3			TCGA-AB-2979-03	alive	47	0.9552
TCGA-AN-A0FT-01A	alive	7.13	13.1			TCGA-GU-AATO-01A	dead	10.8	13.1			TCGA-06-0745-01A	dead	7.97	5.3			TCGA-AB-2844-03	dead	3.9	0.8949
TCGA-AC-A5XS-01A	alive	19.6	13			TCGA-E5-A4U1-01A	alive	39.37	13			TCGA-12-5299-01A	dead	3.27	5.2			TCGA-AB-2935-03	dead	1.6	0.88
TCGA-A1-A0SO-01A	alive	28.4	13			TCGA-FD-A3SJ-01A	dead	24.63	13			TCGA-41-2571-01A	dead	0.87	5.2			TCGA-AB-2826-03	dead	24.1	0.8134
TCGA-LL-A5YL-01A	alive	17.3	13			TCGA-DK-A1A6-01A	alive	67.33	12.9			TCGA-06-5410-01A	dead	3.6	5.2			TCGA-AB-2981-03	alive	44.4	0.7805
TCGA-AC-A3TN-01A	alive	15.2	12.9			TCGA-CF-A47W-01A	alive	12.27	12.5			TCGA-06-5411-01A	dead	8.47	5.2			TCGA-AB-2866-03	dead	5.5	0.7568
TCGA-E2-A572-01A	alive	40.27	12.9			TCGA-DK-A1AC-01A	alive	132.7	12.5			TCGA-19-1390-01A	dead	25.73	5.1			TCGA-AB-2985-03	dead	9.2	0.7383
TCGA-LL-A6FQ-01A	alive	2.67	12.9			TCGA-ZF-A9R5-01A	alive	36.33	12.5			TCGA-28-5218-01A	dead	5.23	5.1			TCGA-AB-2860-03	dead	13.6	0.706
TCGA-OL-A5D7-01A	alive	59.33	12.8			TCGA-XF-A9SU-01A	dead	6.07	12.5			TCGA-32-1980-01A	dead	1.2	5.1			TCGA-AB-2881-03	alive	29.7	0.6725
TCGA-AR-A1AQ-01A	alive	100.7	12.8			TCGA-UY-A78N-01A	dead	88.03	12.5			TCGA-26-5134-01A	alive	5.57	5.1			TCGA-AB-2832-03	dead	11.8	0.6655
TCGA-AO-A0J9-01A	alive	53.77	12.6			TCGA-S5-AA26-01A	alive	16.77	12.4			TCGA-06-0749-01A	dead	2.73	5.1			TCGA-AB-2888-03	alive	33.5	0.6626
TCGA-A8-A06T-01A	alive	53.8	12.5			TCGA-DK-AA6Q-01A	dead	13.77	12.4			TCGA-14-1829-01A	alive	7.27	5			TCGA-AB-2841-03	dead	46.5	0.622
TCGA-LL-A50Y-01A	alive	25.4	12.4			TCGA-DK-A6B5-01A	alive	51.4	12.4			TCGA-12-0616-01A	dead	14.93	4.9			TCGA-AB-3012-03	alive	86.6	0.5897
TCGA-A2-A04U-01A	alive	88.47	12.4			TCGA-G2-A2EL-01A	dead	27.3	12.3			TCGA-19-2624-01A	dead	0.17	4.9			TCGA-AB-2824-03	dead	0.3	0.5619
TCGA-BH-A18K-01A	dead	92.1	12.3			TCGA-GU-A766-01A	alive	16	12.2			TCGA-06-0129-01A	dead	34.13	4.9			TCGA-AB-2987-03	dead	6.3	0.5579
TCGA-A2-A3XX-01A	dead	47.97	12.3			TCGA-E7-A85H-01A	alive	13.13	12.2			TCGA-06-0141-01A	dead	10.43	4.9			TCGA-AB-2975-03	dead	34	0.5531
TCGA-AN-A04D-01A	alive	1.73	12.3			TCGA-FD-A3SM-01A	dead	18.23	12.2			TCGA-02-0055-01A	dead	2.53	4.9			TCGA-AB-2938-03	dead	9.9	0.4399
TCGA-E9-A54Y-01A	alive	24.17	12.3			TCGA-E7-A519-01A	alive	16.93	12.1			TCGA-12-0821-01A	dead	10.77	4.8			TCGA-AB-3006-03	dead	15.5	0.4197
TCGA-GM-A2DB-01A	alive	80.2	12.2			TCGA-CF-A47V-01A	alive	12.63	12.1			TCGA-12-1597-01B	dead	22.5	4.7			TCGA-AB-2920-03	dead	11.8	0.4136
TCGA-LL-A7SZ-01A	alive	19.8	12.1			TCGA-GU-A762-01A	dead	7.73	12.1			TCGA-27-1832-01A	dead	10	4.6			TCGA-AB-2948-03	dead	18.1	0.3998
TCGA-A2-A0CW-01A	alive	109.43	12.1			TCGA-HQ-A2OE-01A	alive	39.13	12.1			TCGA-06-5858-01A	alive	6.23	4.6			TCGA-AB-2973-03	dead	20.5	0.3986
TCGA-BH-A0HU-01A	alive	13.07	12			TCGA-GD-A6C6-01A	alive	2.23	12			TCGA-06-0156-01A	dead	5.93	4.6			TCGA-AB-2861-03	dead	0.6	0.3797
TCGA-EW-A1PC-01B	alive	6.23	12			TCGA-ZF-A9R9-01A	dead	28.8	12			TCGA-32-5222-01A	dead	19.5	4.5			TCGA-AB-2872-03	alive	43.4	0.3545
TCGA-E9-A3X8-01A	alive	30.87	12			TCGA-ZF-A9RF-01A	alive	64.97	11.9			TCGA-06-0644-01A	dead	12.8	4.5			TCGA-AB-2830-03	dead	8.1	0.3324
TCGA-A8-A09W-01A	alive	1	12			TCGA-FD-A5C1-01A	alive	59.73	11.9			TCGA-12-3650-01A	dead	11.1	4.5			TCGA-AB-3008-03	dead	27	0.3151
TCGA-E2-A1LH-01A	alive	108.23	11.9			TCGA-XF-A9T0-01A	alive	26.63	11.8			TCGA-06-2557-01A	dead	1.1	4.5			TCGA-AB-2980-03	alive	47.5	0.2936
TCGA-GM-A5PX-01A	alive	18.37	11.9			TCGA-FJ-A871-01A	dead	9.07	11.8			TCGA-26-5136-01B	dead	19.23	4.5			TCGA-AB-2836-03	dead	17	0.2601
TCGA-HN-A2NL-01A	alive	2.63	11.9			TCGA-FD-A5BY-01A	alive	8.37	11.7			TCGA-27-1831-01A	dead	16.83	4.4			TCGA-AB-2965-03	dead	11.3	0.2567
TCGA-A7-A4SD-01A	alive	14.7	11.8			TCGA-ZF-AA58-01A	alive	54.97	11.7			TCGA-28-5220-01A	dead	12.93	4.4			TCGA-AB-2875-03	alive	27.7	0.2442
TCGA-D8-A1JS-01A	alive	12.37	11.7			TCGA-CF-A9FM-01A	alive	13.27	11.6			TCGA-06-0750-01A	dead	0.93	4.3			TCGA-AB-3000-03	alive	67.7	0.2382
TCGA-EW-A6SA-01A	alive	17	11.7			TCGA-E7-A3Y1-01A	alive	5.43	11.6			TCGA-32-1982-01A	dead	4.73	4.3			TCGA-AB-2874-03	alive	35.2	0.2228
TCGA-B6-A0IA-01A	alive	279.7	11.7			TCGA-FD-A3SN-01A	alive	29.57	11.6			TCGA-06-5413-01A	alive	8.93	4.3			TCGA-AB-2908-03	dead	1.4	0.2187
TCGA-AO-A1KQ-01A	alive	62.73	11.7			TCGA-BT-A2LB-01A	dead	16.4	11.5			TCGA-06-0184-01A	dead	70.87	4.3			TCGA-AB-2854-03	dead	11.1	0.2057
TCGA-C8-A274-01A	alive	16.93	11.6			TCGA-C4-A0F7-01A	dead	2.07	11.4			TCGA-76-4927-01A	dead	17.83	4.3			TCGA-AB-2966-03	dead	28.4	0.2017
TCGA-Z7-A8R5-01A	alive	109.57	11.5			TCGA-FD-A6TH-01A	dead	4.37	11.4			TCGA-28-2509-01A	alive	4.83	4.2			TCGA-AB-2818-03	dead	10.2	0.1606
TCGA-GM-A2D9-01A	dead	60.4	11.4			TCGA-BT-A3PH-01A	dead	4.73	11.3			TCGA-19-2629-01A	dead	24.57	4.2			TCGA-AB-2956-03	dead	5.7	0.1467
TCGA-AC-A3YJ-01A	alive	25.13	11.4			TCGA-GV-A40E-01A	dead	8.7	11.2			TCGA-32-2632-01A	dead	8.97	4.2			TCGA-AB-2867-03	dead	5.2	0.1083
TCGA-A2-A0CM-01A	dead	25.13	11.4			TCGA-DK-A6B0-01A	alive	77.67	11.2			TCGA-28-5208-01A	dead	18.13	4.2			TCGA-AB-2976-03	dead	30	0.0942
TCGA-B6-A0I5-01A	alive	285.2	11.4			TCGA-CF-A8HY-01A	alive	11.5	11.2			TCGA-06-5412-01A	dead	4.6	4.2			TCGA-AB-2927-03	dead	2.4	0.0906
TCGA-D8-A3Z6-01A	alive	18.77	11.4			TCGA-UY-A9PH-01A	alive	52.03	11.2			TCGA-14-1825-01A	dead	7.73	4.1			TCGA-AB-2915-03	dead	0.5	0.0753
TCGA-A2-A0CQ-01A	alive	89.83	11.3			TCGA-E7-A678-01A	alive	26.6	11.2			TCGA-06-0168-01A	dead	19.93	4.1			TCGA-AB-2950-03	alive	40.3	0.0636
TCGA-E2-A1AZ-01A	alive	77.63	11.3			TCGA-FD-A6TA-01A	alive	63.73	11.2			TCGA-06-0744-01A	dead	47.53	4.1			TCGA-AB-2900-03	dead	6.3	0.0284
TCGA-E2-A576-01A	alive	34.77	11.2			TCGA-ZF-AA53-01A	alive	58.7	11			TCGA-06-0878-01A	alive	7.27	4.1			TCGA-AB-2884-03	dead	24.8	0.0166
TCGA-E2-A574-01A	alive	39.3	11.2			TCGA-CF-A1HR-01A	alive	12.97	11			TCGA-26-5135-01A	dead	9	4.1			TCGA-AB-2934-03	alive	6.6	0.0139
TCGA-GM-A2DF-01A	alive	71.83	11.2			TCGA-G2-AA3D-01A	alive	71.3	11			TCGA-02-0047-01A	dead	14.93	4.1			TCGA-AB-2984-03	alive	71.3	0
TCGA-EW-A1OV-01A	alive	26.3	11.2			TCGA-XF-A8HB-01A	alive	45.67	10.9			TCGA-32-2634-01A	alive	23.1	4.1			TCGA-AB-2924-03	alive	26	-0.0289
TCGA-A2-A0CR-01A	alive	109.43	11.2			TCGA-XF-AAN1-01A	dead	31.37	10.9			TCGA-76-4928-01B	dead	3.13	4.1			TCGA-AB-3011-03	alive	81.9	-0.046
TCGA-AC-A3TM-01A	alive	25.4	11.2			TCGA-E7-A4XJ-01A	dead	2.27	10.9			TCGA-06-2558-01A	dead	12.67	4			TCGA-AB-2942-03	alive	43.5	-0.0929
TCGA-PE-A5DD-01A	alive	65.1	11.1			TCGA-BL-A3JM-01A	dead	6.83	10.9			TCGA-28-5207-01A	dead	11.43	4			TCGA-AB-2877-03	alive	41.4	-0.0936
TCGA-EW-A1P3-01A	alive	53.7	11			TCGA-DK-A3WY-01A	alive	165.57	10.9			TCGA-06-0645-01A	dead	5.83	4			TCGA-AB-2889-03	alive	34.3	-0.1027
TCGA-AO-A126-01A	alive	110.23	11			TCGA-DK-A6AV-01A	alive	65.07	10.8			TCGA-41-2572-01A	dead	13.53	4			TCGA-AB-2949-03	alive	32.6	-0.103
TCGA-C8-A12X-01A	alive	12.83	11			TCGA-H4-A2HO-01A	alive	1.53	10.8			TCGA-19-2625-01A	dead	4.13	4			TCGA-AB-2851-03	dead	7.7	-0.106
TCGA-AC-A7VB-01A	alive	8.33	10.9			TCGA-XF-A9T2-01A	dead	19.17	10.8			TCGA-06-0132-01A	dead	25.7	4			TCGA-AB-2930-03	dead	7.1	-0.1063
TCGA-LL-A6FP-01A	alive	22.57	10.9			TCGA-BT-A20T-01A	dead	15.1	10.8			TCGA-06-5408-01A	dead	11.9	3.9			TCGA-AB-2952-03	dead	1.9	-0.1119
TCGA-A2-A3Y0-01A	alive	51.53	10.9			TCGA-XF-A9SZ-01A	dead	28.63	10.8			TCGA-41-3915-01A	dead	12	3.9			TCGA-AB-2886-03	alive	29.4	-0.1266
TCGA-AR-A1AI-01A	alive	109.87	10.8			TCGA-FD-A62P-01A	dead	6.37	10.7			TCGA-12-3652-01A	dead	35.4	3.9			TCGA-AB-2918-03	dead	7.4	-0.1487
TCGA-BH-A0RX-01A	alive	5.67	10.8			TCGA-GU-AATP-01A	alive	33.43	10.7			TCGA-06-5856-01A	dead	3.8	3.8			TCGA-AB-2963-03	dead	53.9	-0.1534
TCGA-E2-A1B5-01A	alive	32.8	10.8			TCGA-XF-A9SY-01A	alive	21.33	10.7			TCGA-27-2526-01A	dead	2.9	3.8			TCGA-AB-2891-03	dead	21.5	-0.1573
TCGA-GM-A5PV-01A	alive	13.73	10.8			TCGA-ZF-A9RD-01A	dead	13.6	10.7			TCGA-14-1823-01A	dead	18.1	3.8			TCGA-AB-2916-03	alive	45.3	-0.1656
TCGA-E2-A1II-01A	alive	34.17	10.7			TCGA-4Z-AA7W-01A	alive	28	10.6			TCGA-32-4213-01A	alive	20.13	3.8			TCGA-AB-2901-03	alive	10.5	-0.2031
TCGA-OL-A66O-01A	alive	17.6	10.7			TCGA-G2-A2EC-01A	dead	23.2	10.6			TCGA-16-1045-01B	dead	29.43	3.8			TCGA-AB-2846-03	dead	45.8	-0.2159
TCGA-E2-A1IF-01A	alive	37.93	10.6			TCGA-FD-A5BS-01A	alive	54.63	10.6			TCGA-28-5216-01A	alive	13.83	3.8			TCGA-AB-2911-03	alive	61.2	-0.2211
TCGA-E2-A1B6-01A	alive	28.9	10.6			TCGA-ZF-AA4W-01A	alive	61	10.6			TCGA-06-0211-01B	dead	12	3.7			TCGA-AB-2815-03	dead	26.3	-0.2401
TCGA-AC-A3QP-01A	alive	22.5	10.6			TCGA-FD-A6TB-01A	alive	19.07	10.5			TCGA-06-0190-01A	dead	10.57	3.7			TCGA-AB-2816-03	dead	7.5	-0.2425
TCGA-E9-A1RG-01A	alive	21.57	10.6			TCGA-KQ-A41Q-01A	alive	47.63	10.5			TCGA-27-2523-01A	dead	16.3	3.7			TCGA-AB-2840-03	dead	0.7	-0.2783
TCGA-A2-A04P-01A	dead	18.27	10.6			TCGA-DK-A1AG-01A	alive	15.83	10.5			TCGA-28-1753-01A	alive	1.23	3.7			TCGA-AB-2857-03	dead	10	-0.2793
TCGA-C8-A1HG-01A	alive	11.5	10.6			TCGA-DK-A3IT-01A	alive	21.6	10.5			TCGA-76-4931-01A	dead	9.3	3.6			TCGA-AB-2823-03	dead	0.2	-0.3024
TCGA-AR-A0U3-01A	alive	136	10.4			TCGA-CF-A8HX-01A	alive	11.5	10.4			TCGA-26-5132-01A	alive	9.53	3.6			TCGA-AB-3007-03	alive	75.8	-0.3032
TCGA-AO-A0J3-01A	alive	21.7	10.4			TCGA-CF-A3MI-01A	alive	12.33	10.4			TCGA-06-2559-01A	dead	5	3.5			TCGA-AB-2943-03	dead	4.2	-0.3064
TCGA-LL-A5YM-01A	alive	15.53	10.4			TCGA-ZF-AA5N-01A	dead	5.6	10.4			TCGA-06-5418-01A	dead	2.77	3.5			TCGA-AB-2859-03	dead	10.2	-0.3091
TCGA-LL-A9Q3-01A	alive	17.73	10.4			TCGA-UY-A78M-01A	dead	23	10.4			TCGA-12-0619-01A	dead	35.4	3.5			TCGA-AB-2972-03	dead	1.5	-0.3131
TCGA-C8-A1HF-01A	alive	11.07	10.4			TCGA-DK-AA77-01A	alive	20.6	10.3			TCGA-14-2554-01A	dead	17.73	3.5			TCGA-AB-2998-03	dead	1	-0.3134
TCGA-WT-AB44-01A	alive	29.43	10.4			TCGA-FD-A43S-01A	alive	15.17	10.3			TCGA-06-0649-01B	dead	2.13	3.5			TCGA-AB-2971-03	dead	25.8	-0.3323
TCGA-BH-A42T-01A	dead	10.67	10.3			TCGA-XF-AAMG-01A	alive	112.13	10.3			TCGA-28-1747-01C	dead	2.57	3.4			TCGA-AB-2964-03	alive	59.5	-0.336
TCGA-BH-A1EN-01A	dead	70.9	10.3			TCGA-UY-A9PD-01A	alive	18.07	10.3			TCGA-15-0742-01A	dead	13.97	3.4			TCGA-AB-2955-03	dead	16.4	-0.3385
TCGA-AQ-A54O-01A	alive	33.37	10.2			TCGA-YC-A9TC-01A	dead	0.67	10.3			TCGA-14-0787-01A	dead	2.27	3.4			TCGA-AB-3001-03	alive	76.2	-0.3507
TCGA-E9-A22G-01A	alive	41.3	10.2			TCGA-CF-A47Y-01A	alive	12.43	10.2			TCGA-06-0882-01A	dead	21.07	3.4			TCGA-AB-2992-03	dead	56.3	-0.3508
TCGA-A2-A4S3-01A	alive	22.2	10.2			TCGA-E7-A5KF-01A	alive	0.67	10.2			TCGA-06-0743-01A	dead	26.77	3.4			TCGA-AB-2988-03	dead	0.8	-0.3517
TCGA-E2-A1L8-01A	alive	74.67	10.2			TCGA-DK-AA71-01A	alive	13.83	10.2			TCGA-32-2615-01A	dead	16.17	3.4			TCGA-AB-2994-03	alive	83.5	-0.3534
TCGA-AR-A0U0-01A	alive	66.27	10.2			TCGA-ZF-A9RL-01A	alive	90.1	10.2			TCGA-12-3653-01A	dead	14.73	3.4			TCGA-AB-2873-03	alive	32.7	-0.3619
TCGA-V7-A7HQ-01A	alive	67.77	10.2			TCGA-K4-A3WV-01A	alive	21.53	10.2			TCGA-27-1835-01A	dead	21.6	3.4			TCGA-AB-2805-03	dead	18.5	-0.368
TCGA-LL-A7T0-01A	alive	12.53	10.1			TCGA-4Z-AA87-01A	alive	48.47	10.2			TCGA-02-2485-01A	alive	15.67	3.4			TCGA-AB-2919-03	alive	26.8	-0.3988
TCGA-D8-A1X6-01A	alive	18.03	10.1			TCGA-FD-A3NA-01A	alive	61.5	10.1			TCGA-28-5204-01A	dead	15.13	3.3			TCGA-AB-2991-03	alive	88.3	-0.4209
TCGA-D8-A1Y3-01A	alive	14.33	10.1			TCGA-E7-A7DU-01A	alive	0.93	10.1			TCGA-27-2519-01A	dead	18.33	3.3			TCGA-AB-2983-03	dead	11.2	-0.4243
TCGA-BH-A0B9-01A	alive	52.4	10			TCGA-4Z-AA89-01A	alive	30.07	10.1			TCGA-28-2499-01A	dead	3.17	3.3			TCGA-AB-2837-03	dead	0.7	-0.4369
TCGA-AC-A2BM-01A	alive	100.73	10			TCGA-FD-A43X-01A	alive	3.67	10			TCGA-08-0386-01A	dead	18.27	3.3			TCGA-AB-2842-03	dead	0.3	-0.444
TCGA-D8-A1XL-01A	alive	20.2	10			TCGA-UY-A9PB-01A	alive	29.97	10			TCGA-28-2513-01A	alive	7.4	3.3			TCGA-AB-2820-03	dead	0.3	-0.453
TCGA-E2-A14Q-01A	alive	38.77	10			TCGA-XF-A9T5-01A	alive	67.57	10			TCGA-06-1804-01A	dead	13.8	3.3			TCGA-AB-2808-03	alive	118.1	-0.4573
TCGA-GM-A3XG-01A	alive	44.33	10			TCGA-GD-A2C5-01A	alive	27.07	9.9			TCGA-06-2565-01A	dead	16.87	3.3			TCGA-AB-2931-03	dead	0.1	-0.4664
TCGA-D8-A27N-01A	alive	17.3	10			TCGA-CF-A9FF-01A	alive	12.03	9.8			TCGA-27-1837-01A	dead	14.23	3.3			TCGA-AB-2879-03	alive	31.9	-0.4701
TCGA-A2-A0ET-01A	alive	35.53	10			TCGA-ZF-A9R3-01A	dead	31.63	9.8			TCGA-27-1830-01A	dead	5.13	3.3			TCGA-AB-2868-03	dead	4.5	-0.49
TCGA-GM-A2DO-01A	alive	86.53	9.9			TCGA-XF-A9SJ-01A	dead	3.27	9.8			TCGA-41-4097-01A	dead	0.2	3.3			TCGA-AB-2914-03	alive	48.3	-0.5053
TCGA-B6-A0IO-01A	alive	168.07	9.9			TCGA-4Z-AA83-01A	alive	67.47	9.7			TCGA-12-0618-01A	dead	13.17	3.2			TCGA-AB-2869-03	alive	27.1	-0.5087
TCGA-AO-A0JC-01A	alive	51.57	9.9			TCGA-CF-A9FL-01A	dead	18.83	9.7			TCGA-28-5215-01A	dead	11.17	3.2			TCGA-AB-2870-03	dead	4.5	-0.5094
TCGA-C8-A3M7-01A	dead	34.47	9.9			TCGA-FD-A5BV-01A	dead	5.43	9.7			TCGA-76-4929-01A	dead	3.7	3.2			TCGA-AB-2929-03	dead	4.6	-0.5364
TCGA-AN-A0FK-01A	alive	7.1	9.9			TCGA-ZF-AA4V-01A	alive	60.2	9.7			TCGA-76-4925-01A	dead	4.87	3.2			TCGA-AB-2940-03	dead	55.4	-0.5674
TCGA-E2-A2P6-01A	alive	35.03	9.9			TCGA-2F-A9KT-01A	alive	110.47	9.6			TCGA-06-0210-01A	dead	7.5	3.2			TCGA-AB-2880-03	dead	20.5	-0.5778
TCGA-UL-AAZ6-01A	alive	17.27	9.8			TCGA-DK-AA6X-01A	alive	15.57	9.5			TCGA-76-4932-01A	dead	48.6	3.1			TCGA-AB-2806-03	dead	30.6	-0.5875
TCGA-LD-A66U-01A	alive	21.53	9.8			TCGA-KQ-A41R-01A	alive	45	9.5			TCGA-06-5859-01A	alive	4.63	3.1			TCGA-AB-2959-03	dead	15.4	-0.5929
TCGA-E2-A2P5-01A	dead	27.37	9.8			TCGA-ZF-A9RN-01A	dead	20.5	9.5			TCGA-06-2564-01A	alive	6.03	3.1			TCGA-AB-2812-03	dead	11.5	-0.615
TCGA-A2-A0EQ-01A	alive	80.87	9.7			TCGA-ZF-A9R1-01A	alive	25.77	9.5			TCGA-06-0174-01A	dead	3.27	3.1			TCGA-AB-2939-03	alive	36.9	-0.6156
TCGA-B6-A0IG-01A	dead	148.53	9.7			TCGA-LC-A66R-01A	alive	15.53	9.5			TCGA-06-2562-01A	dead	12.73	3.1			TCGA-AB-2882-03	dead	11	-0.623
TCGA-E2-A1LL-01A	alive	43.63	9.7			TCGA-UY-A8OB-01A	alive	70.3	9.5			TCGA-14-0781-01B	dead	0.97	3.1			TCGA-AB-2932-03	alive	42.1	-0.6237
TCGA-AN-A0FJ-01A	alive	8.07	9.7			TCGA-C4-A0EZ-01A	dead	9.1	9.4			TCGA-28-2514-01A	alive	5.33	3			TCGA-AB-2813-03	dead	1.3	-0.6394
TCGA-A8-A07R-01A	alive	9.1	9.7			TCGA-R3-A69X-01A	alive	14.43	9.4			TCGA-14-0790-01B	dead	13.97	3			TCGA-AB-2814-03	dead	26.3	-0.6534
TCGA-LL-A5YN-01A	alive	14.9	9.6			TCGA-PQ-A6FN-01A	alive	16.9	9.4			TCGA-06-5414-01A	alive	9.1	3			TCGA-AB-2954-03	alive	68.3	-0.6765
TCGA-AN-A0AJ-01A	alive	10.1	9.6			TCGA-E7-A97Q-01A	dead	8.2	9.4			TCGA-06-0157-01A	dead	3.23	2.9			TCGA-AB-2853-03	dead	3.1	-0.689
TCGA-AQ-A1H2-01A	alive	15.83	9.6			TCGA-XF-AAMZ-01A	dead	44.93	9.4			TCGA-06-0747-01A	dead	2.73	2.9			TCGA-AB-2933-03	dead	4.6	-0.6895
TCGA-BH-A1FJ-01A	dead	64.23	9.6			TCGA-DK-A6B2-01A	alive	15.9	9.4			TCGA-32-1970-01A	dead	15.6	2.9			TCGA-AB-2970-03	dead	10.7	-0.6937
TCGA-EW-A1IZ-01A	alive	18.47	9.6			TCGA-ZF-AA5H-01A	alive	29.9	9.3			TCGA-06-0125-01A	dead	48.27	2.9			TCGA-AB-3002-03	dead	46.8	-0.703
TCGA-D8-A3Z5-01A	alive	33.83	9.6			TCGA-BL-A5ZZ-01A	alive	12.57	9.2			TCGA-27-2528-01A	dead	16	2.8			TCGA-AB-2828-03	alive	99.9	-0.7407
TCGA-B6-A0RH-01A	dead	215.2	9.5			TCGA-FJ-A3ZF-01A	alive	17.47	9.2			TCGA-06-2561-01A	dead	17.9	2.8			TCGA-AB-2839-03	dead	16.3	-0.7416
TCGA-A2-A04X-01A	alive	56.2	9.5			TCGA-XF-A8HG-01A	dead	15.57	9.2			TCGA-15-1444-01A	dead	51.23	2.8			TCGA-AB-2903-03	dead	0.4	-0.7527
TCGA-E9-A295-01A	alive	12.5	9.5			TCGA-UY-A8OC-01A	dead	3.07	9.2			TCGA-19-5960-01A	dead	15.17	2.8			TCGA-AB-2863-03	dead	1.2	-0.7533
TCGA-AN-A0XR-01A	alive	0.33	9.5			TCGA-CF-A7I0-01A	alive	12.27	9.1			TCGA-27-1834-01A	dead	41.1	2.8			TCGA-AB-2847-03	dead	52.7	-0.7654
TCGA-OL-A66N-01A	alive	26.4	9.5			TCGA-BT-A42C-01A	alive	29.1	9.1			TCGA-41-5651-01A	dead	15.33	2.8			TCGA-AB-2967-03	alive	56.5	-0.789
TCGA-AC-A62V-01A	dead	11.6	9.5			TCGA-E7-A677-01A	alive	27.33	9.1			TCGA-26-5139-01A	alive	1.6	2.7			TCGA-AB-2899-03	dead	22.3	-0.8083
TCGA-B6-A0WZ-01A	alive	209.73	9.4			TCGA-K4-A4AB-01B	alive	2.8	9.1			TCGA-76-4926-01B	dead	4.6	2.7			TCGA-AB-2913-03	alive	52.6	-0.8228
TCGA-A7-A26J-01A	alive	20.9	9.4			TCGA-GU-A42R-01A	dead	19.23	9.1			TCGA-06-0646-01A	dead	5.83	2.7			TCGA-AB-2995-03	alive	73.6	-0.8281
TCGA-EW-A2FW-01A	alive	22.4	9.4			TCGA-CF-A3MH-01A	alive	13.27	9			TCGA-06-2567-01A	dead	4.43	2.7			TCGA-AB-2825-03	dead	7.5	-0.8305
TCGA-GM-A3NW-01A	alive	112.03	9.4			TCGA-XF-A8HI-01A	dead	18.13	9			TCGA-32-2638-01A	dead	25.53	2.6			TCGA-AB-2871-03	alive	22.6	-0.8431
TCGA-AN-A03Y-01A	alive	0.33	9.4			TCGA-4Z-AA81-01A	dead	42.33	8.9			TCGA-06-0158-01A	dead	10.97	2.6			TCGA-AB-2887-03	dead	17.4	-0.8525
TCGA-AN-A04C-01A	alive	1.8	9.4			TCGA-UY-A78P-01A	alive	79.33	8.9			TCGA-28-5209-01A	alive	2.57	2.6			TCGA-AB-2848-03	dead	14.5	-0.8625
TCGA-C8-A26Z-01A	alive	15.67	9.4			TCGA-YC-A89H-01A	alive	19.1	8.9			TCGA-06-0187-01A	dead	27.6	2.5			TCGA-AB-2895-03	dead	5.7	-0.868
TCGA-E2-A573-01A	alive	35.4	9.3			TCGA-DK-A2I1-01A	alive	18.2	8.9			TCGA-14-1034-01A	dead	16.17	2.5			TCGA-AB-2890-03	dead	0.5	-0.8709
TCGA-LL-A6FR-01A	alive	16.3	9.3			TCGA-FD-A6TC-01A	alive	6.23	8.9			TCGA-19-2620-01A	dead	4.93	2.5			TCGA-AB-2838-03	dead	12.4	-0.8791
TCGA-E2-A1BD-01A	alive	37.77	9.3			TCGA-GV-A3QK-01B	alive	27.73	8.9			TCGA-14-0789-01A	dead	11.4	2.1			TCGA-AB-2917-03	alive	57.3	-0.943
TCGA-AO-A0J6-01A	alive	38	9.3			TCGA-CF-A47X-01A	alive	12.8	8.8			TCGA-19-2619-01A	alive	9.8	2.1			TCGA-AB-2855-03	dead	7.2	-0.9723
TCGA-BH-A0BT-01A	alive	78.83	9.3			TCGA-FD-A5BT-01A	dead	10.93	8.8									TCGA-AB-2912-03	dead	8.4	-0.9803
TCGA-A2-A3XW-01A	alive	57.07	9.3			TCGA-BT-A20Q-01A	dead	19.77	8.8									TCGA-AB-2996-03	alive	73	-1.0001
TCGA-EW-A424-01A	alive	23.83	9.3			TCGA-DK-A3IS-01A	alive	50.97	8.7									TCGA-AB-2843-03	dead	6.3	-1.0095
TCGA-E2-A1LE-01A	dead	29.3	9.3			TCGA-2F-A9KQ-01A	alive	96.2	8.7									TCGA-AB-2944-03	dead	2.4	-1.0132
TCGA-UU-A93S-01A	dead	3.87	9.3			TCGA-BT-A42E-01A	alive	36.93	8.7									TCGA-AB-2885-03	dead	7	-1.0202
TCGA-B6-A0X0-01A	dead	131.5	9.2			TCGA-BT-A20W-01A	dead	8.47	8.6									TCGA-AB-2993-03	dead	24.6	-1.0285
TCGA-A7-A6VW-01A	alive	9.5	9.2			TCGA-XF-A9SM-01A	alive	34.93	8.6									TCGA-AB-2909-03	alive	26.1	-1.135
TCGA-A2-A3XV-01A	alive	33.2	9.2			TCGA-BT-A2LA-01A	alive	17.4	8.6									TCGA-AB-2898-03	alive	36.1	-1.1719
TCGA-E2-A15G-01A	alive	18.47	9.2			TCGA-GC-A6I3-01A	alive	14.1	8.6									TCGA-AB-2928-03	dead	4	-1.1975
TCGA-AR-A0TY-01A	dead	56.63	9.2			TCGA-FD-A3SL-01A	dead	23.73	8.6									TCGA-AB-2817-03	dead	9.3	-1.2114
TCGA-A7-A56D-01A	alive	14.93	9.2			TCGA-4Z-AA7Y-01A	alive	50.73	8.5									TCGA-AB-2936-03	alive	13.8	-1.2159
TCGA-BH-A0GZ-01A	alive	10.93	9.2			TCGA-DK-AA6W-01A	dead	13.83	8.5									TCGA-AB-2865-03	dead	2.3	-1.2216
TCGA-BH-A0BM-01A	alive	62.53	9.2			TCGA-FD-A6TG-01A	dead	3.1	8.5									TCGA-AB-2849-03	alive	95.5	-1.3317
TCGA-E9-A227-01A	alive	32.5	9.2			TCGA-FD-A3SQ-01A	dead	47.43	8.5									TCGA-AB-2807-03	dead	4.9	-1.3444
TCGA-5L-AAT1-01A	alive	49.03	9.2			TCGA-E7-A5KE-01A	alive	0.57	8.4									TCGA-AB-3009-03	dead	19	-1.3457
TCGA-A8-A099-01A	alive	10.13	9.2			TCGA-BT-A20J-01A	dead	19.3	8.4									TCGA-AB-2941-03	dead	0.2	-1.3601
TCGA-BH-A18S-01A	dead	66.97	9.1			TCGA-FD-A3B6-01A	dead	33.5	8.4									TCGA-AB-2904-03	dead	17.1	-1.3651
TCGA-BH-A18R-01A	dead	38.07	9.1			TCGA-FD-A5BU-01A	alive	19.6	8.4									TCGA-AB-2821-03	dead	27.4	-1.3817
TCGA-OL-A5D8-01A	alive	32.43	9.1			TCGA-DK-AA74-01A	alive	56.93	8.4									TCGA-AB-2937-03	dead	8	-1.5045
TCGA-PL-A8LY-01A	alive	0.27	9.1			TCGA-BT-A20O-01A	dead	12.33	8.4									TCGA-AB-2822-03	dead	32.3	-1.5051
TCGA-BH-A0DS-01A	alive	2.6	9.1			TCGA-G2-AA3C-01A	dead	7.03	8.4
TCGA-A2-A0SW-01A	dead	45.5	9.1			TCGA-XF-AAN0-01A	dead	57.27	8.4
TCGA-GM-A2DL-01A	alive	117.3	9			TCGA-ZF-A9RC-01A	alive	95.6	8.3
TCGA-OL-A66L-01A	alive	43.37	9			TCGA-K4-A5RI-01A	dead	11.87	8.3
TCGA-E2-A105-01A	alive	43.6	9			TCGA-XF-AAN3-01A	alive	87.5	8.3
TCGA-BH-A0C0-01A	alive	42.33	9			TCGA-GV-A3JZ-01A	alive	20.1	8.3
TCGA-A7-A5ZV-01A	alive	12.27	9			TCGA-FD-A5BR-01A	alive	27.1	8.2
TCGA-E9-A3HO-01A	alive	38.6	9			TCGA-XF-AAN5-01A	alive	76.43	8.2
TCGA-C8-A137-01A	alive	12.63	9			TCGA-FD-A43Y-01A	dead	15.8	8.2
TCGA-B6-A409-01A	dead	19.1	9			TCGA-DK-A1AA-01A	alive	19.27	8.2
TCGA-E9-A6HE-01A	alive	28.23	9			TCGA-CF-A27C-01A	alive	14.17	8.2
TCGA-AN-A0FS-01A	alive	7	8.9			TCGA-DK-A1A3-01A	dead	22.17	8.2
TCGA-GM-A3XL-01A	alive	70.27	8.9			TCGA-C4-A0F0-01A	alive	1.97	8.1
TCGA-S3-AA17-01A	alive	14.13	8.9			TCGA-XF-A9SH-01A	dead	65.7	8.1
TCGA-A8-A09I-01A	alive	45.7	8.9			TCGA-ZF-A9R0-01A	dead	22.67	8.1
TCGA-A1-A0SF-01A	alive	48.77	8.8			TCGA-FD-A3SO-01A	dead	5.6	8.1
TCGA-OL-A5RY-01A	alive	25.07	8.8			TCGA-4Z-AA82-01A	dead	51.87	8.1
TCGA-A2-A0CV-01A	alive	100.37	8.8			TCGA-UY-A8OD-01A	alive	114.4	8
TCGA-BH-A1FL-01A	dead	55.77	8.8			TCGA-GU-A764-01A	alive	20.33	8
TCGA-D8-A1X9-01A	alive	24.23	8.8			TCGA-BT-A0S7-01A	dead	6.67	8
TCGA-A8-A07L-01A	alive	32.5	8.8			TCGA-CU-A0YN-01A	dead	13.1	8
TCGA-A7-A0CE-01A	alive	35.8	8.7			TCGA-XF-A8HF-01A	dead	98.47	8
TCGA-W8-A86G-01A	alive	11.57	8.7			TCGA-FD-A5BX-01A	dead	5.77	8
TCGA-C8-A12N-01A	alive	11.93	8.7			TCGA-FD-A43U-01A	alive	21.2	8
TCGA-D8-A73U-01A	alive	16.4	8.7			TCGA-E7-A4IJ-01A	dead	22.47	7.9
TCGA-E9-A249-01A	alive	7.23	8.7			TCGA-DK-A3IU-01A	dead	23.53	7.9
TCGA-E2-A1L9-01A	alive	19.93	8.7			TCGA-E7-A7PW-01A	alive	13.87	7.9
TCGA-A7-A4SF-01A	alive	18.17	8.7			TCGA-DK-A3X2-01A	dead	18.23	7.9
TCGA-AO-A1KP-01A	alive	98.43	8.7			TCGA-4Z-AA84-01A	alive	15.33	7.9
TCGA-LD-A7W6-01A	alive	13.47	8.7			TCGA-DK-A3IK-01A	dead	4.87	7.9
TCGA-E2-A15K-01A	alive	9.17	8.7			TCGA-E7-A6ME-01A	alive	24.37	7.8
TCGA-AC-A2BK-01A	alive	74.07	8.7			TCGA-K4-AAQO-01A	alive	11.97	7.8
TCGA-A7-A425-01A	alive	14.9	8.7			TCGA-FD-A3B4-01A	dead	17	7.8
TCGA-E2-A1LA-01A	alive	24.93	8.7			TCGA-XF-A9SW-01A	dead	12.07	7.8
TCGA-Z7-A8R6-01A	alive	108.53	8.6			TCGA-CF-A3MG-01A	alive	12.3	7.7
TCGA-LL-A5YO-01A	alive	14.67	8.6			TCGA-GU-A42Q-01A	dead	11.47	7.7
TCGA-BH-A42V-01A	alive	21.17	8.6			TCGA-DK-A3IN-01A	dead	8.33	7.7
TCGA-D8-A1JJ-01A	alive	20.37	8.6			TCGA-CF-A3MF-01A	alive	12.77	7.7
TCGA-D8-A1Y2-01A	alive	14.43	8.6			TCGA-XF-A8HH-01A	dead	1.9	7.7
TCGA-E9-A244-01A	alive	0.7	8.6			TCGA-FD-A43P-01A	alive	27.73	7.6
TCGA-EW-A3E8-01B	alive	34.5	8.6			TCGA-BL-A13I-01A	dead	7.43	7.6
TCGA-D8-A1XR-01A	alive	16.07	8.6			TCGA-GC-A3I6-01A	dead	21	7.6
TCGA-GM-A2DA-01A	dead	219.77	8.6			TCGA-K4-A6MB-01A	alive	15.63	7.6
TCGA-AO-A03L-01A	alive	81.4	8.6			TCGA-YF-AA3L-01A	alive	12.13	7.5
TCGA-E9-A5FK-01A	alive	27.07	8.6			TCGA-YF-AA3M-01A	alive	13.83	7.5
TCGA-D8-A1JN-01A	alive	20.67	8.6			TCGA-GC-A3OO-01A	alive	16.03	7.5
TCGA-A2-A0CS-01A	dead	78.27	8.6			TCGA-XF-AAMQ-01A	alive	72.57	7.5
TCGA-A2-A0T2-01A	dead	8.5	8.6			TCGA-DK-A3WW-01A	alive	21.1	7.5
TCGA-A8-A07S-01A	alive	8.1	8.6			TCGA-BT-A42F-01A	alive	28.8	7.5
TCGA-A8-A092-01A	alive	31.4	8.6			TCGA-XF-A9T3-01A	alive	2.27	7.5
TCGA-E2-A15J-01A	alive	54.67	8.5			TCGA-FD-A5C0-01A	dead	18.33	7.5
TCGA-A2-A04Q-01A	alive	79.5	8.5			TCGA-XF-AAMW-01A	dead	8.43	7.5
TCGA-BH-A5J0-01A	alive	23.83	8.5			TCGA-GC-A3YS-01A	alive	25.27	7.5
TCGA-BH-A2L8-01A	alive	20.4	8.5			TCGA-KQ-A41O-01A	alive	51.27	7.4
TCGA-A7-A0CJ-01A	alive	31.03	8.5			TCGA-ZF-AA52-01A	dead	35.9	7.4
TCGA-BH-A203-01A	dead	39.13	8.5			TCGA-XF-AAMR-01A	alive	93	7.4
TCGA-B6-A40C-01A	alive	72.13	8.5			TCGA-XF-A9SX-01A	dead	23.97	7.4
TCGA-BH-A18U-01A	dead	52.1	8.5			TCGA-GV-A3JV-01A	dead	14.47	7.4
TCGA-S3-AA12-01A	alive	19.13	8.5			TCGA-CU-A72E-01A	dead	13.77	7.4
TCGA-C8-A1HK-01A	alive	12.2	8.5			TCGA-GC-A3RD-01A	alive	14.27	7.3
TCGA-A2-A3XZ-01A	alive	51.07	8.4			TCGA-DK-A3X1-01A	alive	66.97	7.3
TCGA-OL-A6VO-01A	alive	28.6	8.4			TCGA-GC-A3RB-01A	alive	19.4	7.3
TCGA-EW-A1PH-01A	alive	20.23	8.4			TCGA-SY-A9G5-01A	alive	39.53	7.3
TCGA-E9-A1RD-01A	alive	1.13	8.4			TCGA-CU-A3YL-01A	alive	30.2	7.3
TCGA-OL-A66P-01A	alive	14.27	8.4			TCGA-UY-A78K-01A	dead	17.87	7.3
TCGA-E9-A1NC-01A	alive	40.1	8.4			TCGA-UY-A78L-01A	alive	37.57	7.3
TCGA-BH-A204-01A	dead	84.47	8.4			TCGA-GU-A767-01A	dead	4.8	7.3
TCGA-EW-A2FS-01A	alive	53.47	8.4			TCGA-E7-A7DV-01A	alive	1.23	7.3
TCGA-E2-A1IG-01A	alive	71.33	8.4			TCGA-UY-A78O-01A	alive	77.07	7.2
TCGA-A2-A0CY-01A	alive	55.77	8.4			TCGA-YC-A8S6-01A	alive	9.77	7.2
TCGA-AC-A3BB-01A	alive	32.9	8.4			TCGA-G2-A3IB-01A	dead	7.33	7.2
TCGA-AR-A5QQ-01A	dead	10.73	8.4			TCGA-ZF-AA56-01A	dead	8.63	7.2
TCGA-BH-A0BC-01A	alive	32.47	8.4			TCGA-5N-A9KI-01A	dead	2.53	7.2
TCGA-A8-A08J-01A	dead	37.57	8.4			TCGA-E7-A7XN-01A	alive	14.27	7.2
TCGA-E2-A106-01A	alive	84.7	8.3			TCGA-XF-A9SL-01A	dead	67.33	7.2
TCGA-BH-A42U-01A	alive	112.13	8.3			TCGA-UY-A9PE-01A	alive	6.3	7.2
TCGA-E9-A1NI-01A	alive	10	8.3			TCGA-HQ-A5NE-01A	dead	12.33	7.1
TCGA-A2-A0D0-01A	alive	68.27	8.3			TCGA-LT-A8JT-01A	alive	21.37	7.1
TCGA-E9-A1NA-01A	alive	37.07	8.3			TCGA-4Z-AA7O-01A	alive	17.07	7.1
TCGA-E9-A5UO-01A	alive	26.17	8.3			TCGA-CF-A47S-01A	alive	11.1	7.1
TCGA-S3-A6ZF-01A	alive	19.07	8.3			TCGA-XF-A9SP-01A	dead	15.13	7.1
TCGA-BH-A0W3-01A	alive	24.27	8.3			TCGA-FD-A62N-01A	alive	2.73	7.1
TCGA-BH-A0DT-01A	alive	80.1	8.3			TCGA-FD-A6TD-01A	dead	12.87	7.1
TCGA-BH-A0HO-01A	alive	2.53	8.3			TCGA-K4-A5RH-01A	alive	9.2	7.1
TCGA-E2-A10C-01A	alive	40.67	8.3			TCGA-FD-A3B7-01A	dead	4.07	7.1
TCGA-AR-A2LH-01A	dead	20.53	8.3			TCGA-H4-A2HQ-01A	alive	19.67	7.1
TCGA-D8-A1Y1-01A	dead	10.07	8.3			TCGA-FJ-A3Z9-01A	dead	12.83	7
TCGA-E9-A1RI-01A	alive	48.3	8.3			TCGA-FD-A43N-01A	alive	7.67	7
TCGA-BH-A18L-01A	dead	27.03	8.3			TCGA-FD-A6TK-01A	alive	11	7
TCGA-AC-A6IX-01A	alive	12.43	8.3			TCGA-XF-AAN4-01A	dead	27.43	7
TCGA-A7-A5ZX-01A	alive	11.2	8.3			TCGA-XF-A9T4-01A	dead	16.5	7
TCGA-B6-A0WW-01A	dead	18.6	8.3			TCGA-UY-A9PF-01A	alive	3.9	7
TCGA-B6-A0RE-01A	alive	259.23	8.3			TCGA-ZF-AA51-01A	alive	57.13	6.9
TCGA-A7-A3IY-01A	alive	11.5	8.2			TCGA-DK-A3IV-01A	dead	9.8	6.9
TCGA-GM-A2DH-01A	alive	73.1	8.2			TCGA-ZF-AA4N-01A	dead	2.93	6.9
TCGA-OL-A5RZ-01A	alive	22.63	8.2			TCGA-GD-A3OS-01A	alive	21.27	6.9
TCGA-BH-A0EB-01A	alive	24.83	8.2			TCGA-XF-A9SI-01A	alive	80.77	6.9
TCGA-AO-A0J8-01A	alive	22.67	8.2			TCGA-4Z-AA7M-01A	alive	16.5	6.9
TCGA-AN-A0FD-01A	alive	6.53	8.2			TCGA-XF-A9T8-01A	dead	13.93	6.9
TCGA-AO-A129-01A	alive	109.53	8.2			TCGA-4Z-AA7S-01A	dead	35.47	6.9
TCGA-A2-A04Y-01A	alive	36.63	8.2			TCGA-BT-A3PJ-01A	alive	26.3	6.9
TCGA-D8-A27R-01A	alive	10.23	8.2			TCGA-4Z-AA7R-01A	dead	17.4	6.9
TCGA-GM-A4E0-01A	alive	73.03	8.2			TCGA-FD-A6TF-01A	dead	2.3	6.9
TCGA-A8-A08O-01A	alive	31.43	8.2			TCGA-HQ-A2OF-01A	alive	64.9	6.8
TCGA-E2-A1IH-01A	alive	34.2	8.1			TCGA-GD-A76B-01A	dead	7.47	6.8
TCGA-OL-A66K-01A	dead	42.5	8.1			TCGA-K4-A4AC-01A	dead	9.27	6.8
TCGA-AR-A1AW-01A	alive	87.73	8.1			TCGA-G2-A3IE-01A	dead	20.4	6.8
TCGA-C8-A130-01A	alive	12.33	8.1			TCGA-CU-A0YR-01A	dead	15.33	6.8
TCGA-D8-A73W-01A	dead	12.83	8.1			TCGA-DK-A1AF-01A	alive	17.87	6.8
TCGA-B6-A408-01A	alive	69.07	8.1			TCGA-FD-A6TI-01A	dead	9.8	6.8
TCGA-B6-A0IP-01A	dead	130.87	8			TCGA-E7-A541-01A	dead	25.93	6.7
TCGA-B6-A0RN-01A	alive	266.93	8			TCGA-GV-A40G-01A	alive	19.33	6.7
TCGA-E2-A1IK-01A	alive	60	8			TCGA-GC-A4ZW-01A	alive	0.5	6.7
TCGA-A2-A04V-01A	dead	64	8			TCGA-UY-A9PA-01A	alive	3.97	6.7
TCGA-D8-A143-01A	alive	14.37	8			TCGA-DK-A3IM-01A	dead	8.27	6.7
TCGA-AN-A049-01A	alive	0.63	8			TCGA-DK-A2I4-01A	alive	144.77	6.7
TCGA-D8-A73X-01A	alive	25.57	8			TCGA-KQ-A41N-01A	alive	53.47	6.7
TCGA-E9-A22D-01A	alive	41.6	8			TCGA-K4-A3WU-01B	alive	3.5	6.7
TCGA-AC-A6NO-01A	alive	1.7	8			TCGA-K4-A6FZ-01A	alive	1.83	6.7
TCGA-BH-A0DH-01A	alive	38.53	8			TCGA-DK-A3IL-01A	dead	13.77	6.7
TCGA-MS-A51U-01A	alive	22.7	8			TCGA-BT-A20N-01A	dead	26.5	6.6
TCGA-B6-A0WV-01A	dead	80.57	8			TCGA-PQ-A6FI-01A	alive	12.4	6.6
TCGA-E2-A15S-01A	alive	14.27	8			TCGA-DK-A1AE-01A	alive	16.37	6.6
TCGA-AR-A251-01A	alive	101	8			TCGA-BT-A2LD-01A	dead	20.77	6.6
TCGA-A7-A426-01A	alive	12.13	8			TCGA-2F-A9KO-01A	dead	24.47	6.6
TCGA-A8-A06R-01A	alive	18.23	8			TCGA-K4-A5RJ-01A	alive	17.97	6.5
TCGA-GM-A2DD-01A	alive	76.07	7.9			TCGA-XF-AAML-01A	dead	7.73	6.5
TCGA-E2-A14Z-01A	dead	18.77	7.9			TCGA-G2-A2EJ-01A	alive	48.67	6.5
TCGA-EW-A1J3-01A	alive	16.8	7.9			TCGA-G2-A2ES-01A	dead	33.47	6.5
TCGA-AO-A128-01A	alive	108.27	7.9			TCGA-G2-AA3B-01A	alive	66.93	6.5
TCGA-AO-A12A-01A	alive	103.73	7.9			TCGA-XF-A8HD-01A	alive	98.8	6.5
TCGA-BH-A0AW-01A	alive	20.73	7.9			TCGA-DK-AA6L-01A	dead	38.77	6.5
TCGA-E2-A1L6-01A	alive	54.93	7.9			TCGA-K4-A83P-01A	alive	16.5	6.5
TCGA-AR-A256-01A	dead	95.13	7.9			TCGA-CU-A0YO-01A	dead	4.97	6.5
TCGA-A7-A0CH-01A	alive	35.97	7.9			TCGA-HQ-A5ND-01A	dead	9.13	6.4
TCGA-AO-A124-01A	alive	116.87	7.9			TCGA-E7-A6MF-01A	alive	25	6.4
TCGA-AO-A12F-01A	alive	61.4	7.9			TCGA-DK-A1A5-01A	dead	2.17	6.4
TCGA-A2-A0CZ-01A	alive	53.87	7.9			TCGA-K4-A3WS-01A	alive	25.37	6.4
TCGA-AO-A03R-01A	alive	69.7	7.9			TCGA-ZF-AA5P-01A	alive	12.4	6.4
TCGA-LL-A5YP-01A	alive	15	7.9			TCGA-BT-A20X-01A	dead	8.37	6.4
TCGA-C8-A1HE-01A	alive	12.5	7.9			TCGA-ZF-AA4T-01A	dead	19.97	6.4
TCGA-AO-A0JM-01A	alive	72.8	7.9			TCGA-GV-A6ZA-01A	alive	23.03	6.3
TCGA-A8-A07O-01A	alive	10.13	7.9			TCGA-XF-AAMY-01A	alive	100.37	6.3
TCGA-A8-A08P-01A	alive	31.43	7.8			TCGA-GD-A3OQ-01A	alive	3.17	6.3
TCGA-A8-A075-01A	alive	17.27	7.8			TCGA-KQ-A41P-01A	alive	36.47	6.3
TCGA-A8-A07Z-01A	alive	45.7	7.8			TCGA-DK-A2I2-01A	dead	7.9	6.3
TCGA-BH-A0DX-01A	alive	71.87	7.8			TCGA-XF-A9SV-01A	dead	12.93	6.3
TCGA-BH-A0BQ-01A	alive	75.17	7.8			TCGA-XF-AAME-01A	dead	94.27	6.2
TCGA-A2-A0EM-01A	alive	103.13	7.8			TCGA-DK-A6AW-01A	alive	54.03	6.2
TCGA-A2-A0CP-01A	alive	93.77	7.8			TCGA-FD-A3SP-01A	alive	26.1	6.2
TCGA-E2-A570-01A	alive	31.03	7.8			TCGA-4Z-AA7N-01A	dead	45.57	6.2
TCGA-AO-A1KT-01A	alive	18.03	7.8			TCGA-XF-AAMT-01A	dead	3	6.2
TCGA-E9-A1N8-01A	alive	34.63	7.8			TCGA-FD-A3SS-01A	dead	13.03	6.2
TCGA-BH-A6R8-01A	alive	9.77	7.8			TCGA-DK-AA6U-01A	alive	19.27	6.1
TCGA-B6-A401-01A	alive	86.53	7.8			TCGA-XF-AAMJ-01A	dead	55.67	6.1
TCGA-PE-A5DE-01A	alive	88.17	7.8			TCGA-BL-A13J-01A	dead	2.7	6.1
TCGA-A2-A25C-01A	alive	17.43	7.8			TCGA-BT-A0YX-01A	dead	13.33	6
TCGA-C8-A12P-01A	alive	11.93	7.8			TCGA-XF-AAN8-01A	dead	3.93	6
TCGA-B6-A0X4-01A	dead	28.67	7.8			TCGA-FD-A62O-01A	dead	7.2	6
TCGA-C8-A278-01A	alive	9.9	7.8			TCGA-G2-AA3F-01A	alive	29.77	6
TCGA-AO-A0JG-01A	alive	26.6	7.8			TCGA-FD-A3B8-01A	alive	12.8	5.9
TCGA-GM-A3XN-01A	alive	67.3	7.8			TCGA-ZF-A9RE-01A	dead	3.53	5.9
TCGA-E2-A1LK-01A	dead	8.87	7.8			TCGA-DK-AA6P-01A	alive	15.23	5.9
TCGA-LL-A73Z-01A	dead	7.57	7.8			TCGA-ZF-A9R4-01A	alive	30.7	5.9
TCGA-JL-A3YX-01A	alive	11.73	7.7			TCGA-FD-A3B3-01A	dead	32.47	5.9
TCGA-A8-A06Z-01A	alive	1.03	7.7			TCGA-FD-A5BZ-01A	dead	27.83	5.9
TCGA-A8-A0A9-01A	alive	27.4	7.7			TCGA-SY-A9G0-01A	dead	33.6	5.9
TCGA-B6-A0RP-01A	dead	104.2	7.7			TCGA-DK-AA6M-01A	alive	52.73	5.8
TCGA-OL-A66J-01A	alive	66.53	7.7			TCGA-GV-A3QH-01A	dead	8.6	5.8
TCGA-BH-A18G-01A	alive	4.97	7.7			TCGA-ZF-AA4X-01A	alive	68.13	5.8
TCGA-BH-A0HB-01A	alive	26.87	7.7			TCGA-CF-A1HS-01A	alive	12.73	5.8
TCGA-A2-A04T-01A	alive	74.87	7.7			TCGA-GU-AATQ-01A	dead	7.1	5.8
TCGA-BH-A0AY-01A	alive	25.9	7.7			TCGA-GV-A3QI-01A	alive	37	5.8
TCGA-AC-A3W7-01A	alive	15.7	7.7			TCGA-FJ-A3Z7-01A	alive	31.5	5.8
TCGA-BH-A0B5-01A	alive	71.2	7.7			TCGA-2F-A9KP-01A	dead	12.13	5.8
TCGA-AN-A0XT-01A	alive	0.33	7.7			TCGA-GC-A3RC-01A	alive	16.13	5.7
TCGA-AC-A3EH-01A	dead	6.57	7.7			TCGA-BT-A3PK-01A	dead	10.1	5.7
TCGA-B6-A0I9-01A	dead	12.07	7.7			TCGA-FD-A62S-01A	dead	13.53	5.7
TCGA-B6-A0X7-01A	dead	59.37	7.7			TCGA-FJ-A3ZE-01A	dead	10.8	5.7
TCGA-A8-A08B-01A	alive	38.53	7.6			TCGA-BT-A20R-01A	dead	5.13	5.7
TCGA-A8-A09N-01A	alive	1.03	7.6			TCGA-FD-A3SR-01A	dead	20.07	5.7
TCGA-BH-A0HA-01A	alive	53.7	7.6			TCGA-DK-AA6R-01A	alive	168.03	5.7
TCGA-E9-A1RA-01A	alive	45.63	7.6			TCGA-DK-A1AD-01A	alive	114	5.7
TCGA-AN-A0FN-01A	alive	7.27	7.6			TCGA-K4-A54R-01A	alive	28.07	5.6
TCGA-LL-A8F5-01A	alive	19.87	7.6			TCGA-XF-AAN7-01A	dead	18.83	5.6
TCGA-BH-A0DG-01A	alive	68.03	7.6			TCGA-DK-A1A7-01A	alive	18.67	5.6
TCGA-EW-A1OY-01A	alive	30.27	7.6			TCGA-DK-A1AB-01A	dead	16.93	5.6
TCGA-GM-A2DN-01A	alive	103.03	7.6			TCGA-GU-A42P-01A	dead	11.07	5.6
TCGA-E9-A5UP-01A	alive	26.77	7.6			TCGA-E7-A97P-01A	dead	14.57	5.5
TCGA-BH-A5IZ-01A	alive	18.9	7.6			TCGA-DK-A6B1-01A	alive	68.3	5.5
TCGA-AC-A7VC-01A	alive	0.03	7.6			TCGA-GC-A3BM-01A	dead	21.7	5.5
TCGA-AC-A2FO-01A	alive	75.17	7.6			TCGA-BT-A20U-01A	dead	15.17	5.5
TCGA-E9-A22H-01A	alive	41.07	7.6			TCGA-KQ-A41S-01A	alive	1.17	5.5
TCGA-E2-A14N-01A	alive	47.8	7.6			TCGA-DK-AA6S-01A	alive	168.33	5.5
TCGA-D8-A1JM-01A	alive	19.67	7.6			TCGA-FD-A6TE-01A	alive	12.53	5.5
TCGA-AR-A5QP-01A	alive	39.5	7.6			TCGA-GV-A3QF-01A	dead	20.57	5.5
TCGA-A7-A26E-01B	alive	31.8	7.6			TCGA-DK-A2HX-01A	dead	47.33	5.5
TCGA-BH-A0AZ-01A	alive	63.97	7.6			TCGA-BL-A0C8-01A	alive	40.63	5.4
TCGA-E2-A9RU-01A	alive	17.93	7.6			TCGA-E7-A3X6-01A	dead	30.13	5.4
TCGA-B6-A0IN-01A	dead	85.77	7.6			TCGA-XF-A8HE-01A	alive	127.23	5.4
TCGA-B6-A0IC-01A	dead	51.4	7.6			TCGA-CU-A3QU-01A	alive	5.27	5.4
TCGA-A8-A06Y-01A	alive	26.37	7.5			TCGA-ZF-AA4R-01A	dead	34.53	5.4
TCGA-BH-A0B6-01A	alive	82.77	7.5			TCGA-ZF-A9RM-01A	alive	48.5	5.3
TCGA-BH-A1FG-01A	dead	124.53	7.5			TCGA-DK-A3IQ-01A	dead	17.97	5.3
TCGA-E2-A14U-01A	alive	43.93	7.5			TCGA-DK-AA76-01A	alive	12.2	5.2
TCGA-B6-A40B-01A	alive	105.07	7.5			TCGA-E5-A2PC-01A	alive	44.2	5.2
TCGA-AR-A1AP-01A	alive	95.2	7.5			TCGA-GD-A3OP-01A	alive	2.13	5.1
TCGA-E2-A1IJ-01A	alive	28.83	7.5			TCGA-ZF-A9R2-01A	alive	21.4	5
TCGA-LD-A9QF-01A	alive	10.77	7.5			TCGA-DK-A6B6-01A	alive	37.17	5
TCGA-LL-A441-01A	alive	33.2	7.5			TCGA-E7-A8O7-01A	alive	15.53	4.9
TCGA-AN-A0FF-01A	alive	5.73	7.5			TCGA-LT-A5Z6-01A	alive	15.8	4.9
TCGA-B6-A0I2-01A	alive	145.37	7.5			TCGA-4Z-AA7Q-01A	dead	17	4.9
TCGA-EW-A1OX-01A	alive	30.37	7.5			TCGA-GV-A3JX-01A	alive	19.37	4.9
TCGA-E9-A2JT-01A	alive	9.6	7.5			TCGA-ZF-AA4U-01A	dead	8.73	4.9
TCGA-AO-A12B-01A	alive	99.63	7.5			TCGA-C4-A0F6-01A	alive	23.33	4.8
TCGA-OL-A5RU-01A	alive	40.63	7.5			TCGA-FD-A3N6-01A	alive	28.37	4.8
TCGA-BH-A1ES-01A	dead	115.4	7.5			TCGA-C4-A0F1-01A	alive	2.97	4.7
TCGA-AC-A3HN-01A	alive	16.53	7.5			TCGA-G2-A3VY-01A	alive	17.87	4.7
TCGA-E2-A1LI-01A	alive	104.03	7.5			TCGA-FD-A3B5-01A	dead	9.07	4.7
TCGA-C8-A135-01A	alive	13.1	7.5			TCGA-XF-A8HC-01A	dead	6.67	4.7
TCGA-E9-A1NH-01A	alive	19.2	7.5			TCGA-GC-A3WC-01A	alive	18	4.6
TCGA-3C-AALI-01A	alive	133.5	7.5			TCGA-CU-A3KJ-01A	alive	18.73	4.6
TCGA-AC-A4ZE-01A	alive	29.67	7.5			TCGA-E5-A4TZ-01A	dead	15.57	4.6
TCGA-AN-A0XN-01A	alive	0.33	7.5			TCGA-2F-A9KR-01A	dead	106.1	4.5
TCGA-A2-A1G6-01A	alive	16.7	7.5			TCGA-MV-A51V-01A	alive	13.67	4.4
TCGA-B6-A0IQ-01A	alive	142.83	7.5			TCGA-DK-A3WX-01A	dead	10.7	4.3
TCGA-LD-A74U-01A	alive	13.4	7.5			TCGA-DK-A2I6-01A	alive	88.53	4.3
TCGA-C8-A1HO-01A	alive	12.5	7.5			TCGA-XF-AAN2-01A	dead	62.3	4.1
TCGA-A2-A4RY-01A	alive	21.6	7.5			TCGA-FD-A3N5-01A	dead	22.83	4.1
TCGA-B6-A0IB-01A	dead	131.37	7.5			TCGA-XF-AAMX-01A	dead	6.87	4.1
TCGA-D8-A147-01A	alive	19.47	7.4			TCGA-GV-A3JW-01A	alive	21.63	4
TCGA-A8-A093-01A	alive	18.2	7.4			TCGA-FT-A61P-01A	alive	11.23	4
TCGA-BH-A0HF-01A	alive	24.23	7.4			TCGA-G2-A2EK-01A	alive	16.17	3.5
TCGA-BH-A0HI-01A	alive	20.67	7.4
TCGA-BH-A0W5-01A	alive	42.93	7.4
TCGA-OL-A5DA-01A	alive	59.43	7.4
TCGA-E9-A24A-01A	alive	24.9	7.4
TCGA-E2-A14R-01A	alive	39.13	7.4
TCGA-D8-A1XO-01A	alive	56.07	7.4
TCGA-S3-AA15-01A	alive	17.5	7.4
TCGA-E2-A14V-01A	alive	34.73	7.4
TCGA-AR-A1AS-01A	alive	38.33	7.4
TCGA-AC-A2FG-01A	alive	61.77	7.4
TCGA-A7-A13H-01A	alive	29.97	7.4
TCGA-E9-A22E-01A	alive	42.3	7.4
TCGA-A2-A3XS-01A	dead	34.4	7.4
TCGA-AR-A0TT-01A	alive	110.53	7.4
TCGA-A2-A0CK-01A	alive	138.63	7.4
TCGA-B6-A1KN-01A	alive	141.1	7.4
TCGA-PL-A8LZ-01A	alive	10.07	7.4
TCGA-E2-A15A-01A	alive	23.67	7.4
TCGA-A2-A25D-01A	alive	18.4	7.4
TCGA-B6-A3ZX-01A	dead	38.4	7.4
TCGA-A8-A09B-01A	alive	12.17	7.3
TCGA-C8-A273-01A	alive	17.1	7.3
TCGA-A2-A0D3-01A	alive	62.43	7.3
TCGA-A7-A3J1-01A	alive	11.43	7.3
TCGA-E9-A54X-01A	alive	24.23	7.3
TCGA-5L-AAT0-01A	alive	49.23	7.3
TCGA-AN-A046-01A	alive	0.33	7.3
TCGA-E2-A14W-01A	alive	32.47	7.3
TCGA-BH-A18V-01A	dead	51.87	7.3
TCGA-AO-A12C-01A	alive	79.07	7.3
TCGA-BH-A0C7-01B	alive	92.23	7.3
TCGA-AR-A1AH-01A	alive	126.9	7.3
TCGA-AO-A03N-01B	alive	67.7	7.3
TCGA-OL-A5RV-01A	alive	35.4	7.3
TCGA-A8-A085-01A	alive	37.47	7.2
TCGA-B6-A402-01A	alive	71.13	7.2
TCGA-AR-A1AK-01A	alive	105.3	7.2
TCGA-BH-A209-01A	dead	131.97	7.2
TCGA-BH-A0B8-01A	alive	52.3	7.2
TCGA-E2-A1IU-01A	alive	11.23	7.2
TCGA-OL-A5RX-01A	alive	29.27	7.2
TCGA-GM-A2DM-01A	alive	107.53	7.2
TCGA-AO-A12H-01A	alive	41.13	7.2
TCGA-BH-A1EY-01A	dead	17.93	7.2
TCGA-AC-A6IW-01A	alive	13.77	7.2
TCGA-B6-A0RS-01A	dead	102.1	7.2
TCGA-D8-A27V-01A	alive	12.7	7.2
TCGA-A1-A0SD-01A	alive	14.57	7.2
TCGA-E2-A15H-01A	alive	13.1	7.2
TCGA-C8-A275-01A	alive	0.03	7.2
TCGA-E9-A22A-01A	alive	39.63	7.2
TCGA-AR-A5QM-01A	alive	74.37	7.2
TCGA-BH-A0HL-01A	alive	2.4	7.2
TCGA-AC-A8OQ-01A	alive	1.13	7.2
TCGA-EW-A1P0-01A	alive	41.7	7.2
TCGA-B6-A1KF-01A	alive	102.93	7.2
TCGA-B6-A0WY-01A	dead	115.37	7.2
TCGA-BH-A0E2-01A	alive	14.5	7.2
TCGA-AO-A0JE-01A	alive	77.83	7.2
TCGA-AR-A2LJ-01A	alive	87.73	7.2
TCGA-EW-A2FR-01A	alive	55.77	7.2
TCGA-A8-A0A1-01A	alive	12.17	7.1
TCGA-A8-A07W-01A	alive	10.13	7.1
TCGA-A8-A08G-01A	alive	20.23	7.1
TCGA-OK-A5Q2-01A	alive	2.13	7.1
TCGA-BH-A0W7-01A	alive	45.43	7.1
TCGA-BH-A0BR-01A	alive	77.67	7.1
TCGA-LL-A740-01A	alive	14.7	7.1
TCGA-A7-A0DC-01B	alive	30.2	7.1
TCGA-E2-A14Y-01A	alive	70.3	7.1
TCGA-E9-A1QZ-01A	alive	25.17	7.1
TCGA-A2-A0ST-01A	alive	100.57	7.1
TCGA-AN-A0XU-01A	alive	0.33	7.1
TCGA-A7-A0DB-01A	alive	33.57	7.1
TCGA-A7-A3IZ-01A	alive	10.73	7.1
TCGA-A7-A0D9-01A	alive	37.97	7.1
TCGA-E2-A109-01A	alive	47.23	7.1
TCGA-A7-A0CG-01A	alive	34.77	7.1
TCGA-A2-A0T5-01A	alive	17.7	7.1
TCGA-D8-A1XY-01A	alive	16.77	7.1
TCGA-AC-A62Y-01A	alive	17.67	7.1
TCGA-E9-A245-01A	dead	0.87	7.1
TCGA-C8-A8HR-01A	alive	13.6	7.1
TCGA-C8-A131-01A	alive	13.7	7.1
TCGA-B6-A0WX-01A	dead	21.3	7.1
TCGA-A2-A4RW-01A	alive	7.4	7.1
TCGA-A8-A08A-01A	alive	1	7
TCGA-BH-A0B0-01A	alive	82.57	7
TCGA-BH-A0H5-01A	alive	54	7
TCGA-D8-A1XA-01A	alive	27.97	7
TCGA-A2-A04R-01A	alive	123.63	7
TCGA-E2-A158-01A	alive	15	7
TCGA-A2-A0T4-01A	alive	20.8	7
TCGA-E2-A10A-01A	alive	40.97	7
TCGA-EW-A6SD-01A	alive	33.67	7
TCGA-AN-A041-01A	alive	0.23	7
TCGA-BH-A0BV-01A	alive	50.63	7
TCGA-AN-A0XV-01A	alive	5.4	7
TCGA-D8-A27W-01A	alive	12.43	7
TCGA-EW-A2FV-01A	alive	26.27	7
TCGA-A8-A09T-01A	alive	19.3	6.9
TCGA-A8-A06P-01A	alive	13.2	6.9
TCGA-A8-A0A6-01A	alive	21.33	6.9
TCGA-A8-A06U-01A	dead	29.43	6.9
TCGA-B6-A1KI-01A	alive	74.53	6.9
TCGA-BH-A0BG-01A	alive	62.37	6.9
TCGA-C8-A26X-01A	alive	12.53	6.9
TCGA-E2-A1IL-01A	alive	3.93	6.9
TCGA-AC-A8OS-01A	alive	2.33	6.9
TCGA-D8-A1JE-01A	alive	19.17	6.9
TCGA-A2-A25A-01A	alive	109.2	6.9
TCGA-E2-A15M-01A	dead	11.2	6.9
TCGA-E9-A228-01A	alive	42.83	6.9
TCGA-EW-A1J5-01A	alive	15.9	6.9
TCGA-BH-A0E1-01A	alive	15.9	6.9
TCGA-EW-A1J1-01A	alive	19.17	6.9
TCGA-BH-A0DZ-01A	alive	16.5	6.9
TCGA-BH-AB28-01A	alive	9.57	6.9
TCGA-A2-A0YH-01A	alive	21.97	6.9
TCGA-BH-A1FD-01A	dead	33.63	6.8
TCGA-A2-A0SX-01A	alive	51.13	6.8
TCGA-BH-A0EA-01A	dead	33.03	6.8
TCGA-AQ-A04L-01B	alive	131.9	6.8
TCGA-BH-A0DP-01A	alive	15.87	6.8
TCGA-A2-A25B-01A	alive	43.03	6.8
TCGA-BH-A0BJ-01A	alive	22	6.8
TCGA-E2-A56Z-01A	alive	8.4	6.8
TCGA-A2-A0EX-01A	alive	25.07	6.8
TCGA-XX-A899-01A	alive	15.57	6.8
TCGA-EW-A1PB-01A	alive	20.27	6.8
TCGA-A2-A4S2-01A	alive	21.43	6.8
TCGA-C8-A8HP-01A	alive	13.2	6.8
TCGA-A8-A095-01A	alive	42.57	6.7
TCGA-A8-A07P-01A	alive	11.13	6.7
TCGA-A8-A08T-01A	dead	113.63	6.7
TCGA-A2-A0YF-01A	alive	51.17	6.7
TCGA-BH-A0H3-01A	alive	64.27	6.7
TCGA-E9-A229-01A	alive	38.27	6.7
TCGA-A2-A0EO-01A	alive	81.4	6.7
TCGA-BH-A0HW-01A	alive	52.03	6.7
TCGA-E9-A1R5-01A	alive	3.07	6.7
TCGA-C8-A12V-01A	alive	12.83	6.7
TCGA-BH-A1F0-01A	dead	26.17	6.7
TCGA-BH-A1FC-01A	dead	115.73	6.7
TCGA-D8-A1XT-01A	alive	16.87	6.7
TCGA-EW-A1OZ-01A	alive	40.97	6.7
TCGA-E9-A1NG-01A	dead	26.2	6.7
TCGA-B6-A2IU-01A	alive	172.53	6.7
TCGA-AN-A0G0-01A	alive	0.53	6.7
TCGA-BH-A0DL-01A	alive	79.37	6.7
TCGA-D8-A27K-01A	alive	48.7	6.7
TCGA-A2-A3KC-01A	alive	36.73	6.7
TCGA-BH-A0E9-01B	alive	82.97	6.7
TCGA-AC-A2FM-01A	dead	26.4	6.7
TCGA-AR-A0TQ-01A	alive	99.7	6.7
TCGA-AC-A2QI-01A	alive	19.6	6.7
TCGA-BH-A18J-01A	dead	20.4	6.7
TCGA-B6-A0WS-01A	dead	98.83	6.7
TCGA-C8-A1HI-01A	alive	11.43	6.6
TCGA-A8-A0A7-01A	alive	1	6.6
TCGA-A2-A0EV-01A	alive	32.27	6.6
TCGA-D8-A27P-01A	alive	1.63	6.6
TCGA-3C-AALK-01A	alive	48.27	6.6
TCGA-A2-A0ER-01A	alive	75.43	6.6
TCGA-BH-A0DK-01A	alive	14.1	6.6
TCGA-E2-A15D-01A	alive	17.53	6.6
TCGA-A1-A0SN-01A	alive	39.87	6.6
TCGA-D8-A1JT-01A	alive	13.5	6.6
TCGA-AO-A12E-01A	alive	71.4	6.6
TCGA-A2-A3XY-01A	dead	36.43	6.6
TCGA-EW-A3U0-01A	alive	17.73	6.6
TCGA-B6-A400-01A	alive	7.17	6.6
TCGA-AN-A0XS-01A	alive	0.33	6.6
TCGA-AO-A0JL-01A	alive	56.1	6.6
TCGA-A8-A07J-01A	alive	12.17	6.5
TCGA-A8-A08L-01A	dead	10.13	6.5
TCGA-E2-A15C-01A	alive	23.13	6.5
TCGA-EW-A1IY-01A	alive	8.6	6.5
TCGA-BH-A1ET-01A	dead	84	6.5
TCGA-A2-A0YI-01A	alive	50.17	6.5
TCGA-AO-A0J4-01A	alive	52.9	6.5
TCGA-E9-A1RB-01A	dead	32.53	6.5
TCGA-D8-A27H-01A	alive	13.23	6.5
TCGA-A2-A0CT-01A	alive	76.3	6.5
TCGA-AR-A24K-01A	alive	51.6	6.5
TCGA-A2-A4S0-01A	alive	23.53	6.5
TCGA-A7-A13G-01B	alive	23.93	6.5
TCGA-AR-A1AO-01A	alive	87.27	6.5
TCGA-C8-A1HM-01A	alive	12.5	6.5
TCGA-C8-A12U-01A	alive	12.83	6.5
TCGA-BH-A8G0-01A	alive	22.07	6.5
TCGA-XX-A89A-01A	alive	16.27	6.5
TCGA-B6-A0IH-01A	dead	113.93	6.5
TCGA-B6-A0RT-01A	alive	90.7	6.5
TCGA-AN-A0XP-01A	alive	0.3	6.5
TCGA-AN-A04A-01A	alive	3	6.5
TCGA-EW-A1J2-01A	alive	13.43	6.4
TCGA-A8-A084-01A	alive	15.27	6.4
TCGA-BH-A0DO-01B	alive	54.8	6.4
TCGA-E2-A152-01A	alive	70.93	6.4
TCGA-E2-A15O-01A	alive	51.5	6.4
TCGA-D8-A4Z1-01A	alive	21.97	6.4
TCGA-AC-A8OP-01A	alive	20.47	6.4
TCGA-AR-A24X-01A	alive	100.13	6.4
TCGA-A7-A26I-01B	alive	22.03	6.4
TCGA-GM-A2DC-01A	alive	84.5	6.4
TCGA-C8-A12O-01A	alive	12.83	6.4
TCGA-E2-A10F-01A	alive	29.27	6.4
TCGA-E9-A248-01A	alive	1.97	6.4
TCGA-BH-A18F-01A	alive	33.37	6.4
TCGA-A2-A0D2-01A	alive	34.23	6.4
TCGA-OL-A5RW-01A	alive	36.87	6.4
TCGA-BH-A0B3-01A	alive	40.1	6.4
TCGA-AC-A3OD-01B	alive	15.03	6.4
TCGA-AR-A0TR-01A	dead	5.33	6.4
TCGA-A1-A0SI-01A	alive	21.17	6.4
TCGA-A2-A0YC-01A	alive	33	6.4
TCGA-B6-A0RQ-01A	dead	142.23	6.4
TCGA-AR-A1AV-01A	alive	62.13	6.4
TCGA-AO-A0JJ-01A	alive	62.9	6.4
TCGA-BH-A0BF-01A	dead	44.13	6.4
TCGA-AR-A24M-01A	alive	122	6.4
TCGA-A7-A13F-01A	alive	25.5	6.4
TCGA-AC-A3W6-01A	alive	20.07	6.4
TCGA-A2-A0T1-01A	alive	17.37	6.4
TCGA-A8-A06O-01A	alive	13.2	6.3
TCGA-A8-A09A-01A	alive	10.13	6.3
TCGA-AR-A252-01A	alive	94.6	6.3
TCGA-A2-A0EP-01A	alive	120.1	6.3
TCGA-A2-A04N-01A	alive	145.13	6.3
TCGA-AC-A8OR-01A	alive	1.33	6.3
TCGA-BH-A0H0-01A	alive	15.37	6.3
TCGA-BH-A0DE-01A	alive	79.07	6.3
TCGA-E2-A10E-01A	alive	28.83	6.3
TCGA-B6-A0IJ-01A	alive	236.87	6.3
TCGA-A1-A0SG-01A	alive	14.47	6.3
TCGA-AC-A23E-01A	alive	23.27	6.3
TCGA-3C-AALJ-01A	alive	49.13	6.3
TCGA-S3-A6ZG-01A	alive	18.73	6.3
TCGA-BH-A0DI-01A	alive	30.4	6.3
TCGA-EW-A1P6-01A	alive	18.73	6.3
TCGA-A1-A0SQ-01A	alive	18.47	6.3
TCGA-AC-A6IV-01A	alive	18.93	6.3
TCGA-A2-A0YL-01A	alive	49.13	6.3
TCGA-D8-A1Y0-01A	alive	15.73	6.3
TCGA-AR-A24O-01A	alive	120.23	6.3
TCGA-E2-A14P-01A	alive	41.53	6.3
TCGA-E9-A1R3-01A	alive	2.6	6.3
TCGA-BH-A0BA-01A	alive	37.73	6.3
TCGA-A8-A07C-01A	alive	34.47	6.2
TCGA-D8-A1JP-01A	alive	21.3	6.2
TCGA-OL-A6VR-01A	alive	40.67	6.2
TCGA-BH-A8FZ-01A	alive	19.13	6.2
TCGA-BH-A0AU-01A	alive	63.8	6.2
TCGA-B6-A0I1-01A	dead	78.7	6.2
TCGA-E2-A15I-01A	alive	56.4	6.2
TCGA-AN-A0XL-01A	alive	5.43	6.2
TCGA-A2-A25F-01A	alive	10.73	6.2
TCGA-AN-A0AK-01A	alive	7.47	6.2
TCGA-E2-A15L-01A	alive	20.87	6.2
TCGA-C8-A134-01A	alive	12.77	6.2
TCGA-BH-A18T-01A	dead	7.47	6.2
TCGA-AR-A2LN-01A	alive	38.7	6.2
TCGA-E2-A159-01A	alive	25.4	6.2
TCGA-BH-A0DQ-01A	alive	3.27	6.2
TCGA-E2-A153-01A	alive	23.57	6.2
TCGA-B6-A0X5-01A	dead	69.9	6.2
TCGA-BH-A0B4-01A	alive	39.7	6.2
TCGA-PE-A5DC-01A	dead	47.67	6.2
TCGA-AC-A2FE-01A	dead	87.87	6.2
TCGA-AO-A0J5-01A	dead	26.4	6.2
TCGA-A8-A08S-01A	alive	33.47	6.1
TCGA-BH-A0AV-01A	alive	60.67	6.1
TCGA-A1-A0SE-01A	alive	44.03	6.1
TCGA-EW-A1J6-01A	alive	29.17	6.1
TCGA-A7-A6VX-01A	alive	10.57	6.1
TCGA-A2-A1FZ-01A	alive	22.77	6.1
TCGA-BH-A0EI-01A	alive	64.2	6.1
TCGA-D8-A1J8-01A	alive	14.37	6.1
TCGA-BH-A0E7-01A	alive	45.43	6.1
TCGA-C8-A12Z-01A	alive	12.73	6.1
TCGA-BH-A0BZ-01A	alive	75.17	6.1
TCGA-BH-A0HP-01A	alive	13.8	6.1
TCGA-BH-A0DV-01A	alive	68.8	6.1
TCGA-D8-A27T-01A	alive	13.27	6.1
TCGA-E9-A3Q9-01A	alive	33.37	6.1
TCGA-AR-A0TX-01A	alive	65.73	6
TCGA-A8-A09M-01A	alive	33.53	6
TCGA-A8-A08X-01A	alive	43.6	6
TCGA-AR-A255-01A	alive	72.03	6
TCGA-E2-A1IN-01A	alive	22.5	6
TCGA-E2-A156-01A	alive	24.2	6
TCGA-S3-AA14-01A	alive	17.63	6
TCGA-D8-A146-01A	alive	21.43	6
TCGA-EW-A1IX-01A	alive	40.27	6
TCGA-BH-A18I-01A	alive	36.43	6
TCGA-A2-A0EN-01A	alive	90.6	6
TCGA-AC-A3W5-01A	alive	16.8	6
TCGA-D8-A27G-01A	alive	13.63	6
TCGA-A2-A0CO-01A	dead	116.4	6
TCGA-E2-A1LB-01A	alive	76.87	6
TCGA-B6-A1KC-01B	alive	44.2	6
TCGA-D8-A140-01A	alive	13.43	6
TCGA-AR-A2LL-01A	alive	67.07	6
TCGA-BH-A0HK-01A	alive	5.93	6
TCGA-AC-A5EH-01A	alive	17.03	6
TCGA-AR-A24R-01A	alive	114.33	6
TCGA-A8-A09V-01A	alive	15.23	5.9
TCGA-AC-A2FF-01A	alive	91.97	5.9
TCGA-BH-A0H6-01A	alive	24.9	5.9
TCGA-E2-A154-01A	alive	19.7	5.9
TCGA-AR-A24S-01A	alive	99.2	5.9
TCGA-AR-A2LE-01A	alive	168.73	5.9
TCGA-BH-A0HN-01A	alive	17.2	5.9
TCGA-E9-A1R4-01A	alive	6.2	5.9
TCGA-OL-A5D6-01A	dead	36.8	5.9
TCGA-D8-A1X7-01A	alive	16.97	5.9
TCGA-AN-A0AT-01A	alive	0.33	5.9
TCGA-A7-A5ZW-01A	alive	10.87	5.9
TCGA-AC-A2FB-01A	alive	41.13	5.9
TCGA-AN-A03X-01A	alive	0.33	5.9
TCGA-AO-A03O-01A	dead	82.77	5.9
TCGA-E9-A1N9-01A	alive	36.7	5.9
TCGA-C8-A8HQ-01A	alive	12.67	5.9
TCGA-A2-A0EY-01A	alive	64.17	5.9
TCGA-S3-AA0Z-01A	alive	20.97	5.9
TCGA-BH-A1EV-01A	dead	12.17	5.9
TCGA-BH-A1FR-01A	dead	54.73	5.9
TCGA-A2-A0YT-01A	dead	24.1	5.9
TCGA-BH-A28O-01A	alive	37.33	5.9
TCGA-AC-A3YI-01A	alive	23.57	5.9
TCGA-AO-A03M-01B	alive	62.2	5.8
TCGA-AR-A24N-01A	alive	101.17	5.8
TCGA-D8-A1JU-01A	alive	14.9	5.8
TCGA-BH-A18H-01A	alive	21.73	5.8
TCGA-BH-A0HQ-01A	alive	37.37	5.8
TCGA-C8-A1HN-01A	alive	13.13	5.8
TCGA-D8-A1JK-01A	alive	20.4	5.8
TCGA-BH-A1F5-01A	dead	90.4	5.8
TCGA-D8-A1XQ-01A	alive	16.63	5.8
TCGA-EW-A1PE-01A	alive	10.67	5.8
TCGA-AC-A2QH-01B	alive	33.5	5.8
TCGA-AC-A2B8-01A	alive	22.57	5.8
TCGA-B6-A0RV-01A	alive	171.87	5.8
TCGA-E9-A1N4-01A	alive	33.33	5.8
TCGA-AN-A0FW-01A	alive	0.37	5.8
TCGA-D8-A1X8-01A	alive	26.1	5.8
TCGA-AN-A0XO-01A	alive	12.5	5.8
TCGA-AQ-A7U7-01A	dead	19.47	5.8
TCGA-A2-A0YG-01A	alive	22.2	5.8
TCGA-A8-A0A4-01A	alive	13.2	5.7
TCGA-D8-A141-01A	alive	20.87	5.7
TCGA-JL-A3YW-01A	alive	12	5.7
TCGA-A8-A086-01A	alive	13.2	5.7
TCGA-AR-A1AJ-01A	alive	102.4	5.7
TCGA-A2-A0YK-01A	alive	19.6	5.7
TCGA-A1-A0SM-01A	alive	8.07	5.7
TCGA-S3-AA10-01A	alive	19.53	5.7
TCGA-BH-A0HX-01A	alive	27.63	5.7
TCGA-A7-A4SA-01A	alive	15.13	5.7
TCGA-A2-A0YD-01A	alive	25.63	5.7
TCGA-BH-A1EX-01A	dead	50.27	5.7
TCGA-AN-A0FZ-01A	alive	0.33	5.7
TCGA-AN-A0AS-01A	alive	0.33	5.7
TCGA-A2-A1FX-01A	alive	61.57	5.7
TCGA-E9-A1RF-01A	alive	6.67	5.7
TCGA-B6-A0IE-01A	dead	66.43	5.7
TCGA-AR-A1AL-01A	alive	99.03	5.7
TCGA-A2-A0SY-01A	alive	44.9	5.7
TCGA-BH-A1F8-01A	dead	25.43	5.7
TCGA-AC-A2QJ-01A	dead	14.87	5.7
TCGA-B6-A0RI-01A	alive	237.53	5.7
TCGA-E2-A1BC-01A	alive	16.7	5.6
TCGA-A8-A08R-01A	alive	1	5.6
TCGA-A8-A0A2-01A	alive	19.3	5.6
TCGA-BH-A1F6-01A	dead	98.83	5.6
TCGA-BH-A0WA-01A	alive	23.37	5.6
TCGA-GM-A2DK-01A	alive	88.17	5.6
TCGA-D8-A1XM-01A	alive	17.93	5.6
TCGA-D8-A27E-01A	alive	17.67	5.6
TCGA-A2-A0EU-01A	alive	34.77	5.6
TCGA-AO-A0JF-01A	alive	66	5.6
TCGA-BH-A0GY-01A	alive	30.77	5.6
TCGA-C8-A26Y-01A	alive	13.13	5.6
TCGA-E2-A15E-01A	alive	21	5.6
TCGA-OL-A66I-01A	alive	23.8	5.6
TCGA-E9-A3QA-01A	alive	30.6	5.6
TCGA-BH-A0BD-01A	alive	18.47	5.6
TCGA-A2-A0CX-01A	alive	57.6	5.6
TCGA-E2-A1B1-01A	alive	88.43	5.6
TCGA-AR-A24V-01A	alive	106.77	5.6
TCGA-AO-A0J7-01A	alive	20.6	5.6
TCGA-E2-A10B-01A	alive	38.03	5.6
TCGA-C8-A12Q-01A	dead	12.83	5.6
TCGA-D8-A1XG-01A	alive	14.93	5.6
TCGA-AN-A0AL-01A	alive	7.57	5.6
TCGA-D8-A1XS-01A	alive	16.53	5.6
TCGA-A8-A08I-01A	alive	12.17	5.5
TCGA-A8-A06X-01A	dead	31.43	5.5
TCGA-BH-A0C3-01A	alive	90.3	5.5
TCGA-AO-A1KS-01A	alive	11.67	5.5
TCGA-BH-A1EW-01A	dead	56.47	5.5
TCGA-E9-A1R0-01A	alive	28.67	5.5
TCGA-E9-A1R6-01A	alive	11.3	5.5
TCGA-D8-A1JL-01A	alive	20.37	5.5
TCGA-B6-A0RG-01A	alive	69.4	5.5
TCGA-AR-A0TS-01A	alive	85.27	5.5
TCGA-D8-A1JB-01A	alive	56.27	5.5
TCGA-EW-A1PG-01A	alive	35.03	5.5
TCGA-AO-A03T-01A	alive	70.8	5.5
TCGA-A2-A0CL-01A	alive	100.5	5.5
TCGA-E2-A1B0-01A	alive	54.37	5.5
TCGA-D8-A27L-01A	alive	16.63	5.5
TCGA-E9-A1RE-01A	alive	47.3	5.5
TCGA-BH-A1FM-01A	dead	46.27	5.5
TCGA-B6-A0I8-01A	dead	24.97	5.5
TCGA-A8-A08C-01A	alive	29.37	5.4
TCGA-A8-A07F-01A	alive	19.23	5.4
TCGA-D8-A1JA-01A	alive	16.73	5.4
TCGA-A8-A076-01A	alive	54.73	5.4
TCGA-HN-A2OB-01A	dead	63.33	5.4
TCGA-GM-A2DI-01A	alive	86.33	5.4
TCGA-BH-A18P-01A	dead	30.7	5.4
TCGA-AR-A1AX-01A	alive	87.63	5.4
TCGA-E9-A247-01A	alive	39.53	5.4
TCGA-D8-A1J9-01A	alive	17.73	5.4
TCGA-LL-A440-01A	alive	25.3	5.4
TCGA-A2-A0T7-01A	alive	21.03	5.4
TCGA-EW-A6SC-01A	alive	31.73	5.4
TCGA-AR-A250-01A	alive	90.23	5.4
TCGA-AR-A24Z-01A	alive	100.03	5.4
TCGA-AR-A24H-01A	alive	163.13	5.4
TCGA-D8-A145-01A	alive	13.67	5.4
TCGA-D8-A1JD-01A	alive	18.4	5.4
TCGA-E2-A155-01A	alive	21.33	5.4
TCGA-EW-A1IW-01A	alive	12.37	5.4
TCGA-A7-A6VY-01A	alive	8.87	5.4
TCGA-BH-A1FE-01A	dead	75.77	5.4
TCGA-OL-A97C-01A	alive	9.03	5.4
TCGA-A2-A1G0-01A	alive	20.53	5.4
TCGA-4H-AAAK-01A	alive	11.6	5.4
TCGA-AQ-A0Y5-01A	dead	5.73	5.4
TCGA-E9-A1N3-01A	alive	35.3	5.4
TCGA-AQ-A1H3-01A	alive	32.97	5.4
TCGA-A2-A0EW-01A	dead	62.8	5.4
TCGA-AR-A5QN-01A	alive	33.77	5.4
TCGA-E2-A3DX-01A	alive	44.17	5.4
TCGA-A8-A09K-01A	alive	30.4	5.3
TCGA-A8-A07G-01A	alive	19.23	5.3
TCGA-A8-A08F-01A	alive	33.47	5.3
TCGA-A1-A0SP-01A	alive	19.47	5.3
TCGA-A8-A09X-01A	dead	14.2	5.3
TCGA-AR-A24P-01A	alive	2.8	5.3
TCGA-LL-A73Y-01A	alive	15.9	5.3
TCGA-EW-A1PF-01A	alive	14.63	5.3
TCGA-A7-A26G-01A	alive	24.07	5.3
TCGA-E9-A1NF-01A	dead	35.73	5.3
TCGA-AQ-A04J-01A	alive	27.3	5.3
TCGA-BH-A6R9-01A	alive	5.33	5.3
TCGA-BH-A0DD-01A	alive	82.87	5.3
TCGA-BH-A18M-01A	dead	73.57	5.3
TCGA-A2-A1G4-01A	alive	19.83	5.3
TCGA-AR-A24T-01A	alive	106.73	5.3
TCGA-S3-A6ZH-01A	alive	21.37	5.3
TCGA-E9-A1RC-01A	alive	40.8	5.3
TCGA-B6-A0RM-01A	dead	79.1	5.3
TCGA-AR-A0TZ-01A	dead	108.73	5.2
TCGA-AN-A0FY-01A	alive	0.33	5.2
TCGA-B6-A0RU-01A	alive	286.83	5.2
TCGA-D8-A13Y-01A	alive	57.6	5.2
TCGA-AR-A2LM-01A	alive	64.5	5.2
TCGA-AC-A23G-01A	alive	74.93	5.2
TCGA-BH-A0W4-01A	alive	25.3	5.2
TCGA-BH-A18N-01A	dead	38.27	5.2
TCGA-BH-A0H9-01A	alive	41.57	5.2
TCGA-EW-A6S9-01A	alive	15.43	5.2
TCGA-E2-A15T-01A	alive	52.1	5.2
TCGA-A2-A3XT-01A	alive	92.33	5.2
TCGA-E9-A1N5-01A	alive	37.33	5.2
TCGA-E9-A1ND-01A	alive	42.2	5.2
TCGA-E9-A1N6-01A	dead	22.6	5.2
TCGA-AC-A2FK-01A	alive	88.33	5.2
TCGA-PL-A8LX-01A	alive	0.17	5.2
TCGA-A8-A08Z-01A	alive	40.57	5.1
TCGA-B6-A0X1-01A	dead	248.5	5.1
TCGA-BH-A0BP-01A	dead	76.53	5.1
TCGA-BH-A0BL-01A	alive	75.93	5.1
TCGA-BH-A1FU-01A	dead	56.27	5.1
TCGA-A7-A26F-01B	alive	24.6	5.1
TCGA-E2-A14T-01A	alive	77.03	5.1
TCGA-EW-A1OW-01A	alive	23.13	5.1
TCGA-A2-A0D1-01A	alive	35.03	5.1
TCGA-EW-A1PD-01A	alive	14.13	5.1
TCGA-LL-A442-01A	alive	29.63	5.1
TCGA-AR-A0U4-01A	alive	108.7	5.1
TCGA-A7-A26H-01A	alive	24.13	5.1
TCGA-A1-A0SK-01A	dead	32.23	5.1
TCGA-A2-A0ES-01A	alive	73	5.1
TCGA-A2-A0SU-01A	alive	55.4	5.1
TCGA-A2-A04W-01A	alive	103.4	5.1
TCGA-C8-A132-01A	alive	12.77	5.1
TCGA-E9-A2JS-01A	dead	30.13	5.1
TCGA-BH-A208-01A	dead	58.63	5.1
TCGA-GI-A2C9-01A	alive	111.4	5.1
TCGA-C8-A26W-01A	alive	12.7	5.1
TCGA-A2-A0T6-01A	alive	19.17	5.1
TCGA-AO-A0JD-01A	alive	73	5.1
TCGA-AO-A0JB-01A	alive	51.4	5.1
TCGA-A2-A0SV-01A	dead	27.5	5.1
TCGA-A8-A09D-01A	alive	50.73	5
TCGA-BH-A1EU-01A	dead	42.87	5
TCGA-OL-A6VQ-01A	alive	20	5
TCGA-A7-A6VV-01A	alive	10.43	5
TCGA-AR-A1AT-01A	dead	42.4	5
TCGA-A2-A0T0-01A	alive	17.77	5
TCGA-BH-A1FB-01A	dead	122.3	5
TCGA-EW-A1P5-01A	alive	23.43	5
TCGA-C8-A27B-01A	alive	14.63	5
TCGA-BH-A0C1-01B	dead	47.03	5
TCGA-A7-A2KD-01A	alive	22.63	5
TCGA-AR-A1AR-01A	dead	17.47	5
TCGA-D8-A27I-01A	alive	14.63	5
TCGA-C8-A12W-01A	alive	12.83	5
TCGA-GI-A2C8-01A	alive	7.5	5
TCGA-EW-A1P8-01A	dead	7.97	5
TCGA-E9-A1R2-01A	alive	35.43	5
TCGA-A8-A079-01A	alive	9.13	4.9
TCGA-A8-A07E-01A	alive	20.27	4.9
TCGA-E2-A15F-01A	alive	21.93	4.9
TCGA-A1-A0SB-01A	alive	8.63	4.9
TCGA-AO-A0JI-01A	alive	50.93	4.9
TCGA-D8-A142-01A	alive	14.17	4.9
TCGA-E2-A108-01A	alive	27.9	4.9
TCGA-E9-A226-01A	dead	34.93	4.9
TCGA-A8-A07I-01A	alive	14.2	4.8
TCGA-A8-A097-01A	alive	12.17	4.8
TCGA-E2-A1IO-01A	alive	61.83	4.8
TCGA-D8-A1XV-01A	alive	15.37	4.8
TCGA-AR-A2LO-01A	alive	39.93	4.8
TCGA-BH-A0B7-01A	alive	85.3	4.8
TCGA-AC-A23C-01A	alive	19.5	4.8
TCGA-B6-A0IM-01A	dead	129.1	4.8
TCGA-BH-A0EE-01A	alive	31.43	4.8
TCGA-AR-A2LK-01A	dead	54.97	4.8
TCGA-A2-A3KD-01A	alive	40.2	4.8
TCGA-AR-A1AU-01A	alive	95.6	4.8
TCGA-D8-A13Z-01A	alive	21.17	4.7
TCGA-AR-A1AY-01A	alive	34.2	4.7
TCGA-AC-A3QQ-01B	alive	24.47	4.7
TCGA-BH-A201-01A	alive	28.53	4.7
TCGA-AN-A0FV-01A	alive	0.33	4.7
TCGA-A7-A3J0-01A	alive	10.43	4.7
TCGA-A7-A4SE-01A	alive	21.47	4.7
TCGA-E9-A243-01A	alive	20.4	4.7
TCGA-BH-A28Q-01A	alive	37.3	4.7
TCGA-D8-A1XK-01A	alive	14.7	4.7
TCGA-AO-A03P-01A	dead	97.03	4.7
TCGA-A2-A0D4-01A	alive	25.57	4.7
TCGA-E2-A14X-01A	alive	32.4	4.7
TCGA-AR-A0U2-01A	dead	85.03	4.7
TCGA-AN-A0XW-01A	alive	5.67	4.7
TCGA-BH-A0HY-01A	alive	51.5	4.6
TCGA-A7-A0CD-01A	alive	38.83	4.6
TCGA-B6-A0I6-01A	dead	33.03	4.6
TCGA-D8-A1XF-01A	alive	15.43	4.6
TCGA-EW-A1P7-01A	alive	30.5	4.6
TCGA-AN-A0FX-01A	alive	0.33	4.6
TCGA-A7-A13E-01A	dead	20.47	4.6
TCGA-AO-A1KO-01A	alive	20.73	4.6
TCGA-AC-A5XU-01A	alive	15.17	4.6
TCGA-AR-A0TW-01A	alive	100.3	4.6
TCGA-A8-A07B-01A	alive	43.6	4.5
TCGA-A8-A0AB-01A	alive	17.27	4.5
TCGA-A2-A259-01A	alive	53.2	4.5
TCGA-E2-A15P-01A	alive	19.83	4.5
TCGA-A7-A0DA-01A	alive	36.17	4.5
TCGA-S3-AA11-01A	alive	14.03	4.5
TCGA-A2-A0YM-01A	alive	32.17	4.5
TCGA-AR-A24W-01A	alive	33.03	4.5
TCGA-A2-A0YE-01A	alive	18.47	4.5
TCGA-A2-A1FW-01A	alive	17.6	4.5
TCGA-D8-A1JF-01A	alive	12.2	4.5
TCGA-LQ-A4E4-01A	alive	28.3	4.5
TCGA-B6-A0IK-01A	dead	19.03	4.5
TCGA-BH-A0BO-01A	alive	73.23	4.4
TCGA-A2-A0T3-01A	alive	50.53	4.4
TCGA-C8-A12L-01A	alive	12.1	4.4
TCGA-D8-A1JG-01B	alive	53.73	4.4
TCGA-BH-A0B1-01A	alive	38.27	4.4
TCGA-E2-A1IE-01A	alive	78.73	4.4
TCGA-D8-A1XB-01A	alive	18.4	4.4
TCGA-A7-A4SB-01A	alive	13.93	4.4
TCGA-BH-A0H7-01A	alive	23.4	4.4
TCGA-EW-A1P1-01A	alive	40.33	4.4
TCGA-A8-A09Q-01A	alive	25.37	4.3
TCGA-A8-A09R-01A	alive	9.1	4.3
TCGA-A8-A07U-01A	alive	25.33	4.3
TCGA-AR-A2LQ-01A	alive	41.1	4.3
TCGA-D8-A1XZ-01A	alive	15.53	4.3
TCGA-A8-A06Q-01A	alive	1.03	4.2
TCGA-AO-A03U-01B	dead	59.77	4.2
TCGA-D8-A1XU-01A	alive	13.17	4.2
TCGA-C8-A3M8-01A	alive	13.13	4.2
TCGA-AN-A0AM-01A	alive	0.17	4.2
TCGA-E2-A150-01A	alive	64.5	4.2
TCGA-E9-A1NE-01A	alive	36.27	4.2
TCGA-EW-A1PA-01A	alive	19.17	4.2
TCGA-D8-A1XD-01A	alive	17.4	4.2
TCGA-D8-A1XC-01A	dead	12.57	4.2
TCGA-AO-A03V-01A	alive	45.03	4.1
TCGA-AR-A0TP-01A	alive	142.5	4.1
TCGA-E9-A1R7-01A	alive	48.9	4.1
TCGA-B6-A0RL-01A	dead	82.3	4.1
TCGA-AR-A1AN-01A	alive	97.33	4.1
TCGA-AR-A24L-01A	dead	95.53	4.1
TCGA-BH-A18Q-01A	dead	56.4	4.1
TCGA-D8-A1XJ-01A	alive	22.1	4.1
TCGA-AR-A254-01A	alive	86.83	4.1
TCGA-AR-A1AM-01A	alive	99.7	4.1
TCGA-A1-A0SJ-01A	alive	13.87	4.1
TCGA-BH-A1F2-01A	dead	31.97	4.1
TCGA-AO-A0JA-01A	alive	21.83	4.1
TCGA-3C-AAAU-01A	alive	134.9	4.1
TCGA-AO-A12G-01A	alive	54.63	4
TCGA-A2-A1G1-01A	alive	19.47	4
TCGA-D8-A1X5-01A	alive	18.83	4
TCGA-AR-A0TV-01A	alive	76.27	3.9
TCGA-A8-A09E-01A	alive	49.73	3.9
TCGA-D8-A1JH-01A	alive	14.2	3.9
TCGA-E9-A1RH-01A	alive	47.23	3.9
TCGA-A7-A4SC-01A	alive	14.87	3.9
TCGA-E2-A1L7-01A	alive	61.2	3.9
TCGA-BH-A1FH-01A	dead	34.47	3.9
TCGA-D8-A1JI-01A	alive	19.23	3.8
TCGA-AO-A12D-01A	alive	83.83	3.8
TCGA-BH-A1FN-01A	dead	73.07	3.7
TCGA-C8-A12M-01A	alive	11.93	3.7
TCGA-EW-A1P4-01A	alive	30.23	3.7
TCGA-A2-A1FV-01A	alive	23.8	3.7
TCGA-C8-A27A-01A	alive	24.9	3.7
TCGA-A2-A4S1-01A	alive	27.33	3.6
TCGA-A7-A13D-01A	alive	32.17	3.6
TCGA-AR-A24U-01A	alive	104.27	3.6
TCGA-A1-A0SH-01A	alive	47.9	3.6
TCGA-A7-A3RF-01A	alive	13.6	3.6
TCGA-AC-A23H-01A	dead	5.8	3.6
TCGA-AR-A2LR-01A	alive	58.07	3.5
TCGA-D8-A27M-01A	alive	13.67	3.5
TCGA-D8-A1XW-01A	alive	43.63	3.5
TCGA-AC-A62X-01A	alive	13.9	3.5
TCGA-D8-A1JC-01A	alive	16	3.5
TCGA-BH-A0BW-01A	alive	79.03	3.4
TCGA-AO-A0J2-01A	alive	33.23	3.4
TCGA-BH-A1EO-01A	dead	93.27	3.4
TCGA-C8-A26V-01A	alive	20.53	3.4
TCGA-A8-A0AD-01A	alive	38.57	3.3
TCGA-BH-A202-01A	alive	26.5	3.2
TCGA-D8-A27F-01A	alive	16.27	3.2
TCGA-AN-A0FL-01A	alive	7.7	3.2
TCGA-AR-A24Q-01A	alive	105.73	3.2
TCGA-A8-A091-01A	alive	33.47	3.1
TCGA-A2-A4RX-01A	alive	24.73	3.1
TCGA-A2-A0YJ-01A	alive	18.87	3.1
TCGA-A2-A0CU-01A	dead	5.27	3
TCGA-B6-A0WT-01A	alive	191.3	3
TCGA-AQ-A04H-01B	alive	25.13	2.9
TCGA-E2-A1LS-01A	alive	53.47	2.8
TCGA-E2-A1LG-01A	alive	50.77	2.7
TCGA-E2-A15R-01A	alive	57.73	2.5

## Sheet: E
SNU-1272												Caki-2
Concentration (nM)			Vector				EXOSC1-OE					Concentration (nM)			Vector				EXOSC1-OE
0		0.980496	0.963766	1.05574		1.02436	0.943605	1.03203				0		0.933502	1.05407	1.01243		1.04854	0.944007	1.00745
100		0.985632	0.894134	0.970234		0.592268	0.73272	0.625012				100		1.00572	0.930582	0.913696		0.772237	0.809798	0.667965
400		0.786652	0.908882	0.854466		0.282585	0.26726	0.380155				400		0.737905	0.751844	0.850251		0.514354	0.471993	0.393654
600		0.682564	0.555147	0.682289		0.16	0.23	0.26				600		0.552558	0.650637	0.506806		0.342383	0.246859	0.370758
800		0.391893	0.47759	0.510517		0.192287	0.101146	0.246567				800		0.477205	0.395441	0.357354		0.170287	0.264671	0.315043
1000		0.246984	0.418212	0.324805		0.0804038	0.160699	0.208897				1000		0.391353	0.366606	0.232042		0.257867	0.143941	0.168191

## Sheet: F
TUHR14TKB												769-P
Concentration (μM)			Vector				EXOSC1-OE					Concentration (μM)			Vector				EXOSC1-OE
0		0.95	1.1	0.91		1.07	0.89	1.06				0		0.93	1.08	0.99		1.04	0.9	1.06
0.25		0.91	1.08	0.87		0.89	0.86	0.72				0.25		0.89	1.05	0.93		0.84	0.83	0.67
0.5		0.89	0.7	0.85		0.83	0.74	0.64				0.5		0.85	0.71	0.81		0.73	0.71	0.58
1		0.64	0.75	0.8		0.55	0.43	0.62				1		0.61	0.75	0.81		0.41	0.43	0.58
2		0.54	0.71	0.61		0.38	0.24	0.45				2		0.51	0.61	0.68		0.19	0.24	0.35
4		0.52	0.63	0.5		0.25	0.21	0.37				4		0.55	0.49	0.67		0.21	0.18	0.31
SNU-1272												Caki-2
Concentration (μM)			Vector				EXOSC1-OE					Concentration (μM)			Vector				EXOSC1-OE
0		0.93	1.06	1.01		1.07	0.92	1.01				0		0.94	1.08	0.92		1.06	0.91	1.03
0.25		0.95	1.05	0.91		0.81	0.73	0.61				0.25		0.91	1.05	0.87		0.92	0.89	0.78
0.5		0.84	0.97	0.91		0.63	0.7	0.54				0.5		1.03	0.87	0.85		0.85	0.84	0.69
1		0.82	0.91	0.78		0.41	0.32	0.48				1		0.94	0.78	0.86		0.51	0.38	0.61
2		0.7	0.51	0.58		0.15	0.22	0.31				2		0.64	0.78	0.63		0.41	0.21	0.26
4		0.41	0.47	0.57		0.11	0.18	0.27				4		0.62	0.58	0.73		0.25	0.31	0.17
