# Supplementary material for: Exosome component 1 cleaves single-stranded DNA and sensitizes human kidney renal clear cell carcinoma cells to poly(ADP-ribose) polymerase inhibitor
Source: eLife. 2021 Jun 23;10:e69454. doi: 10.7554/eLife.69454 (PMC8260222; doi:10.7554/eLife.69454)
Supplement: Figure 6—source data 1. [file elife-69454-fig6-data1.xlsx]

## Sheet: A
Patient Identifier	Disease Free Status	Disease Free (Months)	z-score-EXOSC1	state（s）	time（s）
TCGA-BP-4766	DiseaseFree	48.03	-1.7918	censored	48.03
TCGA-CZ-5982	DiseaseFree	80.12	-1.6337	censored	80.12
TCGA-B4-5832	DiseaseFree	5.09	-1.6247	censored	5.09
TCGA-A3-3328	DiseaseFree	45.5	-1.5866	censored	45.5
TCGA-B4-5838	DiseaseFree	5.45	-1.5557	censored	5.45
TCGA-A3-3331	DiseaseFree	48.78	-1.5175	censored	48.78
TCGA-B8-4146	DiseaseFree	16.79	-1.5167	censored	16.79
TCGA-B2-3923	DiseaseFree	32.59	-1.4957	censored	32.59
TCGA-CZ-5989	DiseaseFree	62.58	-1.487	censored	62.58
TCGA-BP-4775	DiseaseFree	60.55	-1.4863	censored	60.55
TCGA-CJ-6032	DiseaseFree	119.55	-1.4746	censored	119.55
TCGA-AK-3443	DiseaseFree	46.75	-1.4739	censored	46.75
TCGA-AK-3465	DiseaseFree	12.12	-1.3817	censored	12.12
TCGA-EU-5907	DiseaseFree	4.17	-1.3319	censored	4.17
TCGA-AK-3433	DiseaseFree	111.99	-1.3102	censored	111.99
TCGA-BP-4991	DiseaseFree	46.42	-1.2845	censored	46.42
TCGA-B0-5402	Recurred/Progressed	14.75	-1.2338	deceased	14.75
TCGA-CJ-4639	DiseaseFree	106.08	-1.2208	censored	106.08
TCGA-AK-3461	DiseaseFree	72.83	-1.2026	censored	72.83
TCGA-A3-3320	DiseaseFree	49.54	-1.2012	censored	49.54
TCGA-B0-5110	DiseaseFree	66	-1.2007	censored	66
TCGA-AK-3440	DiseaseFree	94.12	-1.1966	censored	94.12
TCGA-BP-4807	DiseaseFree	6.93	-1.1813	censored	6.93
TCGA-BP-4994	DiseaseFree	42.97	-1.1586	censored	42.97
TCGA-CJ-4878	DiseaseFree	71.81	-1.1564	censored	71.81
TCGA-B0-5703	DiseaseFree	73.78	-1.1426	censored	73.78
TCGA-CW-5583	DiseaseFree	81.77	-1.1353	censored	81.77
TCGA-CJ-4635	DiseaseFree	46.52	-1.134	censored	46.52
TCGA-CJ-4893	DiseaseFree	24.64	-1.1328	censored	24.64
TCGA-A3-3322	DiseaseFree	48.55	-1.1255	censored	48.55
TCGA-A3-3316	DiseaseFree	49.05	-1.1187	censored	49.05
TCGA-A3-3326	DiseaseFree	37.35	-1.1085	censored	37.35
TCGA-DV-5567	Recurred/Progressed	65.83	-1.1037	deceased	65.83
TCGA-AK-3428	DiseaseFree	122.47	-1.1024	censored	122.47
TCGA-EU-5906	DiseaseFree	6.77	-1.0576	censored	6.77
TCGA-DV-A4W0	Recurred/Progressed	65.97	-1.057	deceased	65.97
TCGA-AK-3444	DiseaseFree	48.32	-1.0433	censored	48.32
TCGA-B8-5549	DiseaseFree	6.37	-1.0351	censored	6.37
TCGA-A3-3359	DiseaseFree	82.26	-1.0328	censored	82.26
TCGA-BP-4987	DiseaseFree	36.93	-1.0305	censored	36.93
TCGA-A3-3385	DiseaseFree	65.47	-1.0208	censored	65.47
TCGA-B0-5117	DiseaseFree	52.83	-1.0176	censored	52.83
TCGA-CW-6088	DiseaseFree	105.85	-1.0074	censored	105.85
TCGA-A3-3370	DiseaseFree	74.7	-1.0066	censored	74.7
TCGA-B4-5836	DiseaseFree	4.63	-1.006	censored	4.63
TCGA-B0-5699	Recurred/Progressed	3.09	-1.0012	deceased	3.09
TCGA-BP-4789	DiseaseFree	48.92	-0.998	censored	48.92
TCGA-BP-4330	DiseaseFree	62.02	-0.9941	censored	62.02
TCGA-BP-4995	DiseaseFree	45.04	-0.9922	censored	45.04
TCGA-BP-5200	DiseaseFree	34.92	-0.9843	censored	34.92
TCGA-BP-4342	Recurred/Progressed	7.88	-0.9745	deceased	7.88
TCGA-CJ-4899	DiseaseFree	50.2	-0.9628	censored	50.2
TCGA-B8-5158	DiseaseFree	40.01	-0.9608	censored	40.01
TCGA-EU-5904	DiseaseFree	18.1	-0.9589	censored	18.1
TCGA-A3-3372	DiseaseFree	24.15	-0.9559	censored	24.15
TCGA-BP-4967	DiseaseFree	6.73	-0.9361	censored	6.73
TCGA-BP-4973	DiseaseFree	45.47	-0.9341	censored	45.47
TCGA-BP-4982	DiseaseFree	33.31	-0.9332	censored	33.31
TCGA-CZ-5986	DiseaseFree	12.25	-0.9282	censored	12.25
TCGA-BP-4999	DiseaseFree	41.59	-0.9246	censored	41.59
TCGA-B4-5844	DiseaseFree	0.23	-0.9187	censored	0.23
TCGA-CW-5585	DiseaseFree	85.71	-0.9185	censored	85.71
TCGA-B8-A54F	DiseaseFree	17.05	-0.9161	censored	17.05
TCGA-B2-A4SR	Recurred/Progressed	8.74	-0.913	deceased	8.74
TCGA-B8-5159	DiseaseFree	23.72	-0.8973	censored	23.72
TCGA-A3-3373	DiseaseFree	53.25	-0.8972	censored	53.25
TCGA-B0-5691	Recurred/Progressed	106.77	-0.8955	deceased	106.77
TCGA-CJ-4634	DiseaseFree	114.91	-0.8925	censored	114.91
TCGA-B0-5698	DiseaseFree	119.28	-0.8897	censored	119.28
TCGA-AS-3778	DiseaseFree	1.41	-0.8811	censored	1.41
TCGA-CJ-4904	Recurred/Progressed	9.13	-0.8793	deceased	9.13
TCGA-B8-5553	DiseaseFree	14.29	-0.8791	censored	14.29
TCGA-A3-3351	DiseaseFree	29.89	-0.8787	censored	29.89
TCGA-A3-3323	DiseaseFree	36.33	-0.8774	censored	36.33
TCGA-CJ-4643	DiseaseFree	58.9	-0.874	censored	58.9
TCGA-CJ-4907	DiseaseFree	49.24	-0.8583	censored	49.24
TCGA-BP-4162	DiseaseFree	100.99	-0.8567	censored	100.99
TCGA-B0-4846	Recurred/Progressed	5.35	-0.8561	deceased	5.35
TCGA-A3-3349	DiseaseFree	45.5	-0.8487	censored	45.5
TCGA-A3-3308	DiseaseFree	0.53	-0.8457	censored	0.53
TCGA-BP-4803	DiseaseFree	6.7	-0.8364	censored	6.7
TCGA-T7-A92I	DiseaseFree	11.7	-0.833	censored	11.7
TCGA-B2-4102	DiseaseFree	31.27	-0.8288	censored	31.27
TCGA-BP-4325	DiseaseFree	97.37	-0.8269	censored	97.37
TCGA-BP-5186	DiseaseFree	22.77	-0.8173	censored	22.77
TCGA-B8-4148	DiseaseFree	49.93	-0.816	censored	49.93
TCGA-CZ-4859	DiseaseFree	58.71	-0.8153	censored	58.71
TCGA-A3-3362	DiseaseFree	51.22	-0.8092	censored	51.22
TCGA-DV-5566	DiseaseFree	45.93	-0.7935	censored	45.93
TCGA-BP-4976	DiseaseFree	53.61	-0.7922	censored	53.61
TCGA-AK-3456	DiseaseFree	37.55	-0.7908	censored	37.55
TCGA-B8-5165	DiseaseFree	24.21	-0.7873	censored	24.21
TCGA-BP-5004	DiseaseFree	36.99	-0.7861	censored	36.99
TCGA-BP-4161	Recurred/Progressed	88.21	-0.7854	deceased	88.21
TCGA-BP-4963	DiseaseFree	60.25	-0.7826	censored	60.25
TCGA-CW-6093	DiseaseFree	103.35	-0.7753	censored	103.35
TCGA-CJ-4885	Recurred/Progressed	67.05	-0.7705	deceased	67.05
TCGA-B4-5377	DiseaseFree	11.99	-0.7563	censored	11.99
TCGA-CJ-5686	DiseaseFree	66.95	-0.7449	censored	66.95
TCGA-A3-3307	DiseaseFree	47.17	-0.7432	censored	47.17
TCGA-B0-5119	DiseaseFree	50.99	-0.7423	censored	50.99
TCGA-CJ-4889	DiseaseFree	63.93	-0.7405	censored	63.93
TCGA-BP-4965	DiseaseFree	61.47	-0.7321	censored	61.47
TCGA-B8-5552	DiseaseFree	34.36	-0.732	censored	34.36
TCGA-CJ-4897	Recurred/Progressed	46.75	-0.7297	deceased	46.75
TCGA-BP-4756	DiseaseFree	12.29	-0.7293	censored	12.29
TCGA-CJ-4905	DiseaseFree	49.15	-0.7291	censored	49.15
TCGA-B8-5550	Recurred/Progressed	22.8	-0.7267	deceased	22.8
TCGA-BP-4329	Recurred/Progressed	23	-0.723	deceased	23
TCGA-BP-4961	DiseaseFree	63.57	-0.7227	censored	63.57
TCGA-B0-5120	DiseaseFree	38.4	-0.7196	censored	38.4
TCGA-BP-4972	DiseaseFree	49.34	-0.7189	censored	49.34
TCGA-A3-3357	DiseaseFree	88.3	-0.7183	censored	88.3
TCGA-BP-4970	DiseaseFree	14.22	-0.7084	censored	14.22
TCGA-AK-3454	DiseaseFree	28.71	-0.7072	censored	28.71
TCGA-CZ-4862	DiseaseFree	107.46	-0.7058	censored	107.46
TCGA-B8-A54K	DiseaseFree	15.41	-0.7051	censored	15.41
TCGA-B8-4620	Recurred/Progressed	19.84	-0.702	deceased	19.84
TCGA-CW-5581	DiseaseFree	91.95	-0.6982	censored	91.95
TCGA-A3-A8CQ	DiseaseFree	0.1	-0.6955	censored	0.1
TCGA-A3-3317	Recurred/Progressed	31.27	-0.6934	deceased	31.27
TCGA-BP-4166	DiseaseFree	0.43	-0.6865	censored	0.43
TCGA-B0-5711	Recurred/Progressed	123.72	-0.685	deceased	123.72
TCGA-B2-5636	DiseaseFree	30.19	-0.6847	censored	30.19
TCGA-A3-3378	DiseaseFree	20.7	-0.6729	censored	20.7
TCGA-CZ-5988	DiseaseFree	22.77	-0.6719	censored	22.77
TCGA-B8-A54D	DiseaseFree	27.27	-0.6702	censored	27.27
TCGA-CJ-5680	Recurred/Progressed	5.03	-0.6649	deceased	5.03
TCGA-BP-4332	DiseaseFree	37.22	-0.6633	censored	37.22
TCGA-BP-4769	DiseaseFree	61.63	-0.6453	censored	61.63
TCGA-BP-4760	Recurred/Progressed	47.86	-0.6438	deceased	47.86
TCGA-BP-5198	DiseaseFree	19.81	-0.6434	censored	19.81
TCGA-B4-5378	DiseaseFree	5.75	-0.6416	censored	5.75
TCGA-BP-5194	DiseaseFree	13.4	-0.6342	censored	13.4
TCGA-BP-5180	DiseaseFree	74.34	-0.6342	censored	74.34
TCGA-B0-5713	DiseaseFree	91.39	-0.6309	censored	91.39
TCGA-B8-A8YJ	DiseaseFree	14.16	-0.6301	censored	14.16
TCGA-B4-5834	DiseaseFree	1.25	-0.6299	censored	1.25
TCGA-B8-4622	Recurred/Progressed	40.31	-0.6243	deceased	40.31
TCGA-B2-5633	DiseaseFree	31.64	-0.622	censored	31.64
TCGA-B0-5693	DiseaseFree	133.84	-0.622	censored	133.84
TCGA-BP-4797	DiseaseFree	36.37	-0.6201	censored	36.37
TCGA-BP-4169	Recurred/Progressed	2.56	-0.6146	deceased	2.56
TCGA-BP-4765	DiseaseFree	71.75	-0.6107	censored	71.75
TCGA-CW-5587	Recurred/Progressed	65.8	-0.6097	deceased	65.8
TCGA-B0-4718	Recurred/Progressed	25.23	-0.6089	deceased	25.23
TCGA-B0-5706	DiseaseFree	105.29	-0.6039	censored	105.29
TCGA-CJ-4641	Recurred/Progressed	-11.79	-0.603	deceased	-11.79
TCGA-CJ-4908	DiseaseFree	50.3	-0.5931	censored	50.3
TCGA-A3-3343	DiseaseFree	31.04	-0.5923	censored	31.04
TCGA-B0-5812	DiseaseFree	125.95	-0.5889	censored	125.95
TCGA-BP-4998	DiseaseFree	30.62	-0.5822	censored	30.62
TCGA-B8-5546	DiseaseFree	16.59	-0.5803	censored	16.59
TCGA-DV-5575	DiseaseFree	56.8	-0.5764	censored	56.8
TCGA-A3-A6NN	DiseaseFree	0.1	-0.5753	censored	0.1
TCGA-CJ-4871	Recurred/Progressed	5.55	-0.575	deceased	5.55
TCGA-BP-5008	DiseaseFree	35.18	-0.5735	censored	35.18
TCGA-B0-5113	DiseaseFree	38.6	-0.5625	censored	38.6
TCGA-BP-5184	DiseaseFree	37.22	-0.5543	censored	37.22
TCGA-AK-3445	DiseaseFree	78.58	-0.5525	censored	78.58
TCGA-BP-4774	DiseaseFree	61.93	-0.5392	censored	61.93
TCGA-BP-4975	DiseaseFree	47.08	-0.5371	censored	47.08
TCGA-B2-5635	DiseaseFree	24.8	-0.5321	censored	24.8
TCGA-BP-5181	DiseaseFree	49.11	-0.5291	censored	49.11
TCGA-CJ-4644	Recurred/Progressed	3.06	-0.5288	deceased	3.06
TCGA-B0-5097	Recurred/Progressed	11.79	-0.5281	deceased	11.79
TCGA-BP-4974	Recurred/Progressed	1.15	-0.5239	deceased	1.15
TCGA-B0-5705	Recurred/Progressed	27.66	-0.5238	deceased	27.66
TCGA-B2-4101	DiseaseFree	21.29	-0.5237	censored	21.29
TCGA-B8-5164	DiseaseFree	0.85	-0.5136	censored	0.85
TCGA-CJ-4886	DiseaseFree	64.13	-0.5135	censored	64.13
TCGA-B0-4827	Recurred/Progressed	21.94	-0.5102	deceased	21.94
TCGA-BP-5192	DiseaseFree	23.46	-0.509	censored	23.46
TCGA-B0-5690	DiseaseFree	111.43	-0.5048	censored	111.43
TCGA-BP-5189	Recurred/Progressed	25.66	-0.4919	deceased	25.66
TCGA-BP-4977	DiseaseFree	14.91	-0.4805	censored	14.91
TCGA-BP-4344	DiseaseFree	54.73	-0.4771	censored	54.73
TCGA-B8-A54H	DiseaseFree	8.41	-0.4717	censored	8.41
TCGA-BP-5202	DiseaseFree	0.95	-0.4676	censored	0.95
TCGA-CZ-5451	DiseaseFree	63.37	-0.462	censored	63.37
TCGA-BP-4782	DiseaseFree	11.63	-0.4613	censored	11.63
TCGA-B0-4710	DiseaseFree	57.65	-0.4605	censored	57.65
TCGA-A3-3324	DiseaseFree	38.96	-0.4571	censored	38.96
TCGA-B8-4151	DiseaseFree	42.67	-0.4532	censored	42.67
TCGA-B8-A7U6	DiseaseFree	16.26	-0.4491	censored	16.26
TCGA-CW-5591	DiseaseFree	74.61	-0.4474	censored	74.61
TCGA-A3-3374	DiseaseFree	43.17	-0.4396	censored	43.17
TCGA-A3-A8OW	DiseaseFree	10.61	-0.4365	censored	10.61
TCGA-BP-4801	DiseaseFree	36.93	-0.4336	censored	36.93
TCGA-BP-4768	DiseaseFree	13.14	-0.4324	censored	13.14
TCGA-B0-5695	DiseaseFree	70.63	-0.4271	censored	70.63
TCGA-CZ-5985	DiseaseFree	65.6	-0.4255	censored	65.6
TCGA-CZ-5987	Recurred/Progressed	12.39	-0.4241	deceased	12.39
TCGA-CZ-4853	DiseaseFree	25.43	-0.4161	censored	25.43
TCGA-GK-A6C7	DiseaseFree	2	-0.4143	censored	2
TCGA-AK-3460	DiseaseFree	82.39	-0.4138	censored	82.39
TCGA-B0-5709	DiseaseFree	130.55	-0.4124	censored	130.55
TCGA-DV-5569	DiseaseFree	11.66	-0.4119	censored	11.66
TCGA-A3-3382	Recurred/Progressed	16.89	-0.4096	deceased	16.89
TCGA-CJ-6028	Recurred/Progressed	4.5	-0.4078	deceased	4.5
TCGA-A3-A6NL	DiseaseFree	22.63	-0.4038	censored	22.63
TCGA-BP-4349	DiseaseFree	12.22	-0.3979	censored	12.22
TCGA-A3-3367	DiseaseFree	74.57	-0.3977	censored	74.57
TCGA-CZ-5458	DiseaseFree	91.62	-0.3971	censored	91.62
TCGA-BP-4326	Recurred/Progressed	31.47	-0.3943	deceased	31.47
TCGA-A3-3380	DiseaseFree	18.63	-0.3937	censored	18.63
TCGA-CJ-4874	DiseaseFree	75	-0.3932	censored	75
TCGA-BP-5007	DiseaseFree	37.45	-0.3914	censored	37.45
TCGA-BP-4347	DiseaseFree	44.91	-0.3827	censored	44.91
TCGA-BP-4160	DiseaseFree	94.65	-0.3822	censored	94.65
TCGA-CZ-5461	Recurred/Progressed	1.58	-0.3769	deceased	1.58
TCGA-BP-4964	DiseaseFree	61.17	-0.3736	censored	61.17
TCGA-6D-AA2E	DiseaseFree	11.89	-0.3707	censored	11.89
TCGA-A3-A6NJ	DiseaseFree	15.37	-0.3509	censored	15.37
TCGA-B4-5843	DiseaseFree	0.36	-0.3481	censored	0.36
TCGA-CZ-5456	Recurred/Progressed	31.24	-0.339	deceased	31.24
TCGA-BP-4163	DiseaseFree	93.27	-0.3381	censored	93.27
TCGA-CW-5584	Recurred/Progressed	3.35	-0.3377	deceased	3.35
TCGA-BP-5195	DiseaseFree	24.61	-0.3279	censored	24.61
TCGA-B8-5545	DiseaseFree	50.1	-0.3235	censored	50.1
TCGA-B0-4845	Recurred/Progressed	24.57	-0.3226	deceased	24.57
TCGA-B0-5116	Recurred/Progressed	37.09	-0.3193	deceased	37.09
TCGA-B0-5710	Recurred/Progressed	47.54	-0.3188	deceased	47.54
TCGA-BP-4334	Recurred/Progressed	14.52	-0.318	deceased	14.52
TCGA-B0-5115	Recurred/Progressed	2.46	-0.3172	deceased	2.46
TCGA-A3-3347	Recurred/Progressed	20.04	-0.2922	deceased	20.04
TCGA-CZ-5457	Recurred/Progressed	5.72	-0.2917	deceased	5.72
TCGA-CJ-4868	Recurred/Progressed	1.22	-0.2873	deceased	1.22
TCGA-CZ-5467	Recurred/Progressed	2.04	-0.282	deceased	2.04
TCGA-CW-6097	Recurred/Progressed	15.01	-0.2719	deceased	15.01
TCGA-B0-4837	Recurred/Progressed	39.68	-0.261	deceased	39.68
TCGA-CW-5590	Recurred/Progressed	22.08	-0.2575	deceased	22.08
TCGA-CJ-4894	Recurred/Progressed	5.19	-0.2558	deceased	5.19
TCGA-BP-4771	Recurred/Progressed	3.61	-0.2538	deceased	3.61
TCGA-CJ-4918	Recurred/Progressed	1.08	-0.2399	deceased	1.08
TCGA-BP-4795	DiseaseFree	20.37	-0.2386	censored	20.37
TCGA-BP-4959	DiseaseFree	87.39	-0.2342	censored	87.39
TCGA-AK-3450	DiseaseFree	58.44	-0.233	censored	58.44
TCGA-CZ-4856	DiseaseFree	0.59	-0.2312	censored	0.59
TCGA-CJ-4895	Recurred/Progressed	2	-0.2287	deceased	2
TCGA-B8-5551	DiseaseFree	0.53	-0.2167	censored	0.53
TCGA-B2-5639	Recurred/Progressed	27.96	-0.2137	deceased	27.96
TCGA-A3-A8OX	DiseaseFree	0	-0.2036	censored	0
TCGA-CZ-5463	DiseaseFree	21.75	-0.2025	censored	21.75
TCGA-BP-5006	DiseaseFree	27.6	-0.1984	censored	27.6
TCGA-CW-5589	DiseaseFree	78.12	-0.1982	censored	78.12
TCGA-BP-4969	DiseaseFree	58.94	-0.1922	censored	58.94
TCGA-BP-4174	DiseaseFree	61.73	-0.1894	censored	61.73
TCGA-BP-5187	DiseaseFree	13.34	-0.1881	censored	13.34
TCGA-DV-5565	DiseaseFree	43.66	-0.1866	censored	43.66
TCGA-B8-A54J	DiseaseFree	17.35	-0.1688	censored	17.35
TCGA-B2-5641	DiseaseFree	21.55	-0.1649	censored	21.55
TCGA-CJ-4892	DiseaseFree	49.97	-0.1625	censored	49.97
TCGA-A3-3365	DiseaseFree	28.68	-0.1561	censored	28.68
TCGA-A3-A8OU	DiseaseFree	0	-0.1464	censored	0
TCGA-BP-4158	DiseaseFree	110.94	-0.1433	censored	110.94
TCGA-CJ-5684	DiseaseFree	73.29	-0.1268	censored	73.29
TCGA-BP-4338	Recurred/Progressed	84.49	-0.1267	deceased	84.49
TCGA-CZ-4857	Recurred/Progressed	32.52	-0.1196	deceased	32.52
TCGA-CZ-4863	DiseaseFree	63.34	-0.1182	censored	63.34
TCGA-B2-3924	DiseaseFree	35.87	-0.1162	censored	35.87
TCGA-BP-4781	DiseaseFree	68.33	-0.1155	censored	68.33
TCGA-B0-4848	Recurred/Progressed	16.23	-0.1147	deceased	16.23
TCGA-CJ-4903	DiseaseFree	51.25	-0.1064	censored	51.25
TCGA-A3-3329	DiseaseFree	53.35	-0.1043	censored	53.35
TCGA-CJ-5681	Recurred/Progressed	0.56	-0.1034	deceased	0.56
TCGA-B8-4619	DiseaseFree	17.18	-0.101	censored	17.18
TCGA-BP-5182	DiseaseFree	38.27	-0.1001	censored	38.27
TCGA-DV-5574	Recurred/Progressed	11.73	-0.0925	deceased	11.73
TCGA-B0-5712	Recurred/Progressed	23.82	-0.0912	deceased	23.82
TCGA-A3-3387	DiseaseFree	20.27	-0.0892	censored	20.27
TCGA-BP-4986	DiseaseFree	25.79	-0.0883	censored	25.79
TCGA-CJ-4876	DiseaseFree	64.22	-0.0872	censored	64.22
TCGA-B0-4844	Recurred/Progressed	2.04	-0.0747	deceased	2.04
TCGA-B0-5702	DiseaseFree	71.35	-0.0722	censored	71.35
TCGA-B8-4154	DiseaseFree	45.34	-0.055	censored	45.34
TCGA-BP-4354	Recurred/Progressed	22.5	-0.0463	deceased	22.5
TCGA-B0-4852	Recurred/Progressed	28.25	-0.0417	deceased	28.25
TCGA-B0-5108	DiseaseFree	58.54	-0.0396	censored	58.54
TCGA-B8-A54E	DiseaseFree	29.86	-0.0365	censored	29.86
TCGA-CZ-5460	DiseaseFree	94.38	-0.0279	censored	94.38
TCGA-AK-3434	Recurred/Progressed	53.88	-0.0208	deceased	53.88
TCGA-CJ-4884	DiseaseFree	57.79	-0.0175	censored	57.79
TCGA-CJ-5671	DiseaseFree	130.98	-0.0158	censored	130.98
TCGA-B8-5163	DiseaseFree	27	-0.008	censored	27
TCGA-CJ-5676	Recurred/Progressed	72.9	-0.0069	deceased	72.9
TCGA-CW-5588	DiseaseFree	66.26	-0.0059	censored	66.26
TCGA-B0-4849	Recurred/Progressed	0.13	0.0001	deceased	0.13
TCGA-CJ-4637	Recurred/Progressed	59.82	0.0039	deceased	59.82
TCGA-CJ-5682	Recurred/Progressed	1.81	0.0047	deceased	1.81
TCGA-BP-4784	DiseaseFree	60.91	0.0085	censored	60.91
TCGA-B0-5694	Recurred/Progressed	9.46	0.0101	deceased	9.46
TCGA-CJ-4902	DiseaseFree	49.93	0.0299	censored	49.93
TCGA-EU-5905	DiseaseFree	3.91	0.0479	censored	3.91
TCGA-A3-3319	DiseaseFree	37.12	0.0726	censored	37.12
TCGA-CJ-4882	DiseaseFree	61.86	0.0763	censored	61.86
TCGA-CJ-4901	DiseaseFree	47.63	0.0857	censored	47.63
TCGA-BP-4173	DiseaseFree	62.19	0.0898	censored	62.19
TCGA-CZ-5470	DiseaseFree	12.68	0.0931	censored	12.68
TCGA-BP-4777	DiseaseFree	56.87	0.0933	censored	56.87
TCGA-CZ-5984	DiseaseFree	67.9	0.0934	censored	67.9
TCGA-BP-4345	DiseaseFree	49.8	0.1	censored	49.8
TCGA-CZ-4866	DiseaseFree	107.33	0.1076	censored	107.33
TCGA-A3-A6NI	DiseaseFree	33.44	0.1173	censored	33.44
TCGA-B0-5701	Recurred/Progressed	7.36	0.1238	deceased	7.36
TCGA-BP-4804	Recurred/Progressed	41.72	0.1292	deceased	41.72
TCGA-CJ-4872	DiseaseFree	47.14	0.1416	censored	47.14
TCGA-A3-A8OV	DiseaseFree	11.17	0.1536	censored	11.17
TCGA-B8-4621	DiseaseFree	25.89	0.1605	censored	25.89
TCGA-CW-6090	Recurred/Progressed	91.33	0.1785	deceased	91.33
TCGA-BP-4993	DiseaseFree	5.81	0.1813	censored	5.81
TCGA-BP-4787	Recurred/Progressed	14.49	0.1826	deceased	14.49
TCGA-CZ-5454	Recurred/Progressed	13.9	0.1855	deceased	13.9
TCGA-CJ-4890	Recurred/Progressed	48.52	0.198	deceased	48.52
TCGA-CZ-5466	DiseaseFree	22.5	0.2031	censored	22.5
TCGA-B8-5162	DiseaseFree	1.18	0.2147	censored	1.18
TCGA-BP-4351	Recurred/Progressed	28.68	0.2164	deceased	28.68
TCGA-B0-5102	Recurred/Progressed	89.82	0.2251	deceased	89.82
TCGA-A3-3306	DiseaseFree	36.79	0.2363	censored	36.79
TCGA-BP-5174	DiseaseFree	74.15	0.2432	censored	74.15
TCGA-B0-5080	Recurred/Progressed	3.38	0.2469	deceased	3.38
TCGA-CZ-5464	DiseaseFree	69.91	0.2539	censored	69.91
TCGA-B0-5399	DiseaseFree	46.35	0.2797	censored	46.35
TCGA-BP-4177	DiseaseFree	54.86	0.2965	censored	54.86
TCGA-CJ-5683	DiseaseFree	62.06	0.3003	censored	62.06
TCGA-CJ-4870	DiseaseFree	49.21	0.3038	censored	49.21
TCGA-B0-5697	DiseaseFree	86.4	0.3053	censored	86.4
TCGA-CJ-4887	Recurred/Progressed	10.58	0.3157	deceased	10.58
TCGA-A3-3358	DiseaseFree	42.94	0.3334	censored	42.94
TCGA-CJ-4638	Recurred/Progressed	2.3	0.3443	deceased	2.3
TCGA-BP-5009	Recurred/Progressed	16.16	0.3545	deceased	16.16
TCGA-B8-4153	Recurred/Progressed	7.33	0.3682	deceased	7.33
TCGA-BP-4759	DiseaseFree	77.92	0.3698	censored	77.92
TCGA-A3-3335	Recurred/Progressed	36.07	0.3712	deceased	36.07
TCGA-BP-4983	DiseaseFree	46.42	0.374	censored	46.42
TCGA-BP-5183	Recurred/Progressed	15.93	0.3835	deceased	15.93
TCGA-CJ-4888	Recurred/Progressed	19.97	0.3853	deceased	19.97
TCGA-B0-4818	Recurred/Progressed	4.17	0.4024	deceased	4.17
TCGA-AK-3429	DiseaseFree	109.33	0.4124	censored	109.33
TCGA-B0-5696	Recurred/Progressed	56.73	0.4151	deceased	56.73
TCGA-CJ-6031	DiseaseFree	62.61	0.416	censored	62.61
TCGA-B0-5700	DiseaseFree	58.8	0.4192	censored	58.8
TCGA-BP-4335	Recurred/Progressed	14.91	0.4472	deceased	14.91
TCGA-BP-4971	DiseaseFree	48.85	0.46	censored	48.85
TCGA-A3-3383	DiseaseFree	28.29	0.4683	censored	28.29
TCGA-BP-5001	DiseaseFree	38.67	0.472	censored	38.67
TCGA-BP-4176	DiseaseFree	64.22	0.4763	censored	64.22
TCGA-CZ-4858	Recurred/Progressed	62.81	0.487	deceased	62.81
TCGA-CZ-5459	DiseaseFree	55.29	0.5182	censored	55.29
TCGA-CJ-4636	DiseaseFree	63.21	0.5358	censored	63.21
TCGA-MW-A4EC	DiseaseFree	16.36	0.5618	censored	16.36
TCGA-CJ-4916	DiseaseFree	45.11	0.6032	censored	45.11
TCGA-CJ-5675	Recurred/Progressed	29.57	0.6145	deceased	29.57
TCGA-BP-4960	DiseaseFree	71.35	0.615	censored	71.35
TCGA-BP-5199	DiseaseFree	44.51	0.6496	censored	44.51
TCGA-BP-5196	DiseaseFree	33.44	0.651	censored	33.44
TCGA-BP-5010	Recurred/Progressed	25.66	0.6746	deceased	25.66
TCGA-CJ-4642	DiseaseFree	105.29	0.6765	censored	105.29
TCGA-A3-3346	Recurred/Progressed	3.75	0.6786	deceased	3.75
TCGA-DV-5573	DiseaseFree	37.12	0.6833	censored	37.12
TCGA-B0-5707	DiseaseFree	123	0.6952	censored	123
TCGA-BP-4167	DiseaseFree	89.29	0.6979	censored	89.29
TCGA-CJ-4923	Recurred/Progressed	0.82	0.7002	deceased	0.82
TCGA-BP-4165	Recurred/Progressed	60.38	0.7022	deceased	60.38
TCGA-B0-5094	Recurred/Progressed	2.46	0.7087	deceased	2.46
TCGA-BP-5177	DiseaseFree	9.63	0.7143	censored	9.63
TCGA-AK-3425	DiseaseFree	109.82	0.7194	censored	109.82
TCGA-BP-5201	Recurred/Progressed	-0.62	0.7253	deceased	-0.62
TCGA-B8-A54G	DiseaseFree	1.74	0.7281	censored	1.74
TCGA-B0-5692	DiseaseFree	129.57	0.729	censored	129.57
TCGA-CJ-5679	Recurred/Progressed	19.55	0.7371	deceased	19.55
TCGA-BP-4962	DiseaseFree	58.64	0.7373	censored	58.64
TCGA-DV-5568	DiseaseFree	12.16	0.7491	censored	12.16
TCGA-CJ-4640	DiseaseFree	114.32	0.7749	censored	114.32
TCGA-B0-5081	Recurred/Progressed	7	0.7752	deceased	7
TCGA-BP-4985	Recurred/Progressed	21.58	0.847	deceased	21.58
TCGA-B0-4810	Recurred/Progressed	6.73	0.8479	deceased	6.73
TCGA-BP-4992	DiseaseFree	16.46	0.8673	censored	16.46
TCGA-BP-4989	DiseaseFree	3.88	0.8697	censored	3.88
TCGA-B0-5121	DiseaseFree	48.78	0.8969	censored	48.78
TCGA-AS-3777	DiseaseFree	40.67	0.9155	censored	40.67
TCGA-DV-A4VZ	DiseaseFree	11.99	0.946	censored	11.99
TCGA-MM-A563	DiseaseFree	19.42	0.9476	censored	19.42
TCGA-MM-A84U	DiseaseFree	23	0.9799	censored	23
TCGA-BP-5170	DiseaseFree	79.24	0.9837	censored	79.24
TCGA-CZ-5452	DiseaseFree	58.77	0.9945	censored	58.77
TCGA-BP-4968	DiseaseFree	57.36	1.0108	censored	57.36
TCGA-CJ-4875	Recurred/Progressed	17.44	1.0608	deceased	17.44
TCGA-CJ-6033	Recurred/Progressed	4.73	1.0693	deceased	4.73
TCGA-CJ-4881	Recurred/Progressed	61.79	1.0834	deceased	61.79
TCGA-B0-4811	Recurred/Progressed	15.05	1.0909	deceased	15.05
TCGA-CJ-5677	Recurred/Progressed	9.46	1.1029	deceased	9.46
TCGA-BP-5190	DiseaseFree	33.21	1.1216	censored	33.21
TCGA-B0-4842	Recurred/Progressed	8.21	1.1322	deceased	8.21
TCGA-BP-4343	Recurred/Progressed	61.63	1.1354	deceased	61.63
TCGA-B2-4099	DiseaseFree	31.93	1.1413	censored	31.93
TCGA-B0-5107	Recurred/Progressed	18.04	1.1987	deceased	18.04
TCGA-BP-4799	Recurred/Progressed	11.56	1.2097	deceased	11.56
TCGA-CJ-4912	DiseaseFree	54.43	1.2751	censored	54.43
TCGA-B4-5835	DiseaseFree	0.53	1.2887	censored	0.53
TCGA-AK-3453	DiseaseFree	83.15	1.3026	censored	83.15
TCGA-B0-5400	DiseaseFree	56.93	1.3479	censored	56.93
TCGA-BP-4776	DiseaseFree	13.5	1.3774	censored	13.5
TCGA-BP-5185	Recurred/Progressed	24.18	1.4219	deceased	24.18
TCGA-AK-3458	DiseaseFree	38.37	1.4403	censored	38.37
TCGA-A3-3363	DiseaseFree	10.48	1.4441	censored	10.48
TCGA-B0-4841	Recurred/Progressed	3.55	1.5487	deceased	3.55
TCGA-AK-3451	DiseaseFree	94.22	1.5995	censored	94.22
TCGA-BP-5178	Recurred/Progressed	56.14	1.6077	deceased	56.14
TCGA-CJ-4873	DiseaseFree	74.21	1.6139	censored	74.21
TCGA-BP-4758	DiseaseFree	72.54	1.629	censored	72.54
TCGA-CJ-4869	Recurred/Progressed	57.62	1.6357	deceased	57.62
TCGA-B8-A54I	DiseaseFree	4.93	1.6666	censored	4.93
TCGA-CZ-5469	Recurred/Progressed	3.61	1.6708	deceased	3.61
TCGA-B0-4696	Recurred/Progressed	26.08	1.788	deceased	26.08
TCGA-CJ-5678	Recurred/Progressed	13.11	1.9556	deceased	13.11
TCGA-B0-5100	Recurred/Progressed	46.85	2.0008	deceased	46.85
TCGA-BP-5000	DiseaseFree	18.5	2.0076	censored	18.5
TCGA-MM-A564	DiseaseFree	19.94	2.0099	censored	19.94
TCGA-AK-3436	Recurred/Progressed	39.06	2.0358	deceased	39.06
TCGA-BP-4761	DiseaseFree	5.98	2.0382	censored	5.98
TCGA-BP-4159	Recurred/Progressed	77.27	2.1173	deceased	77.27
TCGA-G6-A8L6	Recurred/Progressed	9.99	2.1319	deceased	9.99
TCGA-BP-4352	Recurred/Progressed	8.71	2.356	deceased	8.71
TCGA-AK-3426	Recurred/Progressed	8.41	2.7709	deceased	8.41
TCGA-B0-5109	Recurred/Progressed	2.3	3.0764	deceased	2.3
TCGA-BP-5169	DiseaseFree	6.34	3.5924	censored	6.34
TCGA-BP-4770	Recurred/Progressed	6.83	3.7007	deceased	6.83
TCGA-BP-5191	DiseaseFree	31.77	4.0746	censored	31.77
TCGA-G6-A8L7	DiseaseFree	70.07	4.5857	censored	70.07
TCGA-AK-3447	DiseaseFree	39.98	4.9103	censored	39.98
TCGA-AK-3427	DiseaseFree	117.71	5.0938	censored	117.71
TCGA-BP-5175	DiseaseFree	30.62	5.8833	censored	30.62
TCGA-B0-5084	Recurred/Progressed	2.14	6.604	deceased	2.14

## Sheet: B
Patient Identifier	Overall Survival Status	Overall Survival (Months)	z-score-EXOSC1	state（s）	time（s）
TCGA-BP-4766	LIVING	48.03	-1.7918	censored	48.03
TCGA-CZ-5982	LIVING	80.12	-1.6337	censored	80.12
TCGA-B4-5832	LIVING	5.09	-1.6247	censored	5.09
TCGA-BP-4164	DECEASED	32.59	-1.5958	deceased	32.59
TCGA-A3-3328	LIVING	45.5	-1.5866	censored	45.5
TCGA-B0-5099	DECEASED	15.93	-1.563	deceased	15.93
TCGA-B4-5838	LIVING	5.45	-1.5557	censored	5.45
TCGA-A3-3331	LIVING	48.78	-1.5175	censored	48.78
TCGA-B8-4146	LIVING	16.79	-1.5167	censored	16.79
TCGA-B2-3923	LIVING	32.59	-1.4957	censored	32.59
TCGA-CZ-5989	LIVING	62.58	-1.487	censored	62.58
TCGA-BP-4775	LIVING	60.55	-1.4863	censored	60.55
TCGA-CJ-6032	LIVING	119.55	-1.4746	censored	119.55
TCGA-AK-3443	LIVING	46.75	-1.4739	censored	46.75
TCGA-AK-3465	LIVING	12.12	-1.3817	censored	12.12
TCGA-EU-5907	LIVING	4.17	-1.3319	censored	4.17
TCGA-AK-3433	LIVING	111.99	-1.3102	censored	111.99
TCGA-BP-4991	LIVING	46.42	-1.2845	censored	46.42
TCGA-B0-5402	LIVING	42.38	-1.2338	censored	42.38
TCGA-CJ-4639	LIVING	106.08	-1.2208	censored	106.08
TCGA-AK-3461	LIVING	72.83	-1.2026	censored	72.83
TCGA-A3-3320	LIVING	49.54	-1.2012	censored	49.54
TCGA-B0-5110	LIVING	66	-1.2007	censored	66
TCGA-AK-3440	LIVING	94.12	-1.1966	censored	94.12
TCGA-BP-4807	LIVING	6.93	-1.1813	censored	6.93
TCGA-BP-4994	LIVING	42.97	-1.1586	censored	42.97
TCGA-CJ-4878	LIVING	71.81	-1.1564	censored	71.81
TCGA-B0-5703	LIVING	73.78	-1.1426	censored	73.78
TCGA-CW-5583	LIVING	81.77	-1.1353	censored	81.77
TCGA-CJ-4635	LIVING	46.52	-1.134	censored	46.52
TCGA-CJ-4893	LIVING	24.64	-1.1328	censored	24.64
TCGA-A3-3322	LIVING	48.55	-1.1255	censored	48.55
TCGA-A3-3316	LIVING	49.05	-1.1187	censored	49.05
TCGA-A3-3326	LIVING	37.35	-1.1085	censored	37.35
TCGA-DV-5567	LIVING	65.83	-1.1037	censored	65.83
TCGA-AK-3428	LIVING	122.47	-1.1024	censored	122.47
TCGA-EU-5906	LIVING	6.77	-1.0576	censored	6.77
TCGA-DV-A4W0	LIVING	81.14	-1.057	censored	81.14
TCGA-AK-3444	LIVING	48.32	-1.0433	censored	48.32
TCGA-B8-5549	LIVING	6.37	-1.0351	censored	6.37
TCGA-A3-3359	LIVING	82.26	-1.0328	censored	82.26
TCGA-BP-4987	LIVING	36.93	-1.0305	censored	36.93
TCGA-A3-3385	LIVING	65.47	-1.0208	censored	65.47
TCGA-B0-5117	LIVING	52.83	-1.0176	censored	52.83
TCGA-CW-6088	LIVING	105.85	-1.0074	censored	105.85
TCGA-A3-3370	LIVING	74.7	-1.0066	censored	74.7
TCGA-B4-5836	LIVING	4.63	-1.006	censored	4.63
TCGA-B0-5699	LIVING	126.18	-1.0012	censored	126.18
TCGA-B0-4836	DECEASED	40.67	-0.998	deceased	40.67
TCGA-BP-4789	LIVING	48.92	-0.998	censored	48.92
TCGA-BP-4330	LIVING	62.02	-0.9941	censored	62.02
TCGA-BP-4995	LIVING	45.04	-0.9922	censored	45.04
TCGA-BP-5200	LIVING	34.92	-0.9843	censored	34.92
TCGA-BP-4342	DECEASED	74.11	-0.9745	deceased	74.11
TCGA-CJ-4899	LIVING	50.2	-0.9628	censored	50.2
TCGA-B8-5158	LIVING	40.01	-0.9608	censored	40.01
TCGA-EU-5904	LIVING	18.1	-0.9589	censored	18.1
TCGA-A3-3372	LIVING	24.15	-0.9559	censored	24.15
TCGA-CW-5580	DECEASED	64.52	-0.9406	deceased	64.52
TCGA-BP-4967	LIVING	6.73	-0.9361	censored	6.73
TCGA-BP-4973	LIVING	45.47	-0.9341	censored	45.47
TCGA-BP-4982	LIVING	33.31	-0.9332	censored	33.31
TCGA-BP-4790	DECEASED	36.5	-0.933	deceased	36.5
TCGA-CZ-5986	LIVING	12.25	-0.9282	censored	12.25
TCGA-BP-4999	LIVING	41.59	-0.9246	censored	41.59
TCGA-B4-5844	LIVING	0.23	-0.9187	censored	0.23
TCGA-CW-5585	LIVING	85.71	-0.9185	censored	85.71
TCGA-B8-A54F	LIVING	17.05	-0.9161	censored	17.05
TCGA-B2-A4SR	LIVING	16.66	-0.913	censored	16.66
TCGA-B8-5159	LIVING	23.72	-0.8973	censored	23.72
TCGA-A3-3373	LIVING	53.25	-0.8972	censored	53.25
TCGA-B0-5691	LIVING	112.71	-0.8955	censored	112.71
TCGA-CJ-4634	LIVING	114.91	-0.8925	censored	114.91
TCGA-B0-5698	LIVING	119.28	-0.8897	censored	119.28
TCGA-AS-3778	LIVING	1.41	-0.8811	censored	1.41
TCGA-CJ-4904	LIVING	108.48	-0.8793	censored	108.48
TCGA-B8-5553	LIVING	14.29	-0.8791	censored	14.29
TCGA-A3-3351	LIVING	29.89	-0.8787	censored	29.89
TCGA-A3-3323	LIVING	36.33	-0.8774	censored	36.33
TCGA-CJ-4643	LIVING	58.9	-0.874	censored	58.9
TCGA-CJ-4907	LIVING	49.24	-0.8583	censored	49.24
TCGA-BP-4162	LIVING	100.99	-0.8567	censored	100.99
TCGA-B0-4846	DECEASED	39.42	-0.8561	deceased	39.42
TCGA-A3-3349	LIVING	45.5	-0.8487	censored	45.5
TCGA-A3-3308	LIVING	0.53	-0.8457	censored	0.53
TCGA-BP-4803	LIVING	6.7	-0.8364	censored	6.7
TCGA-T7-A92I	LIVING	11.7	-0.833	censored	11.7
TCGA-B2-4102	LIVING	31.27	-0.8288	censored	31.27
TCGA-BP-4325	LIVING	97.37	-0.8269	censored	97.37
TCGA-BP-4170	DECEASED	76.97	-0.8232	deceased	76.97
TCGA-BP-5186	LIVING	22.77	-0.8173	censored	22.77
TCGA-B8-4148	LIVING	49.93	-0.816	censored	49.93
TCGA-CZ-4859	LIVING	58.71	-0.8153	censored	58.71
TCGA-A3-3362	LIVING	51.22	-0.8092	censored	51.22
TCGA-B0-5104	DECEASED	90.41	-0.8034	deceased	90.41
TCGA-BP-4327	DECEASED	3.58	-0.796	deceased	3.58
TCGA-DV-5566	LIVING	45.93	-0.7935	censored	45.93
TCGA-BP-4976	LIVING	53.61	-0.7922	censored	53.61
TCGA-AK-3456	LIVING	37.55	-0.7908	censored	37.55
TCGA-B8-5165	LIVING	24.21	-0.7873	censored	24.21
TCGA-BP-5004	LIVING	36.99	-0.7861	censored	36.99
TCGA-BP-4161	LIVING	90.21	-0.7854	censored	90.21
TCGA-BP-4963	LIVING	60.25	-0.7826	censored	60.25
TCGA-CW-6093	LIVING	103.35	-0.7753	censored	103.35
TCGA-CJ-4885	LIVING	113.37	-0.7705	censored	113.37
TCGA-CZ-4854	DECEASED	46.12	-0.7579	deceased	46.12
TCGA-B4-5377	LIVING	11.99	-0.7563	censored	11.99
TCGA-CJ-5686	LIVING	66.95	-0.7449	censored	66.95
TCGA-A3-3307	LIVING	47.17	-0.7432	censored	47.17
TCGA-B0-5119	LIVING	50.99	-0.7423	censored	50.99
TCGA-CJ-4889	LIVING	63.93	-0.7405	censored	63.93
TCGA-BP-4965	LIVING	61.47	-0.7321	censored	61.47
TCGA-B8-5552	LIVING	34.36	-0.732	censored	34.36
TCGA-CJ-4897	LIVING	109.76	-0.7297	censored	109.76
TCGA-BP-4756	LIVING	12.29	-0.7293	censored	12.29
TCGA-CJ-4905	LIVING	49.15	-0.7291	censored	49.15
TCGA-B8-5550	LIVING	48.49	-0.7267	censored	48.49
TCGA-DV-5576	DECEASED	23.88	-0.7242	deceased	23.88
TCGA-BP-4329	DECEASED	27.76	-0.723	deceased	27.76
TCGA-BP-4961	LIVING	63.57	-0.7227	censored	63.57
TCGA-B0-5120	LIVING	38.4	-0.7196	censored	38.4
TCGA-BP-4972	LIVING	49.34	-0.7189	censored	49.34
TCGA-A3-3357	LIVING	88.3	-0.7183	censored	88.3
TCGA-A3-3311	DECEASED	39.13	-0.7132	deceased	39.13
TCGA-BP-4970	LIVING	14.22	-0.7084	censored	14.22
TCGA-AK-3454	LIVING	28.71	-0.7072	censored	28.71
TCGA-CZ-4862	LIVING	107.46	-0.7058	censored	107.46
TCGA-B8-A54K	LIVING	15.41	-0.7051	censored	15.41
TCGA-B8-4620	LIVING	25.53	-0.702	censored	25.53
TCGA-CW-5581	LIVING	91.95	-0.6982	censored	91.95
TCGA-A3-A8CQ	LIVING	0.1	-0.6955	censored	0.1
TCGA-A3-3317	LIVING	48.98	-0.6934	censored	48.98
TCGA-BP-4166	LIVING	0.43	-0.6865	censored	0.43
TCGA-B0-5711	LIVING	131.04	-0.685	censored	131.04
TCGA-B2-5636	LIVING	30.19	-0.6847	censored	30.19
TCGA-A3-3378	LIVING	20.7	-0.6729	censored	20.7
TCGA-CZ-5988	LIVING	22.77	-0.6719	censored	22.77
TCGA-B8-A54D	LIVING	27.27	-0.6702	censored	27.27
TCGA-A3-3325	DECEASED	38.44	-0.6671	deceased	38.44
TCGA-CJ-5680	DECEASED	25.23	-0.6649	deceased	25.23
TCGA-BP-4332	LIVING	37.22	-0.6633	censored	37.22
TCGA-A3-3376	DECEASED	55.72	-0.6584	deceased	55.72
TCGA-B0-4693	DECEASED	2.53	-0.6501	deceased	2.53
TCGA-BP-4769	LIVING	61.63	-0.6453	censored	61.63
TCGA-BP-4760	LIVING	77.56	-0.6438	censored	77.56
TCGA-BP-5198	LIVING	19.81	-0.6434	censored	19.81
TCGA-B4-5378	LIVING	5.75	-0.6416	censored	5.75
TCGA-BP-5180	LIVING	74.34	-0.6342	censored	74.34
TCGA-BP-5194	LIVING	13.4	-0.6342	censored	13.4
TCGA-B0-5713	LIVING	91.39	-0.6309	censored	91.39
TCGA-B8-A8YJ	LIVING	14.16	-0.6301	censored	14.16
TCGA-B4-5834	LIVING	1.25	-0.6299	censored	1.25
TCGA-B8-4622	LIVING	50.1	-0.6243	censored	50.1
TCGA-B0-5693	LIVING	133.84	-0.622	censored	133.84
TCGA-B2-5633	LIVING	31.64	-0.622	censored	31.64
TCGA-BP-4797	LIVING	36.37	-0.6201	censored	36.37
TCGA-BP-4169	DECEASED	23.03	-0.6146	deceased	23.03
TCGA-BP-4765	LIVING	71.75	-0.6107	censored	71.75
TCGA-CW-5587	LIVING	73.13	-0.6097	censored	73.13
TCGA-B0-4718	LIVING	58.41	-0.6089	censored	58.41
TCGA-B0-5706	LIVING	105.29	-0.6039	censored	105.29
TCGA-CJ-4641	DECEASED	54.57	-0.603	deceased	54.57
TCGA-CJ-4908	LIVING	50.3	-0.5931	censored	50.3
TCGA-B0-5083	DECEASED	34.33	-0.5924	deceased	34.33
TCGA-A3-3343	LIVING	31.04	-0.5923	censored	31.04
TCGA-B0-5812	LIVING	125.95	-0.5889	censored	125.95
TCGA-BP-4998	LIVING	30.62	-0.5822	censored	30.62
TCGA-B8-5546	LIVING	16.59	-0.5803	censored	16.59
TCGA-DV-5575	LIVING	56.8	-0.5764	censored	56.8
TCGA-A3-A6NN	LIVING	0.1	-0.5753	censored	0.1
TCGA-CJ-4871	LIVING	79.6	-0.575	censored	79.6
TCGA-BP-5008	LIVING	35.18	-0.5735	censored	35.18
TCGA-B0-5113	LIVING	38.6	-0.5625	censored	38.6
TCGA-BP-5184	LIVING	37.22	-0.5543	censored	37.22
TCGA-AK-3445	LIVING	78.58	-0.5525	censored	78.58
TCGA-BP-4774	LIVING	61.93	-0.5392	censored	61.93
TCGA-BP-4975	LIVING	47.08	-0.5371	censored	47.08
TCGA-B2-5635	LIVING	24.8	-0.5321	censored	24.8
TCGA-BP-5181	LIVING	49.11	-0.5291	censored	49.11
TCGA-CJ-4644	DECEASED	11.04	-0.5288	deceased	11.04
TCGA-B0-5097	LIVING	21.85	-0.5281	censored	21.85
TCGA-BP-4974	DECEASED	6.93	-0.5239	deceased	6.93
TCGA-B0-5705	LIVING	149.05	-0.5238	censored	149.05
TCGA-B2-4101	LIVING	21.29	-0.5237	censored	21.29
TCGA-B8-5164	LIVING	0.85	-0.5136	censored	0.85
TCGA-CJ-4886	LIVING	64.13	-0.5135	censored	64.13
TCGA-A3-3352	DECEASED	18.43	-0.5125	deceased	18.43
TCGA-B0-4827	DECEASED	29.07	-0.5102	deceased	29.07
TCGA-BP-5192	LIVING	23.46	-0.509	censored	23.46
TCGA-B0-5690	LIVING	111.43	-0.5048	censored	111.43
TCGA-CZ-5465	DECEASED	84.23	-0.4976	deceased	84.23
TCGA-BP-5189	DECEASED	27	-0.4919	deceased	27
TCGA-A3-3313	DECEASED	24.15	-0.4839	deceased	24.15
TCGA-CJ-4920	DECEASED	4.57	-0.4806	deceased	4.57
TCGA-BP-4977	LIVING	14.91	-0.4805	censored	14.91
TCGA-BP-4344	LIVING	54.73	-0.4771	censored	54.73
TCGA-B0-4945	DECEASED	70.47	-0.4735	deceased	70.47
TCGA-B8-A54H	LIVING	8.41	-0.4717	censored	8.41
TCGA-BP-5202	LIVING	0.95	-0.4676	censored	0.95
TCGA-CZ-5451	LIVING	63.37	-0.462	censored	63.37
TCGA-BP-4782	LIVING	11.63	-0.4613	censored	11.63
TCGA-B0-4710	LIVING	57.65	-0.4605	censored	57.65
TCGA-BP-4355	DECEASED	31.31	-0.4595	deceased	31.31
TCGA-A3-3324	LIVING	38.96	-0.4571	censored	38.96
TCGA-B8-4151	LIVING	42.67	-0.4532	censored	42.67
TCGA-B8-A7U6	LIVING	16.26	-0.4491	censored	16.26
TCGA-CW-5591	LIVING	74.61	-0.4474	censored	74.61
TCGA-B0-4824	DECEASED	54.43	-0.4407	deceased	54.43
TCGA-A3-3374	LIVING	43.17	-0.4396	censored	43.17
TCGA-A3-A8OW	LIVING	10.61	-0.4365	censored	10.61
TCGA-BP-4346	DECEASED	49.05	-0.4354	deceased	49.05
TCGA-BP-4801	LIVING	36.93	-0.4336	censored	36.93
TCGA-BP-4768	LIVING	13.14	-0.4324	censored	13.14
TCGA-B0-5695	LIVING	70.63	-0.4271	censored	70.63
TCGA-CZ-5985	LIVING	65.6	-0.4255	censored	65.6
TCGA-CZ-5987	DECEASED	14.62	-0.4241	deceased	14.62
TCGA-CZ-4853	LIVING	25.43	-0.4161	censored	25.43
TCGA-GK-A6C7	LIVING	2	-0.4143	censored	2
TCGA-AK-3460	LIVING	82.39	-0.4138	censored	82.39
TCGA-B0-5709	LIVING	130.55	-0.4124	censored	130.55
TCGA-DV-5569	LIVING	11.66	-0.4119	censored	11.66
TCGA-A3-3382	LIVING	18.86	-0.4096	censored	18.86
TCGA-CJ-6028	DECEASED	53.38	-0.4078	deceased	53.38
TCGA-A3-A6NL	LIVING	22.63	-0.4038	censored	22.63
TCGA-BP-4349	LIVING	12.22	-0.3979	censored	12.22
TCGA-A3-3367	LIVING	74.57	-0.3977	censored	74.57
TCGA-CZ-5458	LIVING	91.62	-0.3971	censored	91.62
TCGA-BP-4326	DECEASED	53.38	-0.3943	deceased	53.38
TCGA-A3-3380	LIVING	18.63	-0.3937	censored	18.63
TCGA-CJ-4874	LIVING	75	-0.3932	censored	75
TCGA-BP-5007	LIVING	37.45	-0.3914	censored	37.45
TCGA-B0-4838	DECEASED	27.4	-0.3866	deceased	27.4
TCGA-BP-4347	LIVING	44.91	-0.3827	censored	44.91
TCGA-BP-4160	LIVING	94.65	-0.3822	censored	94.65
TCGA-CZ-5461	DECEASED	10.84	-0.3769	deceased	10.84
TCGA-BP-4340	DECEASED	18.46	-0.3755	deceased	18.46
TCGA-BP-4964	LIVING	61.17	-0.3736	censored	61.17
TCGA-B0-5095	DECEASED	8.05	-0.3718	deceased	8.05
TCGA-6D-AA2E	LIVING	11.89	-0.3707	censored	11.89
TCGA-A3-A6NJ	LIVING	15.37	-0.3509	censored	15.37
TCGA-B4-5843	LIVING	0.36	-0.3481	censored	0.36
TCGA-CZ-5456	LIVING	79.57	-0.339	censored	79.57
TCGA-BP-4163	LIVING	93.27	-0.3381	censored	93.27
TCGA-CW-5584	DECEASED	5.39	-0.3377	deceased	5.39
TCGA-B0-4703	DECEASED	5.98	-0.3343	deceased	5.98
TCGA-BP-5195	LIVING	24.61	-0.3279	censored	24.61
TCGA-B8-5545	LIVING	50.1	-0.3235	censored	50.1
TCGA-B0-4845	DECEASED	65.24	-0.3226	deceased	65.24
TCGA-B0-5116	LIVING	41.85	-0.3193	censored	41.85
TCGA-B0-5710	LIVING	79.83	-0.3188	censored	79.83
TCGA-BP-4334	DECEASED	21.19	-0.318	deceased	21.19
TCGA-B0-5115	LIVING	52.69	-0.3172	censored	52.69
TCGA-B0-5077	DECEASED	43.27	-0.3015	deceased	43.27
TCGA-CZ-5455	DECEASED	18.43	-0.2962	deceased	18.43
TCGA-A3-3347	DECEASED	52.89	-0.2922	deceased	52.89
TCGA-CZ-5457	LIVING	90.47	-0.2917	censored	90.47
TCGA-CJ-4868	DECEASED	21.22	-0.2873	deceased	21.22
TCGA-B0-5096	DECEASED	2.23	-0.2822	deceased	2.23
TCGA-CZ-5467	DECEASED	2.4	-0.282	deceased	2.4
TCGA-CW-6097	DECEASED	18.76	-0.2719	deceased	18.76
TCGA-B0-4694	DECEASED	3.48	-0.2699	deceased	3.48
TCGA-CZ-5453	DECEASED	79.47	-0.2627	deceased	79.47
TCGA-B0-4837	DECEASED	45.27	-0.261	deceased	45.27
TCGA-CW-5590	DECEASED	35.32	-0.2575	deceased	35.32
TCGA-CJ-4894	DECEASED	27.63	-0.2558	deceased	27.63
TCGA-BP-4771	DECEASED	5.32	-0.2538	deceased	5.32
TCGA-CJ-4918	DECEASED	3.06	-0.2399	deceased	3.06
TCGA-BP-4795	LIVING	20.37	-0.2386	censored	20.37
TCGA-BP-4959	LIVING	87.39	-0.2342	censored	87.39
TCGA-AK-3450	LIVING	58.44	-0.233	censored	58.44
TCGA-CZ-4856	LIVING	0.59	-0.2312	censored	0.59
TCGA-CJ-4895	DECEASED	39.42	-0.2287	deceased	39.42
TCGA-B8-5551	LIVING	0.53	-0.2167	censored	0.53
TCGA-B2-5639	DECEASED	32.95	-0.2137	deceased	32.95
TCGA-B0-4688	DECEASED	3.32	-0.2076	deceased	3.32
TCGA-CZ-4861	DECEASED	14.65	-0.2052	deceased	14.65
TCGA-A3-A8OX	LIVING	0	-0.2036	censored	0
TCGA-CZ-5463	LIVING	21.75	-0.2025	censored	21.75
TCGA-BP-5006	LIVING	27.6	-0.1984	censored	27.6
TCGA-CW-5589	LIVING	78.12	-0.1982	censored	78.12
TCGA-BP-4969	LIVING	58.94	-0.1922	censored	58.94
TCGA-BP-4174	LIVING	61.73	-0.1894	censored	61.73
TCGA-BP-5187	LIVING	13.34	-0.1881	censored	13.34
TCGA-DV-5565	LIVING	43.66	-0.1866	censored	43.66
TCGA-B0-4834	DECEASED	68.66	-0.1846	deceased	68.66
TCGA-B0-5075	DECEASED	20.93	-0.1768	deceased	20.93
TCGA-BP-4331	DECEASED	80.62	-0.1742	deceased	80.62
TCGA-B8-A54J	LIVING	17.35	-0.1688	censored	17.35
TCGA-B0-4701	DECEASED	7.82	-0.1665	deceased	7.82
TCGA-B2-5641	LIVING	21.55	-0.1649	censored	21.55
TCGA-CJ-4892	LIVING	49.97	-0.1625	censored	49.97
TCGA-B0-5106	DECEASED	52.5	-0.1576	deceased	52.5
TCGA-A3-3365	LIVING	28.68	-0.1561	censored	28.68
TCGA-A3-A8OU	LIVING	0	-0.1464	censored	0
TCGA-BP-4158	LIVING	110.94	-0.1433	censored	110.94
TCGA-B0-4823	DECEASED	14.91	-0.1274	deceased	14.91
TCGA-CJ-5684	LIVING	73.29	-0.1268	censored	73.29
TCGA-BP-4338	LIVING	93.92	-0.1267	censored	93.92
TCGA-CZ-4857	DECEASED	47.04	-0.1196	deceased	47.04
TCGA-CZ-4863	LIVING	63.34	-0.1182	censored	63.34
TCGA-B2-3924	LIVING	35.87	-0.1162	censored	35.87
TCGA-BP-4781	LIVING	68.33	-0.1155	censored	68.33
TCGA-B0-4848	DECEASED	29.01	-0.1147	deceased	29.01
TCGA-B0-4816	DECEASED	45.04	-0.1064	deceased	45.04
TCGA-CJ-4903	LIVING	51.25	-0.1064	censored	51.25
TCGA-A3-3329	LIVING	53.35	-0.1043	censored	53.35
TCGA-BP-4762	DECEASED	44.12	-0.1037	deceased	44.12
TCGA-CJ-5681	DECEASED	18.13	-0.1034	deceased	18.13
TCGA-B8-4619	LIVING	17.18	-0.101	censored	17.18
TCGA-BP-5182	LIVING	38.27	-0.1001	censored	38.27
TCGA-AK-3431	DECEASED	73.62	-0.0976	deceased	73.62
TCGA-BP-5168	DECEASED	48.06	-0.0961	deceased	48.06
TCGA-DV-5574	LIVING	66.23	-0.0925	censored	66.23
TCGA-B0-5712	LIVING	89.42	-0.0912	censored	89.42
TCGA-A3-3387	LIVING	20.27	-0.0892	censored	20.27
TCGA-BP-4986	LIVING	25.79	-0.0883	censored	25.79
TCGA-CJ-4876	LIVING	64.22	-0.0872	censored	64.22
TCGA-B0-4844	DECEASED	10.28	-0.0747	deceased	10.28
TCGA-B0-5702	LIVING	71.35	-0.0722	censored	71.35
TCGA-B0-4828	DECEASED	10.09	-0.068	deceased	10.09
TCGA-B8-4154	LIVING	45.34	-0.055	censored	45.34
TCGA-BP-4354	DECEASED	33.97	-0.0463	deceased	33.97
TCGA-B0-4852	DECEASED	36.83	-0.0417	deceased	36.83
TCGA-B0-5108	LIVING	58.54	-0.0396	censored	58.54
TCGA-B8-A54E	LIVING	29.86	-0.0365	censored	29.86
TCGA-CZ-5460	LIVING	94.38	-0.0279	censored	94.38
TCGA-AK-3434	LIVING	68.56	-0.0208	censored	68.56
TCGA-CJ-4884	LIVING	57.79	-0.0175	censored	57.79
TCGA-CJ-5671	LIVING	130.98	-0.0158	censored	130.98
TCGA-B8-5163	LIVING	27	-0.008	censored	27
TCGA-CJ-5676	LIVING	133.61	-0.0069	censored	133.61
TCGA-CW-5588	LIVING	66.26	-0.0059	censored	66.26
TCGA-B0-4849	DECEASED	2.27	0.0001	deceased	2.27
TCGA-CZ-4865	DECEASED	5.45	0.0017	deceased	5.45
TCGA-CZ-4864	DECEASED	92.97	0.002	deceased	92.97
TCGA-CJ-4637	DECEASED	73.16	0.0039	deceased	73.16
TCGA-CJ-5682	LIVING	122.73	0.0047	censored	122.73
TCGA-BP-4784	LIVING	60.91	0.0085	censored	60.91
TCGA-B0-5694	DECEASED	15.77	0.0101	deceased	15.77
TCGA-CJ-4902	LIVING	49.93	0.0299	censored	49.93
TCGA-EU-5905	LIVING	3.91	0.0479	censored	3.91
TCGA-BP-4353	DECEASED	12.32	0.0563	deceased	12.32
TCGA-B0-4813	DECEASED	0.59	0.069	deceased	0.59
TCGA-BP-5176	DECEASED	52.23	0.0715	deceased	52.23
TCGA-A3-3319	LIVING	37.12	0.0726	censored	37.12
TCGA-CJ-4882	LIVING	61.86	0.0763	censored	61.86
TCGA-CJ-5689	DECEASED	53.22	0.0791	deceased	53.22
TCGA-CJ-4901	LIVING	47.63	0.0857	censored	47.63
TCGA-BP-4173	LIVING	62.19	0.0898	censored	62.19
TCGA-CZ-5470	LIVING	12.68	0.0931	censored	12.68
TCGA-BP-4777	LIVING	56.87	0.0933	censored	56.87
TCGA-CZ-5984	LIVING	67.9	0.0934	censored	67.9
TCGA-BP-4345	LIVING	49.8	0.1	censored	49.8
TCGA-CZ-4866	LIVING	107.33	0.1076	censored	107.33
TCGA-A3-A6NI	LIVING	33.44	0.1173	censored	33.44
TCGA-BP-4341	DECEASED	52.2	0.1206	deceased	52.2
TCGA-B0-5701	LIVING	80.85	0.1238	censored	80.85
TCGA-BP-4804	LIVING	47.93	0.1292	censored	47.93
TCGA-CJ-4872	LIVING	47.14	0.1416	censored	47.14
TCGA-G6-A8L8	DECEASED	35.84	0.1478	deceased	35.84
TCGA-BP-4988	DECEASED	27.2	0.152	deceased	27.2
TCGA-A3-A8OV	LIVING	11.17	0.1536	censored	11.17
TCGA-B8-4621	LIVING	25.89	0.1605	censored	25.89
TCGA-CW-6090	LIVING	83.84	0.1785	censored	83.84
TCGA-BP-4993	LIVING	5.81	0.1813	censored	5.81
TCGA-BP-4787	DECEASED	15.77	0.1826	deceased	15.77
TCGA-B0-4699	DECEASED	3.61	0.1834	deceased	3.61
TCGA-CZ-5454	DECEASED	23.72	0.1855	deceased	23.72
TCGA-CJ-4890	LIVING	115.6	0.198	censored	115.6
TCGA-CZ-5466	LIVING	22.5	0.2031	censored	22.5
TCGA-B8-5162	LIVING	1.18	0.2147	censored	1.18
TCGA-BP-4351	LIVING	31.87	0.2164	censored	31.87
TCGA-B0-5102	DECEASED	90.8	0.2251	deceased	90.8
TCGA-CJ-5672	DECEASED	71.94	0.2283	deceased	71.94
TCGA-BP-5173	DECEASED	2.04	0.2347	deceased	2.04
TCGA-A3-3306	LIVING	36.79	0.2363	censored	36.79
TCGA-BP-4763	DECEASED	41.72	0.241	deceased	41.72
TCGA-B0-4713	DECEASED	6.64	0.2423	deceased	6.64
TCGA-BP-5174	LIVING	74.15	0.2432	censored	74.15
TCGA-B0-5080	DECEASED	11.24	0.2469	deceased	11.24
TCGA-CJ-6030	DECEASED	75.53	0.2528	deceased	75.53
TCGA-CZ-5464	LIVING	69.91	0.2539	censored	69.91
TCGA-B0-5399	LIVING	46.35	0.2797	censored	46.35
TCGA-B0-5088	DECEASED	18.5	0.2822	deceased	18.5
TCGA-BP-4337	DECEASED	0.07	0.2872	deceased	0.07
TCGA-BP-4177	LIVING	54.86	0.2965	censored	54.86
TCGA-CJ-5683	LIVING	62.06	0.3003	censored	62.06
TCGA-CJ-4870	LIVING	49.21	0.3038	censored	49.21
TCGA-B0-5697	LIVING	86.4	0.3053	censored	86.4
TCGA-B0-4706	DECEASED	2.14	0.3151	deceased	2.14
TCGA-CJ-4887	DECEASED	30.62	0.3157	deceased	30.62
TCGA-CZ-5462	DECEASED	10.22	0.3229	deceased	10.22
TCGA-A3-3358	LIVING	42.94	0.3334	censored	42.94
TCGA-B0-4690	DECEASED	1.41	0.3344	deceased	1.41
TCGA-B0-4707	DECEASED	19.71	0.3344	deceased	19.71
TCGA-CJ-4638	DECEASED	14.16	0.3443	deceased	14.16
TCGA-BP-5009	DECEASED	35.87	0.3545	deceased	35.87
TCGA-B8-4153	LIVING	25.03	0.3682	censored	25.03
TCGA-BP-4759	LIVING	77.92	0.3698	censored	77.92
TCGA-A3-3335	LIVING	61.96	0.3712	censored	61.96
TCGA-BP-4983	LIVING	46.42	0.374	censored	46.42
TCGA-BP-5183	LIVING	42.41	0.3835	censored	42.41
TCGA-CJ-4888	DECEASED	51.48	0.3853	deceased	51.48
TCGA-B0-4814	DECEASED	5.52	0.3938	deceased	5.52
TCGA-B0-4818	DECEASED	16.75	0.4024	deceased	16.75
TCGA-AK-3429	LIVING	109.33	0.4124	censored	109.33
TCGA-B0-5696	LIVING	85.71	0.4151	censored	85.71
TCGA-CJ-6031	LIVING	62.61	0.416	censored	62.61
TCGA-B0-5700	LIVING	58.8	0.4192	censored	58.8
TCGA-B0-4833	DECEASED	78.38	0.4301	deceased	78.38
TCGA-BP-4335	DECEASED	15.6	0.4472	deceased	15.6
TCGA-BP-4971	LIVING	48.85	0.46	censored	48.85
TCGA-A3-3383	LIVING	28.29	0.4683	censored	28.29
TCGA-BP-5001	LIVING	38.67	0.472	censored	38.67
TCGA-B0-4714	DECEASED	3.25	0.4756	deceased	3.25
TCGA-BP-4798	DECEASED	10.97	0.4757	deceased	10.97
TCGA-BP-4176	LIVING	64.22	0.4763	censored	64.22
TCGA-CZ-4858	DECEASED	69.15	0.487	deceased	69.15
TCGA-CW-6087	DECEASED	1.35	0.4963	deceased	1.35
TCGA-CZ-5468	DECEASED	1.94	0.5021	deceased	1.94
TCGA-CZ-5459	LIVING	55.29	0.5182	censored	55.29
TCGA-CJ-4636	LIVING	63.21	0.5358	censored	63.21
TCGA-MW-A4EC	LIVING	16.36	0.5618	censored	16.36
TCGA-B0-5085	DECEASED	25.3	0.59	deceased	25.3
TCGA-B0-4843	DECEASED	10.51	0.5963	deceased	10.51
TCGA-CJ-4916	LIVING	45.11	0.6032	censored	45.11
TCGA-CJ-5675	LIVING	129.3	0.6145	censored	129.3
TCGA-BP-4960	LIVING	71.35	0.615	censored	71.35
TCGA-B0-4817	DECEASED	33.48	0.6269	deceased	33.48
TCGA-BP-5199	LIVING	44.51	0.6496	censored	44.51
TCGA-BP-5196	LIVING	33.44	0.651	censored	33.44
TCGA-BP-5010	DECEASED	28.84	0.6746	deceased	28.84
TCGA-CJ-4642	LIVING	105.29	0.6765	censored	105.29
TCGA-A3-3346	DECEASED	4.5	0.6786	deceased	4.5
TCGA-DV-5573	LIVING	37.12	0.6833	censored	37.12
TCGA-B0-5707	LIVING	123	0.6952	censored	123
TCGA-BP-4167	LIVING	89.29	0.6979	censored	89.29
TCGA-CJ-4923	DECEASED	18.79	0.7002	deceased	18.79
TCGA-BP-4165	LIVING	99.77	0.7022	censored	99.77
TCGA-B0-5094	DECEASED	10.94	0.7087	deceased	10.94
TCGA-BP-5177	LIVING	9.63	0.7143	censored	9.63
TCGA-AK-3425	LIVING	109.82	0.7194	censored	109.82
TCGA-BP-5201	LIVING	31.24	0.7253	censored	31.24
TCGA-B8-A54G	LIVING	1.74	0.7281	censored	1.74
TCGA-B0-5692	LIVING	129.57	0.729	censored	129.57
TCGA-CJ-5679	DECEASED	22.31	0.7371	deceased	22.31
TCGA-BP-4962	LIVING	58.64	0.7373	censored	58.64
TCGA-B0-4819	DECEASED	6.01	0.7418	deceased	6.01
TCGA-B2-4098	DECEASED	1.68	0.7479	deceased	1.68
TCGA-B8-4143	DECEASED	23.29	0.749	deceased	23.29
TCGA-DV-5568	LIVING	12.16	0.7491	censored	12.16
TCGA-CJ-4640	LIVING	114.32	0.7749	censored	114.32
TCGA-B0-5081	DECEASED	11.89	0.7752	deceased	11.89
TCGA-AK-3455	DECEASED	22.44	0.7788	deceased	22.44
TCGA-BP-4985	DECEASED	31.27	0.847	deceased	31.27
TCGA-B0-4810	DECEASED	15.7	0.8479	deceased	15.7
TCGA-BP-4992	LIVING	16.46	0.8673	censored	16.46
TCGA-CZ-4860	DECEASED	6.77	0.8677	deceased	6.77
TCGA-BP-4989	LIVING	3.88	0.8697	censored	3.88
TCGA-B0-5121	LIVING	48.78	0.8969	censored	48.78
TCGA-AS-3777	LIVING	40.67	0.9155	censored	40.67
TCGA-DV-A4VZ	LIVING	11.99	0.946	censored	11.99
TCGA-MM-A563	LIVING	19.42	0.9476	censored	19.42
TCGA-B0-5092	DECEASED	15.08	0.9655	deceased	15.08
TCGA-MM-A84U	LIVING	23	0.9799	censored	23
TCGA-BP-5170	LIVING	79.24	0.9837	censored	79.24
TCGA-CZ-5452	LIVING	58.77	0.9945	censored	58.77
TCGA-BP-4968	LIVING	57.36	1.0108	censored	57.36
TCGA-CJ-4875	DECEASED	116.75	1.0608	deceased	116.75
TCGA-CJ-6033	DECEASED	7.36	1.0693	deceased	7.36
TCGA-CJ-4881	LIVING	66.16	1.0834	censored	66.16
TCGA-B0-4811	DECEASED	46.55	1.0909	deceased	46.55
TCGA-CJ-5677	DECEASED	25.69	1.1029	deceased	25.69
TCGA-BP-5190	LIVING	33.21	1.1216	censored	33.21
TCGA-B0-4842	DECEASED	56.64	1.1322	deceased	56.64
TCGA-BP-4343	DECEASED	62.81	1.1354	deceased	62.81
TCGA-B2-4099	LIVING	31.93	1.1413	censored	31.93
TCGA-B0-4700	DECEASED	65.05	1.1538	deceased	65.05
TCGA-CJ-6027	DECEASED	118.76	1.1842	deceased	118.76
TCGA-B0-5107	DECEASED	30.45	1.1987	deceased	30.45
TCGA-BP-4799	DECEASED	37.22	1.2097	deceased	37.22
TCGA-B0-4815	DECEASED	52.17	1.2132	deceased	52.17
TCGA-CJ-4912	LIVING	54.43	1.2751	censored	54.43
TCGA-B4-5835	LIVING	0.53	1.2887	censored	0.53
TCGA-AK-3453	LIVING	83.15	1.3026	censored	83.15
TCGA-B0-5400	LIVING	56.93	1.3479	censored	56.93
TCGA-BP-4776	LIVING	13.5	1.3774	censored	13.5
TCGA-BP-5185	LIVING	37.19	1.4219	censored	37.19
TCGA-AK-3458	LIVING	38.37	1.4403	censored	38.37
TCGA-A3-3363	LIVING	10.48	1.4441	censored	10.48
TCGA-CJ-4900	DECEASED	56.31	1.4917	deceased	56.31
TCGA-B0-4841	DECEASED	6.7	1.5487	deceased	6.7
TCGA-AK-3451	LIVING	94.22	1.5995	censored	94.22
TCGA-BP-5178	DECEASED	62.81	1.6077	deceased	62.81
TCGA-CJ-4873	LIVING	74.21	1.6139	censored	74.21
TCGA-BP-4758	LIVING	72.54	1.629	censored	72.54
TCGA-CJ-4869	LIVING	83.9	1.6357	censored	83.9
TCGA-B8-A54I	LIVING	4.93	1.6666	censored	4.93
TCGA-CZ-5469	DECEASED	31.08	1.6708	deceased	31.08
TCGA-B0-4839	DECEASED	53.84	1.7572	deceased	53.84
TCGA-B0-4822	DECEASED	36.5	1.7808	deceased	36.5
TCGA-B0-4696	DECEASED	28.45	1.788	deceased	28.45
TCGA-CJ-4891	DECEASED	26.91	1.8862	deceased	26.91
TCGA-B0-4847	DECEASED	26.05	1.9423	deceased	26.05
TCGA-CJ-5678	DECEASED	18.86	1.9556	deceased	18.86
TCGA-DV-A4VX	DECEASED	53.42	1.9747	deceased	53.42
TCGA-B0-5100	DECEASED	62.84	2.0008	deceased	62.84
TCGA-B0-4698	DECEASED	1.38	2.0061	deceased	1.38
TCGA-BP-5000	LIVING	18.5	2.0076	censored	18.5
TCGA-MM-A564	LIVING	19.94	2.0099	censored	19.94
TCGA-AK-3436	LIVING	109.43	2.0358	censored	109.43
TCGA-BP-4761	LIVING	5.98	2.0382	censored	5.98
TCGA-BP-4159	DECEASED	85.45	2.1173	deceased	85.45
TCGA-G6-A8L6	DECEASED	10.28	2.1319	deceased	10.28
TCGA-BP-4981	DECEASED	36.04	2.1552	deceased	36.04
TCGA-B0-4691	DECEASED	4.57	2.2373	deceased	4.57
TCGA-B0-4821	DECEASED	40.41	2.2699	deceased	40.41
TCGA-BP-4352	DECEASED	11.3	2.356	deceased	11.3
TCGA-B0-4697	DECEASED	18.99	2.4535	deceased	18.99
TCGA-B0-4712	DECEASED	43.92	2.7492	deceased	43.92
TCGA-AK-3426	DECEASED	29.07	2.7709	deceased	29.07
TCGA-B0-5109	DECEASED	19.28	3.0764	deceased	19.28
TCGA-G6-A5PC	DECEASED	7.95	3.3366	deceased	7.95
TCGA-BP-5169	LIVING	6.34	3.5924	censored	6.34
TCGA-BP-4770	DECEASED	10.81	3.7007	deceased	10.81
TCGA-B0-5098	DECEASED	52.04	3.7426	deceased	52.04
TCGA-BP-5191	LIVING	31.77	4.0746	censored	31.77
TCGA-G6-A8L7	LIVING	70.07	4.5857	censored	70.07
TCGA-AK-3447	LIVING	39.98	4.9103	censored	39.98
TCGA-AK-3427	LIVING	117.71	5.0938	censored	117.71
TCGA-BP-5175	LIVING	30.62	5.8833	censored	30.62
TCGA-B0-5084	DECEASED	7.29	6.604	deceased	7.29

## Sheet: C
PATIENT_ID	OS_STATUS	OS_MONTHS	EXOSC1 (Z score)	VHL
TCGA-BP-4766	LIVING	48.03	-1.7918	WT
TCGA-CZ-5982	LIVING	80.12	-1.6337	WT
TCGA-A3-3328	LIVING	45.5	-1.5866	WT
TCGA-B0-5099	DECEASED	15.93	-1.563	WT
TCGA-B4-5838	LIVING	5.45	-1.5557	WT
TCGA-B8-4146	LIVING	16.79	-1.5167	WT
TCGA-B2-3923	LIVING	32.59	-1.4957	WT
TCGA-CZ-5989	LIVING	62.58	-1.487	WT
TCGA-BP-4775	LIVING	60.55	-1.4863	WT
TCGA-AK-3443	LIVING	46.75	-1.4739	WT
TCGA-AK-3465	LIVING	12.12	-1.3817	WT
TCGA-EU-5907	LIVING	4.17	-1.3319	WT
TCGA-AK-3433	LIVING	111.99	-1.3102	WT
TCGA-BP-4991	LIVING	46.42	-1.2845	WT
TCGA-CJ-4639	LIVING	106.08	-1.2208	WT
TCGA-AK-3461	LIVING	72.83	-1.2026	WT
TCGA-A3-3320	LIVING	49.54	-1.2012	WT
TCGA-AK-3440	LIVING	94.12	-1.1966	WT
TCGA-BP-4807	LIVING	6.93	-1.1813	WT
TCGA-BP-4994	LIVING	42.97	-1.1586	WT
TCGA-CJ-4878	LIVING	71.81	-1.1564	WT
TCGA-CW-5583	LIVING	81.77	-1.1353	WT
TCGA-CJ-4635	LIVING	46.52	-1.134	WT
TCGA-CJ-4893	LIVING	24.64	-1.1328	WT
TCGA-A3-3322	LIVING	48.55	-1.1255	WT
TCGA-A3-3316	LIVING	49.05	-1.1187	WT
TCGA-A3-3326	LIVING	37.35	-1.1085	WT
TCGA-DV-5567	LIVING	65.83	-1.1037	WT
TCGA-AK-3428	LIVING	122.47	-1.1024	WT
TCGA-DV-A4W0	LIVING	81.14	-1.057	WT
TCGA-A3-3359	LIVING	82.26	-1.0328	WT
TCGA-BP-4987	LIVING	36.93	-1.0305	WT
TCGA-A3-3385	LIVING	65.47	-1.0208	WT
TCGA-B0-5117	LIVING	52.83	-1.0176	WT
TCGA-CW-6088	LIVING	105.85	-1.0074	WT
TCGA-A3-3370	LIVING	74.7	-1.0066	WT
TCGA-B0-5699	LIVING	126.18	-1.0012	WT
TCGA-B0-4836	DECEASED	40.67	-0.998	WT
TCGA-BP-4330	LIVING	62.02	-0.9941	WT
TCGA-BP-5200	LIVING	34.92	-0.9843	WT
TCGA-CJ-4899	LIVING	50.2	-0.9628	WT
TCGA-B8-5158	LIVING	40.01	-0.9608	WT
TCGA-A3-3372	LIVING	24.15	-0.9559	WT
TCGA-BP-4790	DECEASED	36.5	-0.933	WT
TCGA-CZ-5986	LIVING	12.25	-0.9282	WT
TCGA-B4-5844	LIVING	0.23	-0.9187	WT
TCGA-CW-5585	LIVING	85.71	-0.9185	WT
TCGA-B8-A54F	LIVING	17.05	-0.9161	WT
TCGA-B2-A4SR	LIVING	16.66	-0.913	WT
TCGA-B0-5691	LIVING	112.71	-0.8955	WT
TCGA-CJ-4634	LIVING	114.91	-0.8925	WT
TCGA-B0-5698	LIVING	119.28	-0.8897	WT
TCGA-AS-3778	LIVING	1.41	-0.8811	WT
TCGA-CJ-4904	LIVING	108.48	-0.8793	WT
TCGA-B8-5553	LIVING	14.29	-0.8791	WT
TCGA-A3-3351	LIVING	29.89	-0.8787	WT
TCGA-A3-3323	LIVING	36.33	-0.8774	WT
TCGA-CJ-4643	LIVING	58.9	-0.874	WT
TCGA-CJ-4907	LIVING	49.24	-0.8583	WT
TCGA-B0-4846	DECEASED	39.42	-0.8561	WT
TCGA-A3-3349	LIVING	45.5	-0.8487	WT
TCGA-A3-3308	LIVING	0.53	-0.8457	WT
TCGA-BP-4803	LIVING	6.7	-0.8364	WT
TCGA-T7-A92I	LIVING	11.7	-0.833	WT
TCGA-B2-4102	LIVING	31.27	-0.8288	WT
TCGA-BP-4325	LIVING	97.37	-0.8269	WT
TCGA-BP-4170	DECEASED	76.97	-0.8232	WT
TCGA-BP-5186	LIVING	22.77	-0.8173	WT
TCGA-B8-4148	LIVING	49.93	-0.816	WT
TCGA-CZ-4859	LIVING	58.71	-0.8153	WT
TCGA-BP-4327	DECEASED	3.58	-0.796	WT
TCGA-DV-5566	LIVING	45.93	-0.7935	WT
TCGA-BP-4976	LIVING	53.61	-0.7922	WT
TCGA-AK-3456	LIVING	37.55	-0.7908	WT
TCGA-CW-6093	LIVING	103.35	-0.7753	WT
TCGA-CZ-4854	DECEASED	46.12	-0.7579	WT
TCGA-B4-5377	LIVING	11.99	-0.7563	WT
TCGA-CJ-5686	LIVING	66.95	-0.7449	WT
TCGA-A3-3307	LIVING	47.17	-0.7432	WT
TCGA-B0-5119	LIVING	50.99	-0.7423	WT
TCGA-CJ-4889	LIVING	63.93	-0.7405	WT
TCGA-B8-5552	LIVING	34.36	-0.732	WT
TCGA-CJ-4897	LIVING	109.76	-0.7297	WT
TCGA-BP-4756	LIVING	12.29	-0.7293	WT
TCGA-CJ-4905	LIVING	49.15	-0.7291	WT
TCGA-DV-5576	DECEASED	23.88	-0.7242	WT
TCGA-B0-5120	LIVING	38.4	-0.7196	WT
TCGA-BP-4972	LIVING	49.34	-0.7189	WT
TCGA-A3-3357	LIVING	88.3	-0.7183	WT
TCGA-A3-3311	DECEASED	39.13	-0.7132	WT
TCGA-AK-3454	LIVING	28.71	-0.7072	WT
TCGA-CZ-4862	LIVING	107.46	-0.7058	WT
TCGA-B8-A54K	LIVING	15.41	-0.7051	WT
TCGA-B8-4620	LIVING	25.53	-0.702	WT
TCGA-A3-A8CQ	LIVING	0.1	-0.6955	WT
TCGA-A3-3317	LIVING	48.98	-0.6934	WT
TCGA-B0-5711	LIVING	131.04	-0.685	WT
TCGA-B2-5636	LIVING	30.19	-0.6847	WT
TCGA-A3-3378	LIVING	20.7	-0.6729	WT
TCGA-CZ-5988	LIVING	22.77	-0.6719	WT
TCGA-B8-A54D	LIVING	27.27	-0.6702	WT
TCGA-A3-3325	DECEASED	38.44	-0.6671	WT
TCGA-CJ-5680	DECEASED	25.23	-0.6649	WT
TCGA-BP-4332	LIVING	37.22	-0.6633	WT
TCGA-B0-4693	DECEASED	2.53	-0.6501	WT
TCGA-BP-4769	LIVING	61.63	-0.6453	WT
TCGA-BP-4760	LIVING	77.56	-0.6438	WT
TCGA-BP-5198	LIVING	19.81	-0.6434	WT
TCGA-B4-5378	LIVING	5.75	-0.6416	WT
TCGA-BP-5194	LIVING	13.4	-0.6342	WT
TCGA-B8-A8YJ	LIVING	14.16	-0.6301	WT
TCGA-B4-5834	LIVING	1.25	-0.6299	WT
TCGA-B8-4622	LIVING	50.1	-0.6243	WT
TCGA-B2-5633	LIVING	31.64	-0.622	WT
TCGA-B0-5693	LIVING	133.84	-0.622	WT
TCGA-BP-4797	LIVING	36.37	-0.6201	WT
TCGA-BP-4169	DECEASED	23.03	-0.6146	WT
TCGA-CW-5587	LIVING	73.13	-0.6097	WT
TCGA-B0-4718	LIVING	58.41	-0.6089	WT
TCGA-B0-5706	LIVING	105.29	-0.6039	WT
TCGA-CJ-4641	DECEASED	54.57	-0.603	WT
TCGA-CJ-4908	LIVING	50.3	-0.5931	WT
TCGA-B0-5083	DECEASED	34.33	-0.5924	WT
TCGA-A3-3343	LIVING	31.04	-0.5923	WT
TCGA-B8-5546	LIVING	16.59	-0.5803	WT
TCGA-DV-5575	LIVING	56.8	-0.5764	WT
TCGA-A3-A6NN	LIVING	0.1	-0.5753	WT
TCGA-CJ-4871	LIVING	79.6	-0.575	WT
TCGA-BP-5184	LIVING	37.22	-0.5543	WT
TCGA-BP-4774	LIVING	61.93	-0.5392	WT
TCGA-B2-5635	LIVING	24.8	-0.5321	WT
TCGA-BP-5181	LIVING	49.11	-0.5291	WT
TCGA-B2-4101	LIVING	21.29	-0.5237	WT
TCGA-CJ-4886	LIVING	64.13	-0.5135	WT
TCGA-A3-3352	DECEASED	18.43	-0.5125	WT
TCGA-BP-5192	LIVING	23.46	-0.509	WT
TCGA-B0-5690	LIVING	111.43	-0.5048	WT
TCGA-CZ-5465	DECEASED	84.23	-0.4976	WT
TCGA-BP-5189	DECEASED	27	-0.4919	WT
TCGA-A3-3313	DECEASED	24.15	-0.4839	WT
TCGA-BP-4977	LIVING	14.91	-0.4805	WT
TCGA-BP-4344	LIVING	54.73	-0.4771	WT
TCGA-B8-A54H	LIVING	8.41	-0.4717	WT
TCGA-BP-5202	LIVING	0.95	-0.4676	WT
TCGA-CZ-5451	LIVING	63.37	-0.462	WT
TCGA-A3-3324	LIVING	38.96	-0.4571	WT
TCGA-B8-4151	LIVING	42.67	-0.4532	WT
TCGA-B8-A7U6	LIVING	16.26	-0.4491	WT
TCGA-A3-3374	LIVING	43.17	-0.4396	WT
TCGA-A3-A8OW	LIVING	10.61	-0.4365	WT
TCGA-BP-4346	DECEASED	49.05	-0.4354	WT
TCGA-BP-4801	LIVING	36.93	-0.4336	WT
TCGA-BP-4768	LIVING	13.14	-0.4324	WT
TCGA-CZ-5985	LIVING	65.6	-0.4255	WT
TCGA-GK-A6C7	LIVING	2	-0.4143	WT
TCGA-AK-3460	LIVING	82.39	-0.4138	WT
TCGA-B0-5709	LIVING	130.55	-0.4124	WT
TCGA-DV-5569	LIVING	11.66	-0.4119	WT
TCGA-CJ-6028	DECEASED	53.38	-0.4078	WT
TCGA-A3-A6NL	LIVING	22.63	-0.4038	WT
TCGA-A3-3367	LIVING	74.57	-0.3977	WT
TCGA-BP-4326	DECEASED	53.38	-0.3943	WT
TCGA-A3-3380	LIVING	18.63	-0.3937	WT
TCGA-CJ-4874	LIVING	75	-0.3932	WT
TCGA-B0-4838	DECEASED	27.4	-0.3866	WT
TCGA-BP-4347	LIVING	44.91	-0.3827	WT
TCGA-BP-4160	LIVING	94.65	-0.3822	WT
TCGA-CZ-5461	DECEASED	10.84	-0.3769	WT
TCGA-6D-AA2E	LIVING	11.89	-0.3707	WT
TCGA-A3-A6NJ	LIVING	15.37	-0.3509	WT
TCGA-CZ-5456	LIVING	79.57	-0.339	WT
TCGA-BP-4163	LIVING	93.27	-0.3381	WT
TCGA-CW-5584	DECEASED	5.39	-0.3377	WT
TCGA-B8-5545	LIVING	50.1	-0.3235	WT
TCGA-BP-4334	DECEASED	21.19	-0.318	WT
TCGA-B0-5115	LIVING	52.69	-0.3172	WT
TCGA-A3-3347	DECEASED	52.89	-0.2922	WT
TCGA-CJ-4868	DECEASED	21.22	-0.2873	WT
TCGA-CZ-5467	DECEASED	2.4	-0.282	WT
TCGA-CW-6097	DECEASED	18.76	-0.2719	WT
TCGA-B0-4694	DECEASED	3.48	-0.2699	WT
TCGA-CZ-5453	DECEASED	79.47	-0.2627	WT
TCGA-B0-4837	DECEASED	45.27	-0.261	WT
TCGA-CW-5590	DECEASED	35.32	-0.2575	WT
TCGA-BP-4795	LIVING	20.37	-0.2386	WT
TCGA-BP-4959	LIVING	87.39	-0.2342	WT
TCGA-CJ-4895	DECEASED	39.42	-0.2287	WT
TCGA-B2-5639	DECEASED	32.95	-0.2137	WT
TCGA-B0-4688	DECEASED	3.32	-0.2076	WT
TCGA-A3-A8OX	LIVING	0	-0.2036	WT
TCGA-CZ-5463	LIVING	21.75	-0.2025	WT
TCGA-CW-5589	LIVING	78.12	-0.1982	WT
TCGA-BP-4969	LIVING	58.94	-0.1922	WT
TCGA-BP-4174	LIVING	61.73	-0.1894	WT
TCGA-DV-5565	LIVING	43.66	-0.1866	WT
TCGA-B0-4834	DECEASED	68.66	-0.1846	WT
TCGA-B0-5075	DECEASED	20.93	-0.1768	WT
TCGA-BP-4331	DECEASED	80.62	-0.1742	WT
TCGA-B8-A54J	LIVING	17.35	-0.1688	WT
TCGA-B0-4701	DECEASED	7.82	-0.1665	WT
TCGA-B2-5641	LIVING	21.55	-0.1649	WT
TCGA-CJ-4892	LIVING	49.97	-0.1625	WT
TCGA-A3-3365	LIVING	28.68	-0.1561	WT
TCGA-A3-A8OU	LIVING	0	-0.1464	WT
TCGA-BP-4158	LIVING	110.94	-0.1433	WT
TCGA-B0-4823	DECEASED	14.91	-0.1274	WT
TCGA-BP-4338	LIVING	93.92	-0.1267	WT
TCGA-CZ-4857	DECEASED	47.04	-0.1196	WT
TCGA-CZ-4863	LIVING	63.34	-0.1182	WT
TCGA-BP-4781	LIVING	68.33	-0.1155	WT
TCGA-B0-4848	DECEASED	29.01	-0.1147	WT
TCGA-B0-4816	DECEASED	45.04	-0.1064	WT
TCGA-A3-3329	LIVING	53.35	-0.1043	WT
TCGA-CJ-5681	DECEASED	18.13	-0.1034	WT
TCGA-B8-4619	LIVING	17.18	-0.101	WT
TCGA-BP-5182	LIVING	38.27	-0.1001	WT
TCGA-AK-3431	DECEASED	73.62	-0.0976	WT
TCGA-BP-5168	DECEASED	48.06	-0.0961	WT
TCGA-DV-5574	LIVING	66.23	-0.0925	WT
TCGA-B0-5712	LIVING	89.42	-0.0912	WT
TCGA-A3-3387	LIVING	20.27	-0.0892	WT
TCGA-CJ-4876	LIVING	64.22	-0.0872	WT
TCGA-B0-4844	DECEASED	10.28	-0.0747	WT
TCGA-B0-5702	LIVING	71.35	-0.0722	WT
TCGA-BP-4354	DECEASED	33.97	-0.0463	WT
TCGA-B8-A54E	LIVING	29.86	-0.0365	WT
TCGA-AK-3434	LIVING	68.56	-0.0208	WT
TCGA-CJ-5671	LIVING	130.98	-0.0158	WT
TCGA-B0-4849	DECEASED	2.27	0.0001	WT
TCGA-CZ-4865	DECEASED	5.45	0.0017	WT
TCGA-CZ-4864	DECEASED	92.97	0.002	WT
TCGA-CJ-4637	DECEASED	73.16	0.0039	WT
TCGA-CJ-5682	LIVING	122.73	0.0047	WT
TCGA-BP-4784	LIVING	60.91	0.0085	WT
TCGA-B0-5694	DECEASED	15.77	0.0101	WT
TCGA-CJ-4902	LIVING	49.93	0.0299	WT
TCGA-EU-5905	LIVING	3.91	0.0479	WT
TCGA-BP-4353	DECEASED	12.32	0.0563	WT
TCGA-B0-4813	DECEASED	0.59	0.069	WT
TCGA-A3-3319	LIVING	37.12	0.0726	WT
TCGA-CJ-4882	LIVING	61.86	0.0763	WT
TCGA-CJ-5689	DECEASED	53.22	0.0791	WT
TCGA-CJ-4901	LIVING	47.63	0.0857	WT
TCGA-BP-4173	LIVING	62.19	0.0898	WT
TCGA-BP-4777	LIVING	56.87	0.0933	WT
TCGA-CZ-5984	LIVING	67.9	0.0934	WT
TCGA-BP-4345	LIVING	49.8	0.1	WT
TCGA-CZ-4866	LIVING	107.33	0.1076	WT
TCGA-A3-A6NI	LIVING	33.44	0.1173	WT
TCGA-BP-4341	DECEASED	52.2	0.1206	WT
TCGA-B0-5701	LIVING	80.85	0.1238	WT
TCGA-BP-4804	LIVING	47.93	0.1292	WT
TCGA-G6-A8L8	DECEASED	35.84	0.1478	WT
TCGA-A3-A8OV	LIVING	11.17	0.1536	WT
TCGA-CW-6090	LIVING	83.84	0.1785	WT
TCGA-BP-4993	LIVING	5.81	0.1813	WT
TCGA-BP-4787	DECEASED	15.77	0.1826	WT
TCGA-B0-4699	DECEASED	3.61	0.1834	WT
TCGA-CZ-5454	DECEASED	23.72	0.1855	WT
TCGA-CJ-4890	LIVING	115.6	0.198	WT
TCGA-CZ-5466	LIVING	22.5	0.2031	WT
TCGA-B8-5162	LIVING	1.18	0.2147	WT
TCGA-BP-4351	LIVING	31.87	0.2164	WT
TCGA-A3-3306	LIVING	36.79	0.2363	WT
TCGA-BP-5174	LIVING	74.15	0.2432	WT
TCGA-B0-5080	DECEASED	11.24	0.2469	WT
TCGA-CZ-5464	LIVING	69.91	0.2539	WT
TCGA-BP-4337	DECEASED	0.07	0.2872	WT
TCGA-BP-4177	LIVING	54.86	0.2965	WT
TCGA-CJ-5683	LIVING	62.06	0.3003	WT
TCGA-CJ-4870	LIVING	49.21	0.3038	WT
TCGA-B0-5697	LIVING	86.4	0.3053	WT
TCGA-CJ-4887	DECEASED	30.62	0.3157	WT
TCGA-CZ-5462	DECEASED	10.22	0.3229	WT
TCGA-A3-3358	LIVING	42.94	0.3334	WT
TCGA-B0-4707	DECEASED	19.71	0.3344	WT
TCGA-A3-3335	LIVING	61.96	0.3712	WT
TCGA-BP-4983	LIVING	46.42	0.374	WT
TCGA-BP-5183	LIVING	42.41	0.3835	WT
TCGA-CJ-4888	DECEASED	51.48	0.3853	WT
TCGA-B0-4818	DECEASED	16.75	0.4024	WT
TCGA-AK-3429	LIVING	109.33	0.4124	WT
TCGA-B0-5696	LIVING	85.71	0.4151	WT
TCGA-B0-5700	LIVING	58.8	0.4192	WT
TCGA-B0-4833	DECEASED	78.38	0.4301	WT
TCGA-BP-4335	DECEASED	15.6	0.4472	WT
TCGA-3Z-A93Z	LIVING	12.65	0.4566	WT
TCGA-BP-4971	LIVING	48.85	0.46	WT
TCGA-BP-4798	DECEASED	10.97	0.4757	WT
TCGA-BP-4176	LIVING	64.22	0.4763	WT
TCGA-CW-6087	DECEASED	1.35	0.4963	WT
TCGA-CZ-5468	DECEASED	1.94	0.5021	WT
TCGA-CZ-5459	LIVING	55.29	0.5182	WT
TCGA-MW-A4EC	LIVING	16.36	0.5618	WT
TCGA-B0-5085	DECEASED	25.3	0.59	WT
TCGA-B0-4843	DECEASED	10.51	0.5963	WT
TCGA-B0-4817	DECEASED	33.48	0.6269	WT
TCGA-BP-5199	LIVING	44.51	0.6496	WT
TCGA-BP-5010	DECEASED	28.84	0.6746	WT
TCGA-CJ-4642	LIVING	105.29	0.6765	WT
TCGA-A3-3346	DECEASED	4.5	0.6786	WT
TCGA-DV-5573	LIVING	37.12	0.6833	WT
TCGA-B0-5707	LIVING	123	0.6952	WT
TCGA-BP-4167	LIVING	89.29	0.6979	WT
TCGA-CJ-4923	DECEASED	18.79	0.7002	WT
TCGA-BP-4165	LIVING	99.77	0.7022	WT
TCGA-B0-5094	DECEASED	10.94	0.7087	WT
TCGA-AK-3425	LIVING	109.82	0.7194	WT
TCGA-BP-5201	LIVING	31.24	0.7253	WT
TCGA-B8-A54G	LIVING	1.74	0.7281	WT
TCGA-B0-5692	LIVING	129.57	0.729	WT
TCGA-BP-4962	LIVING	58.64	0.7373	WT
TCGA-B2-4098	DECEASED	1.68	0.7479	WT
TCGA-B8-4143	DECEASED	23.29	0.749	WT
TCGA-DV-5568	LIVING	12.16	0.7491	WT
TCGA-CJ-4640	LIVING	114.32	0.7749	WT
TCGA-AK-3455	DECEASED	22.44	0.7788	WT
TCGA-BP-4985	DECEASED	31.27	0.847	WT
TCGA-B0-4810	DECEASED	15.7	0.8479	WT
TCGA-BP-4992	LIVING	16.46	0.8673	WT
TCGA-CZ-4860	DECEASED	6.77	0.8677	WT
TCGA-BP-4989	LIVING	3.88	0.8697	WT
TCGA-B0-5121	LIVING	48.78	0.8969	WT
TCGA-AS-3777	LIVING	40.67	0.9155	WT
TCGA-DV-A4VZ	LIVING	11.99	0.946	WT
TCGA-MM-A563	LIVING	19.42	0.9476	WT
TCGA-B0-5092	DECEASED	15.08	0.9655	WT
TCGA-MM-A84U	LIVING	23	0.9799	WT
TCGA-BP-5170	LIVING	79.24	0.9837	WT
TCGA-CZ-5452	LIVING	58.77	0.9945	WT
TCGA-CJ-4875	DECEASED	116.75	1.0608	WT
TCGA-CJ-4881	LIVING	66.16	1.0834	WT
TCGA-B0-4811	DECEASED	46.55	1.0909	WT
TCGA-BP-5190	LIVING	33.21	1.1216	WT
TCGA-BP-4343	DECEASED	62.81	1.1354	WT
TCGA-B2-4099	LIVING	31.93	1.1413	WT
TCGA-BP-4799	DECEASED	37.22	1.2097	WT
TCGA-B0-4815	DECEASED	52.17	1.2132	WT
TCGA-CJ-4912	LIVING	54.43	1.2751	WT
TCGA-B4-5835	LIVING	0.53	1.2887	WT
TCGA-AK-3453	LIVING	83.15	1.3026	WT
TCGA-B0-5400	LIVING	56.93	1.3479	WT
TCGA-BP-4776	LIVING	13.5	1.3774	WT
TCGA-BP-5185	LIVING	37.19	1.4219	WT
TCGA-AK-3458	LIVING	38.37	1.4403	WT
TCGA-A3-3363	LIVING	10.48	1.4441	WT
TCGA-B0-4841	DECEASED	6.7	1.5487	WT
TCGA-BP-5178	DECEASED	62.81	1.6077	WT
TCGA-CJ-4873	LIVING	74.21	1.6139	WT
TCGA-BP-4758	LIVING	72.54	1.629	WT
TCGA-CJ-4869	LIVING	83.9	1.6357	WT
TCGA-B8-A54I	LIVING	4.93	1.6666	WT
TCGA-B0-4839	DECEASED	53.84	1.7572	WT
TCGA-B0-4696	DECEASED	28.45	1.788	WT
TCGA-CJ-4891	DECEASED	26.91	1.8862	WT
TCGA-CJ-5678	DECEASED	18.86	1.9556	WT
TCGA-DV-A4VX	DECEASED	53.42	1.9747	WT
TCGA-B0-5100	DECEASED	62.84	2.0008	WT
TCGA-B0-4698	DECEASED	1.38	2.0061	WT
TCGA-BP-5000	LIVING	18.5	2.0076	WT
TCGA-MM-A564	LIVING	19.94	2.0099	WT
TCGA-AK-3436	LIVING	109.43	2.0358	WT
TCGA-BP-4761	LIVING	5.98	2.0382	WT
TCGA-G6-A8L6	DECEASED	10.28	2.1319	WT
TCGA-BP-4981	DECEASED	36.04	2.1552	WT
TCGA-B0-4691	DECEASED	4.57	2.2373	WT
TCGA-B0-4821	DECEASED	40.41	2.2699	WT
TCGA-BP-4352	DECEASED	11.3	2.356	WT
TCGA-B0-4697	DECEASED	18.99	2.4535	WT
TCGA-AK-3426	DECEASED	29.07	2.7709	WT
TCGA-B0-5109	DECEASED	19.28	3.0764	WT
TCGA-G6-A5PC	DECEASED	7.95	3.3366	WT
TCGA-BP-4770	DECEASED	10.81	3.7007	WT
TCGA-B0-5098	DECEASED	52.04	3.7426	WT
TCGA-BP-5191	LIVING	31.77	4.0746	WT
TCGA-G6-A8L7	LIVING	70.07	4.5857	WT
TCGA-AK-3447	LIVING	39.98	4.9103	WT
TCGA-AK-3427	LIVING	117.71	5.0938	WT
TCGA-B0-5084	DECEASED	7.29	6.604	WT
TCGA-B4-5832	LIVING	5.09	-1.6247	Mut
TCGA-A3-3331	LIVING	48.78	-1.5175	Mut
TCGA-B0-5402	LIVING	42.38	-1.2338	Mut
TCGA-B0-5703	LIVING	73.78	-1.1426	Mut
TCGA-EU-5906	LIVING	6.77	-1.0576	Mut
TCGA-AK-3444	LIVING	48.32	-1.0433	Mut
TCGA-B8-5549	LIVING	6.37	-1.0351	Mut
TCGA-B4-5836	LIVING	4.63	-1.006	Mut
TCGA-BP-4789	LIVING	48.92	-0.998	Mut
TCGA-BP-4995	LIVING	45.04	-0.9922	Mut
TCGA-BP-4342	DECEASED	74.11	-0.9745	Mut
TCGA-EU-5904	LIVING	18.1	-0.9589	Mut
TCGA-CW-5580	DECEASED	64.52	-0.9406	Mut
TCGA-BP-4967	LIVING	6.73	-0.9361	Mut
TCGA-BP-4973	LIVING	45.47	-0.9341	Mut
TCGA-BP-4982	LIVING	33.31	-0.9332	Mut
TCGA-BP-4999	LIVING	41.59	-0.9246	Mut
TCGA-B8-5159	LIVING	23.72	-0.8973	Mut
TCGA-A3-3373	LIVING	53.25	-0.8972	Mut
TCGA-A3-3362	LIVING	51.22	-0.8092	Mut
TCGA-B0-5104	DECEASED	90.41	-0.8034	Mut
TCGA-B8-5165	LIVING	24.21	-0.7873	Mut
TCGA-BP-5004	LIVING	36.99	-0.7861	Mut
TCGA-BP-4161	LIVING	90.21	-0.7854	Mut
TCGA-BP-4963	LIVING	60.25	-0.7826	Mut
TCGA-CJ-4885	LIVING	113.37	-0.7705	Mut
TCGA-BP-4965	LIVING	61.47	-0.7321	Mut
TCGA-B8-5550	LIVING	48.49	-0.7267	Mut
TCGA-BP-4329	DECEASED	27.76	-0.723	Mut
TCGA-BP-4961	LIVING	63.57	-0.7227	Mut
TCGA-BP-4970	LIVING	14.22	-0.7084	Mut
TCGA-CW-5581	LIVING	91.95	-0.6982	Mut
TCGA-BP-4166	LIVING	0.43	-0.6865	Mut
TCGA-A3-3376	DECEASED	55.72	-0.6584	Mut
TCGA-B0-5713	LIVING	91.39	-0.6309	Mut
TCGA-BP-4765	LIVING	71.75	-0.6107	Mut
TCGA-B0-5812	LIVING	125.95	-0.5889	Mut
TCGA-BP-4998	LIVING	30.62	-0.5822	Mut
TCGA-BP-5008	LIVING	35.18	-0.5735	Mut
TCGA-B0-5113	LIVING	38.6	-0.5625	Mut
TCGA-AK-3445	LIVING	78.58	-0.5525	Mut
TCGA-BP-4975	LIVING	47.08	-0.5371	Mut
TCGA-CJ-4644	DECEASED	11.04	-0.5288	Mut
TCGA-BP-4974	DECEASED	6.93	-0.5239	Mut
TCGA-B0-5705	LIVING	149.05	-0.5238	Mut
TCGA-B8-5164	LIVING	0.85	-0.5136	Mut
TCGA-B0-4827	DECEASED	29.07	-0.5102	Mut
TCGA-CJ-4920	DECEASED	4.57	-0.4806	Mut
TCGA-B0-4945	DECEASED	70.47	-0.4735	Mut
TCGA-BP-4782	LIVING	11.63	-0.4613	Mut
TCGA-B0-4710	LIVING	57.65	-0.4605	Mut
TCGA-BP-4355	DECEASED	31.31	-0.4595	Mut
TCGA-CW-5591	LIVING	74.61	-0.4474	Mut
TCGA-B0-4824	DECEASED	54.43	-0.4407	Mut
TCGA-CZ-5987	DECEASED	14.62	-0.4241	Mut
TCGA-CZ-4853	LIVING	25.43	-0.4161	Mut
TCGA-A3-3382	LIVING	18.86	-0.4096	Mut
TCGA-BP-4349	LIVING	12.22	-0.3979	Mut
TCGA-CZ-5458	LIVING	91.62	-0.3971	Mut
TCGA-BP-5007	LIVING	37.45	-0.3914	Mut
TCGA-BP-4340	DECEASED	18.46	-0.3755	Mut
TCGA-BP-4964	LIVING	61.17	-0.3736	Mut
TCGA-B0-5095	DECEASED	8.05	-0.3718	Mut
TCGA-B4-5843	LIVING	0.36	-0.3481	Mut
TCGA-B0-4703	DECEASED	5.98	-0.3343	Mut
TCGA-BP-5195	LIVING	24.61	-0.3279	Mut
TCGA-B0-4845	DECEASED	65.24	-0.3226	Mut
TCGA-B0-5116	LIVING	41.85	-0.3193	Mut
TCGA-B0-5710	LIVING	79.83	-0.3188	Mut
TCGA-B0-5077	DECEASED	43.27	-0.3015	Mut
TCGA-CZ-5455	DECEASED	18.43	-0.2962	Mut
TCGA-CZ-5457	LIVING	90.47	-0.2917	Mut
TCGA-B0-5096	DECEASED	2.23	-0.2822	Mut
TCGA-CJ-4894	DECEASED	27.63	-0.2558	Mut
TCGA-BP-4771	DECEASED	5.32	-0.2538	Mut
TCGA-CJ-4918	DECEASED	3.06	-0.2399	Mut
TCGA-AK-3450	LIVING	58.44	-0.233	Mut
TCGA-CZ-4856	LIVING	0.59	-0.2312	Mut
TCGA-B8-5551	LIVING	0.53	-0.2167	Mut
TCGA-CZ-4861	DECEASED	14.65	-0.2052	Mut
TCGA-BP-5006	LIVING	27.6	-0.1984	Mut
TCGA-BP-5187	LIVING	13.34	-0.1881	Mut
TCGA-B0-5106	DECEASED	52.5	-0.1576	Mut
TCGA-B2-3924	LIVING	35.87	-0.1162	Mut
TCGA-CJ-4903	LIVING	51.25	-0.1064	Mut
TCGA-BP-4762	DECEASED	44.12	-0.1037	Mut
TCGA-BP-4986	LIVING	25.79	-0.0883	Mut
TCGA-B0-4828	DECEASED	10.09	-0.068	Mut
TCGA-B8-4154	LIVING	45.34	-0.055	Mut
TCGA-B0-4852	DECEASED	36.83	-0.0417	Mut
TCGA-B0-5108	LIVING	58.54	-0.0396	Mut
TCGA-CZ-5460	LIVING	94.38	-0.0279	Mut
TCGA-CJ-4884	LIVING	57.79	-0.0175	Mut
TCGA-B8-5163	LIVING	27	-0.008	Mut
TCGA-CJ-5676	LIVING	133.61	-0.0069	Mut
TCGA-CW-5588	LIVING	66.26	-0.0059	Mut
TCGA-CZ-5470	LIVING	12.68	0.0931	Mut
TCGA-CJ-4872	LIVING	47.14	0.1416	Mut
TCGA-B8-4621	LIVING	25.89	0.1605	Mut
TCGA-B0-5102	DECEASED	90.8	0.2251	Mut
TCGA-CJ-5672	DECEASED	71.94	0.2283	Mut
TCGA-BP-5173	DECEASED	2.04	0.2347	Mut
TCGA-BP-4763	DECEASED	41.72	0.241	Mut
TCGA-B0-4713	DECEASED	6.64	0.2423	Mut
TCGA-CJ-6030	DECEASED	75.53	0.2528	Mut
TCGA-B0-5399	LIVING	46.35	0.2797	Mut
TCGA-B0-5088	DECEASED	18.5	0.2822	Mut
TCGA-B0-4706	DECEASED	2.14	0.3151	Mut
TCGA-B0-4690	DECEASED	1.41	0.3344	Mut
TCGA-CJ-4638	DECEASED	14.16	0.3443	Mut
TCGA-BP-5009	DECEASED	35.87	0.3545	Mut
TCGA-B8-4153	LIVING	25.03	0.3682	Mut
TCGA-BP-4759	LIVING	77.92	0.3698	Mut
TCGA-B0-4814	DECEASED	5.52	0.3938	Mut
TCGA-CJ-6031	LIVING	62.61	0.416	Mut
TCGA-A3-3383	LIVING	28.29	0.4683	Mut
TCGA-BP-5001	LIVING	38.67	0.472	Mut
TCGA-B0-4714	DECEASED	3.25	0.4756	Mut
TCGA-CZ-4858	DECEASED	69.15	0.487	Mut
TCGA-CJ-4916	LIVING	45.11	0.6032	Mut
TCGA-CJ-5675	LIVING	129.3	0.6145	Mut
TCGA-BP-4960	LIVING	71.35	0.615	Mut
TCGA-BP-5196	LIVING	33.44	0.651	Mut
TCGA-BP-5177	LIVING	9.63	0.7143	Mut
TCGA-CJ-5679	DECEASED	22.31	0.7371	Mut
TCGA-B0-4819	DECEASED	6.01	0.7418	Mut
TCGA-B0-5081	DECEASED	11.89	0.7752	Mut
TCGA-BP-4968	LIVING	57.36	1.0108	Mut
TCGA-CJ-6033	DECEASED	7.36	1.0693	Mut
TCGA-CJ-5677	DECEASED	25.69	1.1029	Mut
TCGA-B0-4842	DECEASED	56.64	1.1322	Mut
TCGA-B0-4700	DECEASED	65.05	1.1538	Mut
TCGA-CJ-6027	DECEASED	118.76	1.1842	Mut
TCGA-CJ-4900	DECEASED	56.31	1.4917	Mut
TCGA-AK-3451	LIVING	94.22	1.5995	Mut
TCGA-CZ-5469	DECEASED	31.08	1.6708	Mut
TCGA-B0-4822	DECEASED	36.5	1.7808	Mut
TCGA-B0-4847	DECEASED	26.05	1.9423	Mut
TCGA-BP-4159	DECEASED	85.45	2.1173	Mut
TCGA-B0-4712	DECEASED	43.92	2.7492	Mut
TCGA-BP-5169	LIVING	6.34	3.5924	Mut
TCGA-BP-5175	LIVING	30.62	5.8833	Mut
TCGA-CJ-6032	LIVING	119.55	-1.4746	Mut
TCGA-B0-5110	LIVING	66	-1.2007	Mut
TCGA-BP-4162	LIVING	100.99	-0.8567	Mut
TCGA-BP-5180	LIVING	74.34	-0.6342	Mut
TCGA-B0-5097	LIVING	21.85	-0.5281	Mut
TCGA-B0-5695	LIVING	70.63	-0.4271	Mut
TCGA-CJ-5684	LIVING	73.29	-0.1268	Mut
TCGA-BP-5176	DECEASED	52.23	0.0715	Mut
TCGA-BP-4988	DECEASED	27.2	0.152	Mut
TCGA-CJ-4636	LIVING	63.21	0.5358	Mut
TCGA-B0-5107	DECEASED	30.45	1.1987	Mut
TCGA-BP-4164	DECEASED	32.59	-1.5958	Mut

## Sheet: E
TUHR14TKB
Concentration (nM)			Vector				EXOSC1-OE
0		1.03	1.01	0.96		1.02	1.05	0.93
100		0.95	0.99	0.87		0.65	0.78	0.77
400		0.85	0.75	0.87		0.31	0.4	0.44
600		0.64	0.75	0.8		0.1	0.23	0.2
800		0.51	0.54	0.42		0.18	0.16	0.05
1000		0.33	0.38	0.45		0.15	0.16	0.05

## Sheet: F
769-P
Concentration (nM)			Vector				EXOSC1-OE
0		0.97	1	1.03		1.04	1.01	0.95
100		0.94	0.98	0.85		0.66	0.72	0.75
400		0.95	0.8	0.87		0.25	0.38	0.35
600		0.79	0.66	0.8		0.27	0.31	0.2
800		0.52	0.43	0.55		0.16	0.23	0.26
1000		0.31	0.37	0.43		0.2	0.11	0.2

## Sheet: G
Days	Ctrl		EXOSC1-OE		EXOSC1-OE+Nir		Ctrl+Nir
	0		0		0		0
	0		0		0		0
4	0		0		0		0
	0		0		0		0
	0		0		0		0
7	31		22.2		16.7		15.6
	17.9		9.9		8.5		3.5
	22.4		11.6		8.3		27.5
	26		14.1		12.5		10.2
	21.3		20.1		19.3		23.8
	31.4		9		12.7		15.4
12	51.7		32.8		17.4		19.9
	45.6		56		18.1		53.9
	71.7		33.2		22		23.3
	59.3		31.6		47		33.3
	55.4		55.1		30.5		24.1
	58.2		31.4		39		19.5
14	91.1		82.4		42.6		107.3
	100.9		84		43.6		42.8
	91.5		100.1		40.6		85.8
	88.6		106.2		66.4		59.6
	123.6		66.2		38.9		115.7
	74.3		92		70.9		38.8
18	208.6		156.8		88.7		82.2
	160.4		173.3		64.2		136.6
	199.3		184.3		38.8		92
	208.7		199.3		44.6		160.3
	195.7		102.1		54.7		72.6
	230.2		138.3		56.9		158.4
21	417.3		302		55.6		196
	340		301		42.4		114.1
	442.4		313		60.7		171.6
	354.4		309.9		85.9		71.7
	319.3		213.8		69.8		266.2
	370.6		309.3		81.6		203.4
25	879.1		579.4		35.6		370.7
	1300.3		768.9		80.4		176.3
	913.5		712.4		73.9		228.4
	1133.6		823.1		67.1		341.8
	846.3		621.7		26.2		202.4
	1047.4		544.3		64.9		273.3
28	1454.2		1081.1		61.2		488.3
	1098.7		813.1		88.6		478.9
	1472.1		799.1		117.4		344.3
	1376.9		847		22.5		322.5
	1112.4		1017.7		56		462.6
	1309.7		944		41.3		177.4
30			1067.3		77.4		776.8
			1313		61.1		765.7
			934.7		11.8		583.4
			1260.5		111.4		399.4
			1338.9		113.6		560.5
			1435.6		44.8		829.2
35					142		1045.3
					67.1		1273.5
					32.4		1320.7
					65.5		1493.5
					113.9		927.8
					29		941.2

## Sheet: H
Days	Ctrl		EXOSC1-OE		EXOSC1-OE+Nir		Ctrl+Nir
4	104.1		102.3		110.9		106.3
	99		108.5		102.2		104.1
	101.6		104.4		100		100
	98.3		97.5		98.9		111.5
	105.5		109.2		100		100.5
	97.4		102.1		100.1		101.5
7	104.7		98.2		106		108.6
	98.6		114.1		107.9		103.1
	107.9		103.9		105.6		114.7
	110.4		108.7		100.6		107.3
	96.9		106.9		101.4		98.8
	99.6		110.2		108.4		103.5
12	109.1		106		105.7		106.3
	111.9		109.9		118.4		114.3
	113.9		109.1		102.8		109.3
	106		114.8		106.4		110.1
	115		111.8		105.7		113.3
	104.1		102.3		109.1		106.7
14	115.6		96.7		106		102.3
	115.1		106.3		105.7		111.5
	112.3		108.2		110.2		111.7
	102.9		107		115.2		109
	109		113.6		102.5		105.6
	105.1		110.3		108.4		102
18	117.4		112		113.6		108.3
	115.1		121.3		112.6		99.8
	115.3		110.4		114.9		109.8
	113.3		117.7		112.7		103
	112.6		114.1		117		99.1
	104.3		114.6		107.2		116
21	115.3		122.3		119		104.2
	117		112.2		108		99.4
	119.6		105.7		111.5		106.7
	103.3		116.8		110.4		115.7
	112.6		114.1		115.2		109.8
	116.1		112.9		107.8		106.8
25	105.7		113.2		113.7		110
	112.8		105.8		112.6		105.7
	119.1		111.3		115.9		109.9
	122		114		119.3		111.9
	114.8		110.9		102.9		110.3
	115.6		116.9		113.6		100.1
28	99.3		110.8		111		103.8
	117.5		118.8		114		112.9
	109.9		111		116.2		109.1
	116.1		117.1		107		98.4
	113.7		113.7		117.2		105.8
	109.6		106.6		118.8		112
30			104.5		113.9		101.8
			107.1		120		103.4
			115		115.3		113.5
			112.1		117.1		103.3
			104.3		113.2		115
			117		110.5		105
35					106.5		110.7
					118.4		107.2
					119.7		101.1
					110.5		112.3
					110.7		104.7
					118.3		99.8

## Sheet: I
Days	Ctrl		EXOSC1-OE		EXOSC1-OE+Nir		Ctrl+Nir
4	0		0		0		0
	0		0		0		0
	0		0		0		0
	0		0		0		0
	0		0		0		0
	0		0		0		0
7	19		38		7		15
	20		19		14		13
	24		24		12		30
	23		18		17		10
	18		8		23		15
	15		8		11		25
12	75		40		39		25
	59		19		11		18
	67		55		28		53
	38		25		26		47
	6		11		28		25
	79		42		25		23
14	97		95		59		56
	99		123		51		31
	105		154		61		118
	78		102		47		88
	76		68		39		87
	152		46		80		111
18	820		306		71		176
	517		120		61		240
	717		301		108		86
	759		208		50		98
	775		375		74		173
	1001		401		103		97
21	959		446		51		150
	1092		618		137		315
	1244		658		87		162
	728		307		62		305
	978		554		67		231
	957		698		88		180
25	1877		1151		80		203
	1994		950		96		385
	1675		557		43		299
	1403		943		81		376
	1589		783		108		364
	1901		1004		126		209
28			1412		136		503
			1807		101		455
			1328		65		431
			2046		81		612
			1784		125		504
			1571		117		214
30					117		706
					68		755
					116		406
					137		580
					219		655
					87		780
35					255		1604
					58		1415
					166		1343
					133		1772
					166		1706
					157		1495

## Sheet: J
Days	Ctrl		EXOSC1-OE		EXOSC1-OE+Nir		Ctrl+Nir
4	103		116.5		104.7		101.8
	102.3		109.4		106.9		101.7
	106.2		110.9		98.8		107.8
	104.2		103.7		102.4		107.8
	98.9		104		99.9		100.2
	97.5		115.5		99.2		104.8
7	112.2		102.7		102		107.9
	112.1		106.3		98.5		113.4
	99.9		109.7		104.4		106.6
	110.9		94.7		101.8		102.1
	116.1		98.8		95.5		97.7
	108.8		105.8		97.8		102.2
12	109.3		111.1		109.1		101.9
	109.4		105.8		109.3		109.3
	111.9		105.2		106.6		102.6
	107.6		107.9		116.1		103.5
	103.4		103		117.8		109
	112.5		115		113		103.7
14	101.7		114		107.5		101.4
	102.1		105.2		109		113.5
	109.8		113.9		111.2		105.2
	98.3		116.3		117.8		104.6
	108.6		109.6		109.7		102
	103.5		107.1		104.8		103.4
18	113.5		101.4		114.1		121.5
	116.2		105.8		115.6		116.8
	111.4		107.4		111.2		110.1
	123.8		109.5		107.7		117
	117.4		110.8		107.5		110.3
	113.8		107.2		109.9		114.3
21	116.5		110.3		113.6		110.8
	112		109.3		108.8		112.7
	109.2		111.4		115.3		106.2
	111.2		111.3		111.6		112.1
	117.5		113.7		115.1		112.7
	111.5		104		107.5		105.5
25	114.2		108.8		112.2		113
	108		112.8		114.7		107
	123.1		108.6		104.5		117.9
	110.1		109.3		115.5		112.5
	113.2		104.9		116.3		106.8
	109.4		103.6		114.8		114.8
28			118.8		116		106.1
			114.2		114.2		103.5
			108.3		124.7		113.2
			107.1		112		117.7
			109.9		118.8		110.1
			113.6		116.3		115.5
30					113.3		108.2
					111.6		105.3
					111.8		112.8
					118.4		110.4
					114.3		108.9
					108.6		114.4
35					116.9		112.8
					105.9		121
					113		113.6
					119		116.1
					105.9		112.8
					111.3		107.7
