# Supplementary material for: Exosome component 1 cleaves single-stranded DNA and sensitizes human kidney renal clear cell carcinoma cells to poly(ADP-ribose) polymerase inhibitor
Source: eLife journal article supplement (doi:10.7554/elife.69454), 2021-06-23
Supplement: supp [file elife_poa_e69454_Figure_1_figure_supplement_1_source_data_1.xlsx]

## Sheet: A
Term	-log (p value)
GO:0022613_ribonucleoprotein complex biogenesis	7.26	C>A/G>T
GO:0006091_generation of precursor metabolites and energy	5.24	C>A/G>T
GO:0006767_water-soluble vitamin metabolic process	4.49	C>A/G>T
GO:0007005_mitochondrion organization	4.39	C>A/G>T
GO:0051168_nuclear export	4	C>A/G>T
GO:0071897_DNA biosynthetic process	5.78	A>C/T>G
GO:0044282_small molecule catabolic process	5.52	A>C/T>G
GO:0005975_carbohydrate metabolic process	4.99	A>C/T>G
GO:1901136_carbohydrate derivative catabolic process	4.85	A>C/T>G
GO:0090407_organophosphate biosynthetic process	4.07	A>C/T>G
GO:0032543_mitochondrial translation	10.83	A>G/T>C
GO:0071897_DNA biosynthetic process	6.72	A>G/T>C
GO:0051301_cell division	6.49	A>G/T>C
GO:0045859_regulation of protein kinase activity	5.33	A>G/T>C
GO:0080135_regulation of cellular response to stress	4.92	A>G/T>C
GO:0044283_small molecule biosynthetic process	12.98	A>T/T>A
GO:0044282_small molecule catabolic process	10.37	A>T/T>A
GO:0140053_mitochondrial gene expression	7.55	A>T/T>A
GO:0007005_mitochondrion organization	7.1	A>T/T>A
GO:0008610_lipid biosynthetic process	6.57	A>T/T>A
GO:0140053_mitochondrial gene expression	7.52	C>G/G>C
GO:0090407_organophosphate biosynthetic process	6.63	C>G/G>C
GO:0006520_cellular amino acid metabolic process	6.08	C>G/G>C
GO:0034976_response to endoplasmic reticulum stress	5.81	C>G/G>C
GO:0090181_regulation of cholesterol metabolic process	5.28	C>G/G>C
GO:0140053_mitochondrial gene expression	7.52	C>T/G>A
GO:0090407_organophosphate biosynthetic process	6.63	C>T/G>A
GO:0006520_cellular amino acid metabolic process	6.08	C>T/G>A
GO:0034976_response to endoplasmic reticulum stress	5.81	C>T/G>A
GO:0090181_regulation of cholesterol metabolic process	5.28	C>T/G>A

## Sheet: C
	A>C/T>G	C>G/G>C	A>T/T>A	A>G/T>C	C>T/G>A	C>A/G>T
Normalized Mutations per patient	0.01	0.01	0.01	0.03	0.07	0.02

## Sheet: D
	A>C/T>G	C>G/G>C	A>T/T>A	A>G/T>C	C>T/G>A	C>A/G>T
Normalized Mutations per patient	0.0149813	0.0339199	0.0524345	0.0543071	0.0551198	0.0664264
