# Supplementary material for: Exosome component 1 cleaves single-stranded DNA and sensitizes human kidney renal clear cell carcinoma cells to poly(ADP-ribose) polymerase inhibitor
Source: eLife journal article supplement (doi:10.7554/elife.69454), 2021-06-23
Supplement: supp [file elife_poa_e69454_Figure_2_figure_supplement_1_source_data_1.xlsx]

## Sheet: D
	Normalized Mutation Frequency (%)
	Vector	EXOSC1
A>G/T>C	12.5	2.7
A>C/T>G	25	2.7
A>T/T>A	12.5	8.11
C>A/G>T	3.83	41.45
C>G/G>C	19.17	4.97
C>T/G>A	24.92	6.63
