# Supplementary material for: Exosome component 1 cleaves single-stranded DNA and sensitizes human kidney renal clear cell carcinoma cells to poly(ADP-ribose) polymerase inhibitor
Source: eLife journal article supplement (doi:10.7554/elife.69454), 2021-06-23
Supplement: supp [file elife_poa_e69454_Figure_2_source_data_1.xlsx]

## Sheet: B
Vector	AID	CDK5	TARBP2	EXOSC1	RAB5IF	CCNB1	PSAT1	NECAB3
6	87	19	1	220	19	6	6	49
5	29	15	1	180	15	5	11	38
7	32	49	1	99	49	7	15	30
13	28	38	1	200	38	13	22	11
11	45	30	4	30	30	11	3	40
7	68	11	6	55	11	7	6	52
6	25	40	19	33	40	6	12	42
8	34	52	40	157	52	8	22	44
7	37	42	5	125	42	7	7	54
9	44	44	11	135	12	9	6	115
12	38	54	7	96	8	12	13	1
11	35	32	9	70	7	11	12	1
7	74	33	9	79	9	7	10	1
66	78	49	9	90	12	9	12	1
6	67	29	12	66	11	9	10	4
11	66	49	11	114	7	9	13	6
15	36	45		39	66	12		19
22	48	22		119	6	11		40
3	47	37		114	11	19		5
6	145	17		90	15	15		11
12	48	26		43		49
40	47	28		110		38
7	37	57		49		30
6	37	54		206
13	35	62		299
12	46	79		50
10	32			101
12	30			43
10	31			126

## Sheet: C
Vector	AID	EXOSC1	EXOSC2	EXOSC3	EXOSC4	EXOSC5	EXOSC6	EXOSC7	EXOSC8	EXOSC9
4	66	186	7	19	6	11	8	19	6	5
8	29	103	12	15	5	15	7	15	11	11
15	32	201	32	15	7	22	9	49	15	7
11	28	220	12	38	13	12	12	38	6	9
9	45	55	23	30	11	22	11	30	5	9
6	68	103	14	11	7	13	22	11	7	9
8	45	157	15	16	6	12	40	40	13	12
9	34	125	16	12	8	10	25	52	11	11
9	37	135	17	8	7	12	7	42	7	6
12	44	93	22	7	9	10	6	44	6	11
15	38	71	24	9	12	13	8	54	8	15
11	35	77	26	12	11	48	7	26	7	22
40	74	94	10	11	7	47	9	28	9	3
25	78	62	9	7	9	37	12	57	12	6
23	67	114	32	6	9	37	11	54	11	12
18	66	78	37	11	9	35	13	62	13	40
6	36	109	26	15	12	46	10	79		5
33	48	114	25		11	32	23			11
12	47	93	23		19	30
11	89	43	10		15	31
21	53	110	32		49
7	52	49	18		38
6	56	206	12		30
37		199
18		53
11		101
12		57
7		126

## Sheet: D
Vector + IPTG	EXOSC1 + IPTG	Vector	EXOSC1
10	220	6	24
8	180	5	29
7	99	7	32
9	200	13	28
12	220	11	45
11	55	7	32
22	103	10	25
40	157	8	34
25	125	7	37
6	125	18	21
8	96	12	38
7	70	11	35
9	79	25	14
12	113	30	26
11	66	6	17
13	114	11	37
7	78	15	36
6	119	22	20
37	114	3	19
12	90	6	14
10	43	12	6
12	62	40	9
10	49.14	7	37
6	206	6	37
5	199	13	35
7	50	12	10
13	71.4	10	32
11	56	12	30
7	126	10	31
6	83	11	25

## Sheet: J
	Mutation Frequency (%)
	Vector	EXOSC1
A>T	6.25	5.56
A>G	12.5	0.1
A>C	6.25	2.78
T>A	6.25	2.78
T>G	6.25	0.1
T>C	12.5	0.1
G>A	3.13	0.1
G>T	6.25	16.67
G>C	0.1	2.78
C>A	0.1	52.78
C>T	37.5	11.11
C>G	3.13	5.56
