# Supplementary material for: Exosome component 1 cleaves single-stranded DNA and sensitizes human kidney renal clear cell carcinoma cells to poly(ADP-ribose) polymerase inhibitor
Source: eLife journal article supplement (doi:10.7554/elife.69454), 2021-06-23
Supplement: supp [file elife_poa_e69454_Figure_5_source_data_1.xlsx]

## Sheet: B
769-P				TUHR14TKB
Vector	EXOSC1-OE			Vector	EXOSC1-OE
1	9			2	21
1	15			2	17
2	13			0	24

## Sheet: C
769-P				TUHR14TKB
Vector	EXOSC1-KD			Vector	EXOSC1-KD
1.2	0.8			1.8	1.2
1.8	1.2			2.4	0.8
1.6	1.2			2	1.4

## Sheet: E
769-P				TUHR14TKB
Vector	EXOSC1-OE			Vector	EXOSC1-OE
2.1	24.7			1.1	24.7
4.5	10.3			3.5	30.3
1.5	16.4			1.5	16.4
