# Supplementary material for: Exosome component 1 cleaves single-stranded DNA and sensitizes human kidney renal clear cell carcinoma cells to poly(ADP-ribose) polymerase inhibitor
Source: eLife. 2021 Jun 23;10:e69454. doi: 10.7554/eLife.69454 (PMC8260222; doi:10.7554/eLife.69454)
Supplement: Supplementary file 1. [file elife-69454-supp1.xlsx]

## Sheet: Supplementary File 1
A>C/T>G				A>G/T>C				A>T/T>A				C>A/G>T				C>G/G>C				C>T/G>A
Gene	P value	R value		Gene	P value	R value		Gene	P value	R value		Gene	P value	R value		Gene	P value	R value		Gene	P value	R value
HEXB	1.88857e-06	0.228475		COQ5	2.57377e-05	0.202371		COQ5	8.23911e-07	0.236148		CDK7	7.22698e-07	0.237337		MRPS35	2.1798e-08	0.267025		MRPS35	2.09458e-09	0.285026
CERS2	8.13361e-06	0.216031		DHCR24	8.86135e-05	0.188761		LPCAT3	8.73731e-07	0.235614		LPCAT3	4.21116e-06	0.220795		SPATS2	7.90501e-08	0.257709		RAE1	2.05103e-08	0.26812
MCCC2	8.81406e-06	0.213718		TRIAP1	9.1427e-05	0.188404		PXMP2	8.64166e-06	0.213671		PHB2	5.60556e-06	0.217989		MCCC2	1.92874e-07	0.249269		ACTR3B	1.03249e-07	0.254296
GAA	2.00602e-05	0.20572		RNASEH2A	9.30467e-05	0.188204		ERCC2	1.04234e-05	0.212263		HM13	7.61226e-06	0.214945		NADK2	3.05578e-07	0.245274		TBL2	1.35353e-07	0.252298
SESN2	2.07469e-05	0.204652		FUK	0.000113776	0.187641		PIGQ	1.75784e-05	0.206389		EDEM2	1.07656e-05	0.211934		SLC35E3	3.34388e-07	0.244204		DNAJA3	3.58942e-07	0.244704
ZIC4	2.28805e-05	0.203619		C17ORF58	0.00010499	0.186818		MRPS35	1.79089e-05	0.206195		MGST1	1.19149e-05	0.210408		CERS2	4.59836e-07	0.243349		MRPL13	3.60267e-07	0.243548
C17ORF58	3.27318e-05	0.199796		TCTN1	0.000117133	0.186421		TMEM106C	2.42425e-05	0.203007		TARBP2	1.26052e-05	0.209831		PCBP2	4.69192e-07	0.241488		PTCD1	4.78937e-07	0.24214
TMEM19	3.62509e-05	0.198692		ATRAID	0.000109034	0.186383		MMP24	2.96283e-05	0.200867		WDR41	1.30289e-05	0.209734		LPCAT3	7.27156e-07	0.237281		COPS7A	4.76993e-07	0.241897
MTRR	4.16293e-05	0.197645		PDCD6	0.000141028	0.183391		ACADS	3.03577e-05	0.200606		MGAT4B	1.56936e-05	0.207809		GFM2	1.22835e-06	0.232487		DHCR24	4.65631e-07	0.241279
PDF	5.12056e-05	0.194913		TRAF4	0.00016855	0.18129		TULP3	4.71765e-05	0.19907		CCNB1	1.88126e-05	0.20568		DTWD2	2.33634e-06	0.226464		BET1	5.7219e-07	0.239439
TM7SF3	6.11887e-05	0.192936		TMBIM4	0.000236405	0.177238		HPN	4.80971e-05	0.195604		MLST8	2.21742e-05	0.204661		DNAJC22	3.64264e-06	0.222205		NECAB3	6.53035e-07	0.238252
KCNK2	6.25101e-05	0.192698		PDF	0.000248002	0.176657		MMAB	5.87387e-05	0.193392		TYSND1	2.2975e-05	0.204285		ZDHHC9	5.64025e-06	0.218432		KANSL2	7.0956e-07	0.237776
DHCR24	7.25531e-05	0.191026		FBXO4	0.000287699	0.175458		MLST8	7.2976e-05	0.191628		HTATIP2	2.74838e-05	0.201671		PEX5	6.89994e-06	0.21693		PHB2	7.45074e-07	0.237061
MRPS27	9.03358e-05	0.188541		HEXB	0.000274449	0.175423		DNAJA3	9.04908e-05	0.189402		RITA1	3.16195e-05	0.201101		RAD17	1.00798e-05	0.212605		COPZ1	8.21823e-07	0.236171
BIVM	9.47457e-05	0.188215		RPA3	0.000288065	0.17483		RITA1	9.48576e-05	0.188861		MRPS35	3.11684e-05	0.200323		WDR12	1.22064e-05	0.210648		LPCAT3	1.03086e-06	0.234101
CCDC125	0.000115603	0.185923		SESN2	0.000297182	0.174447		ECI1	9.04068e-05	0.188532		BLVRB	3.387e-05	0.199427		MLEC	1.55478e-05	0.207666		MAPKAPK5	1.17648e-06	0.233153
ALG6	0.000146678	0.184001		ENTPD2	0.00031268	0.173821		TMBIM6	0.000119546	0.185318		COPZ1	3.46931e-05	0.199168		TM7SF3	1.65312e-05	0.207029		C1ORF53	1.22863e-06	0.232485
KRT80	0.000155582	0.182237		MRPS7	0.000332374	0.173268		MGAT4B	0.000131949	0.184383		OGFOD2	4.60188e-05	0.196545		VEPH1	1.78556e-05	0.206226		EIF2AK1	1.43271e-06	0.23106
SLC30A5	0.000180648	0.181099		PLPPR5	0.000334588	0.172984		LCA5L	0.000136556	0.183768		SPR	4.42844e-05	0.196511		CPSF4L	1.86393e-05	0.205777		BRI3	2.04187e-06	0.228265
NADK2	0.00019449	0.179795		C16ORF59	0.000366979	0.171835		PCBP2	0.000141579	0.183559		SLC35C2	4.81846e-05	0.196267		TMBIM6	2.461e-05	0.202847		OXSM	1.95877e-06	0.228132
FUCA2	0.000232759	0.17784		CHMP1A	0.00041046	0.171032		SESN2	0.000141078	0.183387		MRPL36	5.39058e-05	0.194345		HEXB	2.47647e-05	0.20278		TMEM106C	1.98949e-06	0.227985
NEK2	0.000266424	0.175785		DNAJA3	0.000420669	0.170922		GFM2	0.000147541	0.182861		BET1	5.66622e-05	0.193792		PAIP1	3.00477e-05	0.201182		TBRG4	2.28517e-06	0.22746
ATG10	0.000279375	0.175205		MRPS35	0.000413396	0.170344		MCCC2	0.000156725	0.182362		ANAPC5	5.98891e-05	0.193625		HADHB	2.88213e-05	0.201163		ARPC1A	2.40241e-06	0.226721
ABCC3	0.000309473	0.173948		KIAA0101	0.000418418	0.170193		SLC35E3	0.000158636	0.182007		RAE1	6.00175e-05	0.193601		MGST1	2.97797e-05	0.200812		TARBP2	2.39244e-06	0.226238
MGST1	0.000374296	0.171589		PAQR4	0.000435961	0.169675		ACY1	0.000169075	0.181254		NABP2	6.20081e-05	0.193236		TFB2M	3.32236e-05	0.200332		C8ORF33	2.43157e-06	0.226084
METTL9	0.000416704	0.170642		CERS2	0.000494919	0.169454		BCL7A	0.000224407	0.177868		ZBED6CL	6.35152e-05	0.192519		C12ORF66	3.3753e-05	0.199928		MGAT4B	2.51039e-06	0.226041
SLC35E3	0.000404194	0.170627		OXSM	0.000458674	0.169033		PAK4	0.00025059	0.177358		PRDX4	7.62625e-05	0.190464		HSPD1	3.41807e-05	0.199328		SRXN1	2.87543e-06	0.224483
UGT1A6	0.00046383	0.168892		ZC3HC1	0.000473449	0.169025		SIRT4	0.000250882	0.176517		PDCD6	8.16353e-05	0.189693		TMEM182	3.56845e-05	0.198863		EARS2	2.96262e-06	0.224455
METTL7B	0.00047088	0.1687		ETHE1	0.000464646	0.168869		TM7SF3	0.000267245	0.175748		GCHFR	8.30269e-05	0.189501		AQP11	3.77209e-05	0.198261		MLST8	3.58938e-06	0.223119
ERCC2	0.000555339	0.166984		CD320	0.000466556	0.168817		RSPH14	0.000268753	0.175679		ITGAE	8.55526e-05	0.189161		SCD	4.27068e-05	0.196908		MDH2	3.71845e-06	0.222261
PAQR9	0.00057878	0.166064		RAC3	0.000485541	0.168311		GCHFR	0.00027071	0.17559		METTL1	8.67968e-05	0.188997		SLC25A13	4.49047e-05	0.196586		M6PR	3.99473e-06	0.222078
LCA5L	0.000580268	0.166031		SMYD5	0.000514696	0.168156		HNF1A	0.000277882	0.175271		POC5	8.96821e-05	0.188843		NR1H4	4.71919e-05	0.195813		SPIRE2	3.72483e-06	0.221988
FBXO4	0.000626748	0.165615		CBS	0.000521171	0.167408		SLC4A2	0.000299696	0.174955		DERA	9.10536e-05	0.188451		TMEM5	4.94633e-05	0.195522		YARS2	4.38434e-06	0.220657
C2ORF70	0.000615265	0.165275		PTK6	0.000521511	0.1674		CRB3	0.000294164	0.174572		POP4	9.15709e-05	0.188386		MAOB	6.75601e-05	0.195486		STAG3L4	4.78386e-06	0.219549
KCNIP4	0.000620201	0.165172		UBE2T	0.000551695	0.16668		FBXO17	0.000371989	0.174114		ZFAS1	9.77743e-05	0.187636		CLDN12	5.3175e-05	0.195175		DDX47	5.4785e-06	0.21872
NDFIP2	0.00072009	0.163419		TARBP2	0.000566924	0.16633		SPR	0.000306509	0.174067		NECAB3	0.000108026	0.18649		SND1	5.46661e-05	0.195096		HSPD1	5.60027e-06	0.217998
IRX5	0.000728183	0.163083		MLST8	0.000594304	0.166304		DNAJC22	0.000314692	0.173742		PSMD7	0.000108597	0.186429		NDUFS4	5.32901e-05	0.194472		DDIT3	5.91255e-06	0.217462
XPOT	0.000743656	0.162997		TMEM79	0.000623018	0.165887		CCDC125	0.00032663	0.173484		THAP8	0.000121467	0.185348		MRPL42	5.33767e-05	0.194454		XPOT	6.09513e-06	0.217411
TCTN1	0.000789232	0.162786		MCCC2	0.000600473	0.165782		GPT	0.000359697	0.172085		SNHG11	0.000119681	0.185305		STRAP	5.55933e-05	0.194003		DUS2	7.10683e-06	0.216886
POT1	0.000782855	0.162511		MRPS27	0.000597433	0.165655		SHMT1	0.000458875	0.17185		MAGOHB	0.000122464	0.185038		AHCY	6.16694e-05	0.192849		UQCC1	6.29012e-06	0.216848
VSIG10	0.000830353	0.162495		DIABLO	0.000599288	0.165615		METTL7A	0.000389111	0.171503		C20ORF24	0.00012661	0.184651		ERCC2	6.55148e-05	0.192619		AURKA	6.62488e-06	0.216333
LYRM1	0.000776005	0.162248		OR5I1	0.000617548	0.165227		CLPTM1L	0.000393435	0.171165		AMZ2	0.00012842	0.184485		MTRR	7.05914e-05	0.19178		GNPDA1	6.63379e-06	0.216319
SPATS2	0.000827955	0.162151		DGCR6	0.00066127	0.16434		NIPSNAP1	0.000408694	0.170488		TMEM106C	0.000132885	0.184087		ODC1	8.65225e-05	0.189033		SGK2	7.35565e-06	0.215289
WDR41	0.000825585	0.16162		POLD2	0.000678331	0.164009		OGFOD2	0.000425777	0.17037		CNPY2	0.00015057	0.183262		SLC30A5	9.19784e-05	0.188994		ASNS	7.59938e-06	0.214962
RITA1	0.000896314	0.161094		TMEM9	0.000730076	0.163621		AMDHD2	0.000471772	0.168676		CCT5	0.000144409	0.183113		COQ5	8.84654e-05	0.18878		C12ORF73	7.81052e-06	0.214688
TMEM64	0.000860743	0.160879		TK1	0.000726595	0.163111		MMACHC	0.000474072	0.168614		C12ORF73	0.000146951	0.182908		CHPT1	8.94933e-05	0.188648		NIF3L1	8.13249e-06	0.21453
SUMF2	0.000880443	0.160766		UBL4A	0.000798249	0.162635		SLC25A10	0.000500304	0.16793		C12ORF10	0.00015282	0.182873		MRPS27	9.39887e-05	0.188088		SPR	8.03611e-06	0.214402
OSGIN1	0.000869227	0.160749		CCNB1	0.000762843	0.162473		MVK	0.000534822	0.167078		RHNO1	0.00015654	0.182164		WDR41	0.000102022	0.187366		CHPT1	1.01446e-05	0.212048
MDM2	0.000957562	0.159646		KCNIP4	0.000786001	0.162079		POLD2	0.00056793	0.166307		DDX47	0.000171916	0.181478		TMEM167A	0.000106024	0.186706		TUFM	1.11771e-05	0.211796
TBCA	0.000951826	0.15954		ERGIC3	0.000859726	0.16146		NDUFA9	0.000580131	0.166034		EIF6	0.000176055	0.181406		CITED2	0.000113055	0.185965		TUBA1C	1.09371e-05	0.211283
FUK	0.00107771	0.159366		LBX2	0.000841994	0.161171		C16ORF70	0.000658513	0.165751		EXOSC5	0.000180673	0.180466		DNAJB9	0.00011668	0.185599		POT1	1.16296e-05	0.211144
LPCAT3	0.000991042	0.159		ANXA13	0.000872815	0.160694		NECAB3	0.000599742	0.165605		GPX4	0.000192661	0.179699		PAQR9	0.000125518	0.184752		NDUFA9	1.17485e-05	0.210552
PRDM7	0.00101848	0.158634		BIRC5	0.000921258	0.159976		HOXC10	0.000781498	0.165265		KRT25	0.000202171	0.179123		CLPTM1L	0.000128023	0.184736		LSM5	1.18097e-05	0.210499
DPYSL5	0.00112896	0.157245		BLVRB	0.000939322	0.159717		COQ9	0.000618333	0.165211		TXNL4B	0.000206463	0.178871		KCNK3	0.000137023	0.183728		C16ORF91	1.28382e-05	0.210373
SNX10	0.00118275	0.156614		RPS7	0.000948285	0.15959		ILVBL	0.000619632	0.165183		TBCA	0.000206464	0.178871		CNNM4	0.000145238	0.183687		SMIM20	1.28305e-05	0.209649
SRD5A3	0.00126712	0.155857		RPL39	0.000954051	0.159509		STAG3L4	0.00063718	0.164822		BRI3	0.000223186	0.178348		PKP2	0.000138799	0.183578		NDUFA5	1.31892e-05	0.209366
TRIAP1	0.00132485	0.155065		DTYMK	0.000998785	0.158896		PEX5	0.000684846	0.164653		MRPS7	0.00021961	0.178336		TTI1	0.000161888	0.18348		CLDN12	1.51873e-05	0.208633
ANXA4	0.00133182	0.154993		TBCA	0.00100806	0.158772		MRPL42	0.000649747	0.164568		PRR4	0.000216718	0.178288		MAGT1	0.000159637	0.18257		EDEM2	1.56627e-05	0.208071
HOXA10	0.00136005	0.154705		OSGIN1	0.001047	0.158262		BIVM	0.000663134	0.164495		TAF9	0.000233355	0.177395		TMEM64	0.000166712	0.18142		SLC35C2	1.71387e-05	0.207373
IKBIP	0.00144456	0.154598		SPRR4	0.00105396	0.158173		ATP5B	0.00067496	0.164073		ZIC4	0.000235208	0.1773		METTL9	0.000183058	0.18073		ADCK2	1.77871e-05	0.206744
CDK7	0.0013863	0.154442		OGFOD2	0.00112349	0.157679		ISOC2	0.000699175	0.163614		RNF181	0.000248935	0.176612		C12ORF29	0.000181719	0.180397		CHCHD3	1.77137e-05	0.206309
TMEM9	0.00144184	0.154442		DEPDC1B	0.00112234	0.157325		CHPT1	0.00072975	0.163054		AHCY	0.000251897	0.176468		PRDX4	0.000185617	0.180144		TMEM5	1.81569e-05	0.206289
ALG8	0.00141709	0.15414		C1ORF53	0.0011234	0.157312		NFS1	0.000777134	0.162608		FAM136A	0.000254028	0.176366		SLC2A13	0.000188319	0.179972		COX6A1	1.77727e-05	0.206274
SHMT2	0.00147389	0.153776		MRPL13	0.0011549	0.156937		ATP6V0A1	0.000773499	0.16229		MYDGF	0.000262747	0.175955		DPYSL5	0.000193172	0.179668		MAGOHB	1.80502e-05	0.206112
MRPS35	0.00148605	0.153483		AHCY	0.00116489	0.15682		RNF185	0.000834076	0.162244		TBCE	0.000278458	0.175654		RHPN2	0.000212188	0.179378		GFM2	1.82329e-05	0.206007
TRIB3	0.00158107	0.152623		SPR	0.0011703	0.156758		ARHGEF16	0.000812395	0.161644		YARS2	0.000275566	0.175577		UNC79	0.000198778	0.179326		MLF2	1.95924e-05	0.205969
MCMDC2	0.00166882	0.15187		LCA5L	0.0011958	0.156465		HAGH	0.000846248	0.161292		SPIRE2	0.000274719	0.175411		TRIQK	0.000203854	0.179023		UBL4A	2.01019e-05	0.205938
FAM136A	0.00169473	0.151654		SPNS1	0.00126653	0.156229		SLC2A4RG	0.000884806	0.160513		FTL	0.000280664	0.175149		PGRMC1	0.000209959	0.178669		CKS2	1.85324e-05	0.205837
GHSR	0.00170831	0.151543		NOX1	0.00121713	0.156224		RAB17	0.000895627	0.160352		MRPS12	0.000284558	0.17498		IARS2	0.000255914	0.178573		MCCC2	1.90382e-05	0.205793
TPK1	0.00173327	0.15134		TRAP1	0.00132728	0.155952		METTL9	0.000922646	0.16033		MLF2	0.000305308	0.174726		C17ORF58	0.00022122	0.17804		NDUFAF5	1.88762e-05	0.205644
SIRPA	0.00202889	0.15107		NEK2	0.0012437	0.15593		PRKAB1	0.000913762	0.160085		SLC35B1	0.000299805	0.174339		XPR1	0.000229775	0.177996		UNG	2.08544e-05	0.205072
PUS7	0.00198032	0.150341		KCNK2	0.00124783	0.155884		FABP3	0.000922441	0.159959		BAALC-AS2	0.000308559	0.173985		FASTKD3	0.000226078	0.177985		DIABLO	2.03041e-05	0.204879
C1RL	0.00189753	0.150065		CDK5	0.00126866	0.15584		DIABLO	0.000935157	0.159776		MLX	0.000336058	0.173944		SLCO4C1	0.000222383	0.177977		DTNB	2.08626e-05	0.204594
ARSB	0.00203337	0.149787		OIP5	0.00125895	0.155763		TCTN1	0.00099477	0.159696		STAG3L4	0.000320251	0.173526		DMGDH	0.000227918	0.17768		ACTR3C	2.09915e-05	0.204529
DRAM1	0.00210267	0.149661		LYRM5	0.00125936	0.155759		SIM1	0.000950026	0.159566		ATP5G2	0.000320448	0.173518		SNX5	0.000241221	0.177614		USP5	2.37885e-05	0.204153
NKAIN1	0.00197287	0.149514		MYBL2	0.00125957	0.155757		ABHD6	0.000955467	0.159489		LYRM1	0.000323152	0.173414		CCT5	0.000235257	0.177297		C7ORF73	2.25139e-05	0.20379
BHMT2	0.00203597	0.149068		CDK7	0.00126453	0.155703		HOXC4	0.000970533	0.15928		SPATS2	0.000347459	0.173324		ATG10	0.000239223	0.177095		TMBIM6	2.26226e-05	0.203739
APPL2	0.00215934	0.148751		PBK	0.00129371	0.155391		ACTR3C	0.00105309	0.158184		CERS2	0.00036841	0.173203		MTFR1	0.000239982	0.177056		CHCHD2	2.43954e-05	0.20294
CLDN12	0.00217712	0.148634		PIK3R2	0.00136263	0.155223		ZDHHC9	0.0010857	0.158142		DUS2	0.000359374	0.173106		BOD1	0.000240266	0.177042		C12ORF75	2.49166e-05	0.202715
GCNT3	0.00212867	0.148434		GALNS	0.00132363	0.155078		OXSM	0.00106967	0.157974		C1ORF53	0.000332631	0.173057		AMACR	0.000249266	0.176596		AAAS	2.7953e-05	0.202193
CITED2	0.00217076	0.148154		FDXR	0.00133536	0.154957		ACSM5	0.00112674	0.157272		CDKN2AIPNL	0.000332812	0.17305		WRB	0.000301862	0.17569		COQ5	2.68645e-05	0.201914
ZBED6CL	0.00218267	0.148076		CKS2	0.00134372	0.154871		SLC25A11	0.00119666	0.156821		MXD3	0.000340927	0.172751		TMEM198	0.000273725	0.175455		MRPS33	2.90156e-05	0.201091
SERINC2	0.00225085	0.147636		WBP1	0.00142339	0.15462		TRPV4	0.00117029	0.156758		PTK6	0.000341129	0.172744		C1ORF43	0.000280052	0.175175		WDR12	3.04933e-05	0.201024
PLPPR5	0.00230755	0.147279		FAM86C2P	0.00159308	0.154514		PTDSS2	0.00120626	0.156529		TBL2	0.00035276	0.172528		ARSB	0.000306262	0.174892		ORC5	3.0909e-05	0.200413
SGCZ	0.00232255	0.147185		PKMYT1	0.00140864	0.154222		STK16	0.00127706	0.156299		EIF2S2	0.000369387	0.172356		FAM173B	0.000287226	0.174865		POP4	3.0927e-05	0.200406
CLCN7	0.0023558	0.146981		MAGOHB	0.00143252	0.15399		SLC9A3R1	0.001233	0.15623		MIF4GD	0.000383096	0.172304		CCDC125	0.00029778	0.174625		NUP37	3.20535e-05	0.200253
PPT1	0.00266154	0.146942		TUBA1C	0.00143904	0.153927		DHCR24	0.00122582	0.156127		IAH1	0.000359261	0.1721		METTL2A	0.000302407	0.174436		DUS4L	3.1965e-05	0.200051
NR1H4	0.00239598	0.146737		XRCC6BP1	0.00151456	0.153759		DECR2	0.00123158	0.156063		TPK1	0.000362277	0.171996		HMGCR	0.000320463	0.173518		TMEM147	3.24664e-05	0.199884
PPAT	0.00243821	0.146657		C2ORF70	0.00149682	0.153383		FASTKD3	0.00125326	0.156007		CDK5	0.000375876	0.171736		RITA1	0.000342636	0.173498		SLC25A15	3.52115e-05	0.199007
TKFC	0.00251552	0.146549		TMEM205	0.0015085	0.153275		KLC4	0.001343	0.155789		COASY	0.000410361	0.171236		NECAP1	0.000353768	0.173303		IAH1	3.59302e-05	0.198788
PTP4A1	0.00251639	0.146029		SFN	0.00153397	0.153043		GRINA	0.00141252	0.155459		HINT1	0.000389576	0.171089		SMYD5	0.000351416	0.17298		DNAH3	3.62077e-05	0.198705
POLD2	0.00253095	0.145946		C7ORF73	0.00154435	0.15295		MSRB1	0.00130843	0.155236		NAGPA	0.000415131	0.170889		RBBP9	0.000364314	0.172935		PRR13	4.06934e-05	0.197435
AHCY	0.00255983	0.145781		CCNB2	0.00157403	0.152685		FAM86C2P	0.00154115	0.15498		APOC4	0.000401203	0.17072		TMED2	0.000341722	0.172924		MRPS12	4.10741e-05	0.197334
WDR12	0.00262108	0.145779		METTL23	0.00157578	0.15267		PDF	0.0013457	0.154851		MRPS27	0.000405445	0.170588		PDIA6	0.000351092	0.172789		GET4	4.3391e-05	0.196962
NEFM	0.00264483	0.145307		CDC20	0.00161034	0.152368		TRAP1	0.00144217	0.154803		MMAB	0.000409381	0.170467		TMEM135	0.000341243	0.17274		BCAT2	4.433e-05	0.196956
RAD17	0.00272664	0.145203		METTL7B	0.00161147	0.152358		TXNRD2	0.00138553	0.15445		DNAJA3	0.000438186	0.170406		XPOT	0.000350548	0.172607		TLCD1	4.28994e-05	0.196859
GUSB	0.00277956	0.145092		FLAD1	0.00169293	0.152203		UBE3B	0.00160564	0.154218		COX14	0.000420629	0.170126		BCKDHA	0.00037517	0.172566		EPDR1	4.3441e-05	0.196721
MUC12	0.0027171	0.144915		TAF9	0.00164957	0.152032		TMBIM4	0.00145178	0.153806		UQCC1	0.000420638	0.170126		KIAA0895	0.000367189	0.172229		CTSA	4.52349e-05	0.196278
MLST8	0.00285579	0.144695		FKBP4	0.00164967	0.152031		CERS4	0.00146927	0.15364		ASNS	0.000432222	0.169784		TUBA1C	0.000361116	0.172036		ERGIC3	4.90109e-05	0.196079
UNC79	0.00276616	0.144653		CHCHD5	0.00168162	0.151763		VRK3	0.00155819	0.153363		TBRG4	0.000454824	0.169733		SMIM15	0.000369262	0.171958		RITA1	5.08774e-05	0.195894
FDXR	0.00276631	0.144653		F13B	0.00170005	0.151611		ALDH1A1	0.00150338	0.153323		CEP72	0.000444807	0.169619		VPS33A	0.000393553	0.171561		FLAD1	5.01459e-05	0.195826
SLC4A2	0.00290657	0.144436		MPST	0.0017216	0.151434		EARS2	0.0015691	0.152907		RPLP0	0.000445304	0.169407		M6PR	0.000400288	0.171348		C20ORF24	4.73551e-05	0.195775
TRIM36	0.00284193	0.144258		TRUB2	0.00177495	0.151183		COASY	0.00171049	0.152237		MAGEB16	0.000447324	0.16935		DERA	0.000383911	0.171272		PRDX6	4.77426e-05	0.195685
NOL4	0.00287201	0.144104		EIF6	0.00187516	0.150762		CERS2	0.00178266	0.152194		DDIT3	0.000463173	0.168909		SSX2IP	0.000402875	0.170668		POLD2	4.8835e-05	0.195436
TMEM209	0.00294386	0.144079		SF3B6	0.00185254	0.150756		TMX2	0.0017147	0.15149		TRAF4	0.000470749	0.168704		TARS2	0.000444251	0.170633		RPL39	4.89752e-05	0.195405
MYBL2	0.0029409	0.143757		IQCH	0.00183453	0.150542		NABP2	0.00180403	0.151131		TUBA1C	0.000475062	0.168588		CDK7	0.000410683	0.170427		CDK4	4.92583e-05	0.195341
MAPK6	0.00303061	0.143483		MUC12	0.00183618	0.150529		ETFA	0.00176176	0.151111		C16ORF70	0.000537471	0.168392		ATP5B	0.000416596	0.170247		SNHG11	5.04283e-05	0.195082
SCD	0.00304452	0.143248		CENPA	0.00184877	0.150433		CECR5	0.00190114	0.150922		FLAD1	0.000506548	0.16836		AGBL5	0.000433692	0.170137		PGAM5	5.47224e-05	0.194856
GLMP	0.00312907	0.142844		NRSN2	0.00187865	0.150382		PHB2	0.00180272	0.150788		BLOC1S2	0.000504817	0.167815		POT1	0.000445176	0.169807		SLC35E3	5.17938e-05	0.194787
SH3BGRL2	0.00324278	0.142818		C16ORF91	0.0019311	0.150345		AP1M2	0.00183382	0.150547		MRPS33	0.000509632	0.167694		MBTPS2	0.000436006	0.169674		RFC5	5.70274e-05	0.194624
CNOT11	0.00319395	0.142707		COA5	0.0018879	0.150137		GABRR3	0.00188244	0.150178		PRELID1	0.000521957	0.167389		RNF141	0.000443699	0.169453		ZBED6CL	5.37596e-05	0.194375
RPF2	0.00330279	0.14221		RPS23	0.00190648	0.149999		ACSS2	0.00188957	0.150125		CCDC125	0.000538664	0.167181		ANXA4	0.000445951	0.169389		TSFM	5.40787e-05	0.194309
RNASE2	0.00327156	0.142185		CLDN12	0.00206478	0.149392		ACMSD	0.00189889	0.150055		VPS33A	0.000572447	0.166789		SMG8	0.000587951	0.169245		SQSTM1	5.55253e-05	0.194017
XRCC6BP1	0.00339448	0.142137		COA4	0.00199732	0.14934		CUX1	0.00195671	0.149806		TMEM167A	0.000547137	0.166786		SLC35E1	0.000479346	0.169065		PDF	5.70167e-05	0.193722
DHX32	0.00352751	0.141896		RFC2	0.00205573	0.149279		BCKDHA	0.00210437	0.149472		METTL23	0.0005551	0.166601		STARD3NL	0.000478806	0.168882		RAB26	5.78123e-05	0.193568
AMACR	0.0034491	0.1414		CCT5	0.00202797	0.149124		COQ6	0.00204939	0.149323		EXOSC1	0.000567816	0.16631		HMGCS1	0.000472984	0.168644		ATP5G2	5.7944e-05	0.193543
TMTC4	0.00344915	0.1414		GUSB	0.00211222	0.149067		SPIRE2	0.00201482	0.149216		MIP	0.000574177	0.166166		SMPDL3A	0.000474774	0.168596		MRPS17	5.79502e-05	0.193542
FAM35BP	0.00345971	0.141354		MRPL36	0.00204673	0.148993		SEPHS2	0.00204837	0.148981		EYA1	0.000579101	0.166057		SCAMP1	0.000491744	0.168149		TFB2M	6.17762e-05	0.193503
KIAA0101	0.00348041	0.141265		SETD9	0.00205957	0.148904		ECH1	0.0020754	0.148969		NDUFAF5	0.000590684	0.165801		PPAT	0.000503429	0.168046		KLHL12	5.83578e-05	0.193464
C12ORF29	0.00348514	0.141245		SMN2	0.00215811	0.148585		PIK3R2	0.00213566	0.148909		DHX32	0.000636915	0.165795		ENPEP	0.000500948	0.167913		2019-09-03	5.85827e-05	0.193421
SMIM15	0.00355488	0.141114		HHLA3	0.00212288	0.148473		SHMT2	0.00211519	0.148698		CISD1	0.000595816	0.16569		PGK1	0.000529259	0.167602		ORMDL2	5.96382e-05	0.193222
METTL15	0.00375517	0.140622		PASD1	0.00212987	0.148426		CRIP3	0.00209733	0.148645		TRIP13	0.000607597	0.165437		EPRS	0.000577284	0.167467		DDX28	6.11209e-05	0.193172
KDELR2	0.00364063	0.140593		MAPKAPK3	0.00214722	0.14831		CRADD	0.0020996	0.14863		SHMT2	0.000617916	0.165412		TPD52	0.000519499	0.167449		CCNB1	6.00171e-05	0.193152
SMYD5	0.0037851	0.140503		DRAM1	0.00232771	0.148196		UBXN6	0.0022075	0.14861		MRPS34	0.000617518	0.165228		DNAH3	0.000527953	0.167243		HTATIP2	6.03948e-05	0.193082
ALDH1A1	0.0036911	0.140386		PYCRL	0.00218617	0.148053		LYRM5	0.00211084	0.148554		USP5	0.000655774	0.16522		MRPS30	0.000531691	0.167153		NDUFB2	6.10882e-05	0.192955
TCTN2	0.00386778	0.140342		TMEM198	0.00219239	0.148012		UQCC1	0.0021744	0.14813		DHX37	0.000696366	0.165213		ALG6	0.000584932	0.166902		OSGIN1	6.12437e-05	0.192926
GREB1	0.00373302	0.140217		AMDHD2	0.00222306	0.147814		ACSM2A	0.00218512	0.14806		SSR4	0.000629388	0.164981		ACMSD	0.000543166	0.166879		NDUFA4	6.15122e-05	0.192877
ADGRB2	0.00375638	0.140123		CDKN2A	0.00224828	0.147652		HYAL1	0.00220731	0.147915		HIST1H2AE	0.000630136	0.164966		GCLM	0.000549042	0.166741		GLMP	6.33183e-05	0.192554
DGCR6	0.00380466	0.139932		FOXM1	0.00227059	0.14751		RSAD1	0.00231423	0.147582		C17ORF58	0.000634178	0.164883		NLN	0.000560851	0.166468		FAM155B	6.3441e-05	0.192533
RBKS	0.0038824	0.139627		ICT1	0.00227066	0.14751		TMEM19	0.00229808	0.147338		UBL4A	0.000684505	0.164659		B3GALNT1	0.000561018	0.166464		CS	6.37039e-05	0.192486
RHOT1	0.00409987	0.139458		KNSTRN	0.00228768	0.147403		LRRK2	0.00230346	0.147304		FAAP24	0.000659116	0.164382		MC3R	0.000580388	0.166028		C2ORF70	6.42502e-05	0.192391
FKBP4	0.00396736	0.139301		CCDC125	0.0023408	0.147245		PEBP1	0.00232614	0.147163		COX6A1	0.000659604	0.164373		TMEM200A	0.000593566	0.165739		MRPS24	6.52377e-05	0.19222
SLC19A1	0.00399966	0.139178		CAMK2N2	0.002323	0.147183		DUS2	0.00253815	0.146764		EIF2B1	0.000746015	0.164109		KCNH6	0.00059494	0.165709		SSBP1	6.60094e-05	0.192088
ZC3HC1	0.00409888	0.139134		TMEM115	0.00347981	0.146867		TBRG4	0.00254027	0.146406		DIABLO	0.000676301	0.164048		CGREF1	0.000594975	0.165708		MMAB	6.74824e-05	0.191841
M6PR	0.00422575	0.138833		ZCCHC9	0.00243712	0.146663		NDUFA5	0.00246872	0.146306		SFXN4	0.00068708	0.163842		SLC33A1	0.000607142	0.165447		C19ORF48	6.77908e-05	0.19179
COQ5	0.00415099	0.138616		TSEN54	0.00249709	0.146655		SLC39A5	0.00248991	0.146182		XPOT	0.00070207	0.163751		RBKS	0.000657329	0.164418		BOLA3	6.81471e-05	0.191731
USP45	0.00424857	0.138588		TCHHL1	0.0024134	0.146633		BBS2	0.00282215	0.146077		IMP4	0.000731811	0.16359		NDFIP2	0.000668104	0.164398		APOA1BP	6.85465e-05	0.191665
TMEM163	0.00418923	0.138477		MRPS36	0.00242307	0.146575		TARBP2	0.00252467	0.145982		GFM2	0.000707355	0.163462		HSPA13	0.000676802	0.164229		WBSCR16	7.47783e-05	0.191352
KCNK3	0.00422552	0.138346		GPRC5C	0.00251276	0.146564		ADAL	0.00259848	0.145564		YIF1A	0.000713041	0.163357		METTL15	0.000712755	0.163937		TWF1	7.26553e-05	0.191011
ACTR3B	0.00427754	0.13816		GET4	0.00248369	0.146389		C4ORF19	0.0027037	0.144986		F13B	0.000713422	0.16335		TMEM161B	0.000695354	0.163685		NIPSNAP1	7.33401e-05	0.190905
GFM2	0.0042851	0.138134		TMEM208	0.00245566	0.146382		AAAS	0.00284064	0.144773		TRAF7	0.000766456	0.163173		PRUNE	0.00073304	0.163186		RPN2	7.76991e-05	0.190474
CECR5	0.00459067	0.137891		RFNG	0.00255898	0.1463		POLDIP2	0.00285949	0.144676		METTL22	0.000771514	0.162894		GNPDA1	0.000757273	0.162569		ZDHHC4	7.77261e-05	0.19047
SLC25A13	0.00441762	0.137831		DPYSL5	0.00248672	0.146201		PMPCA	0.00287367	0.144604		RPL37	0.000747686	0.162736		TRIM23	0.000772276	0.162501		MFSD5	7.78601e-05	0.19023
TMEM144	0.00438196	0.137793		PHB2	0.0024962	0.146146		PDCD6	0.00278935	0.144532		MPST	0.000750151	0.162693		ANO6	0.000795176	0.162495		TMEM177	7.86771e-05	0.190111
ABCC12	0.00438656	0.137777		NDUFA9	0.00251451	0.14604		IDH3B	0.00292473	0.144515		OTX1	0.000755208	0.162605		DAB2	0.000962129	0.161868		OGFOD2	8.40938e-05	0.189797
CCNB1	0.00442884	0.137631		GAA	0.00260731	0.146027		LLGL2	0.00282833	0.144329		PSMD9	0.000792547	0.162539		TMTC3	0.00081093	0.161856		HM13	8.41157e-05	0.189354
DRGX	0.0044317	0.137621		IKBIP	0.00264486	0.14599		TMEM205	0.00286368	0.144147		NIPSNAP1	0.000760819	0.162508		POMT2	0.000963612	0.161847		STRAP	8.81421e-05	0.188822
PSPH	0.00453826	0.137258		PYM1	0.0025236	0.145988		GLYR1	0.0031975	0.143364		PIR	0.000768877	0.162369		TMEM106B	0.000809051	0.161698		FAHD2A	8.95682e-05	0.188639
PIR	0.00465562	0.136868		OR4C15	0.00253937	0.145897		TRUB2	0.00305942	0.143343		TMEM5	0.000785415	0.162278		NFS1	0.000839827	0.161582		CLCN7	9.02886e-05	0.188547
POLDIP2	0.00480512	0.136863		GINS2	0.00256419	0.145757		CLDN12	0.00316152	0.143194		TMEM41A	0.00077895	0.162198		TMED10	0.000953077	0.161415		TXNL4B	9.10787e-05	0.188448
ACTR3C	0.00471154	0.136684		AUP1	0.00269241	0.145558		SLC12A7	0.00314754	0.143092		LMAN2	0.000838232	0.161797		DENND5B	0.000847762	0.161269		MAPKAPK3	9.10868e-05	0.188447
ARMC10	0.00474603	0.136572		CLCN7	0.00264219	0.145321		VPS9D1	0.00308175	0.143069		NACA	0.000803896	0.161783		PDK1	0.000909182	0.160904		ATRAID	9.11602e-05	0.188438
PDIA4	0.00480386	0.136386		RITA1	0.00282097	0.145046		USP5	0.00322493	0.143068		UBE2T	0.000804954	0.161765		TMEM106C	0.000867119	0.160781		CERS2	0.000104517	0.188406
FOXM1	0.00484566	0.136253		SEC14L3	0.00275526	0.144711		DHODH	0.00322358	0.142906		RPL26L1	0.000814391	0.161612		OSMR	0.000871385	0.160716		PPHLN1	9.41448e-05	0.188288
ITGB8	0.00487886	0.136148		MTX1	0.00283693	0.144453		MLF2	0.00324342	0.142815		PDF	0.000816312	0.16158		SMO	0.000872739	0.160696		NFS1	9.76161e-05	0.188092
PRDX4	0.00493828	0.135961		ACTR1B	0.0030479	0.144417		UNG	0.00321122	0.142795		TCTN3	0.00096376	0.161457		MOCS3	0.00100955	0.160063		C12ORF66	9.94509e-05	0.187878
METTL2A	0.00499249	0.135952		KISS1R	0.00282752	0.144333		SDC4	0.00315947	0.142701		SLC25A19	0.000830556	0.161352		SLC4A2	0.000981277	0.159692		ALG8	9.62718e-05	0.187814
HM13	0.00500589	0.135752		SPIRE2	0.00287137	0.144108		BSG	0.00317031	0.14265		GPR35	0.000831678	0.161334		RNF41	0.000982721	0.159485		GRIP1	9.71608e-05	0.187708
AGBL5	0.0051282	0.135696		ANXA4	0.00291351	0.143894		VEPH1	0.00320097	0.142508		RBKS	0.000832985	0.161313		GOLPH3L	0.000976414	0.159385		GSTK1	9.77877e-05	0.187635
RPA3	0.00508315	0.135515		FUT9	0.00296279	0.143648		KLHDC2	0.00331447	0.142492		PRSS36	0.000843125	0.161153		FAM234B	0.000971187	0.159271		TRAP1	0.000107815	0.187604
CHEK2	0.00509513	0.135479		MCHR2	0.00297627	0.143581		HADHB	0.00323812	0.142337		LINC00493	0.000843326	0.16115		ALG8	0.000989381	0.159023		CUX1	0.000103609	0.187188
TRAPPC13	0.00518953	0.135195		SLC50A1	0.00299125	0.143507		CISD3	0.00327515	0.142335		PRR13	0.000846306	0.161103		COX11	0.000989485	0.159021		CDK16	0.000109216	0.187015
NACAP1	0.00526065	0.134984		EMD	0.00309986	0.143486		DAB2	0.00379582	0.142143		ALDOA	0.000885258	0.161071		MTIF2	0.00109251	0.158058		WBSCR28	0.000107118	0.186587
PRTN3	0.00533321	0.134771		FASTKD3	0.00305406	0.143369		PCYT2	0.00332451	0.141947		FTH1	0.000867088	0.160782		MTDH	0.00112387	0.158045		CXORF40A	0.000113802	0.186539
XPR1	0.00562459	0.134257		DHODH	0.00313284	0.143329		COX6A1	0.00333993	0.141878		NMRAL1	0.000882065	0.160554		PXMP2	0.0010663	0.158017		CCDC51	0.000107919	0.186501
HOXA9	0.00558035	0.134065		C7ORF50	0.00303478	0.143295		NARFL	0.00348376	0.141582		DESI1	0.000883955	0.160526		CFAP47	0.0010728	0.157934		LONP1	0.000116606	0.186256
CFAP47	0.00570193	0.133729		TSSC1	0.00317844	0.143115		FAM86EP	0.00348715	0.141568		BNIP1	0.000884516	0.160518		TCTN3	0.00125897	0.1578		TMED2	0.000113719	0.186113
TUBA1C	0.00572118	0.133676		YBX2	0.00312252	0.142875		MRPS36	0.00344529	0.141416		C17ORF89	0.000901696	0.160262		MAPK6	0.00109902	0.157793		GTF2IRD1	0.000118194	0.186099
CORO1C	0.00627389	0.133641		TNNT1	0.00313966	0.142794		OCEL1	0.00345873	0.141358		MRPL55	0.000925856	0.15991		PRELID3B	0.00109776	0.157624		BUD31	0.000112388	0.186033
TYMSOS	0.00581417	0.133424		ALG8	0.00315281	0.142732		PSMD9	0.00360854	0.141221		MRPS24	0.000933191	0.159804		FAM19A2	0.00110069	0.157588		PAK4	0.000121385	0.186006
CCT5	0.00583841	0.133358		C12ORF10	0.00322903	0.142713		SPATA2	0.00377548	0.14104		GLRX3	0.000944143	0.159649		RAD1	0.00113421	0.15755		RHNO1	0.000113141	0.185956
ANXA13	0.00586085	0.133298		MRPL38	0.00322826	0.142549		NDUFA10	0.00383923	0.140954		ATP6V1E2	0.000944893	0.159638		SEC23B	0.00113504	0.157356		SLC35B1	0.000114992	0.185768
QPRT	0.00590893	0.13317		DCXR	0.00320441	0.142492		ESRRA	0.00356514	0.140906		AUP1	0.00100502	0.159371		TAF9	0.00112735	0.157264		PSAT1	0.000115228	0.185744
GCHFR	0.00594743	0.133068		CTH	0.00322272	0.142408		GTF2IRD1	0.00369166	0.140879		PSMA7	0.000970321	0.159283		CMBL	0.00113014	0.157231		TMEM161A	0.000121877	0.185741
MLEC	0.00595488	0.133048		TUFM	0.00333701	0.142391		COX14	0.00359167	0.140795		GSTA5	0.000970833	0.159276		PLEKHA8	0.00116286	0.157211		CMAS	0.000115927	0.185674
BIRC5	0.00595987	0.133035		PPP2R4	0.00326443	0.142217		C14ORF79	0.00376771	0.140572		PSAT1	0.00097309	0.159245		PUS7	0.00123298	0.156966		OR5I1	0.00012138	0.185141
DEPDC1	0.00598381	0.132972		MMAB	0.00330328	0.142042		OSGIN1	0.00368012	0.140431		MRPL51	0.000989192	0.159211		PIK3R2	0.00122312	0.156706		SLC25A3	0.000126824	0.184631
ANKRD7	0.00599729	0.132937		TSGA13	0.00334832	0.141841		WRB	0.00397596	0.140422		LRRC23	0.000980124	0.159149		C1GALT1	0.00120822	0.156507		GTF3C2	0.000159577	0.184526
IL27RA	0.0062232	0.132354		PRDM7	0.00335015	0.141833		STX3	0.00373207	0.140221		NDUFA9	0.000984148	0.159094		KCNK2	0.00120892	0.156316		ATP5B	0.000128687	0.184461
DEPDC1B	0.00622472	0.132351		SAPCD2	0.00335039	0.141832		TRAF4	0.00373931	0.140192		PCBD1	0.000988659	0.159032		FAF2	0.00131674	0.156246		TSSC1	0.000137621	0.18432
KCNC2	0.00624359	0.132303		OR4F4	0.00335603	0.141807		WWC1	0.0037758	0.140046		PLIN3	0.000989021	0.159028		RAD21L1	0.00121967	0.156196		PCBD1	0.000132204	0.184147
TTYH3	0.00632751	0.132092		CENPM	0.00339814	0.141621		ASL	0.00377635	0.140044		TIMM50	0.000993153	0.158972		LAMP2	0.00122017	0.15619		ATP5G3	0.000133661	0.184019
ASPH	0.00652353	0.131763		S100A10	0.00348705	0.141237		SLC37A4	0.0038008	0.139947		RPL39	0.00100329	0.158836		ASPH	0.00124059	0.156146		MRPL15	0.000134777	0.183922
EDEM2	0.00659938	0.131734		GINS1	0.00349295	0.141211		ST7	0.0038325	0.139822		MFSD5	0.00101231	0.158715		ACTR3B	0.00124564	0.155908		ATP5G1	0.000137814	0.183661
KRT25	0.00653089	0.131591		FAM207A	0.00353726	0.141023		USP30	0.00396589	0.139798		TMEM258	0.00103187	0.158643		FZD6	0.00126921	0.155652		MANBAL	0.00013786	0.183657
TK1	0.00653538	0.13158		C20ORF195	0.00353816	0.14102		FUK	0.00419863	0.139757		DGCR6	0.00101816	0.158638		TARS	0.00130478	0.155638		CHCHD5	0.000141106	0.183385
LTBR	0.00686271	0.131575		NAE1	0.00362483	0.140988		FUT9	0.00387727	0.139647		MVK	0.00101919	0.158624		NARS2	0.00131011	0.155582		LDHB	0.000143382	0.183197
GNPDA1	0.00658815	0.131452		POLDIP2	0.00366652	0.140982		DPYSL5	0.00387939	0.139639		RPL13A	0.00102149	0.158594		PNO1	0.00129794	0.155528		SDC4	0.000144387	0.183115
CCNA2	0.00659454	0.131437		TARS2	0.00380856	0.140908		FAM229B	0.00398546	0.139395		GAPDH	0.00105098	0.158396		KLHDC2	0.0013785	0.155063		AMZ2	0.000148277	0.182803
NEU1	0.00661469	0.131389		NARFL	0.00368185	0.140753		SPNS1	0.00409917	0.139296		DNAH3	0.00104279	0.158317		ILF2	0.00134592	0.155029		TARS2	0.000165947	0.182752
AMDHD2	0.00666653	0.131265		GFM2	0.0036214	0.140672		GSS	0.00397352	0.139277		ST20	0.00104637	0.158271		MRPL30	0.00134841	0.154823		GARS	0.000152219	0.182494
EYA1	0.00668373	0.131224		LTBR	0.00383897	0.140621		TACO1	0.00399929	0.13918		RPL38	0.00105225	0.158195		TBCA	0.0013496	0.154811		TMEM209	0.000164514	0.182
ATP8B3	0.00669674	0.131193		GDF15	0.00363602	0.140612		TMEM177	0.00404288	0.139016		ZFYVE27	0.00110564	0.158081		RNF128	0.00135345	0.154772		ERP29	0.00016625	0.181453
TMEM182	0.00673603	0.1311		WBSCR22	0.00372422	0.140582		GLIS2	0.00409403	0.138988		PITX1	0.00106397	0.158046		NELFCD	0.00142771	0.15476		NDUFAB1	0.000168623	0.181285
RINT1	0.00681806	0.13106		ANKRA2	0.00382484	0.140345		CPT2	0.00406825	0.138921		ENY2	0.00121164	0.157764		KRT80	0.0013591	0.154715		CYCS	0.000171629	0.181076
PON2	0.00678103	0.130994		ERCC2	0.00380062	0.140276		FAM186B	0.00411941	0.138732		TMEM120A	0.00111909	0.157548		C2ORF70	0.00136663	0.154639		WSB2	0.000178136	0.180634
PAPD4	0.00692878	0.130957		SLC12A7	0.0038231	0.140187		UGT1A6	0.00416029	0.138582		DDRGK1	0.00115593	0.157477		SPATA17	0.00137317	0.154573		ALG1	0.000190178	0.180484
OSR1	0.00679771	0.130955		ERI3	0.00376256	0.140099		RHBDD2	0.00417145	0.138542		NARFL	0.00115513	0.157302		CECR5	0.00151657	0.154103		DCTPP1	0.000181027	0.180442
DNAH3	0.0068097	0.130927		PCNA	0.00385496	0.140062		CACFD1	0.00422425	0.138351		GAA	0.0011712	0.157298		ABHD6	0.00142606	0.154053		TMEM41A	0.000185375	0.18016
KIAA0895	0.00695396	0.130899		GBAP1	0.00377622	0.140044		QSOX2	0.00466943	0.138121		ORC5	0.00113022	0.15723		NIPSNAP1	0.00142873	0.154027		RINT1	0.000188928	0.180142
