# Supplementary material for: Exosome component 1 cleaves single-stranded DNA and sensitizes human kidney renal clear cell carcinoma cells to poly(ADP-ribose) polymerase inhibitor
Source: eLife. 2021 Jun 23;10:e69454. doi: 10.7554/eLife.69454 (PMC8260222; doi:10.7554/eLife.69454)
Supplement: Supplementary file 2. [file elife-69454-supp2.xlsx]

## Sheet: Supplementary File 2
A>C/T>G				A>G/T>C				A>T/T>A				C>A/G>T				C>G/G>C				C>T/G>A
Gene	P value	FC(High mut/ Low mut)		Gene	P value	FC(High mut/ Low mut)		Gene	P value	FC(High mut/ Low mut)		Gene	P value	FC(High mut/ Low mut)		Gene	P value	FC(High mut/ Low mut)		Gene	P value	FC(High mut/ Low mut)
ZNF154	1.16603e-05	0.705248		H2BFWT	0.00367681	4.49556		CHRNA4	0.00880809	3.7166		OR2AG3	0.00657541	5.76727		PTH	0.00332089	3.32409		DEFB1	0.00910949	5.06523
BIVM	2.21706e-05	1.2693		MRGPRX1	0.0103203	4.35792		TEX40	0.00690335	2.57905		LOC158935	0.00636186	4.59462		CPSF4L	0.00134236	2.66511		REEP2	0.0105102	3.73617
KCNK2	0.00012107	2.53947		PMCHL2	0.0019821	3.84971		TRPC2	0.00584828	2.24585		LINC01559	0.00347418	4.35776		CXorf22	0.00251012	2.51816		GSG1	0.00760964	3.10277
SLC35E3	0.000130176	1.21515		UBQLN3	0.00557408	2.84659		UGT2B11	0.00170792	2.18003		BCAS1	0.00580908	4.27685		LOC158730	0.00288213	2.39476		NEB	0.00357073	3.03671
TM7SF3	0.000151127	1.242		DRC7	0.000761624	2.57846		LOC51180	0.00303527	2.16345		COL6A5	0.00912823	3.46003		LOC101930033	0.00567762	2.35859		SRRM3	0.0103858	2.93085
TMEM163	0.00016359	1.49587		WBSCR28	0.00854239	2.06598		LOC100421155	0.00847214	1.88897		LINC00488	0.0078164	3.11617		B3GALT5	0.00187993	2.2983		SCRA1	0.000483741	2.89536
LOC102724841	0.000201604	0.694674		CDKN2A-AS1	0.00236509	2.03214		LOC115357	0.0047757	1.74241		ADGRF4	0.00816952	2.88095		KCNK2	0.000228694	2.28894		DNAH3	0.00112235	2.86945
HEXB	0.000209789	1.26354		KCNK2	0.00334103	2.02345		OR2T2	0.00920736	1.72706		FGF5	0.00640519	2.62144		NPTX2	0.00365913	1.78091		LINC00488	0.00921311	2.77975
TCTN2	0.000213851	1.24915		CCDC38	0.00982844	1.80137		CCR6	0.00636977	1.60278		NCR2	0.00664443	2.58119		PCDHGA9	0.00520925	1.75768		CERS1	0.0065594	2.61975
NR2F1	0.00021655	0.67615		ACSM1	0.00557232	1.79462		RCAN1	0.00317016	1.59245		GPR15	0.00382337	2.5477		ILDR2	0.00461335	1.67011		FBXO2	0.00990914	2.59633
NFASC	0.000275339	0.694583		MOX1	0.00945293	1.77923		ALPL	0.00781761	1.55925		PHP	0.00965762	2.47079		DLX6	0.00486586	1.64993		ADGRF4	0.00783638	2.54537
LOC221882	0.000281211	1.27438		CILD2	0.00823296	1.57479		ANXA13	0.00643133	1.52733		TRPC2	0.00578632	2.32992		KRT80	0.00835779	1.63512		TRNP1	0.000986073	2.52481
NADK2	0.000316754	1.19798		ANXA13	0.00223824	1.55702		OCD1	0.00383743	1.46545		LINC00592	0.00323031	2.29937		GABRB3	0.00533091	1.57665		RAB26	0.00130255	2.51109
CCDC125	0.000318762	1.2355		LYG1	0.00366413	1.52892		SLC5A10	0.00409649	1.44753		SCRA1	0.00614412	2.20132		AVPR1B	0.00729728	1.56188		LOC133400	0.00987228	2.41413
GAA	0.000337293	1.28412		WDR66	0.00283269	1.51759		SLC39A5	0.00719089	1.43588		SRPX2	0.00509148	2.18022		PCDHB8	0.00741085	1.51882		MB	0.00869187	2.40752
PLCL1	0.000338398	0.676643		GRM5	0.00555966	1.5126		LOC155033	0.00537979	1.40681		SSC4D	0.00702365	2.03965		LOC115396	0.000111073	1.47502		NOL4	0.00830534	2.39334
ZNF256	0.00038769	0.845785		AMACR	0.00958112	1.39241		FLJ12983	0.00196708	1.38679		C1ORF105	0.000895634	1.99804		HAPLN1	0.00311345	1.43441		CKB	0.00753258	2.34845
MTRR	0.00045648	1.19851		LOC100133836	0.00954859	1.38101		PXMP2	0.00904076	1.38062		A-C1	0.00374841	1.98168		PNMAL1	0.00882336	1.40259		LINC00592	0.00945259	2.34612
ATG10	0.000467183	1.19656		ULBP2	0.00671463	1.36764		ACSM2A	0.0064757	1.36283		TRNP1	0.00998689	1.96899		ANKRD7	0.0109955	1.39762		IGF2BP2	0.00118814	2.32674
LOC392733	0.000505938	1.16455		ULBP3	0.0050719	1.32872		CRB3	0.00988626	1.35994		SPINK13	0.00226077	1.94735		FRRS1	0.00426256	1.39243		ROPN1	0.00492135	2.2579
ZNF549	0.000518552	0.825301		RAET1K	0.0109792	1.32019		ACSM5	0.00303347	1.35792		POM121L2	0.00589405	1.9433		ULBP3	0.000727908	1.38895		PSAT1	0.00490685	2.24111
C8ORF4	0.000540726	0.685414		LOC86077	0.00727894	1.31258		FLJ12825	0.0107248	1.33854		YBX2	0.00463973	1.90811		AGMO	0.00957449	1.37886		GPRC5A	0.00515136	2.19352
GRIP2	0.000549154	0.603767		ACY3	0.00992026	1.28375		ACY1	0.00635986	1.33364		TLCD1	0.0068782	1.82464		NR1H4	0.000575233	1.36896		ARVD2	0.00514915	2.17776
ZNF582	0.000599744	0.79591		RPL13L	0.0104746	1.2218		BEST3	0.00856825	1.30805		GPR45	0.0077952	1.77876		PKP2	0.00208502	1.35979		DRC7	0.00556873	2.09411
FUCA2	0.000599905	1.14395		IQCD	0.00582684	1.21991		CFAP221	0.00738096	1.30492		CKS2	0.00656923	1.72548		MDC2	0.00366431	1.35495		C2ORF70	0.00111526	2.09094
KCNIP4	0.000616361	1.33056		CASC2	0.00941722	1.21469		ACMSD	0.00540097	1.29536		TMEM132D	0.00790157	1.67707		AMACR	0.0102488	1.32163		LDHD	0.00593103	2.06649
AC006272.1	0.000627789	0.74224		TCTN1	0.000830942	1.17733		CLCF1	0.00777482	1.29228		SMIM6	0.00255571	1.67579		GRIP1	0.00736826	1.31385		YWHAEP7	0.000645848	2.04472
MCCC2	0.000634217	1.23062		LOC222226	0.00325831	1.17418		PDCR	0.0103771	1.29133		SLC39A12	0.00468677	1.65803		DNAJC22	0.000735238	1.31237		AP1M2	0.00159943	2.03053
METTL9	0.000756105	1.21756		FUK	0.00192883	1.17266		SIRT4	0.000796186	1.28725		PODXL2	0.00979498	1.65512		ACSM5	0.00725588	1.30573		ESPNL	0.00756815	1.99166
LOC91129	0.000809464	0.771216		AP4M1	0.00897412	1.13999		DNAJC22	0.00216371	1.27552		GNGT1	0.00160049	1.6527		CMBL	0.00250308	1.30552		FAM222A	0.00935561	1.99091
ABCC3	0.000872827	1.3377		LOC115417	0.00998021	1.13748		LINC01550	0.00387327	1.2733		VSTM5	0.00442456	1.61294		KIAA1467	0.00530687	1.2963		C1ORF105	0.00250065	1.97274
ROBO2	0.000881194	0.631917		RP11-419L10.1	0.00619194	0.923971		IDDM20	0.0072174	1.26686		ZNF474	0.00688385	1.61291		DMGDH	0.00131613	1.29213		NEFL	0.00869869	1.96639
GMCL1P1	0.00088909	1.34019		SF3B1	0.00481744	0.923875		CMBL	0.00830546	1.2617		LOC92982	0.00222552	1.58174		TMEM182	0.000953235	1.28524		TLCD1	0.00297491	1.90734
ABCA9	0.00089199	0.611463		SUV420H1	0.00661872	0.917642		MMACHC	0.00194694	1.26113		TPI1P3	0.00177257	1.56065		PRO2176	0.00790987	1.2831		UCHL1	0.00819406	1.89287
RUNX1T1	0.000955971	0.723834		LOC154534	0.00814361	0.915127		HPN	0.00236712	1.25988		DCE	0.00634291	1.54891		SPATA17	0.00961552	1.26863		CCDC91	0.00830511	1.87164
TCTN1	0.000957659	1.17552		ELF2	0.00180017	0.913129		FLJ45829	0.00368104	1.25875		SPSB2	0.00861305	1.54721		ZSWIM5	0.00495389	1.25297		PLEKHB1	0.00398222	1.86615
RASGRP2	0.000978634	0.778893		TBCK	0.00798435	0.910496		LPCAT3	0.00998932	1.2475		RPL22L1	0.000462847	1.53999		DTWD2	0.000775602	1.24546		PCDHA8	0.00651442	1.85748
PCBP2	0.000980394	1.1458		ZNF166	0.00729084	0.910466		ZSWIM5	0.006429	1.2443		DLX4	0.00573598	1.53988		LOC56921	0.0079568	1.24074		CKS2	0.00240819	1.85419
ITGA7	0.000995588	0.772472		KIAA0662	0.0058348	0.90897		ERBB3	0.00791675	1.24324		FAM20A	0.00696701	1.53445		CTH	0.00993877	1.23249		KCNK2	0.0104804	1.85116
DRAM1	0.00101484	1.18922		ZNF383	0.00606716	0.907524		SHMT2	0.00753505	1.22041		BTBD16	0.00964334	1.52308		LOC154106	0.00770646	1.22952		ARL4D	0.00602172	1.84954
TRPC4	0.00103317	0.770436		ZNF264	0.00386106	0.905858		ABHD6	0.00871553	1.21205		B3GNT3	0.00891129	1.51778		SLC35E3	0.000166468	1.22505		RHOF	0.00580319	1.80305
C2ORF70	0.00109064	1.70842		ZNF225	0.0108643	0.903911		CCDC125	0.00381248	1.19036		LOC197202	0.00661033	1.51527		TMEM200A	0.00273883	1.22437		LOC92982	0.000116028	1.79806
SPATS2	0.00109284	1.13987		TAF5	0.00745951	0.902681		FGFR1OP	0.00582015	1.18724		TRIB3	0.00596898	1.51026		DERA	0.0105619	1.22368		ACSM1	0.00505001	1.79567
BRI3BP	0.00110388	1.31263		FLJ12240	0.00755138	0.902467		TM7SF3	0.00581777	1.18664		NOX4	0.0022546	1.49885		MTRR	0.000143307	1.22252		CBS	0.00884836	1.78939
GUSB	0.00110498	1.18628		HSPC059	0.00905947	0.901725		BIVM	0.00568579	1.1749		COX7C	0.00727047	1.49434		TM7SF3	0.000817075	1.22182		SMIM6	0.000861596	1.77934
PEAR1	0.00113419	0.804043		GINGF	0.0105231	0.901461		PEX5	0.001031	1.16901		LOC155033	0.000879309	1.48731		GMCL1	0.00352917	1.21744		ADGRF3	0.00568858	1.77173
KLHL23	0.00116726	0.803323		ZNF270	0.00731523	0.900585		PAFAH2	0.0098766	1.16062		GDF15	0.0087489	1.47751		VAV3	0.00469561	1.217		LOC220509	0.0070224	1.76751
RERGL	0.00132175	0.608176		C11ORF30	0.00467691	0.900584		BCL7A	0.0105995	1.15916		RSPH14	0.00553784	1.4644		GCLM	0.00627035	1.21382		FAM71E1	0.00361234	1.75958
MRPS27	0.00132991	1.17732		ATXN3	0.00371515	0.899697		RSPH3	0.0104568	1.13085		PLAUR	0.005501	1.46273		PLEKHA5	0.0109676	1.21371		CHAC1	0.00473198	1.75797
GTF3	0.00136733	1.22669		DDX6	0.00490577	0.898957		PCBP2	0.00598047	1.12857		TPD52L1	0.00896182	1.4616		MCCC2	0.00207099	1.21107		KRT80	0.00176887	1.75482
SLIT3	0.00136855	0.758397		NCOA1	0.00586683	0.898497		UBE3B	0.00534744	1.11617		LOC100133836	0.00256382	1.45818		KBTBD11	0.00755522	1.2088		LOC220476	0.00932814	1.75301
MGC5370	0.00143784	1.20088		ZNF41	0.0078788	0.89849		LTV1	0.00720327	0.926724		C11ORF52	0.00607552	1.44667		EIF2AK3	0.00436875	1.20798		GPR35	0.00994938	1.74394
SLC4A2	0.0015135	1.20891		MEF2A	0.00713873	0.898357		GATAD2B	0.0107161	0.92054		LOC285733	0.00880395	1.44143		ANO6	0.001358	1.20709		TSPAN33	0.00478068	1.73817
GJD3	0.00153836	0.774827		INPP5F	0.00533535	0.897673		CPSF6	0.0108731	0.920508		C16ORF59	0.00711493	1.43933		SMPDL3A	0.00677224	1.20438		TG	0.0030341	1.73599
WDR66	0.00154646	1.63556		KIAA0355	0.0100992	0.897314		SF3B1	0.00771175	0.919908		POLR2J	0.0039875	1.43856		C12ORF66	0.0012221	1.19364		SPX	0.00602772	1.72809
LOC730055	0.00156254	0.782481		SAP30L	0.0108653	0.896935		SRSF1	0.00549597	0.916596		SNHG6	0.00461827	1.42717		PGK1	0.00499333	1.19267		MAL2	0.00308439	1.72528
DMGDH	0.00156427	1.27126		OAZ2	0.00808837	0.894002		PPIL4	0.00163405	0.916239		MSRB1	0.00414201	1.41697		RHPN2	0.00298519	1.19093		ATP5J2	0.00487762	1.71692
LOC222226	0.00159064	1.18595		INPP5A	0.00696002	0.893718		ZC3H11A	0.00609319	0.91499		C19ORF53	0.00500734	1.41293		ANXA4	0.00722725	1.19089		TPD52L1	0.000549364	1.71226
SNED1	0.00160109	0.82746		FLJ23404	0.00475763	0.8936		HNRNPA2B1	0.00745136	0.912429		TAF10	0.00733054	1.40928		CDAN2	0.00432472	1.18921		C12ORF75	0.00834775	1.70615
ZNFC25	0.00163938	0.854559		CGGBP1	0.0105072	0.893377		ELF2	0.00246836	0.912013		LOC115988	0.00485219	1.40915		DENND5B	0.00944464	1.18162		ECI1	0.0109144	1.70214
CERS2	0.00164829	1.20314		KLC1	0.00188045	0.892699		RAB12	0.00713973	0.907912		CISD1	0.00989659	1.40478		MRPS35	0.00401599	1.18084		LOC101929880	0.00426335	1.68297
ZBED3	0.00166234	1.28077		MTMR9	0.0063017	0.89246		TANK	0.00702665	0.907378		ATP6V0E2	0.00758369	1.40341		ZDHHC10	0.00503735	1.17841		NECAB3	0.0013653	1.66954
ATP8B2	0.00170338	0.824668		DDHD1	0.00600994	0.892343		S100PBP	0.00918927	0.906484		ST7-OT3	0.00159516	1.40291		DKFZP779L1068	0.00960551	1.17413		ADORA1	0.00582579	1.65705
SMO	0.00172169	1.28499		LOC101927758	0.0107799	0.89172		FAM208A	0.00930945	0.905372		UXT	0.0047286	1.40228		LOC619531	0.00587083	1.17124		ANXA13	0.00182602	1.64785
TUB	0.00173879	0.698535		KAT6A	0.00772607	0.891339		HAUS3	0.00931961	0.902964		ZFAS1	0.000344531	1.4014		KIAA0895	0.0100773	1.17116		LOC155033	7.61083e-05	1.63727
KIAA0040	0.00175194	0.849364		KIAA1546	0.00699411	0.888601		LOC105372391	0.00766816	0.901237		PTRHD1	0.00390572	1.39621		SPATS2	0.000659973	1.16704		LOC154989	0.00942689	1.63419
MAGI3	0.00178965	0.718399		RSF1	0.00637434	0.888443		ZNF264	0.0040123	0.90104		MGC10851	0.00166	1.39579		GFM2	0.00645868	1.16657		GDF15	0.00232654	1.63129
CACNA1C	0.00180932	0.765894		TRIM62	0.0022099	0.888306		MBNL1	0.0104047	0.900842		MGST1	0.00139186	1.39254		RIN2	0.0052722	1.16596		CDPX2	0.00949717	1.63112
TMEM182	0.00183929	1.24816		SEMA4C	0.00712018	0.88828		ZBTB34	0.00409978	0.899118		OLMALINC	0.00503776	1.39201		TMED2	0.00704568	1.16384		SPSB2	0.00245332	1.62786
ZC3HC1	0.00185315	1.18655		LOC101928852	0.00527167	0.888257		SSB	0.00410025	0.898967		LOC86077	0.00489346	1.38998		CCDC125	0.0099865	1.162		ATP5G1	0.0101928	1.62618
BTN2A1	0.00191595	0.9019		FAM13B	0.0102272	0.888075		PPP1R12A	0.00410139	0.898144		METTL1	0.00246933	1.38987		ALG10	0.00718894	1.15828		SSR4	0.0109451	1.62476
SH3BP5	0.00194803	0.833198		ZNF71	0.00314418	0.887992		MBD2	0.0031479	0.897781		NB	0.000908478	1.38807		CERS2	0.00692224	1.15792		DCE	0.00255217	1.60929
NCOA7	0.00198011	0.773855		ZNF776	0.00246906	0.887792		FLJ11208	0.00368493	0.897221		FLR	0.00123942	1.38724		RSPH3	0.00306693	1.15593		WDR66	0.0041028	1.60824
POM121	0.00200285	1.13687		JARID2	0.0014695	0.887691		2014-09-06	0.00774816	0.89653		HMBS	0.00286567	1.38518		PCBP2	0.000410545	1.15544		LOC51178	0.00239523	1.60687
PTCD1	0.00202629	1.1932		ZNF175	0.00666922	0.887664		VRK1	0.00919444	0.895398		FANCH	0.00817344	1.38434		TCTN1	0.00513222	1.15443		ATP6V0E2	0.000220435	1.59475
LOC155033	0.00220977	1.43115		SEC14L1	0.00998249	0.886497		MSL2	0.00837655	0.895218		NQO1	0.00734016	1.37844		PEX5	0.00297927	1.15366		GNGT1	0.00648614	1.57894
LINC01139	0.00230356	0.683386		MSL2	0.000847907	0.886418		USP6NL	0.00559994	0.894979		ORMDL2	0.00513049	1.37695		NADK2	0.00618704	1.14632		C16ORF59	0.00174147	1.57318
GABRP	0.0023071	0.354493		LOC654202	0.000771362	0.885436		GORAB	0.00881541	0.893913		MPV17L2	0.00500341	1.37566		DIP2B	0.00553263	1.14585		LOC116033	0.00740398	1.57282
RITA1	0.00231095	1.1969		WHSC1L1	0.00202316	0.885275		ZNF270	0.00768974	0.893144		MRPL36	0.000439921	1.37456		TFB2M	0.00759144	1.1441		ZP3	0.00347708	1.57254
HOXA9	0.00233363	1.276		ZNF25	0.00456898	0.885087		FAM76B	0.00718578	0.892883		KRT10	0.000814339	1.37353		TMEM5	0.00367544	1.14321		SPIRE2	0.00747055	1.56266
CDK5	0.00234109	1.26589		FAM214A	0.00777632	0.885073		ZNF613	0.00510414	0.892546		PRO2760	0.00219468	1.37241		ZNF28	0.0066163	1.14126		B3GNT4	0.00792834	1.56266
FUK	0.00236957	1.23311		KIF13A	0.0105581	0.885001		PRPF38B	0.00436195	0.891558		TARBP2	0.00140394	1.37203		MRPL42	0.00695281	1.13852		NDUFS2L	0.00389228	1.56195
NMUR1	0.00239634	0.773496		DUSP7	0.00978094	0.884917		RC3H1	0.00449524	0.891145		MLST8	0.0095242	1.3684		PRO1748	0.0104799	1.1364		HMGA1	0.00711965	1.56012
CHEK2	0.00242945	1.27942		CENPC	0.00875646	0.884914		ATXN1	0.00466559	0.890302		LOC63441	0.00916113	1.36576		WDR12	0.00484805	1.1358		C19ORF48	0.00499097	1.54866
SHMT2	0.00253849	1.29031		TRAF6	0.00367199	0.883972		LOC51240	0.0107527	0.889319		PDZK1IP1	0.00827001	1.36176		MGC5499	0.00637274	1.12927		SNRNP25	0.00875018	1.54745
PRO2577	0.00258679	1.20808		PCM1	0.004407	0.883951		RNF138	0.00913536	0.889056		RPLP0	0.00817564	1.35902		FASTKD3	0.00914015	1.12862		PYGB	0.000402133	1.54198
PGR	0.00260445	0.473659		ZNF510	0.00220167	0.883601		DEK	0.00844525	0.888562		SLC16A13	0.00649837	1.35639		APPL2	0.0100998	1.12676		COX7C	0.00416029	1.53775
NUP43	0.00263725	1.11042		TBCEL	0.00395201	0.8833		HECA	0.00380949	0.888542		PIR	0.00502287	1.35385		STARD3NL	0.00668337	1.12581		PRR13	0.00774272	1.53581
LOC51683	0.00266975	0.835886		ZNF675	0.00971051	0.883109		ZNF805	0.00285213	0.886729		BNIP1	0.00922746	1.35198		NECAP1	0.00286618	1.12155		PCDHA2	0.00686887	1.53158
ZNF671	0.00268609	0.839711		RBMS1	0.00226135	0.882883		HSPC059	0.00208125	0.886521		C6orf16	0.00880778	1.34645		WASF1	0.00357318	1.11733		GRIP1	6.65182e-05	1.53135
ZNF773	0.00268617	0.853656		BOD1L1	0.00545185	0.88249		CGGBP1	0.00506292	0.886237		HTATIP2	0.0011081	1.34614		RAD17	0.00816593	1.11422		BTBD16	0.0104438	1.52719
ZNF708	0.00269521	0.860878		ZNF585A	0.0101423	0.882449		ZNF280C	0.00521547	0.886143		LYRM1	0.00355126	1.34347		MGC9344	0.00992381	1.11166		HMGB3	0.00350896	1.51993
ANKRD7	0.00272219	1.4624		TNRC6B	0.0011957	0.88219		LOC149767	0.00347545	0.884403		CCNB1	0.00604883	1.3416		PAIP1	0.00523118	1.10702		SLC25A39	0.00326	1.51988
SETBP1	0.00293409	0.853635		C21ORF91	0.0106736	0.881847		SCLT1	0.00196859	0.883454		GAPDH	0.00038585	1.34144		RNF146	0.00132545	0.926823		TRIB3	0.00531794	1.51851
ZNF550	0.00301885	0.860554		FLJ11783	0.00315021	0.881169		CREB1	0.00242319	0.883362		QPCTL	0.00986053	1.34067		SRSF1	0.0102546	0.925064		CDCA3	0.0090379	1.51791
BHR1	0.00308088	0.57813		ZNF559	0.00226009	0.880948		ADSS	0.00835224	0.882476		MRPS15	0.00534779	1.33745		MBD1	0.00980128	0.919755		ATP6V0C	0.00794056	1.51784
PPP1R12B	0.00309225	0.755619		LINC00464	0.00907857	0.880856		MNG1	0.00664374	0.881565		SRA1	0.00996794	1.33654		ZNF599	0.0101042	0.919036		PNMAL1	0.00119858	1.51647
NSF	0.00311361	1.14655		NR2C2	0.00181808	0.879904		IRF2	0.00123176	0.880614		MIEN1	0.00454407	1.33551		MAP3K3	0.00885458	0.917733		PRA	0.0102893	1.51303
PASK	0.00314115	0.842818		ZNF256	0.00518651	0.879815		ZNF624	0.0057631	0.880008		EXOSC5	0.0054432	1.33408		STRIP1	0.00826966	0.917172		NQO1	0.00344014	1.50846
SPINK13	0.00318272	1.97913		KIAA2026	0.00789845	0.879456		LOC220901	0.00615908	0.879418		C20ORF24	0.00289827	1.33191		DCAF5	0.0100744	0.9161		POLR2J	0.00136046	1.5049
BMP5	0.00318772	0.464815		LOC94538	0.0062023	0.879067		TMX3	0.0019786	0.878852		FAM96B	0.00376189	1.32959		LOC101928029	0.010387	0.915352		PHKA1	0.0088886	1.50057
SLC25A13	0.00318863	1.16292		SMCHD1	0.00435761	0.878147		GAB1	0.0107215	0.878002		PLIN3	0.0072761	1.32894		FCHSD2	0.00831072	0.91414		UQCRFS1	0.00838934	1.49817
LOC144305	0.0032145	1.14886		MACF1	0.00523075	0.878082		TNRC6B	0.00139398	0.877564		ATP6V0E1	0.00682962	1.32389		PBX2	0.00466575	0.913962		LOC101928965	0.00729623	1.49704
COQ5	0.00323572	1.15416		TANC1	0.00187053	0.878062		ZNF333	0.00283867	0.877554		LOC115699	0.00157751	1.32278		DHX16	0.00414278	0.911913		CENPM	0.00195383	1.49457
LOC56921	0.00327453	1.25724		ZNF790	0.00512027	0.87794		DDHD1	0.00213132	0.876111		LPCAT3	0.00116195	1.32062		ELF2	0.00115113	0.910133		KDELR3	0.00545848	1.49229
MGC5499	0.00329149	1.13514		ZNF543	0.00232301	0.87786		CCDC66	0.00908466	0.875094		MRPL40	0.00239137	1.32017		PPP1R12A	0.00986748	0.910019		TIMM17B	0.00874894	1.49044
AFAP1L2	0.00329302	0.841476		FLI1	0.00844216	0.877605		NR2C2	0.00191051	0.875018		MGC13000	0.00335171	1.31575		RBM17	0.00425325	0.908935		COPRS	0.00514341	1.4894
PPP1R16B	0.00332087	0.777801		LBC	0.00284451	0.877179		CEP63	0.00143992	0.874792		NY-BR-87	0.00676996	1.31496		DKFZP434B094	0.00518953	0.908456		PLEKHG6	0.0107764	1.48719
LOC285733	0.00335422	1.49412		LOC439979	0.00545841	0.87705		IER5	0.00604875	0.874734		TRAF4	0.00899502	1.3148		RXRB	0.00485902	0.907884		APOO	0.00677825	1.48685
NR1H4	0.00341766	1.29237		PPM1F	0.0055061	0.87649		RP15	0.00525721	0.873667		PRDX4	0.00161368	1.31425		AUF1	0.00903107	0.907251		CNNM1	0.00278497	1.48335
LOC115417	0.00344135	1.25108		ZNF773	0.00894681	0.87644		ASAP1	0.00741014	0.87363		RPL18A	0.000935727	1.31378		HAUS3	0.0090628	0.906973		IGF2BP1	0.00768549	1.48263
GCSAM	0.00346773	0.778255		DNAJC18	0.00633665	0.875768		PIP4K2A	0.00704565	0.873395		LOC65515	0.00391136	1.31316		TNRC6B	0.00779023	0.901839		PPIF	0.001746	1.48211
PEX5	0.00349541	1.14514		XRN1	0.0100169	0.875427		ZNF430	0.00877887	0.872849		UBE2T	0.00895159	1.31201		TBRG1	0.00186172	0.901519		C7ORF55	0.00541223	1.47734
LOC158730	0.00362228	2.47314		RNF169	0.00567155	0.875157		INO80D	0.000949571	0.872821		ERBA2L	0.00588006	1.31197		HNRNPA2B1	0.00105785	0.901506		RPL22L1	0.00216736	1.47648
WSB2	0.00364534	1.1728		C11ORF95	0.00285637	0.874976		NCOA3	0.00555972	0.872625		HIGD2A	0.0091976	1.31069		LOC154534	0.00131471	0.901229		RPSAP58	0.00835697	1.47201
SLC32A1	0.00370231	0.369605		SPRED2	0.00195246	0.874617		LOC125097	0.00290696	0.872141		DJ347H13.4	0.000797966	1.30976		TRA2A	0.00871113	0.901215		AURKA	0.00104718	1.47134
CCDC169	0.00370459	1.50976		ZNF47	0.00718089	0.873921		ROCK1	0.00219795	0.870624		GPX8	0.00224464	1.30954		PAN3	0.00543984	0.900842		TARBP2	0.00010672	1.47022
GPR20	0.00372301	0.74268		FLJ20053	0.00832504	0.87338		MEX3C	0.000257624	0.870015		C12ORF45	0.0054299	1.30912		HSPC059	0.00538713	0.900469		ANKRD7	0.00261755	1.47018
BEST3	0.0038609	1.32978		MNG1	0.00093568	0.873285		ALS2CR18	0.0106263	0.86893		POLR3K	0.00944921	1.30857		SRSF4	0.00570265	0.900332		TK1	0.00649603	1.4677
ANXA4	0.00389192	1.20307		KIAA0922	0.00422235	0.873068		LOC100131848	0.010269	0.86672		LOC124554	0.00778688	1.30741		HCG18	0.00543917	0.900326		MGC10851	0.000362004	1.46735
MCMDC2	0.00392706	1.22858		LOC115481	0.00187108	0.872448		LOC102723980	0.00188399	0.866534		OSIL	0.00129523	1.30682		MEF2D	0.00531205	0.899419		SLC25A10	0.0047363	1.46675
IGF2BP1	0.00394943	1.51811		FLJ23347	0.00362733	0.871997		AKIRIN2-AS1	0.0102159	0.866342		RPL41	0.00178399	1.30675		FLJ23404	0.0102456	0.899098		MGC27382	0.0103738	1.46579
PDE5A	0.00395759	0.800003		FLJ11064	0.0052389	0.87166		FLJ21142	0.00601865	0.866263		C12ORF10	0.00163937	1.3065		HECA	0.00850334	0.898885		FAM201A	0.000566533	1.46576
SRD5A3	0.00397015	1.18913		ZNF595	0.0012371	0.871133		LOC57334	0.00232702	0.865568		ST3GAL5	0.00385097	1.30393		S100PBP	0.00315096	0.898201		MMP24	0.000920276	1.46498
M6PR	0.00397825	1.12404		HECA	0.000881784	0.870746		RAB8B	0.0108922	0.865211		PDCR	0.00857248	1.30109		MAX	0.010968	0.898094		CBR1	0.00677584	1.46413
NHLRC1	0.00399582	1.20493		ALS2CR18	0.00916057	0.870607		AC3	0.00640115	0.864754		LOC732143	0.00187776	1.30096		ZBTB49	0.00357605	0.897897		SNHG6	0.00256402	1.46411
AS1	0.00399886	0.791228		ZNF624	0.0040709	0.87047		SP4	0.00800806	0.864569		HAGH	0.000522126	1.29996		ZSCAN9	0.00752851	0.895608		MLIP	0.00989437	1.46307
GSDMA	0.00401691	1.48659		CEP68	0.00274711	0.870431		LOC119466	0.00127709	0.8644		MYDGF	0.0071272	1.29994		ZNF799	0.00657768	0.894626		LOC196409	0.0101132	1.46243
C7	0.00417454	0.534142		CYTH3	0.00208643	0.870407		ZNF615	0.0083703	0.863867		ADI1	0.00963166	1.29959		KIAA0662	0.00181199	0.894553		LOC86077	0.00108316	1.46232
ZNF350	0.00418933	0.856814		ZFHX3	0.00235177	0.870326		UACA	0.0095616	0.862581		SNHG11	0.00627526	1.2992		IRF2	0.00341093	0.893752		RAB3A	0.00805511	1.46029
KLHL33	0.0041961	0.650332		PIK3C2A	0.0072986	0.870308		LOC55873	0.0100603	0.862432		MRPS36	0.00258054	1.29856		LOC101928852	0.00740431	0.893236		MRPS35	0.00640274	1.45989
PPIAL4G	0.0043504	1.26234		PIK3C2B	0.00829321	0.869488		RFTN1	0.00876867	0.861509		SLC39A11	0.00946457	1.29803		FLJ11208	0.00296523	0.893057		CSPG5	0.00677104	1.45964
FAM13C	0.00441537	0.639814		DISC1	0.00391514	0.869463		ZNF283	0.00234662	0.861303		LOC124057	0.00971458	1.29544		P1P373C6	0.00634424	0.893035		ORMDL2	0.00105309	1.45804
C17ORF58	0.00441708	1.21567		CBL	0.000589945	0.869411		ANKRD50	0.0079066	0.859223		CDK5	0.001011	1.29484		MSL2	0.00422555	0.892972		TBC1D2	0.0105285	1.45647
RAD17	0.00445821	1.12196		MGC45556	0.00384622	0.869334		PRDM1	0.0100223	0.858791		ARPC1B	0.00928877	1.29049		LOC88523	0.00816723	0.892731		OPH	0.00419041	1.45507
GRM5	0.00449653	1.55277		FYN	0.00816403	0.867798		LOC105374030	0.00586782	0.858595		RPL26L1	0.0036123	1.28897		ABCA11P	0.00920327	0.892669		PPDPF	0.00612855	1.45498
CBX4	0.004514	1.23095		ROCK1	0.00104216	0.867798		FRMD4A	0.00407811	0.858488		PPGB	0.00215605	1.28865		INO80D	0.0038404	0.89215		NNT	0.00977952	1.45224
XAF1	0.00451993	0.783972		ZNF613	0.000140242	0.867694		RAP2B	0.00813692	0.856577		NPAS2	0.00514522	1.28647		ZFP3	0.00606828	0.891433		FABP3	0.0109886	1.44954
C12ORF60	0.00452972	1.2876		MYLIP	0.00236304	0.867679		CNTRL	0.0099433	0.856501		ASNS	0.00771626	1.28583		PRO2435	0.00667809	0.890682		C19ORF53	0.00526574	1.44773
KRT80	0.00460171	1.62111		C6orf98	0.00641172	0.867196		ZNF708	0.00326415	0.856199		LOC155123	0.00637202	1.2851		FRMD8	0.0066332	0.889332		DCTPP1	0.00689187	1.44417
AGBL5	0.00460896	1.20397		ZNF570	0.0034149	0.86711		ZNF350	0.00456635	0.855208		BANF1	0.00748493	1.28487		NR2C2	0.00446488	0.887851		HKDC1	0.00693808	1.4429
CDK14	0.00463936	1.18963		ARHGEF17	0.00330986	0.866679		TTC13	0.00197648	0.854157		MRPS23	0.00106982	1.28368		SIN3B	0.00764066	0.887835		GOT1	0.00607819	1.43944
ANGPT1	0.00464483	0.720915		MGC5363	0.00967317	0.866572		SPDL1	0.00883452	0.854143		TMEM189	0.00815583	1.28352		NSMCE4A	0.00105606	0.887788		LOC101927064	0.00569835	1.43568
KIAA0895	0.00468474	1.17051		VCL	0.00482276	0.866492		STK38L	0.0057987	0.853666		LOC51064	0.00727106	1.28259		ACIN1	0.00629982	0.887754		NME2	0.00857408	1.43497
RP15	0.00481046	0.866623		GAB1	0.00420896	0.86616		ZAK	0.00315074	0.853129		CNPY2	0.00711199	1.28116		IRF9	0.00872711	0.886584		C11ORF52	0.00677799	1.43483
JPD	0.0048464	1.19139		ANTXR2	0.00181968	0.865504		MGC21051	0.00996604	0.851279		PSMD9	0.00277298	1.28104		IKZF4	0.00167968	0.885318		DANCR	0.00145801	1.43021
AGMO	0.00491242	1.37685		ZNF671	0.00875136	0.865472		TRIM22	0.00860458	0.851272		TMEM258	0.000876591	1.28051		MLLT6	0.0072142	0.885305		ELF3	0.00476436	1.42958
CXorf22	0.00494737	2.32272		ARHGEF6	0.00507839	0.865405		SMC4	0.00546263	0.851006		RPL23A	0.00836027	1.27918		ZNF182	0.00911663	0.885304		HYAL1	0.00641086	1.42844
KRT10	0.00500312	1.31397		TJP1	0.000346775	0.865185		MIS18BP1	0.00373733	0.847893		PMM2	0.00269972	1.27854		HNRNPA3	0.00318868	0.885274		RMI2	0.000527317	1.42795
NEXN	0.00504024	0.735537		STAG1	0.00569116	0.864778		STXBP5	0.0089621	0.846927		DUS1L	0.0054006	1.27709		TJP1	0.00518036	0.885114		AMACR	0.00399977	1.42494
PLBD2	0.00505155	1.17258		IQSEC1	0.000685455	0.864201		SMCHD1	0.000287124	0.846602		CTU2	0.00286641	1.27571		SRSF11	0.00869705	0.88495		COQ10A	0.00753767	1.42403
DCE	0.00511206	1.56296		RNF38	0.000615658	0.863555		ZNF519	0.00271307	0.846259		NOP10	0.0019534	1.27565		FLJ31529	0.00901477	0.883259		LRRC20	0.010655	1.42326
ZBED3-AS1	0.00511987	1.39268		KLF12	0.00159655	0.863107		ZNFC25	0.00237518	0.84595		LSM10	0.00658066	1.27557		SLC7A6	0.00412412	0.882218		TNFSF9	0.0062599	1.42213
LOC641901	0.00515785	0.138849		KCTD15	0.0097776	0.863066		C4ORF46	0.00103193	0.845866		GNB1L	0.00758651	1.27444		DKFZP586J1822	0.0032557	0.881952		SHFM1	0.00657662	1.42156
LOC88851	0.00524718	1.25567		LOC87229	0.00625315	0.86258		ETS1	0.00880855	0.845858		OST4	0.00218975	1.27429		ZNF270	0.00148343	0.881599		HTATIP2	0.000212269	1.42073
BCL2L2	0.00527787	0.861397		MPRIP	0.000686026	0.861955		ZEB1	0.00412929	0.845483		NR1H4	0.00696258	1.27407		PLCG1	0.00493532	0.881436		YIPF2	0.00699403	1.42016
LOC116258	0.00534437	1.19122		ZNF100	0.00302827	0.861764		CBLB	0.000214017	0.844668		SHMT2	0.00586774	1.2733		LOC100129892	0.000714303	0.8806		CCDC34	0.00808865	1.41918
AADACL4	0.00535173	0.452172		ZNF430	0.00344222	0.861161		FNBP1	0.00257955	0.844385		KFSD	0.00434944	1.27234		RING1	0.00819076	0.880029		MPV17L2	0.00214955	1.41908
TDRD3	0.005352	1.20405		SIPA1L2	0.00394525	0.861048		CDC42EP3	0.00316027	0.843974		CD68	0.0049978	1.26783		ABCC10	0.00541921	0.879133		ATP5G2	0.00305172	1.41648
ARSD	0.00541551	1.20051		FLJ20696	0.00491378	0.860811		RASA2	0.00275557	0.843468		NAGPA	0.00294864	1.26677		PNN	0.00561581	0.877685		TAF10	0.00675948	1.41564
ALG8	0.00546071	1.17012		ZNF708	0.0042819	0.860738		VCL	0.00141413	0.842857		SLC52A2	0.00522223	1.26573		DDHD1	0.00154489	0.877455		RPLP0	0.00322065	1.41482
SRSF9	0.0054849	1.15037		RASAL2	0.00253121	0.860543		CD302	0.00588902	0.842342		SLC25A19	0.000884064	1.26563		ZNF606	0.0094715	0.877277		ACOT8	0.00812464	1.41426
RPL41	0.00551524	1.25171		KIAA1109	0.00841226	0.860159		WDFY2	0.00184677	0.841963		SMAGP	0.00528137	1.2647		RP15	0.0064212	0.876899		RILP	0.00164819	1.41347
PLEKHA5	0.00551887	1.23051		ZNFC25	0.00265317	0.859081		KRP	0.010898	0.841121		MAGOHB	0.000388194	1.26344		SKI	0.00237494	0.876806		LOC115042	0.00974639	1.41244
PARM1	0.00552036	0.78818		ROCK2	0.00602266	0.858755		GNG2	0.00965231	0.840496		RBKS	0.00629335	1.26208		NEK3	0.00830033	0.876803		KRT10	0.000356196	1.41074
BAX	0.00559497	1.1828		ZNF37A	0.00116317	0.858745		DBNDD2	0.00736776	0.839324		GRINA	0.00454931	1.26133		ZNF788	0.00998109	0.876466		NDUFA1	0.00275001	1.41015
WBSCR16	0.00567891	1.17675		BCAR2	0.00143014	0.858617		LOC654198	0.00307533	0.837934		MRPL17	0.00639563	1.26132		RASAL2	0.0080899	0.876034		GINS2	0.00141546	1.40951
OR11-134	0.00571794	#DIV/0!		SVIL	0.00492584	0.858397		PLEKHG1	0.00754756	0.837467		PSENEN	0.00798638	1.26062		ZBTB40	0.00146605	0.875853		RSPH14	0.00946873	1.40883
TMEM19	0.00575074	1.33405		CBLB	0.000881207	0.857942		FMNL2	0.00538953	0.836472		C12ORF60	0.00802061	1.26061		SLCO3A1	0.006414	0.875699		TUBA4A	0.0102511	1.40879
IRX5	0.00577428	1.55754		LOC90346	0.00972291	0.8574		SH3BP5	0.00191049	0.834552		CHEK2	0.00395463	1.26026		ZNF333	0.0016937	0.874392		LOC115396	0.000557549	1.40673
SLC35F1	0.00586828	0.798041		LOC170187	0.00100015	0.856413		MB21D1	0.0074905	0.83424		RPS7	0.00801208	1.25894		JARID2	0.00382832	0.873061		RAET1K	0.00211728	1.40624
LOC100133920	0.00594719	2.47381		ZKSCAN8	0.00307562	0.855784		LOC641947	0.00720775	0.833675		COQ9	0.00499461	1.25854		LOC100133692	0.00221031	0.87289		TACR2	0.00356587	1.40535
ARSB	0.00601578	1.23253		ANKRD50	0.00415007	0.85577		LOC105371602	0.00195992	0.833568		MTFR2	0.00726802	1.25755		FLJ20092	0.0076924	0.872651		MGST1	0.00140467	1.40347
CDKN2A-AS1	0.0060192	1.88499		PALM2-AKAP2	0.00473926	0.855489		LCP2	0.00954826	0.833424		PHB2	0.00450487	1.25634		LINC00324	0.00791088	0.872641		CISD1	0.00842795	1.40229
PNCA1	0.00602686	0.786465		RSS	0.00694044	0.853563		LYST-IT1	0.00294091	0.832665		NDUFS4	0.00221319	1.25557		SEMA4C	0.0027429	0.872263		MLST8	0.00464907	1.40154
GIMAP7	0.00617373	0.839834		ZNF347	0.00222601	0.853536		JAK2	0.00626952	0.831551		FLAD1	0.00576506	1.25511		ZNF613	0.000528179	0.872072		FAM186B	0.00151994	1.40083
PLN	0.00617995	0.751187		FMNL3	0.00101786	0.853421		FLJ37858	0.00555924	0.830673		DERA	0.00204599	1.25456		CYTH1	0.00288917	0.871885		SMUG1	0.00785573	1.39992
ZFP28	0.0061975	0.819185		LOC351912	0.00755467	0.853111		LRRC70	0.0101293	0.8303		COASY	0.00991153	1.25436		ARHGEF3	0.00737458	0.871817		BRI3BP	0.000219341	1.39911
RPL13L	0.0062161	1.24017		SYNJ2	0.00853764	0.853015		IL16	0.00826429	0.829441		C1RL	0.0032748	1.25382		FLI1	0.00684587	0.871019		ENO2	0.00155937	1.39703
LOC393051	0.00622151	0.451332		AFAP1L2	0.0064793	0.852707		SEC14L1P1	0.00454602	0.829098		DHRSX	0.00539479	1.253		CYTH3	0.00876578	0.870596		SDC4	0.00124085	1.39687
CCDC74B	0.00623465	1.337		GIMAP7	0.0106808	0.852699		EID3	0.00708064	0.828874		LOC116024	4.01942e-05	1.25166		DUSP7	0.00693556	0.869433		C20orf126	0.00614913	1.39645
GABRG1	0.00625153	0.516134		CREBRF	0.0108784	0.851779		LOC115261	0.00474854	0.828782		EXOSC1	0.00040805	1.25122		ZNF256	0.00259289	0.869363		LOC115988	0.00600467	1.39627
SRSF5	0.00628903	0.873487		TNFAIP8L1	0.00998606	0.851689		ZNF284	0.00428242	0.828758		TCEB1	0.00250075	1.24976		N4BP2L1	0.000922845	0.869205		NUDT16P1	0.00072142	1.39576
GLI2	0.0063593	0.77514		ZNF85	0.00630815	0.851459		SGOL2	0.00569171	0.828381		BOLA3	0.00670908	1.2493		HKE1.5	0.00573295	0.869048		FLJ23555	0.00465081	1.39214
TMOD2	0.00635988	0.826356		MEF2C	0.00576783	0.850687		ZNF681	0.00172943	0.827442		COPZ1	0.0036381	1.2491		C11ORF84	0.007814	0.869011		ST7-OT3	0.00227528	1.39142
LOC641845	0.0063707	1.17951		INSR	0.0057811	0.85045		CASP3	0.00075649	0.826469		DHODH	0.00625257	1.24906		MSANTD2	0.00883216	0.868614		METTL1	0.00347124	1.3911
AP4M1	0.00643632	1.18804		ZNF649	0.00322774	0.84987		ITPRIPL2	0.00133527	0.825902		POP4	0.00671038	1.24788		KIAA0226	0.00167432	0.867991		ELOVL6	0.00173146	1.39056
IFT140	0.0064733	1.1459		ZNF91	0.0108525	0.8497		DOCK10	0.00583075	0.825584		CCDC127	0.00523659	1.24782		LOC115940	0.00553765	0.86643		PPGB	0.000786347	1.38811
TARBP2	0.00648111	1.3048		SHROOM4	0.00488043	0.849281		ENC1	0.00253775	0.824109		BID	0.000755244	1.24725		LOC112990	0.00574587	0.866101		ASNS	0.000493361	1.38664
ADSD	0.00649731	0.620777		TGFBR2	0.00730059	0.84897		PHF19	0.000953046	0.823944		GOT2	0.00964031	1.24676		DDX39B	0.000623501	0.865645		ACTR3B	0.000231281	1.38659
PNMAL1	0.00651759	1.40322		ZNF615	0.0022511	0.848151		ARHGEF6	0.000176759	0.823309		P2RX4	0.00266734	1.2459		MXRA3~withdrawn	0.0061611	0.865602		MRPL15	0.00265146	1.38639
KIAA0948	0.00656889	1.18505		GNG2	0.00680949	0.847737		NKTR	0.00945228	0.823259		POLR2H	0.00400112	1.24532		LOC87229	0.0101787	0.865574		BCAT2	0.00509473	1.38595
TBCAa	0.00661773	1.16177		DOCK6	0.00189701	0.847201		LOC51683	0.00129655	0.822025		LOC200474	0.005909	1.2451		ZSCAN30	0.00120469	0.865157		C20ORF24	0.000723251	1.38571
E2F6	0.00663371	1.117		MAML3	0.00166558	0.847195		LOC116279	0.00123772	0.82152		SNRPG	0.00373462	1.24414		SH3KBP1	0.0102552	0.864798		ECSIT	0.0108533	1.38409
CLEC12B	0.00665646	0.663348		KIAA0040	0.000333403	0.845904		FLJ20696	0.000284145	0.821423		LOC220610	0.00663825	1.24395		ITPRIPL2	0.00787271	0.864477		KLHDC9	0.00648011	1.38225
NTRK3	0.00670312	0.694912		CDC42EP3	0.00572631	0.845637		SLC24A4	0.00609046	0.82131		GLA	0.00281907	1.24328		LOC283070	0.008624	0.864391		E2F1	0.00991788	1.38062
EPHA6	0.00670507	1.53005		LOC100131848	0.00222696	0.845505		CLIC2	0.000911957	0.820509		LOC115339	0.00172692	1.24276		ZNF350	0.00666938	0.864237		METTL7B	0.00761424	1.37975
FZD7	0.00670519	0.784976		KIAA0453	0.00347302	0.844621		LOC101929339	0.0046909	0.818736		KIAA0948	0.00101813	1.24254		MAP4K2	0.00965741	0.863953		MAPKAPK3	0.000713583	1.37925
LOC222186	0.00674274	1.15106		LOC654198	0.00347062	0.84437		SYNJ2	0.00402692	0.817631		RPS15A	0.00536647	1.24121		ODF2L	0.00669786	0.863203		ATP5B	0.000601839	1.37882
C12ORF66	0.00674388	1.15185		EPAS1	0.00882045	0.844301		GIMAP7	0.00129331	0.817331		CENPW	0.00914431	1.24121		RBMS1	0.00445971	0.862963		C6orf16	0.00760348	1.37847
