# Supplementary material for: Exosome component 1 cleaves single-stranded DNA and sensitizes human kidney renal clear cell carcinoma cells to poly(ADP-ribose) polymerase inhibitor
Source: eLife. 2021 Jun 23;10:e69454. doi: 10.7554/eLife.69454 (PMC8260222; doi:10.7554/eLife.69454)
Supplement: Supplementary file 3. [file elife-69454-supp3.xlsx]

## Sheet: Supplementary File 3
C>A/ G>T (VHL)
Gene	P value	FPKM
LINC00592	8.5e-05	5.65
ZNF474	0.000257	17.78
MPV17L2	0.000559	0.01
PLAUR	0.00126	311.87
CENPW	0.00169	940.93
PRO2760	0.00277	311.87
TPD52L1	0.00295	17.78
LOC100133836	0.00367	5.65
GLA	0.00367	0.3
SLC52A2	0.0037	35.57
OLMALINC	0.00371	66.69
ARPC1B	0.00505	14.2
MGC10851	0.00528	5.65
SSC4D	0.00688	35.57
BTBD16	0.00771	1365.72
HMBS	0.00936	103.11
GPR45	0.00945	0.3
RAB5IF	0.00978	1365.72
TMEM189	0.0106	17.78
GPR15	0.0191	0.3
CCNB1	0.0212	940.93
TRIB3	0.0216	17.78
LSM10	0.0266	5.65
CTU2	0.0274	940.93
PPGB	0.0274	311.87
LOC124057	0.0285	5.65
LOC197202	0.0288	5.65
LOC220610	0.0328	5.65
BCAS1	0.0337	14.2
GNB1L	0.0347	0.3
LOC92982	0.0357	5.65
GNGT1	0.0403	0.3
UXT	0.0423	17.78
EXOSC1	0.05	5.65
LOC115699	0.0536	25.21
FANCH	0.0546	0.27
