# Supplementary material for: Exosome component 1 cleaves single-stranded DNA and sensitizes human kidney renal clear cell carcinoma cells to poly(ADP-ribose) polymerase inhibitor
Source: eLife. 2021 Jun 23;10:e69454. doi: 10.7554/eLife.69454 (PMC8260222; doi:10.7554/eLife.69454)
Supplement: Supplementary file 4. [file elife-69454-supp4.xlsx]

## Sheet: Supplementary File 4
Names	Gene number	Gene
A>C/T>G A>G/T>C C>G/G>C	1	KCNK2
A>C/T>G A>T/T>A C>G/G>C	2	TM7SF3 CCDC125
A>C/T>G A>T/T>A C>A/G>T	1	SHMT2
A>C/T>G A>G/T>C	2	FUK TCTN1
A>C/T>G A>T/T>A	1	BIVM
A>C/T>G C>G/G>C	12	ANXA4 KRT80 SLC35E3 TMEM182 SPATS2 KIAA0895 MCCC2 MTRR NR1H4 NADK2 CERS2 RAD17
A>C/T>G C>T/G>A	1	C2ORF70
A>T/T>A C>G/G>C	3	PEX5 DNAJC22 PCBP2
A>T/T>A C>A/G>T	1	LPCAT3
C>G/G>C C>T/G>A	1	MRPS35
C>A/G>T C>G/G>C	1	DERA
C>A/G>T C>T/G>A	5	C20ORF24 HTATIP2 TARBP2 ASNS MLST8
A>C/T>G	29	TMEM163 RITA1 SLC25A13 ANKRD7 FUCA2 C17ORF58 COQ5 ATG10 TCTN2 ABCC3 SRD5A3 IRX5 MRPS27 TMEM19 METTL9 GUSB CHEK2 ARSB MCMDC2 M6PR ZC3HC1 KCNIP4 HOXA9 DRAM1 ALG8 HEXB AGBL5 GAA SLC4A2
A>G/T>C	1	ANXA13
A>T/T>A	13	HPN ACMSD SIRT4 MMACHC ACY1 ABHD6 CRB3 SLC39A5 UBE3B BCL7A PXMP2 ACSM5 ACSM2A
C>G/G>C	25	CMBL GFM2 DENND5B GCLM TMED2 DMGDH PAIP1 FASTKD3 TMEM200A AMACR CPSF4L C12ORF66 TMEM5 DTWD2 TFB2M RHPN2 STARD3NL ANO6 PKP2 WDR12 MRPL42 SPATA17 SMPDL3A NECAP1 PGK1
C>T/G>A	22	ORMDL2 PSAT1 C12ORF75 DCTPP1 ATP5B PRR13 GRIP1 ATP5G2 BCAT2 ACTR3B DNAH3 SDC4 C19ORF48 RAB26 MRPL15 AURKA SPIRE2 ATP5G1 CKS2 NECAB3 TLCD1 MAPKAPK3
C>A/G>T	35	MAGOHB ZFAS1 CNPY2 NAGPA PSMD9 MRPL36 SNHG11 GAPDH PHB2 TRAF4 CCNB1 RPLP0 C12ORF10 COPZ1 OR2AG3 CDK5 PIR POP4 EXOSC1 MYDGF PRDX4 RPL26L1 EXOSC5 LYRM1 TMEM258 PLIN3 CISD1 COASY SLC25A19 MGST1 UBE2T FLAD1 METTL1 BNIP1 RBKS
