# Supplementary material for: Exosome component 1 cleaves single-stranded DNA and sensitizes human kidney renal clear cell carcinoma cells to poly(ADP-ribose) polymerase inhibitor
Source: eLife. 2021 Jun 23;10:e69454. doi: 10.7554/eLife.69454 (PMC8260222; doi:10.7554/eLife.69454)
Supplement: Supplementary file 5. [file elife-69454-supp5.xlsx]

## Sheet: Supplementary File 5
Genes	mRNA NCBI Accession	5' Primer Sequence	3' Primer Sequence
AID	NM_020661.4	ATGGACAGCCTCTTGATG	TCAAAGTCCCAAAGTACG
CDK5	NM_004935.4	ATGCAGAAATACGAGAAACTGG	CTAGGGCGGACAGAAGTC
TARBP2	NM_134323.1	ATGAGTGAAGAGGAGCAAGG	TCACTTGCTGCCTGCCAT
EXOSC1	NM_016046.4	ATGGCGCCACCTGTGAGAT	TTAGGTCTGCAAGAATTCGGGT
RAB5IF	NM_018840.5	ATGAGCGGCGGGCG	AGTCAGTCATAATGGATGGCAGTG
CCNB1	NM_031966.4	ATGGCGCTCCGAGTCAC	TTACACCTTTGCCACAGCCTT
PSAT1	NM_058179.4	ATGGACGCCCCCAG	TCATAGCTGATGCATCTCC
NECAB3	NM_031232.3	ATGGCGTGCGCGGG	TCAGTTGTTATTCATTATCCACCAGG
EXOSC2	NM_014285.7	ATGGCGATGGAGATGAGGC	TTATCCCTCCTGTTCCAAAAGC
EXOSC3	NM_016042.4	ATGGCCGAACCTGCGTCT	TCAACTTTCTGCCAATCTGGAG
EXOSC4	NM_019037.3	ATGGCGGGGCTGGAG	TCAGTCCCCCAGCAAGATAG
EXOSC5	NM_020158.4	ATGGAGGAGGAGATGCATACTGACG	TCAGCTCTTGGAGTAACGCCTCT
EXOSC6	NM_058219.3	ATGCCTGGGGATCACCGCCG	TCAGGGCTGGGCGGCGGCG
EXOSC7	NM_015004.4	ATGGCGTCCGTGACGCTGAG	TCATCCCAGGAATCCAACTTTCTG
EXOSC8	NM_181503.3	ATGGCGGCTGGGTTC	TTATTTGGGTTTCATACTCTTAAT
EXOSC9	NM_005033	ATGAAGGAAACGCCACTCTC	TTAATTGGCAGCTCTCTTCTT
EXOSC1		GCCAGATGTGGGAGCTATTG	ACCTGGGCGGAAACTCTTAT	qPCR assays
XRCC1		ATGGGGAGCTCGAGGACTAT	CCCATAGAGCTGGTGAGGAA	qPCR assays
